# Supplementary material for: Whole-Genome Sequencing of Bradyrhizobium diazoefficiens 113-2 and Comparative Genomic Analysis Provide Molecular Insights Into Species Specificity and Host Specificity
Source: Front Microbiol. 2020 Nov 16;11:576800. doi: 10.3389/fmicb.2020.576800 (PMC7709874; doi:10.3389/fmicb.2020.576800)
Supplement: Supplementary Table 5 — Function annotation assignment from different databases. [file Table_5.XLSX]

## Sheet: Sheet1
			Table S5: Function annotation assignment from different databases.
			Database	Assigned Number	Percent (%)	No. of genes (Length≧2000bp)	No. of genes (Length 1000~2000bp)	No. of genes (Length 500~1000bp)
			COG	6261	0.7113	363(83%)	1951(79.5%)	2222(73.9%)
			GO	4876	0.554	361(82.2%)	1868(76.1%)	2028(67.4%)
			KEGG	4385	0.4982	299(68.1%)	1672(68.1%)	1757(58.4%)
			NR	8466	0.9619	439(100%)	2440(99.8%)	2990(99.4%)
			Swiss-Prot	2530	0.2874	161(36.7%)	944(38.5%)	1029(34.2%)
			IPR	6730	0.7646	424(96.6%)	2318(94.4%)	2723(90.5%)
			T3SS	1157	0.1314	75(17.1%)	377(15.4%)	358(11.9%)
			PHI	358	0.0406	59(13.4%)	164(6.7%)	93(3.1%)
			VFDB	351	0.0398	30(6.8%)	149(6.1%)	128(42.6%)
			ARDB	26	0.0029	9(2.1%)	8(3.3%)	7(2.3%)
			CAZY	89	0.0101	16(3.6%)	54(2.2%)	17(5.7%)
			Annotated	8537	0.97	439(100%)	2448(99.7%)	2998(99.7%)
			Total	8801	1	439(100%)	2455(100%)	3008(100%)
