# Supplementary material for: Whole-Genome Sequencing of Bradyrhizobium diazoefficiens 113-2 and Comparative Genomic Analysis Provide Molecular Insights Into Species Specificity and Host Specificity
Source: Front Microbiol. 2020 Nov 16;11:576800. doi: 10.3389/fmicb.2020.576800 (PMC7709874; doi:10.3389/fmicb.2020.576800)
Supplement: Supplementary Table 8 — The detail gene ID information in COG classification and annotation information of the genes in the six rhizobia. [file Table_8.XLSX]

## Sheet: Sheet1
	Table S8: The detail gene ID information in COG classification and annotation information of the genes in the six rhizobia.
	Representative Gene	Gene ID	Annotation	COG Class_id
	Dispensable cluster	USDA_110|WP_038968105.1 7653R|QGU21256.1 7653R|QGU21236.1 7653R|QGU21219.1 7653R|QGU21199.1 7653R|QGU21193.1 7653R|QGU21191.1 7653R|QGU21168.1 7653R|QGU21127.1 7653R|QGU21120.1 7653R|QGU21066.1 7653R|QGU21059.1 7653R|QGU21057.1 7653R|QGU21045.1 7653R|QGU21031.1 7653R|QGU21022.1 7653R|QGU21015.1 7653R|QGU20932.1 7653R|QGU20924.1 7653R|QGU20878.1 7653R|QGU20697.1 7653R|QGU20693.1 7653R|QGU20667.1 7…	Transposase	L
	Uniq cluster	7653R|QGU21201.1 7653R|QGU20605.1 7653R|QGU20606.1 7653R|QGU20620.1 7653R|QGU20640.1 7653R|QGU20676.1 7653R|QGU20684.1 7653R|QGU20687.1 7653R|QGU20759.1 7653R|QGU20772.1 7653R|QGU20867.1 7653R|QGU20893.1 7653R|QGU20900.1 7653R|QGU20975.1 7653R|QGU21020.1 7653R|QGU21051.1 7653R|QGU21071.1 7653R|QGU21116.1 7653R|QGU21125.1 7653R|QGU21150.1 7653R|QGU21159.1 7653R|QGU21194.1 7653R|QGU21200.1 7653R|QG…	Pfam:Transposase_11	L
	Core cluster	113_2|113-2GL007792 113_2|113-2GL000973 113_2|113-2GL003457 113_2|113-2GL004069 113_2|113-2GL004713 113_2|113-2GL007555 113_2|113-2GL007630 113_2|113-2GL007670 113_2|113-2GL007823 113_2|113-2GL007896 113_2|113-2GL007942 113_2|113-2GL008356 Sm2011|AGG75724.1 7653R|QGU21239.1 7653R|QGU21179.1 7653R|QGU21054.1 MAFF303099|WP_010913869.1 USDA_110|WP_011084518.1 USDA_110|WP_011084704.1 7653R|QGU21002.1…	Transposase	L
	Core cluster	113_2|113-2GL008355 USDA205|WP_014328473.1 Sm2011|AGG75723.1 MAFF303099|WP_010913877.1 USDA_110|WP_011084519.1 7653R|QGU21218.1 7653R|QGU21180.1 113_2|113-2GL007941 113_2|113-2GL007895 113_2|113-2GL007822 113_2|113-2GL007793 113_2|113-2GL007768 113_2|113-2GL007671 113_2|113-2GL007631 113_2|113-2GL007556 113_2|113-2GL004712 113_2|113-2GL004068 113_2|113-2GL003456 113_2|113-2GL000972 113_2|113-2GL0…	Transposase	L
	Dispensable cluster	Sm2011|AGG70106.1 Sm2011|AGG70262.1 USDA205|WP_014857536.1 7653R|QGU21209.1 7653R|QGU21182.1 7653R|QGU21067.1 7653R|QGU20970.1 7653R|QGU20948.1 7653R|QGU20920.1 7653R|QGU20898.1 7653R|QGU20860.1 7653R|QGU20810.1 7653R|QGU20793.1 7653R|QGU20762.1 7653R|QGU20719.1 7653R|QGU20649.1 7653R|QGU20603.1 7653R|AID35008.1 7653R|AID30096.1 USDA_110|WP_011090937.1 113_2|113-2GL000943	ATP-binding protein	L
	Dispensable cluster	Sm2011|AGG69895.1 Sm2011|AGG69933.1 Sm2011|AGG70043.1 Sm2011|AGG70428.1 Sm2011|AGG72744.1 Sm2011|AGG74612.1 Sm2011|AGG75567.1 7653R|QGU21226.1 7653R|QGU21208.1 7653R|QGU21184.1 7653R|QGU21111.1 7653R|QGU21052.1 7653R|QGU21044.1 7653R|QGU21012.1 7653R|QGU20868.1 7653R|QGU20838.1 7653R|QGU20804.1 7653R|QGU20644.1 7653R|AID32633.1 7653R|AID28167.2	Transposase	L
	Dispensable cluster	USDA_110|WP_011090936.1 Sm2011|AGG70261.1 7653R|QGU21183.1 7653R|QGU20971.1 7653R|QGU20947.1 7653R|QGU20921.1 7653R|QGU20899.1 7653R|QGU20859.1 7653R|QGU20811.1 7653R|QGU20792.1 7653R|QGU20720.1 7653R|QGU20650.1 7653R|QGU20602.1 7653R|AID35009.2 7653R|AID30095.2 113_2|113-2GL000944	Transposase	L
	Uniq cluster	7653R|AID30944.2 7653R|AID28647.2 7653R|AID31681.2 7653R|AID32040.2 7653R|AID34599.2 7653R|AID34828.2 7653R|QGU20683.1 7653R|QGU20857.1 7653R|QGU20907.1 7653R|QGU20916.1 7653R|QGU20923.1 7653R|QGU20942.1 7653R|QGU20980.1 7653R|QGU20988.1 7653R|QGU21160.1 7653R|AID31807.2	Pfam:Transposase_36	L
	Dispensable cluster	USDA205|WP_153451549.1 7653R|QGU21192.1 7653R|QGU21035.1 7653R|QGU20917.1 MAFF303099|WP_157866082.1 USDA_110|WP_011084489.1 113_2|113-2GL007965 7653R|AID34731.2 7653R|QGU20989.1 7653R|QGU21003.1 7653R|QGU21050.1 7653R|QGU21122.1 7653R|QGU21144.1 MAFF303099|WP_157866083.1 113_2|113-2GL007976	Transposase	L
	Dispensable cluster	113_2|113-2GL007743 113_2|113-2GL000875 113_2|113-2GL000904 113_2|113-2GL000931 113_2|113-2GL000947 113_2|113-2GL003089 113_2|113-2GL005596 113_2|113-2GL005610 113_2|113-2GL007576 113_2|113-2GL007906 113_2|113-2GL007916 113_2|113-2GL007960 Sm2011|AGG75690.1	Transposase	L
	Core cluster	USDA205|WP_037397735.1 Sm2011|AGG70118.1 7653R|AID33674.2 MAFF303099|WP_010913898.1 USDA_110|WP_011089385.1 113_2|113-2GL002586 USDA_110|WP_051000270.1 MAFF303099|WP_010914926.1 113_2|113-2GL002391 Sm2011|AGG70660.1 7653R|AID31433.1 MAFF303099|WP_010913746.1 Sm2011|AGG71369.1	ABC transporter	S
	Core cluster	USDA205|WP_034859522.1 USDA205|WP_015633548.1 USDA205|WP_037434081.1 USDA205|WP_037435258.1 Sm2011|AGG74700.1 USDA205|WP_014331580.1 USDA_110|WP_011084262.1 113_2|113-2GL008136 7653R|QGU21167.1 MAFF303099|WP_010913901.1 7653R|AID34596.2 7653R|AID34791.1	Cold shock protein	K
	Uniq cluster	Sm2011|AGG73176.1 Sm2011|AGG69688.1 Sm2011|AGG70686.1 Sm2011|AGG70816.1 Sm2011|AGG70987.1 Sm2011|AGG71296.1 Sm2011|AGG72485.1 Sm2011|AGG73392.1 Sm2011|AGG73634.1 Sm2011|AGG73905.1 Sm2011|AGG75592.1 Sm2011|AGG75684.1	Transposase	L
	Dispensable cluster	Sm2011|AGG75000.1 Sm2011|AGG70220.1 Sm2011|AGG71058.1 Sm2011|AGG74132.1 Sm2011|AGG74297.1 Sm2011|AGG74814.1 Sm2011|AGG75357.1 USDA205|WP_037471926.1 Sm2011|AGG70221.1 USDA_110|WP_011084954.1 113_2|113-2GL007527 MAFF303099|WP_010913682.1	Transposase	L
	Core cluster	USDA205|WP_014327641.1 Sm2011|AGG70022.1 USDA_110|WP_011088815.1 113_2|113-2GL003125 USDA205|WP_014857948.1 Sm2011|AGG70270.1 7653R|AID30426.2 MAFF303099|WP_010914181.1 USDA_110|WP_011087416.1 113_2|113-2GL004679 USDA205|WP_014857900.1 7653R|AID31705.1	CBS domain	S
	Dispensable cluster	113_2|113-2GL004698 USDA205|WP_153451328.1 MAFF303099|WP_010913673.1 USDA_110|WP_011087951.1 USDA205|WP_014858080.1 USDA_110|WP_011084472.1 113_2|113-2GL007995 USDA_110|WP_011087397.1 113_2|113-2GL004071 113_2|113-2GL001589 113_2|113-2GL001400	Transposase	L
	Core cluster	113_2|113-2GL004735 Sm2011|AGG74174.1 MAFF303099|WP_044550887.1 USDA_110|WP_011087367.1 MAFF303099|WP_010914539.1 USDA205|WP_037397690.1 7653R|AID30445.2 USDA_110|WP_038966228.1 113_2|113-2GL005850 USDA_110|WP_011089984.1 113_2|113-2GL001929	short-chain dehydrogenase reductase	S
	Core cluster	Sm2011|AGG70165.1 Sm2011|AGG74240.1 USDA205|WP_014328333.1 7653R|QGU20999.1 MAFF303099|WP_010914009.1 USDA_110|WP_011087378.1 113_2|113-2GL004723 7653R|QGU20798.1 MAFF303099|WP_010909693.1 7653R|AID28232.2 MAFF303099|WP_010914317.1	Catalyzes the first step in hexosamine metabolism, converting fructose-6P into glucosamine-6P using glutamine as a nitrogen source (By similarity)	M
	Core cluster	USDA205|WP_014329771.1 Sm2011|AGG70605.1 7653R|AID31721.1 MAFF303099|WP_010914280.1 USDA_110|WP_011090046.1 113_2|113-2GL001862 USDA205|WP_037393553.1 Sm2011|AGG70604.1 MAFF303099|WP_010914282.1 USDA_110|WP_011090058.1 113_2|113-2GL001846	Arginine ornithine antiporter	P
	Core cluster	USDA205|WP_037434924.1 Sm2011|AGG72532.1 7653R|AID28584.1 MAFF303099|WP_010913554.1 USDA_110|WP_162494213.1 113_2|113-2GL005803 USDA_110|WP_011089922.1 113_2|113-2GL002002 USDA_110|WP_011087071.1 113_2|113-2GL005151 MAFF303099|WP_010914692.1	Responsible for the transport of dicarboxylates such as succinate, fumarate, and malate from the periplasm across the membrane (By similarity)	C
	Uniq cluster	7653R|QGU20978.1 7653R|QGU20972.1 7653R|QGU20984.1 7653R|QGU20996.1 7653R|QGU20997.1 7653R|QGU21016.1 7653R|QGU21068.1 7653R|QGU21070.1 7653R|QGU21112.1 7653R|QGU21115.1 7653R|QGU21119.1	Transposase	L
	Dispensable cluster	113_2|113-2GL005595 113_2|113-2GL003090 113_2|113-2GL005611 113_2|113-2GL007742 USDA_110|WP_109866565.1 USDA_110|WP_085967575.1 113_2|113-2GL007915 113_2|113-2GL000874 113_2|113-2GL000903 113_2|113-2GL000930	Transposase	L
	Core cluster	113_2|113-2GL004437 USDA205|WP_014328262.1 Sm2011|AGG75897.1 7653R|AID32365.1 MAFF303099|WP_010911383.1 USDA_110|WP_011087613.1 7653R|QGU20911.1 MAFF303099|WP_010914217.1 USDA205|WP_037398611.1 MAFF303099|WP_010914575.1	ABC transporter	E
	Core cluster	USDA205|WP_153451448.1 USDA205|WP_153451446.1 Sm2011|AGG71566.1 Sm2011|AGG72741.1 7653R|AID33569.1 MAFF303099|WP_010912591.1 USDA_110|WP_011088673.1 113_2|113-2GL003272 7653R|AID34177.1 MAFF303099|WP_044548823.1	ABC transporter	V
	Core cluster	Sm2011|AGG70091.1 Sm2011|AGG70144.1 Sm2011|AGG70159.1 USDA205|WP_014857603.1 7653R|QGU21227.1 MAFF303099|WP_010913836.1 USDA205|WP_153451655.1 MAFF303099|WP_010913834.1 USDA_110|WP_011084820.1 113_2|113-2GL007653	LysR family transcriptional regulator	K
	Core cluster	Sm2011|AGG72154.1 Sm2011|AGG75157.1 USDA205|WP_037400583.1 MAFF303099|WP_010910698.1 USDA205|WP_037428529.1 Sm2011|AGG72431.1 7653R|AID31457.1 MAFF303099|WP_010909839.1 USDA_110|WP_011085462.1 113_2|113-2GL006881	ABC transporter	P
	Dispensable cluster	Sm2011|AGG73281.1 Sm2011|AGG72470.1 Sm2011|AGG72613.1 Sm2011|AGG72717.1 Sm2011|AGG72728.1 Sm2011|AGG74725.1 Sm2011|AGG74973.1 Sm2011|AGG74985.1 Sm2011|AGG75243.1 USDA205|WP_014327105.1	Transposase	L
	Core cluster	USDA205|WP_037397097.1 Sm2011|AGG74661.1 7653R|AID30848.1 MAFF303099|WP_010910134.1 USDA_110|WP_011086488.1 113_2|113-2GL005815 USDA_110|WP_011089718.1 113_2|113-2GL002234 USDA_110|WP_011088060.1 113_2|113-2GL003948	ABC transporter	V
	Core cluster	USDA205|WP_037434504.1 Sm2011|AGG70377.1 7653R|AID28194.1 MAFF303099|WP_010914012.1 USDA_110|WP_011089823.1 113_2|113-2GL002112 MAFF303099|WP_010913532.1 USDA_110|WP_011084804.1 113_2|113-2GL007663 MAFF303099|WP_010914201.1	Coproporphyrinogen iii oxidase	H
	Core cluster	USDA205|WP_014328378.1 Sm2011|AGG74346.1 7653R|AID30509.1 MAFF303099|WP_010909865.1 USDA_110|WP_028170858.1 113_2|113-2GL005733 USDA_110|WP_038967264.1 113_2|113-2GL004572 7653R|AID29386.1 MAFF303099|WP_044551676.1	Cytochrome C oxidase subunit I	S
	Dispensable cluster	USDA205|WP_060563659.1 7653R|AID30876.1 MAFF303099|WP_010910157.1 USDA_110|WP_011086679.1 113_2|113-2GL005588 7653R|AID33644.2 MAFF303099|WP_010913502.1 USDA_110|WP_011087229.1 7653R|AID32200.2 113_2|113-2GL004901	acriflavin resistance protein	P
	Core cluster	113_2|113-2GL000497 USDA205|WP_037436088.1 Sm2011|AGG71113.1 7653R|AID28539.1 MAFF303099|WP_010914655.1 USDA_110|WP_011083210.1 USDA205|WP_037429073.1 Sm2011|AGG72191.1 Sm2011|AGG72689.1	Dihydroxy-acid dehydratase	E
	Dispensable cluster	113_2|113-2GL001126 USDA205|WP_014857908.1 Sm2011|AGG70291.1 7653R|AID30431.1 USDA_110|WP_011090684.1 7653R|AID31742.1 USDA205|WP_014857839.1 USDA_110|WP_011087408.1 113_2|113-2GL004687	Heat shock protein	O
	Core cluster	113_2|113-2GL004485 USDA205|WP_014330590.1 Sm2011|AGG71884.1 7653R|AID34189.1 MAFF303099|WP_010913173.1 USDA_110|WP_011087570.1 USDA205|WP_014858088.1 7653R|AID27913.1 MAFF303099|WP_010913415.1	Two component transcriptional regulator, winged helix family	T
	Core cluster	113_2|113-2GL008597 USDA205|WP_037395210.1 MAFF303099|WP_010914231.1 USDA_110|WP_011083857.1 113_2|113-2GL006673 Sm2011|AGG73312.1 7653R|AID34229.1 MAFF303099|WP_010913210.1 USDA_110|WP_011085651.1	permease protein	P
	Dispensable cluster	113_2|113-2GL003284 Sm2011|AGG73662.1 USDA_110|WP_011088661.1 7653R|AID28844.1 MAFF303099|WP_010914933.1 USDA_110|WP_028174325.1 MAFF303099|WP_080512113.1 113_2|113-2GL007254 7653R|AID28216.2	Nad-dependent epimerase dehydratase	M
	Core cluster	USDA205|WP_153451578.1 USDA205|WP_153451587.1 USDA205|WP_153451598.1 Sm2011|AGG72416.1 7653R|AID29381.1 MAFF303099|WP_010915458.1 USDA_110|WP_011083753.1 7653R|AID33686.1 113_2|113-2GL008711	drug resistance transporter, EmrB QacA subfamily	P
	Core cluster	USDA205|WP_042778936.1 USDA205|WP_037395635.1 USDA205|WP_037435070.1 USDA205|WP_037435085.1 Sm2011|AGG69864.1 7653R|AID31015.1 MAFF303099|WP_010910286.1 USDA_110|WP_011090906.1 113_2|113-2GL000986	Short-chain dehydrogenase reductase SDR	S
	Dispensable cluster	USDA205|WP_014857910.1 USDA205|WP_014857844.1 USDA205|WP_014857854.1 7653R|AID32526.1 MAFF303099|WP_010911517.1 USDA_110|WP_028171431.1 113_2|113-2GL003936 USDA_110|WP_038966104.1 113_2|113-2GL001127	host attachment protein	N
	Dispensable cluster	USDA205|WP_037435032.1 USDA205|WP_050999917.1 MAFF303099|WP_010909814.1 Sm2011|AGG72168.1 USDA_110|WP_038967605.1 113_2|113-2GL003528 MAFF303099|WP_010909809.1 USDA_110|WP_038967234.1 113_2|113-2GL004518	signal transduction Histidine kinase	T
	Core cluster	USDA205|WP_037430313.1 USDA205|WP_037400585.1 USDA_110|WP_011085460.1 113_2|113-2GL006883 USDA_110|WP_011088527.1 113_2|113-2GL003425 Sm2011|AGG75135.1 7653R|AID32773.1 MAFF303099|WP_010911804.1	ABC transporter	G
	Core cluster	Sm2011|AGG71585.1 Sm2011|AGG73152.1 USDA205|WP_037391973.1 7653R|AID32338.2 MAFF303099|WP_010911356.1 USDA205|WP_037435968.1 USDA_110|WP_038966168.1 113_2|113-2GL001367 Sm2011|AGG71562.1	KpsF GutQ family protein	M
	Core cluster	Sm2011|AGG71383.1 Sm2011|AGG71921.1 Sm2011|AGG70974.1 USDA205|WP_037395631.1 Sm2011|AGG72006.1 7653R|AID31293.1 MAFF303099|WP_010910530.1 USDA_110|WP_028171505.1 113_2|113-2GL004052	(2Fe-2S)-binding domain protein	F
	Dispensable cluster	Sm2011|AGG71679.1 Sm2011|AGG71533.1 USDA205|WP_037456730.1 MAFF303099|WP_010913887.1 USDA_110|WP_011084591.1 113_2|113-2GL007532 113_2|113-2GL001438 USDA_110|WP_011090953.1 113_2|113-2GL000929	IS66 Orf2 family protein	L
	Core cluster	Sm2011|AGG70080.1 Sm2011|AGG73371.1 USDA205|WP_014327489.1 7653R|AID29351.2 MAFF303099|WP_010915432.1 USDA_110|WP_011090265.1 113_2|113-2GL001611 MAFF303099|WP_010913528.1 MAFF303099|WP_010915800.1	Prevents misfolding and promotes the refolding and proper assembly of unfolded polypeptides generated under stress conditions (By similarity)	O
	Core cluster	USDA205|WP_037434078.1 7653R|AID33539.1 MAFF303099|WP_010912564.1 USDA205|WP_037393651.1 Sm2011|AGG75334.1 USDA_110|WP_011089512.1 113_2|113-2GL002449 Sm2011|AGG69911.1 MAFF303099|WP_010916160.1	D- ligase	L
	Dispensable cluster	USDA205|WP_153451811.1 MAFF303099|WP_010910889.1 USDA205|WP_037391099.1 Sm2011|AGG73777.1 USDA_110|WP_011087983.1 113_2|113-2GL003600 Sm2011|AGG72014.1 USDA_110|WP_011088372.1 113_2|113-2GL004031	Prevents misfolding and promotes the refolding and proper assembly of unfolded polypeptides generated under stress conditions (By similarity)	O
	Core cluster	USDA205|WP_037431974.1 Sm2011|AGG71731.1 7653R|AID32947.1 MAFF303099|WP_010911959.1 USDA_110|WP_011089939.1 Sm2011|AGG71691.1 7653R|AID28340.1 113_2|113-2GL001985 Sm2011|AGG70885.1	(ABC) transporter	E
	Core cluster	USDA205|WP_153451475.1 Sm2011|AGG70344.1 USDA205|WP_014329367.1 Sm2011|AGG70014.1 7653R|AID28184.1 MAFF303099|WP_010914191.1 USDA_110|WP_008138466.1 113_2|113-2GL006773 MAFF303099|WP_006329249.1	cytochrome oxidase maturation protein cbb3-type	P
	Core cluster	USDA205|WP_037428516.1 Sm2011|AGG72405.1 7653R|AID31402.2 MAFF303099|WP_010910647.1 USDA_110|WP_011090737.1 113_2|113-2GL006409 USDA_110|WP_011084404.1 113_2|113-2GL007017 USDA_110|WP_011085904.1	Could be involved in D- repair (By similarity)	L
	Core cluster	USDA205|WP_037430180.1 Sm2011|AGG71191.1 7653R|AID34950.1 MAFF303099|WP_010914722.1 USDA_110|WP_011085370.1 113_2|113-2GL006989 USDA_110|WP_011084337.1 7653R|AID28625.2 113_2|113-2GL008059	fructose-bisphosphate aldolase	G
	Core cluster	USDA205|WP_153452137.1 7653R|AID33758.1 MAFF303099|WP_010912793.1 USDA205|WP_037435798.1 Sm2011|AGG69722.1 USDA_110|WP_011089129.1 113_2|113-2GL002303 USDA_110|WP_011089651.1 USDA_110|WP_011089139.1	ABC transporter	E
	Core cluster	USDA205|WP_037393101.1 Sm2011|AGG70834.1 7653R|AID30115.2 MAFF303099|WP_010909508.1 USDA_110|WP_011084175.1 113_2|113-2GL008235 Sm2011|AGG70440.1 USDA_110|WP_011083809.1 113_2|113-2GL008649	ABC transporter	E
	Dispensable cluster	USDA205|WP_037397143.1 Sm2011|AGG72340.1 USDA_110|WP_011090065.1 USDA_110|WP_011087840.1 113_2|113-2GL004192 113_2|113-2GL001838 USDA205|WP_037393549.1 Sm2011|AGG70601.1 MAFF303099|WP_010914276.1	acriflavin resistance protein	P
	Dispensable cluster	USDA205|WP_014329073.1 Sm2011|AGG72844.1 MAFF303099|WP_010912424.1 USDA_110|WP_011089332.1 113_2|113-2GL002642 Sm2011|AGG74087.1 USDA_110|WP_011088373.1 113_2|113-2GL003599 MAFF303099|WP_010910648.1	Excinuclease ABC C subunit	L
	Core cluster	USDA205|WP_014328172.1 Sm2011|AGG75702.1 7653R|AID33083.1 MAFF303099|WP_010912092.1 USDA_110|WP_011087195.1 113_2|113-2GL004938 MAFF303099|WP_010913933.1 USDA_110|WP_011090007.1 113_2|113-2GL001902	dihydrodipicolinate	E
	Dispensable cluster	USDA205|WP_086020626.1 MAFF303099|WP_157865845.1 USDA_110|WP_063921609.1 113_2|113-2GL007144 MAFF303099|WP_010915363.1 MAFF303099|WP_157865819.1 MAFF303099|WP_157865945.1 MAFF303099|WP_157866062.1 MAFF303099|WP_157866068.1	transposase	L
	Core cluster	USDA205|WP_060563596.1 Sm2011|AGG72691.1 7653R|AID28715.1 MAFF303099|WP_010914804.1 USDA_110|WP_011086226.1 113_2|113-2GL006075 Sm2011|AGG69710.1 7653R|AID30495.1 7653R|AID33840.1	SMP-30 Gluconolaconase LRE domain protein	G
	Core cluster	USDA205|WP_037397901.1 Sm2011|AGG72037.1 7653R|AID28387.1 MAFF303099|WP_010909835.1 USDA_110|WP_011085984.1 113_2|113-2GL006321 USDA205|WP_014331931.1 Sm2011|AGG72390.1 7653R|AID30908.2	ABC transporter	G
	Core cluster	USDA205|WP_014327729.1 Sm2011|AGG73600.1 7653R|AID28977.2 MAFF303099|WP_010915051.1 USDA205|WP_037435712.1 USDA_110|WP_028175379.1 113_2|113-2GL006398 USDA_110|WP_011085914.1 113_2|113-2GL006981	protease	O
	Core cluster	USDA205|WP_037433285.1 Sm2011|AGG70201.1 7653R|AID28520.2 MAFF303099|WP_010914635.1 USDA_110|WP_011086333.1 113_2|113-2GL005969 MAFF303099|WP_010916042.1 MAFF303099|WP_157866223.1 Sm2011|AGG70662.1	transcriptional regulator, gntR family	K
	Core cluster	USDA205|WP_037434510.1 Sm2011|AGG71940.1 7653R|AID31789.2 MAFF303099|WP_010916120.1 USDA_110|WP_063921653.1 113_2|113-2GL001671 Sm2011|AGG71948.1 USDA_110|WP_011090209.1 MAFF303099|WP_010915336.1	ribonuclease BN	S
	Core cluster	Sm2011|AGG75166.1 USDA205|WP_014857897.1 Sm2011|AGG72491.1 7653R|AID30695.1 MAFF303099|WP_044550579.1 USDA_110|WP_038966698.1 113_2|113-2GL003107 USDA_110|WP_038966753.1 113_2|113-2GL002932	ABC transporter	P
	Core cluster	USDA205|WP_014328358.1 Sm2011|AGG74208.1 7653R|AID29958.2 MAFF303099|WP_010916036.1 USDA_110|WP_011085963.1 113_2|113-2GL006342 USDA_110|WP_011084547.1 113_2|113-2GL007911 MAFF303099|WP_010909316.1	alanine dehydrogenase	E
	Core cluster	USDA205|WP_037390979.1 Sm2011|AGG73843.1 7653R|AID31523.1 MAFF303099|WP_010911004.1 USDA_110|WP_162494100.1 113_2|113-2GL004768 USDA_110|WP_038967426.1 7653R|AID31953.1 113_2|113-2GL004733	Cupin 2, conserved barrel domain protein	S
	Core cluster	USDA205|WP_014327671.1 Sm2011|AGG73545.1 7653R|AID29173.2 MAFF303099|WP_010910515.1 USDA_110|WP_011088005.1 113_2|113-2GL004007 USDA_110|WP_011085395.1 113_2|113-2GL006955 7653R|AID31268.1	reductase	C
	Core cluster	113_2|113-2GL005811 113_2|113-2GL004429 USDA_110|WP_038966217.1 USDA_110|WP_011087621.1 USDA205|WP_014328200.1 Sm2011|AGG74081.1 7653R|AID30152.2 MAFF303099|WP_010909545.1	Part of the outer membrane protein assembly complex, which is involved in assembly and insertion of beta-barrel proteins into the outer membrane (By similarity)	M
	Core cluster	113_2|113-2GL005604 113_2|113-2GL008034 USDA205|WP_100226779.1 Sm2011|AGG75689.1 MAFF303099|WP_157866075.1 USDA_110|WP_085973330.1 USDA205|WP_015633379.1 7653R|QGU21056.1	Transposase	L
	Core cluster	113_2|113-2GL005169 USDA205|WP_037395243.1 Sm2011|AGG73299.1 USDA_110|WP_162494092.1 7653R|AID28051.1 MAFF303099|WP_010914124.1 USDA_110|WP_011087443.1 113_2|113-2GL004648	acetoacetyl-coA	Q
	Core cluster	113_2|113-2GL000229 USDA205|WP_012709636.1 7653R|AID33269.1 MAFF303099|WP_010912291.1 USDA_110|WP_008142813.1 Sm2011|AGG75787.1 USDA_110|WP_008142802.1 113_2|113-2GL000234	nitrogen regulatory protein pii	E
	Core cluster	113_2|113-2GL007588 USDA205|WP_037396909.1 Sm2011|AGG74752.1 USDA_110|WP_011084897.1 7653R|AID29798.1 MAFF303099|WP_010909201.1 USDA_110|WP_011087920.1 113_2|113-2GL004102	Catalyzes the condensation of pantoate with beta-alanine in an ATP-dependent reaction via a pantoyl-adenylate intermediate (By similarity)	H
	Core cluster	113_2|113-2GL001231 USDA205|WP_037437517.1 Sm2011|AGG71880.1 USDA_110|WP_063921557.1 7653R|AID33531.1 MAFF303099|WP_010912556.1 USDA_110|WP_011088395.1 113_2|113-2GL003574	ABC, transporter	V
	Core cluster	113_2|113-2GL002126 7653R|AID33199.2 MAFF303099|WP_010912226.1 USDA_110|WP_038965517.1 USDA205|WP_014328207.1 Sm2011|AGG74090.1 USDA_110|WP_011086683.1 113_2|113-2GL005583	mota tolq exbb proton channel	U
	Core cluster	113_2|113-2GL001277 USDA205|WP_037398597.1 Sm2011|AGG75893.1 7653R|QGU20608.1 MAFF303099|WP_010912983.1 USDA_110|WP_011090554.1 USDA205|WP_037428540.1 Sm2011|AGG72397.1	Hydroxypyruvate reductase	G
	Core cluster	113_2|113-2GL000603 USDA205|WP_037391964.1 Sm2011|AGG73138.1 USDA_110|WP_011083114.1 7653R|AID33477.1 MAFF303099|WP_010912502.1 USDA_110|WP_038966235.1 113_2|113-2GL005797	cytochrome d ubiquinol oxidase, subunit ii	C
	Core cluster	113_2|113-2GL007642 USDA205|WP_037471368.1 Sm2011|AGG70128.1 7653R|QGU21117.1 7653R|AID34801.2 MAFF303099|WP_167316208.1 USDA_110|WP_011084834.1 MAFF303099|WP_044548983.1	Transcriptional regulator, NifA	K
	Core cluster	113_2|113-2GL006553 USDA205|WP_060564033.1 USDA_110|WP_028172340.1 Sm2011|AGG73530.1 7653R|AID29392.1 MAFF303099|WP_010915467.1 USDA_110|WP_011083121.1 113_2|113-2GL000596	Inherit from COG: response to pH	S
	Core cluster	113_2|113-2GL006841 USDA205|WP_037396043.1 Sm2011|AGG72147.1 7653R|AID33984.1 MAFF303099|WP_044548757.1 USDA_110|WP_063921425.1 USDA205|WP_037391571.1 Sm2011|AGG71807.1	class I monoheme cytochrome c	S
	Core cluster	113_2|113-2GL000662 7653R|AID32983.1 MAFF303099|WP_010911993.1 USDA_110|WP_028175239.1 USDA205|WP_014330175.1 Sm2011|AGG75861.1 USDA_110|WP_011086505.1 113_2|113-2GL005802	acetyl-coa acetyltransferase	I
	Dispensable cluster	113_2|113-2GL002509 USDA205|WP_037433134.1 USDA_110|WP_011089456.1 USDA205|WP_081319012.1 USDA205|WP_037428656.1 USDA205|WP_037433132.1 USDA205|WP_060563763.1 USDA205|WP_100209375.1	Transcriptional regulator	K
	Core cluster	USDA205|WP_153451241.1 USDA205|WP_153451294.1 Sm2011|AGG75236.1 Sm2011|AGG70451.1 7653R|AID32686.1 MAFF303099|WP_010911712.1 USDA_110|WP_011084196.1 113_2|113-2GL008214	Electron transfer flavoprotein	C
	Dispensable cluster	USDA205|WP_095689802.1 USDA205|WP_037437267.1 Sm2011|AGG71810.1 MAFF303099|WP_010910883.1 USDA_110|WP_038967943.1 113_2|113-2GL004038 USDA_110|WP_011089311.1 113_2|113-2GL002665	heat shock protein	O
	Dispensable cluster	USDA205|WP_037436840.1 USDA205|WP_037395821.1 USDA205|WP_037396697.1 USDA205|WP_037436837.1 USDA205|WP_060563915.1 USDA205|WP_060564067.1 USDA_110|WP_038966153.1 113_2|113-2GL001321	Inherit from COG: Guanylate Cyclase	T
	Dispensable cluster	USDA205|WP_153451237.1 USDA205|WP_153451547.1 USDA205|WP_153451705.1 USDA205|WP_153452050.1 Sm2011|AGG75738.1 USDA_110|WP_011084592.1 113_2|113-2GL007533 113_2|113-2GL001439	Transposase	L
	Dispensable cluster	USDA205|WP_109982124.1 USDA205|WP_014327347.1 USDA205|WP_037392033.1 Sm2011|AGG73249.1 Sm2011|AGG73250.1 Sm2011|AGG73251.1 MAFF303099|WP_010911283.1 7653R|AID32252.2	Flagellin	N
	Core cluster	USDA205|WP_014857946.1 USDA205|WP_014327637.1 Sm2011|AGG70269.1 Sm2011|AGG72687.1 7653R|AID31702.1 MAFF303099|WP_010914153.1 USDA_110|WP_038965926.1 113_2|113-2GL007097	Phosphoketolase	G
	Dispensable cluster	Sm2011|AGG70444.1 MAFF303099|WP_010913597.1 MAFF303099|WP_010915828.1 MAFF303099|WP_010916006.1 MAFF303099|WP_010915827.1 USDA_110|WP_011087315.1 Sm2011|AGG75558.1 113_2|113-2GL004790	Extracellular solute-binding protein, family 5	E
	Uniq cluster	Sm2011|AGG71752.1 Sm2011|AGG69925.1 Sm2011|AGG70239.1 Sm2011|AGG72224.1 Sm2011|AGG73181.1 Sm2011|AGG75085.1 Sm2011|AGG75735.1 Sm2011|AGG75880.1	transposase IS3 IS911 family protein	L
	Core cluster	Sm2011|AGG73918.1 Sm2011|AGG73933.1 USDA205|WP_012707739.1 7653R|QGU20828.1 7653R|AID29895.2 MAFF303099|WP_010909256.1 USDA_110|WP_011088152.1 113_2|113-2GL003850	This protein promotes the GTP-dependent binding of aminoacyl-tR- to the A-site of ribosomes during protein biosynthesis (By similarity)	J
	Core cluster	Sm2011|AGG69791.1 Sm2011|AGG71435.1 USDA205|WP_037436464.1 7653R|AID28375.2 MAFF303099|WP_010912353.1 USDA_110|WP_011085601.1 113_2|113-2GL006725 7653R|AID33326.1	gluconolactonase (EC 3.1.1.17)	G
	Uniq cluster	Sm2011|AGG75736.1 Sm2011|AGG69924.1 Sm2011|AGG70238.1 Sm2011|AGG71751.1 Sm2011|AGG72225.1 Sm2011|AGG73182.1 Sm2011|AGG75084.1 Sm2011|AGG75879.1	Transposase	L
	Core cluster	Sm2011|AGG70098.1 Sm2011|AGG70350.1 USDA205|WP_037395438.1 7653R|AID28190.1 MAFF303099|WP_010914197.1 USDA_110|WP_011085549.1 113_2|113-2GL006779 MAFF303099|WP_010914031.1	cytochrome c oxidase, cbb3-type, subunit ii	C
	Core cluster	Sm2011|AGG69714.1 Sm2011|AGG69806.1 USDA205|WP_037395615.1 USDA_110|WP_011089549.1 113_2|113-2GL002406 USDA205|WP_014766263.1 7653R|AID29509.1 MAFF303099|WP_032933350.1	GntR Family Transcriptional Regulator	K
	Core cluster	Sm2011|AGG74294.1 Sm2011|AGG70576.1 USDA205|WP_014328761.1 Sm2011|AGG74596.1 7653R|AID30285.1 MAFF303099|WP_010909656.1 USDA_110|WP_011084136.1 113_2|113-2GL008282	Bacterial protein of unknown function (DUF924)	S
	Core cluster	Sm2011|AGG72028.1 Sm2011|AGG70230.1 USDA205|WP_037430306.1 7653R|AID34150.1 MAFF303099|WP_010913136.1 USDA_110|WP_063921601.1 113_2|113-2GL000137 Sm2011|AGG70271.1	p-type atpase	P
	Core cluster	Sm2011|AGG73973.1 Sm2011|AGG70852.1 Sm2011|AGG71169.1 USDA205|WP_153451827.1 7653R|QGU20797.1 MAFF303099|WP_010909722.1 USDA_110|WP_011088955.1 113_2|113-2GL002967	alcohol dehydrogenase	C
	Core cluster	Sm2011|AGG70097.1 Sm2011|AGG70351.1 USDA205|WP_037395436.1 7653R|AID28191.1 MAFF303099|WP_010914198.1 USDA_110|WP_011085548.1 113_2|113-2GL006780 MAFF303099|WP_010914030.1	cytochrome c oxidase, cbb3-type subunit I	C
	Dispensable cluster	USDA205|WP_037428818.1 Sm2011|AGG72165.1 MAFF303099|WP_010909802.1 USDA205|WP_037402484.1 USDA_110|WP_011087138.1 113_2|113-2GL005074 USDA205|WP_037435741.1 Sm2011|AGG72419.1	NmrA-like family	S
	Core cluster	USDA205|WP_037391228.1 Sm2011|AGG73639.1 7653R|AID29018.1 MAFF303099|WP_044551576.1 USDA_110|WP_028171604.1 113_2|113-2GL004199 7653R|QGU21094.1 7653R|AID34573.1	Catalyzes the condensation of (S)-aspartate-beta- semialdehyde (S)-ASA and pyruvate to 4-hydroxy- tetrahydrodipicolinate (HTPA) (By similarity)	E
	Core cluster	USDA205|WP_014328870.1 Sm2011|AGG74672.1 7653R|AID30861.1 MAFF303099|WP_010910146.1 USDA_110|WP_011087865.1 113_2|113-2GL004166 7653R|AID31997.2 MAFF303099|WP_010911041.1	Transcriptional regulator	K
	Core cluster	USDA205|WP_086018580.1 Sm2011|AGG73666.1 USDA_110|WP_014498601.1 113_2|113-2GL000987 USDA205|WP_014327665.1 Sm2011|AGG73539.1 7653R|AID28927.1 MAFF303099|WP_010915004.1	ErfK YbiS YcfS YnhG family protein	S
	Core cluster	USDA205|WP_037400627.1 Sm2011|AGG74458.1 7653R|AID33145.1 MAFF303099|WP_044548405.1 USDA_110|WP_011088370.1 113_2|113-2GL003602 MAFF303099|WP_010910886.1 Sm2011|AGG72016.1	Usg family	E
	Core cluster	7653R|AID31435.1 USDA205|WP_037397740.1 Sm2011|AGG70120.1 7653R|AID32274.1 MAFF303099|WP_010911303.1 USDA_110|WP_063921533.1 113_2|113-2GL002584 Sm2011|AGG70657.1	binding-protein-dependent transport systems inner membrane component	E
	Core cluster	USDA205|WP_037428461.1 7653R|AID28180.2 USDA205|WP_037431964.1 Sm2011|AGG71738.1 7653R|AID32816.1 MAFF303099|WP_010911840.1 USDA_110|WP_011085515.1 113_2|113-2GL006818	binding-protein-dependent transport systems inner membrane component	P
	Core cluster	USDA205|WP_014329984.1 Sm2011|AGG75560.1 USDA_110|WP_011086730.1 113_2|113-2GL005536 USDA205|WP_014327401.1 Sm2011|AGG73305.1 7653R|AID33091.1 MAFF303099|WP_010912098.1	LysR family transcriptional regulator	K
	Core cluster	USDA205|WP_037400774.1 Sm2011|AGG75884.1 7653R|AID29504.1 MAFF303099|WP_044551704.1 USDA_110|WP_011087185.1 113_2|113-2GL004948 USDA_110|WP_011083921.1 113_2|113-2GL008524	OpgC protein	S
	Core cluster	USDA205|WP_014331330.1 Sm2011|AGG72381.1 7653R|AID28062.2 MAFF303099|WP_044549520.1 USDA_110|WP_011086694.1 113_2|113-2GL005572 7653R|AID29616.1 MAFF303099|WP_010915660.1	ABC transporter	E
	Core cluster	USDA205|WP_037430215.1 Sm2011|AGG70596.1 USDA205|WP_060563211.1 Sm2011|AGG75192.1 7653R|AID29579.1 MAFF303099|WP_044550254.1 USDA_110|WP_011088320.1 113_2|113-2GL003660	Transcriptional regulator, gntR family	K
	Core cluster	USDA205|WP_037397100.1 Sm2011|AGG74660.1 7653R|AID30846.1 MAFF303099|WP_010910132.1 USDA_110|WP_011086489.1 113_2|113-2GL005814 USDA_110|WP_011089720.1 113_2|113-2GL002232	efflux transporter, rnd family, mfp subunit	V
	Core cluster	USDA205|WP_037396825.1 Sm2011|AGG74874.1 7653R|AID32730.2 MAFF303099|WP_044548353.1 USDA_110|WP_011085427.1 113_2|113-2GL006921 7653R|AID30698.2 MAFF303099|WP_044547906.1	Protein of unknown function (DUF1194)	S
	Core cluster	USDA205|WP_080579308.1 7653R|AID31086.1 MAFF303099|WP_044550624.1 USDA_110|WP_011086751.1 113_2|113-2GL005513 USDA_110|WP_028170959.1 Sm2011|AGG72386.1 113_2|113-2GL005573	Transcriptional regulator, LacI family	K
	Core cluster	113_2|113-2GL001991 USDA205|WP_037433174.1 7653R|AID28078.1 MAFF303099|WP_010914512.1 USDA_110|WP_011083069.1 113_2|113-2GL000651 Sm2011|AGG71275.1 USDA_110|WP_011089933.1	transcriptional regulator, lysR family	K
	Core cluster	USDA205|WP_037432065.1 Sm2011|AGG70545.1 USDA205|WP_014330509.1 Sm2011|AGG72725.1 7653R|AID27854.2 MAFF303099|WP_010913356.1 USDA_110|WP_011084253.1 113_2|113-2GL008146	type II secretion system protein E	U
	Core cluster	USDA_110|WP_011089038.1 113_2|113-2GL002879 USDA205|WP_037431954.1 7653R|AID28213.1 MAFF303099|WP_010914298.1 USDA_110|WP_011088751.1 113_2|113-2GL003193 Sm2011|AGG71463.1	asparagine synthetase	E
	Core cluster	USDA205|WP_037398651.1 Sm2011|AGG75906.1 7653R|AID32356.1 MAFF303099|WP_010911374.1 USDA205|WP_037428848.1 Sm2011|AGG72701.1 USDA_110|WP_011085625.1 113_2|113-2GL006700	Protein of unknown function (DUF993)	S
	Core cluster	USDA205|WP_014327667.1 Sm2011|AGG73541.1 7653R|AID33295.1 MAFF303099|WP_010912317.1 USDA_110|WP_011083560.1 113_2|113-2GL000101 USDA_110|WP_011086212.1 113_2|113-2GL006089	organic hydroperoxide resistance protein	O
	Core cluster	USDA205|WP_153451850.1 Sm2011|AGG75320.1 7653R|AID33006.1 MAFF303099|WP_010912014.1 USDA_110|WP_011089792.1 113_2|113-2GL002145 USDA_110|WP_038965523.1 113_2|113-2GL002140	of the drug metabolite transporter (DMT) superfamily	S
	Core cluster	USDA205|WP_037430207.1 USDA_110|WP_011088325.1 113_2|113-2GL003655 USDA205|WP_037430396.1 Sm2011|AGG70594.1 7653R|AID29574.1 MAFF303099|WP_010915622.1 Sm2011|AGG75194.1	Hydantoin racemase	E
	Core cluster	USDA205|WP_037395528.1 Sm2011|AGG72244.1 7653R|AID33540.1 MAFF303099|WP_010916161.1 Sm2011|AGG69917.1 USDA_110|WP_011089513.1 MAFF303099|WP_010912565.1 113_2|113-2GL002448	Could be involved in D- repair (By similarity)	L
	Core cluster	USDA205|WP_037392267.1 Sm2011|AGG72375.1 7653R|AID34173.1 MAFF303099|WP_010913159.1 USDA_110|WP_011085196.1 113_2|113-2GL007225 USDA_110|WP_038966405.1 113_2|113-2GL002568	3-demethylubiquinone-9 3-methyltransferase	S
	Core cluster	USDA205|WP_153451407.1 Sm2011|AGG72302.1 7653R|AID28229.1 MAFF303099|WP_010909849.1 USDA_110|WP_011090638.1 113_2|113-2GL001189 Sm2011|AGG74625.1 MAFF303099|WP_052292105.1	Type I secretion system ATPase	V
	Core cluster	USDA205|WP_014327054.1 Sm2011|AGG72968.1 7653R|AID34216.1 MAFF303099|WP_010913198.1 USDA_110|WP_011088412.1 113_2|113-2GL003557 USDA_110|WP_028175650.1 113_2|113-2GL000545	carbon monoxide dehydrogenase	S
	Core cluster	USDA205|WP_086018816.1 Sm2011|AGG70179.1 7653R|AID34363.1 MAFF303099|WP_044547309.1 USDA_110|WP_011084736.1 113_2|113-2GL000832 USDA_110|WP_011091007.1 USDA_110|WP_011082896.1	-	-
	Core cluster	USDA205|WP_037394504.1 Sm2011|AGG75029.1 USDA_110|WP_038966151.1 113_2|113-2GL001316 USDA205|WP_037395198.1 Sm2011|AGG73319.1 7653R|AID32864.1 MAFF303099|WP_010911885.1	response regulator	T
	Dispensable cluster	USDA205|WP_037427463.1 113_2|113-2GL007969 113_2|113-2GL007791 113_2|113-2GL007710 113_2|113-2GL002865 113_2|113-2GL001395 113_2|113-2GL007751 113_2|113-2GL008007	Transposase	L
	Core cluster	USDA205|WP_014330102.1 Sm2011|AGG75769.1 7653R|AID33404.1 MAFF303099|WP_010912428.1 USDA205|WP_014858003.1 Sm2011|AGG70171.1 USDA_110|WP_011085810.1 113_2|113-2GL006508	D- polymerase involved in damage-induced mutagenesis and translesion synthesis (TLS). It is not the major replicative D- polymerase (By similarity)	L
	Core cluster	USDA205|WP_060563414.1 Sm2011|AGG74753.1 7653R|AID33703.1 MAFF303099|WP_010912741.1 USDA_110|WP_028175078.1 113_2|113-2GL007226 USDA_110|WP_011089793.1 113_2|113-2GL002144	glyoxalase bleomycin resistance protein	S
	Core cluster	USDA205|WP_060563735.1 Sm2011|AGG72693.1 USDA205|WP_037400841.1 Sm2011|AGG71003.1 7653R|AID27965.1 MAFF303099|WP_010914051.1 USDA_110|WP_011084700.1 113_2|113-2GL007771	ABC transporter	E
	Core cluster	USDA205|WP_037428827.1 Sm2011|AGG70748.1 7653R|AID32035.2 MAFF303099|WP_010911079.1 USDA_110|WP_011085033.1 113_2|113-2GL007437 USDA_110|WP_011083002.1 113_2|113-2GL000719	-	-
	Core cluster	USDA205|WP_060563669.1 Sm2011|AGG71331.1 7653R|AID28649.1 MAFF303099|WP_010914741.1 USDA205|WP_037395688.1 Sm2011|AGG70730.1 USDA_110|WP_011085210.1 113_2|113-2GL007205	acriflavin resistance protein	P
	Core cluster	USDA205|WP_014331332.1 Sm2011|AGG72379.1 7653R|AID31633.1 MAFF303099|WP_010910834.1 USDA_110|WP_028170961.1 113_2|113-2GL005570 USDA_110|WP_011089802.1 113_2|113-2GL002135	Binding-protein-dependent transport systems inner membrane component	G
	Core cluster	USDA205|WP_037397379.1 Sm2011|AGG72904.1 7653R|AID33502.1 MAFF303099|WP_010912524.1 USDA_110|WP_011089208.1 113_2|113-2GL002779 USDA_110|WP_011083276.1 113_2|113-2GL000427	rare lipoprotein a	M
	Core cluster	USDA205|WP_037398343.1 Sm2011|AGG72720.1 7653R|AID27848.2 MAFF303099|WP_032934014.1 USDA205|WP_037432077.1 Sm2011|AGG70550.1 USDA_110|WP_011084258.1 113_2|113-2GL008141	Peptidase A24A, prepilin type IV	U
	Core cluster	USDA205|WP_141322406.1 Sm2011|AGG69742.1 7653R|AID28780.1 MAFF303099|WP_010914862.1 USDA_110|WP_011087422.1 113_2|113-2GL004673 USDA_110|WP_011085412.1 113_2|113-2GL006937	DnaJ domain protein	O
	Core cluster	USDA205|WP_037393676.1 USDA_110|WP_028174704.1 113_2|113-2GL001752 USDA205|WP_050984017.1 Sm2011|AGG75323.1 7653R|AID33010.1 MAFF303099|WP_010912018.1 Sm2011|AGG75324.1	Membrane	M
	Core cluster	USDA205|WP_037401893.1 Sm2011|AGG74259.1 7653R|AID30328.1 MAFF303099|WP_010909697.1 USDA_110|WP_011085573.1 113_2|113-2GL006753 USDA_110|WP_011086292.1 113_2|113-2GL006009	biogenesis protein	O
	Core cluster	USDA205|WP_014327063.1 Sm2011|AGG72977.1 7653R|QGU20599.1 MAFF303099|WP_010913132.1 USDA_110|WP_011088657.1 113_2|113-2GL003288 USDA_110|WP_011083625.1 113_2|113-2GL000029	integral membrane protein mvin	S
	Core cluster	USDA205|WP_014329201.1 Sm2011|AGG72177.1 7653R|AID33845.1 MAFF303099|WP_010912850.1 USDA205|WP_153452108.1 Sm2011|AGG71849.1 USDA_110|WP_011090673.1 113_2|113-2GL001137	Phosphonate metabolism protein	S
	Core cluster	USDA205|WP_037394531.1 Sm2011|AGG75005.1 7653R|AID34293.1 MAFF303099|WP_044548859.1 USDA_110|WP_038967343.1 113_2|113-2GL001521 MAFF303099|WP_010914230.1 Sm2011|AGG75411.1	ABC transporter substrate-binding protein	S
	Core cluster	USDA205|WP_014330152.1 Sm2011|AGG75821.1 7653R|AID33339.1 MAFF303099|WP_010912364.1 USDA_110|WP_011090057.1 113_2|113-2GL001850 USDA_110|WP_028174871.1 113_2|113-2GL000406	integral membrane protein	S
	Core cluster	USDA205|WP_037428337.1 Sm2011|AGG72497.1 7653R|AID28554.1 MAFF303099|WP_010914670.1 USDA_110|WP_011090665.1 113_2|113-2GL001146 USDA_110|WP_011088413.1 113_2|113-2GL003556	3-carboxy-cis-cis-muconate cycloisomerase	Q
	Core cluster	USDA205|WP_037433272.1 Sm2011|AGG72301.1 7653R|AID28230.2 MAFF303099|WP_010909848.1 USDA_110|WP_028173732.1 113_2|113-2GL001190 Sm2011|AGG74626.1 MAFF303099|WP_010914315.1	Type I secretion membrane fusion protein (HlyD	U
	Core cluster	USDA205|WP_037394558.1 Sm2011|AGG75653.1 USDA_110|WP_011086176.1 113_2|113-2GL006127 USDA205|WP_037395475.1 Sm2011|AGG74510.1 7653R|AID32547.1 MAFF303099|WP_010911578.1	Oxidoreductase	S
	Core cluster	USDA205|WP_014329200.1 Sm2011|AGG72176.1 USDA_110|WP_011088905.1 113_2|113-2GL003024 USDA205|WP_037430359.1 Sm2011|AGG71799.1 7653R|AID33976.2 MAFF303099|WP_010912972.1	polysaccharide deacetylase	G
	Core cluster	USDA205|WP_014328210.1 Sm2011|AGG74093.1 7653R|AID30561.2 MAFF303099|WP_032930559.1 USDA_110|WP_038965742.1 113_2|113-2GL006500 USDA_110|WP_011087245.1 113_2|113-2GL004883	type I secretion outer membrane protein, TolC	U
	Core cluster	USDA205|WP_037396071.1 Sm2011|AGG74996.1 7653R|AID31044.1 MAFF303099|WP_010910314.1 USDA205|WP_037403150.1 Sm2011|AGG75892.1 USDA_110|WP_039185890.1 113_2|113-2GL007468	Aminotransferase	E
	Core cluster	USDA205|WP_037392708.1 Sm2011|AGG73431.1 7653R|AID33176.1 MAFF303099|WP_010912203.1 USDA_110|WP_011085281.1 113_2|113-2GL007125 USDA_110|WP_011090002.1 113_2|113-2GL001908	lema family	S
	Core cluster	USDA205|WP_037393477.1 Sm2011|AGG74052.1 7653R|AID33646.2 MAFF303099|WP_010912705.1 USDA_110|WP_011086612.1 113_2|113-2GL005678 USDA_110|WP_028175111.1 113_2|113-2GL000794	ferredoxin--nadp reductase	C
	Core cluster	USDA205|WP_037393663.1 Sm2011|AGG75335.1 7653R|AID33025.1 MAFF303099|WP_010912031.1 USDA_110|WP_011089947.1 113_2|113-2GL001977 USDA_110|WP_063921543.1 113_2|113-2GL001978	Thioesterase	S
	Core cluster	USDA205|WP_060563587.1 Sm2011|AGG69854.1 7653R|AID31992.1 MAFF303099|WP_010911038.1 USDA_110|WP_011089704.1 113_2|113-2GL002250 Sm2011|AGG70689.1 USDA_110|WP_011089101.1	Beta-lactamase domain-containing protein	S
	Core cluster	USDA205|WP_037430348.1 7653R|AID28086.1 USDA205|WP_037432410.1 Sm2011|AGG73397.1 7653R|AID29420.1 MAFF303099|WP_010915496.1 USDA_110|WP_011089568.1 113_2|113-2GL002387	transcriptional regulator, lysR family	K
	Core cluster	USDA205|WP_086021506.1 Sm2011|AGG70846.1 7653R|AID31994.1 MAFF303099|WP_010911039.1 USDA_110|WP_038965461.1 113_2|113-2GL001920 USDA_110|WP_011086300.1 113_2|113-2GL006001	sulfite oxidase	S
	Core cluster	USDA205|WP_037436735.1 Sm2011|AGG70828.1 USDA205|WP_037435550.1 Sm2011|AGG71723.1 7653R|AID31076.2 MAFF303099|WP_010910344.1 USDA_110|WP_011084301.1 113_2|113-2GL008094	sulfate ABC transporter	P
	Core cluster	USDA205|WP_037395451.1 Sm2011|AGG70347.1 7653R|AID28187.2 MAFF303099|WP_010914194.1 USDA_110|WP_011088522.1 113_2|113-2GL003430 USDA_110|WP_011085552.1 113_2|113-2GL006776	cytochrome c oxidase accessory protein ccog	C
	Core cluster	USDA205|WP_014328488.1 Sm2011|AGG74371.1 7653R|AID29811.1 MAFF303099|WP_010909214.1 USDA_110|WP_165448188.1 113_2|113-2GL004489 USDA_110|WP_011086712.1 113_2|113-2GL005553	glutaminase EC 3.5.1.2	E
	Core cluster	USDA205|WP_014329991.1 Sm2011|AGG75576.1 7653R|AID31716.2 MAFF303099|WP_010913433.1 USDA_110|WP_011084018.1 113_2|113-2GL008419 7653R|AID27933.2 MAFF303099|WP_010914173.1	5-aminolevulinate synthase	H
	Core cluster	USDA205|WP_060563764.1 Sm2011|AGG72097.1 7653R|AID32895.1 MAFF303099|WP_010911916.1 USDA_110|WP_011088064.1 113_2|113-2GL003944 7653R|AID31860.1 MAFF303099|WP_010910918.1	alkyl hydroperoxide reductase	O
	Core cluster	USDA205|WP_037433042.1 7653R|AID31524.2 MAFF303099|WP_010912908.1 USDA_110|WP_011088296.1 113_2|113-2GL003688 Sm2011|AGG72870.1 7653R|AID33906.1 Sm2011|AGG69980.1	LysR family transcriptional regulator	K
	Core cluster	USDA205|WP_037391538.1 Sm2011|AGG72487.1 7653R|AID33746.1 MAFF303099|WP_010912783.1 USDA_110|WP_011088691.1 113_2|113-2GL003253 USDA_110|WP_011083886.1 113_2|113-2GL008564	ABC transporter	E
	Core cluster	USDA205|WP_080577422.1 Sm2011|AGG75071.1 7653R|AID33294.2 MAFF303099|WP_010912316.1 USDA_110|WP_038965150.1 113_2|113-2GL000100 USDA205|WP_014327666.1 Sm2011|AGG73540.1	Transcriptional regulator, MarR family	K
	Core cluster	USDA205|WP_037393390.1 Sm2011|AGG74118.1 7653R|AID30528.1 MAFF303099|WP_010909881.1 USDA205|WP_014327248.1 Sm2011|AGG73149.1 USDA_110|WP_011087503.1 113_2|113-2GL004558	Part of the Sec protein translocase complex. Interacts with the SecYEG preprotein conducting channel. SecDF uses the proton motive force (PMF) to complete protein translocation after the ATP-dependent function of SecA (By similarity)	U
	Core cluster	USDA205|WP_014329001.1 Sm2011|AGG74843.1 7653R|AID33900.1 MAFF303099|WP_044548709.1 USDA_110|WP_063921431.1 113_2|113-2GL006593 MAFF303099|WP_157866189.1 MAFF303099|WP_157866190.1	carnitinyl-CoA dehydratase	I
	Core cluster	USDA205|WP_153451582.1 Sm2011|AGG72420.1 MAFF303099|WP_044548160.1 USDA_110|WP_038967955.1 113_2|113-2GL008399 7653R|AID31373.1 USDA_110|WP_011084035.1 113_2|113-2GL004070	Adenylate cyclase	T
	Core cluster	USDA205|WP_014331582.1 Sm2011|AGG74649.1 7653R|AID32414.1 MAFF303099|WP_010911429.1 USDA_110|WP_011083197.1 113_2|113-2GL000514 USDA_110|WP_011089854.1 113_2|113-2GL002082	30S ribosomal protein S21	J
	Core cluster	USDA205|WP_014327240.1 Sm2011|AGG73139.1 7653R|AID33476.1 MAFF303099|WP_010912501.1 USDA_110|WP_011083115.1 113_2|113-2GL000602 USDA_110|WP_011086509.1 113_2|113-2GL005798	oxidase, subunit i	C
	Core cluster	USDA205|WP_037431989.1 Sm2011|AGG71717.1 7653R|AID29000.1 MAFF303099|WP_044549809.1 USDA_110|WP_038967137.1 113_2|113-2GL004940 USDA_110|WP_011083807.1 113_2|113-2GL008651	carboxylase, alpha	I
	Core cluster	USDA205|WP_014330490.1 Sm2011|AGG72706.1 7653R|AID32453.1 MAFF303099|WP_010911453.1 USDA_110|WP_011088893.1 113_2|113-2GL003036 7653R|AID34979.1 MAFF303099|WP_010914549.1	ABC transporter	S
	Core cluster	USDA205|WP_037430378.1 Sm2011|AGG71808.1 USDA_110|WP_011086659.1 113_2|113-2GL005623 USDA205|WP_014329195.1 Sm2011|AGG72148.1 7653R|AID33985.1 MAFF303099|WP_010912981.1	Guanine deaminase	F
	Core cluster	USDA205|WP_037431912.1 Sm2011|AGG71211.1 7653R|AID32113.1 MAFF303099|WP_010911146.1 USDA_110|WP_011089391.1 113_2|113-2GL002580 7653R|AID30759.2 MAFF303099|WP_010910085.1	response regulator	T
	Dispensable cluster	USDA_110|WP_011090318.1 USDA_110|WP_011085508.1 USDA_110|WP_011088094.1 113_2|113-2GL001550 113_2|113-2GL006825 113_2|113-2GL003916 7653R|AID34014.1 MAFF303099|WP_010913009.1	indolepyruvate ferredoxin oxidoreductase	C
	Dispensable cluster	USDA_110|WP_011083638.1 7653R|AID28429.2 MAFF303099|WP_010913862.1 113_2|113-2GL000017 MAFF303099|WP_010913893.1 MAFF303099|WP_010915786.1 MAFF303099|WP_010916045.1 7653R|QGU21106.1	MmgE PrpD family protein	S
	Uniq cluster	7653R|QGU21196.1 7653R|AID34802.1 7653R|QGU20990.1 7653R|QGU21069.1 7653R|QGU21131.1 7653R|QGU21133.1 7653R|QGU21198.1 7653R|QGU21215.1	Transposase	L
	Core cluster	113_2|113-2GL004075 113_2|113-2GL007147 Sm2011|AGG70264.1 USDA_110|WP_038968086.1 USDA205|WP_037391811.1 7653R|AID33696.1 MAFF303099|WP_044551090.1	Beta-Ig-H3 fasciclin	M
	Dispensable cluster	113_2|113-2GL004764 7653R|AID28165.1 USDA_110|WP_011087339.1 USDA205|WP_037395884.1 USDA_110|WP_011086415.1 113_2|113-2GL005890 7653R|QGU20950.1	LamB YcsF family protein	S
	Core cluster	113_2|113-2GL008160 USDA205|WP_050994522.1 Sm2011|AGG72737.1 7653R|AID34280.1 MAFF303099|WP_010913275.1 USDA_110|WP_011084241.1 USDA205|WP_015633453.1	Extracellular solute-binding protein, family 5	E
	Core cluster	113_2|113-2GL006284 USDA205|WP_037398133.1 Sm2011|AGG72642.1 7653R|QGU20621.1 MAFF303099|WP_010916021.1 USDA_110|WP_011086022.1 MAFF303099|WP_010912608.1	Hydantoinase oxoprolinase	E, Q
	Core cluster	113_2|113-2GL001939 USDA_110|WP_011089974.1 USDA205|WP_037398363.1 Sm2011|AGG72712.1 7653R|AID32460.2 MAFF303099|WP_010911460.1 113_2|113-2GL002430	Catalyzes the conversion of uracil and 5-phospho-alpha- D-ribose 1-diphosphate (PRPP) to UMP and diphosphate (By similarity)	F
	Core cluster	113_2|113-2GL001563 USDA205|WP_153451341.1 Sm2011|AGG71441.1 7653R|AID29133.1 MAFF303099|WP_010915192.1 USDA_110|WP_011090307.1 Sm2011|AGG72074.1	UDP-glucose 4'-epimerase	M
	Core cluster	113_2|113-2GL008630 USDA205|WP_037400576.1 Sm2011|AGG70254.1 7653R|AID32894.2 MAFF303099|WP_010910706.1 USDA_110|WP_011083827.1 MAFF303099|WP_032933832.1	Beta-lactamase domain protein	P
	Core cluster	113_2|113-2GL005445 USDA205|WP_037397984.1 Sm2011|AGG75563.1 7653R|AID33664.1 USDA_110|WP_011086814.1 MAFF303099|WP_010912782.1 7653R|AID33745.1	ABC transporter	E
	Dispensable cluster	113_2|113-2GL006353 USDA205|WP_037401882.1 Sm2011|AGG71436.1 MAFF303099|WP_010916116.1 USDA_110|WP_028172203.1 Sm2011|AGG73332.1 Sm2011|AGG74265.1	Conserved Protein	S
	Core cluster	113_2|113-2GL002251 USDA205|WP_037436013.1 7653R|AID32086.1 USDA_110|WP_011089703.1 Sm2011|AGG70641.1 7653R|AID29324.2 MAFF303099|WP_010911123.1	alpha/beta hydrolase fold	S
	Core cluster	113_2|113-2GL002409 Sm2011|AGG69868.1 7653R|AID28036.2 MAFF303099|WP_044549298.1 USDA_110|WP_011089546.1 USDA205|WP_037401353.1 7653R|AID28408.1	Short-chain dehydrogenase reductase SDR	S
	Core cluster	113_2|113-2GL006777 USDA205|WP_037395441.1 Sm2011|AGG70100.1 7653R|AID28188.1 MAFF303099|WP_010914195.1 USDA_110|WP_011085551.1 Sm2011|AGG70348.1	C-type cytochrome. Part of the cbb3-type cytochrome c oxidase complex (By similarity)	C
	Core cluster	113_2|113-2GL008049 USDA205|WP_037435077.1 Sm2011|AGG71328.1 7653R|AID32974.1 MAFF303099|WP_010911984.1 USDA_110|WP_038965397.1 USDA205|WP_037436705.1	Aldehyde oxidase and xanthine dehydrogenase, molybdopterin binding	C
	Core cluster	113_2|113-2GL008047 USDA205|WP_037435078.1 Sm2011|AGG70504.1 7653R|AID31872.1 MAFF303099|WP_010911985.1 USDA_110|WP_038965393.1 7653R|AID32976.1	isoquinoline 1-oxidoreductase (Alpha subunit)	C
	Dispensable cluster	113_2|113-2GL000923 7653R|QGU21064.1 7653R|QGU21210.1 USDA_110|WP_011090955.1 MAFF303099|WP_157866200.1 113_2|113-2GL007956 7653R|QGU21000.1	Ulp1 protease family, C-terminal catalytic domain	S
	Core cluster	113_2|113-2GL001811 Sm2011|AGG75173.1 7653R|AID32382.2 MAFF303099|WP_010911400.1 USDA_110|WP_011090089.1 USDA205|WP_037397019.1 Sm2011|AGG74805.1	N-formylglutamate amidohydrolase	E
	Core cluster	113_2|113-2GL003435 USDA205|WP_014328584.1 Sm2011|AGG74475.1 7653R|AID31473.1 MAFF303099|WP_044550708.1 USDA_110|WP_011088517.1 Sm2011|AGG70253.1	Transcriptional regulator	K
	Dispensable cluster	USDA205|WP_153451404.1 USDA205|WP_153451314.1 Sm2011|AGG70188.1 Sm2011|AGG71682.1 MAFF303099|WP_010913459.1 MAFF303099|WP_010909791.1 113_2|113-2GL007719	transfer relaxase TraA	L
	Dispensable cluster	USDA205|WP_015633368.1 USDA205|WP_014857686.1 MAFF303099|WP_010916164.1 MAFF303099|WP_010915775.1 USDA_110|WP_011084508.1 113_2|113-2GL007954 113_2|113-2GL000925	WGR	S
	Dispensable cluster	USDA205|WP_153451580.1 USDA205|WP_109982171.1 USDA205|WP_153451585.1 Sm2011|AGG72417.1 MAFF303099|WP_010909820.1 USDA_110|WP_011090320.1 113_2|113-2GL001547	secretion protein HlyD family	V
	Core cluster	USDA205|WP_037434931.1 USDA205|WP_037436036.1 USDA_110|WP_028172264.1 113_2|113-2GL006442 Sm2011|AGG72025.1 7653R|AID31466.1 MAFF303099|WP_010910714.1	Transcriptional Regulator, ArsR family	K
	Dispensable cluster	USDA205|WP_042778501.1 USDA205|WP_015633547.1 USDA205|WP_014858027.1 Sm2011|AGG70996.1 7653R|AID34349.2 MAFF303099|WP_010915939.1 7653R|AID34594.2	Replication protein c	L
	Dispensable cluster	Sm2011|AGG75525.1 Sm2011|AGG72679.1 USDA205|WP_153451667.1 7653R|AID34998.1 USDA_110|WP_011088696.1 113_2|113-2GL003248 Sm2011|AGG70866.1	formyltetrahydrofolate deformylase	F
	Dispensable cluster	Sm2011|AGG71294.1 Sm2011|AGG69689.1 Sm2011|AGG70684.1 Sm2011|AGG70817.1 Sm2011|AGG70988.1 Sm2011|AGG72482.1 USDA205|WP_086021249.1	Transposase	L
	Dispensable cluster	Sm2011|AGG70095.1 Sm2011|AGG70353.1 7653R|AID31753.1 MAFF303099|WP_010914156.1 USDA_110|WP_011086250.1 113_2|113-2GL006050 7653R|AID31699.1	Transcriptional regulator	T
	Dispensable cluster	Sm2011|AGG69808.1 Sm2011|AGG69785.1 7653R|AID29589.1 USDA_110|WP_011088606.1 MAFF303099|WP_010911002.1 113_2|113-2GL003341 7653R|AID31951.2	methyl viologen resistance protein	P
	Core cluster	Sm2011|AGG70452.1 Sm2011|AGG75235.1 USDA205|WP_014331027.1 7653R|AID32685.1 MAFF303099|WP_010911711.1 USDA_110|WP_011084195.1 113_2|113-2GL008215	Electron transfer flavoprotein	C
	Core cluster	Sm2011|AGG71742.1 Sm2011|AGG70153.1 USDA205|WP_037431956.1 7653R|AID28870.1 MAFF303099|WP_010914956.1 USDA_110|WP_011084291.1 113_2|113-2GL008104	Sulfate adenylyltransferase subunit 1 Adenylylsulfate kinase	P
	Dispensable cluster	Sm2011|AGG73151.1 Sm2011|AGG72127.1 USDA205|WP_037394313.1 7653R|AID33468.1 MAFF303099|WP_010910348.1 MAFF303099|WP_010912494.1 7653R|AID31080.1	Transcriptional regulator, BadM Rrf2 family	K
	Core cluster	USDA205|WP_037430485.1 Sm2011|AGG71835.1 7653R|AID33189.1 MAFF303099|WP_010912217.1 USDA_110|WP_011083139.1 113_2|113-2GL000574 7653R|AID33415.1	Transcriptional regulator	K
	Core cluster	USDA205|WP_037398646.1 Sm2011|AGG75916.1 7653R|AID33359.2 MAFF303099|WP_032932283.1 USDA_110|WP_011086640.1 113_2|113-2GL005647 Sm2011|AGG70811.1	lytic murein transglycosylase	M
	Core cluster	USDA205|WP_037433269.1 Sm2011|AGG70721.1 7653R|AID28083.2 MAFF303099|WP_010914517.1 USDA205|WP_060563899.1 USDA_110|WP_011089450.1 113_2|113-2GL002516	fad dependent oxidoreductase	S
	Core cluster	USDA205|WP_037399852.1 USDA_110|WP_028175651.1 113_2|113-2GL000544 USDA205|WP_014329994.1 Sm2011|AGG75579.1 7653R|AID30591.1 MAFF303099|WP_032930572.1	dehydrogenase small subunit	C
	Core cluster	USDA205|WP_014328439.1 Sm2011|AGG69984.1 7653R|AID31182.1 MAFF303099|WP_010910438.1 7653R|AID31520.1 USDA_110|WP_038967414.1 113_2|113-2GL004734	Aldo keto reductase	C
	Core cluster	USDA205|WP_014330503.1 Sm2011|AGG72719.1 7653R|AID27847.1 MAFF303099|WP_010913350.1 USDA205|WP_037395065.1 USDA_110|WP_028173014.1 113_2|113-2GL002057	Flp Fap pilin component	U
	Core cluster	USDA205|WP_037432470.1 Sm2011|AGG71024.1 7653R|AID30998.1 MAFF303099|WP_010910268.1 USDA_110|WP_011086110.1 113_2|113-2GL006195 MAFF303099|WP_010915908.1	5-oxoprolinase	E
	Core cluster	USDA205|WP_037394461.1 Sm2011|AGG75042.1 7653R|AID28506.2 MAFF303099|WP_010914629.1 USDA_110|WP_011086909.1 113_2|113-2GL005339 Sm2011|AGG69699.1	LysR family transcriptional regulator	K
	Dispensable cluster	USDA205|WP_037399209.1 7653R|AID28525.1 MAFF303099|WP_010914640.1 USDA_110|WP_011086398.1 113_2|113-2GL005907 USDA_110|WP_011083875.1 113_2|113-2GL008577	ABC transporter, (ATP-binding protein)	E
	Core cluster	USDA205|WP_037394072.1 Sm2011|AGG75497.1 7653R|AID34270.1 MAFF303099|WP_010913265.1 USDA_110|WP_011083963.1 113_2|113-2GL008478 113_2|113-2GL008477	D- ligase	L
	Core cluster	USDA205|WP_037391945.1 Sm2011|AGG73136.1 7653R|AID27934.2 MAFF303099|WP_044548915.1 USDA205|WP_060563590.1 USDA_110|WP_028173210.1 113_2|113-2GL003273	UDP-glucose 4'-epimerase	M
	Core cluster	USDA205|WP_060563286.1 Sm2011|AGG70345.1 7653R|AID28185.2 MAFF303099|WP_010914192.1 USDA_110|WP_011085554.1 113_2|113-2GL006774 MAFF303099|WP_010914036.1	p-type atpase	P
	Core cluster	USDA205|WP_014330725.1 Sm2011|AGG72871.1 7653R|QGU20663.1 MAFF303099|WP_032933756.1 USDA205|WP_037402433.1 USDA_110|WP_038966726.1 113_2|113-2GL003015	Domain of unknown function (DUF892)	S
	Core cluster	USDA205|WP_037434050.1 Sm2011|AGG71486.1 USDA_110|WP_011088528.1 113_2|113-2GL003424 7653R|AID32774.1 MAFF303099|WP_010911805.1 Sm2011|AGG71962.1	ABC transporter	P
	Dispensable cluster	USDA205|WP_014857941.1 7653R|AID31750.1 USDA_110|WP_011090709.1 113_2|113-2GL001099 USDA205|WP_153451394.1 Sm2011|AGG70294.1 7653R|AID31580.1	Efflux transporter, RND family, MFP subunit	P
	Core cluster	USDA205|WP_014329813.1 Sm2011|AGG75438.1 7653R|AID32393.1 MAFF303099|WP_032933750.1 USDA_110|WP_011086736.1 113_2|113-2GL005529 Sm2011|AGG70162.1	nodulation protein	I
	Core cluster	USDA205|WP_037435439.1 7653R|AID32420.2 MAFF303099|WP_010911435.1 USDA_110|WP_011089515.1 113_2|113-2GL002446 USDA205|WP_014327145.1 Sm2011|AGG70954.1	osmosensitive K channel signal transduction histidine kinase	T
	Core cluster	USDA205|WP_153451274.1 USDA_110|WP_011085868.1 113_2|113-2GL006448 USDA205|WP_037434939.1 Sm2011|AGG73654.1 7653R|AID31467.1 MAFF303099|WP_010910715.1	arsenate reductase	P
	Core cluster	USDA205|WP_037399549.1 Sm2011|AGG73374.1 7653R|AID34973.1 MAFF303099|WP_010915465.1 USDA_110|WP_028174657.1 113_2|113-2GL001669 7653R|AID29390.1	HAD-superfamily subfamily IIA hydrolase	G
	Core cluster	USDA205|WP_012706990.1 Sm2011|AGG73372.1 7653R|AID29352.1 MAFF303099|WP_010915433.1 MAFF303099|WP_010913529.1 USDA_110|WP_011090264.1 113_2|113-2GL001613	Binds to Cpn60 in the presence of Mg-ATP and suppresses the ATPase activity of the latter (By similarity)	O
	Core cluster	USDA205|WP_153452103.1 Sm2011|AGG75159.1 7653R|AID28679.1 MAFF303099|WP_044549682.1 USDA_110|WP_011086009.1 113_2|113-2GL006297 7653R|AID28366.1	Short chain dehydrogenase	S
	Core cluster	USDA205|WP_037434377.1 7653R|AID34218.1 MAFF303099|WP_044548833.1 USDA_110|WP_028171619.1 113_2|113-2GL004223 USDA205|WP_037399553.1 Sm2011|AGG73373.1	Rhodanese domain protein	P
	Core cluster	USDA205|WP_037397047.1 Sm2011|AGG74839.1 7653R|AID33894.1 MAFF303099|WP_032933947.1 USDA_110|WP_011088206.1 MAFF303099|WP_010915906.1 113_2|113-2GL003793	Prokaryotic protein of unknown function (DUF849)	S
	Dispensable cluster	USDA205|WP_037400895.1 Sm2011|AGG69771.1 MAFF303099|WP_044549546.1 USDA_110|WP_162494205.1 113_2|113-2GL006203 USDA_110|WP_038965238.1 113_2|113-2GL008591	Transcriptional regulator, gntR family	K
	Core cluster	USDA205|WP_014327400.1 Sm2011|AGG73302.1 USDA205|WP_034859947.1 7653R|AID28053.1 MAFF303099|WP_010914126.1 USDA_110|WP_011090130.1 113_2|113-2GL001765	Phasin protein	S
	Core cluster	USDA205|WP_037428525.1 7653R|AID28236.1 MAFF303099|WP_010914321.1 USDA_110|WP_011083214.1 113_2|113-2GL000493 Sm2011|AGG69711.1 Sm2011|AGG71103.1	GntR Family Transcriptional Regulator	K
	Dispensable cluster	USDA205|WP_014329741.1 Sm2011|AGG70752.1 7653R|AID32065.1 USDA_110|WP_011083667.1 113_2|113-2GL008787 USDA_110|WP_038966584.1 113_2|113-2GL007347	Pfam:Bug	S
	Core cluster	USDA205|WP_037391192.1 Sm2011|AGG73674.1 7653R|QGU21075.1 MAFF303099|WP_010913549.1 USDA_110|WP_011085328.1 113_2|113-2GL007070 MAFF303099|WP_010916028.1	L-aspartate oxidase	H
	Core cluster	USDA205|WP_060563405.1 Sm2011|AGG71809.1 7653R|AID31558.1 MAFF303099|WP_010910882.1 USDA_110|WP_011087977.1 113_2|113-2GL004036 MAFF303099|WP_010910783.1	HeAt shock protein	O
	Core cluster	USDA205|WP_037432048.1 Sm2011|AGG71009.1 7653R|AID31794.2 MAFF303099|WP_010916106.1 USDA_110|WP_082901046.1 113_2|113-2GL004047 MAFF303099|WP_010915332.1	D- ligase	L
	Core cluster	USDA205|WP_014332653.1 7653R|AID33098.2 MAFF303099|WP_010912105.1 USDA205|WP_060564021.1 Sm2011|AGG73706.1 USDA_110|WP_038967543.1 113_2|113-2GL005412	Catalyzes the interconversion of L-alanine and D- alanine. May also act on other amino acids (By similarity)	M
	Dispensable cluster	USDA205|WP_014857922.1 Sm2011|AGG70304.1 MAFF303099|WP_010915335.1 USDA_110|WP_162494129.1 113_2|113-2GL003299 USDA_110|WP_014497709.1 113_2|113-2GL007515	Histidine kinase	T
	Core cluster	USDA205|WP_037395588.1 Sm2011|AGG70688.1 7653R|QGU20674.1 MAFF303099|WP_010911105.1 USDA_110|WP_011084069.1 113_2|113-2GL008343 Sm2011|AGG72160.1	Alpha Beta Hydrolase Fold protein	S
	Dispensable cluster	USDA205|WP_037438020.1 7653R|QGU21242.1 7653R|QGU21217.1 7653R|QGU20818.1 7653R|AID30571.2 7653R|QGU21154.1 MAFF303099|WP_010913789.1	Transposase	L
	Core cluster	USDA205|WP_037397193.1 7653R|AID30360.1 MAFF303099|WP_032930445.1 USDA205|WP_014332002.1 Sm2011|AGG71185.1 USDA_110|WP_011088956.1 113_2|113-2GL002966	Catalyzes the condensation of formaldehyde and glutathione to S-hydroxymethylglutathione (By similarity)	C
	Core cluster	USDA205|WP_014329345.1 Sm2011|AGG75107.1 7653R|AID30512.2 MAFF303099|WP_032933484.1 113_2|113-2GL001599 USDA_110|WP_011089377.1 113_2|113-2GL002594	cytochrome c	C
	Dispensable cluster	USDA205|WP_014857928.1 Sm2011|AGG70308.1 7653R|AID31719.1 MAFF303099|WP_010914245.1 Sm2011|AGG70352.1 MAFF303099|WP_010914170.1 MAFF303099|WP_044547274.1	Pyridoxamine 5'-phosphate oxidase	S
	Core cluster	USDA205|WP_014328331.1 Sm2011|AGG74242.1 7653R|AID31894.1 MAFF303099|WP_010910946.1 USDA_110|WP_011087216.1 113_2|113-2GL004914 Sm2011|AGG71984.1	Na Pi-cotransporter	P
	Core cluster	USDA205|WP_037402011.1 7653R|AID31516.1 MAFF303099|WP_010910753.1 USDA_110|WP_028174796.1 113_2|113-2GL006726 USDA205|WP_014329335.1 Sm2011|AGG75097.1	Aldehyde dehydrogenase	C
	Core cluster	USDA205|WP_037396473.1 Sm2011|AGG74356.1 USDA205|WP_037402381.1 7653R|AID29693.1 MAFF303099|WP_010909104.1 USDA_110|WP_011088474.1 113_2|113-2GL003489	Domain of unknown function (DUF1476)	S
	Core cluster	USDA205|WP_060563497.1 MAFF303099|WP_080511778.1 USDA_110|WP_011085503.1 113_2|113-2GL006830 USDA205|WP_037401804.1 Sm2011|AGG71632.1 7653R|AID31814.1	nuclease	L
	Core cluster	USDA205|WP_014327235.1 Sm2011|AGG73134.1 7653R|AID27931.2 MAFF303099|WP_032934029.1 USDA_110|WP_027547170.1 113_2|113-2GL004200 MAFF303099|WP_010912648.1	Channel that opens in response to stretch forces in the membrane lipid bilayer. May participate in the regulation of osmotic pressure changes within the cell (By similarity)	M
	Core cluster	USDA205|WP_014329613.1 Sm2011|AGG75650.1 USDA_110|WP_011086174.1 113_2|113-2GL006129 7653R|AID28059.1 MAFF303099|WP_044551470.1 Sm2011|AGG70944.1	ABC transporter (permease)	G
	Core cluster	USDA205|WP_037431984.1 Sm2011|AGG71722.1 USDA205|WP_037435704.1 7653R|AID28532.2 MAFF303099|WP_010914648.1 USDA_110|WP_011090693.1 113_2|113-2GL001117	FAD linked oxidase domain protein	C
	Core cluster	USDA205|WP_037392300.1 Sm2011|AGG70414.1 7653R|AID32607.1 MAFF303099|WP_044552293.1 MAFF303099|WP_010911636.1 USDA_110|WP_011086166.1 113_2|113-2GL006138	UPF0261 protein	E
	Dispensable cluster	USDA205|WP_014858007.1 7653R|AID34354.2 MAFF303099|WP_044547305.1 USDA_110|WP_014490278.1 113_2|113-2GL000831 USDA_110|WP_028176021.1 113_2|113-2GL007732	ParB domain protein nuclease	K
	Core cluster	USDA205|WP_037399611.1 Sm2011|AGG73303.1 7653R|AID33204.1 MAFF303099|WP_010912230.1 USDA_110|WP_011084122.1 113_2|113-2GL008298 Sm2011|AGG74276.1	Short-chain dehydrogenase reductase SDR	S
	Core cluster	USDA205|WP_037428921.1 Sm2011|AGG74830.1 7653R|AID28615.1 MAFF303099|WP_010914712.1 Sm2011|AGG70943.1 USDA_110|WP_018645270.1 113_2|113-2GL007777	ABC transporter	G
	Dispensable cluster	USDA205|WP_014330457.1 7653R|AID33151.1 MAFF303099|WP_010912176.1 USDA_110|WP_011088305.1 113_2|113-2GL003678 7653R|AID33727.1 MAFF303099|WP_010912765.1	transglutaminase domain protein	E
	Dispensable cluster	USDA205|WP_037393079.1 Sm2011|AGG71569.1 7653R|AID34993.2 MAFF303099|WP_010913552.1 7653R|QGU21255.1 MAFF303099|WP_010912866.1 7653R|AID33861.1	Transcriptional regulator	K
	Core cluster	USDA205|WP_014328162.1 Sm2011|AGG74042.1 7653R|AID29992.1 MAFF303099|WP_010909347.1 USDA_110|WP_038967356.1 113_2|113-2GL001544 Sm2011|AGG69729.1	Aminotransferase	E
	Core cluster	USDA205|WP_060563208.1 USDA_110|WP_011090628.1 113_2|113-2GL001199 USDA205|WP_037435049.1 7653R|AID31329.1 MAFF303099|WP_010910569.1 Sm2011|AGG70935.1	LysR family transcriptional regulator	K
	Core cluster	USDA205|WP_037434919.1 Sm2011|AGG72534.1 7653R|AID28586.1 MAFF303099|WP_010914694.1 USDA_110|WP_011086512.1 113_2|113-2GL005795 MAFF303099|WP_010913556.1	two component, sigma54 specific, transcriptional regulator, Fis family	T
	Core cluster	USDA205|WP_014327465.1 Sm2011|AGG73346.1 7653R|AID28306.1 MAFF303099|WP_032933113.1 USDA_110|WP_038965283.1 113_2|113-2GL008471 Sm2011|AGG70784.1	Transcriptional regulator, LysR family	K
	Core cluster	USDA205|WP_037436135.1 Sm2011|AGG71162.1 USDA205|WP_037433118.1 7653R|AID30592.1 MAFF303099|WP_032930573.1 USDA_110|WP_011083160.1 113_2|113-2GL000552	GfdT protein	S
	Core cluster	USDA205|WP_037399507.1 Sm2011|AGG73396.1 7653R|AID33606.2 MAFF303099|WP_010912669.1 USDA205|WP_141322263.1 USDA_110|WP_063921504.1 113_2|113-2GL002949	Diguanylate cyclase	T
	Core cluster	USDA205|WP_014329069.1 Sm2011|AGG74905.1 7653R|AID31888.1 MAFF303099|WP_032931318.1 USDA_110|WP_011082959.1 113_2|113-2GL000764 MAFF303099|WP_032930708.1	GYD family	S
	Core cluster	USDA205|WP_037393001.1 Sm2011|AGG71513.1 7653R|AID33287.1 MAFF303099|WP_010912308.1 USDA_110|WP_011087119.1 113_2|113-2GL005097 MAFF303099|WP_157865997.1	Diguanylate cyclase	T
	Core cluster	USDA205|WP_037391199.1 Sm2011|AGG73675.1 7653R|QGU21155.1 7653R|QGU21076.1 MAFF303099|WP_010916029.1 USDA_110|WP_011085327.1 113_2|113-2GL007071	nicotinate-nucleotide pyrophosphorylase	H
	Core cluster	USDA205|WP_037394039.1 Sm2011|AGG75518.1 7653R|AID30911.1 MAFF303099|WP_010910184.1 USDA_110|WP_011090883.1 113_2|113-2GL002261 113_2|113-2GL001011	Part of the ABC transporter complex ModABC involved in molybdenum import. Responsible for energy coupling to the transport system (By similarity)	P
	Core cluster	USDA205|WP_037434459.1 Sm2011|AGG72004.1 7653R|AID31295.1 MAFF303099|WP_010910532.1 USDA_110|WP_011085007.1 113_2|113-2GL007471 Sm2011|AGG71381.1	Xanthine dehydrogenase	F
	Core cluster	USDA205|WP_153452130.1 Sm2011|AGG73562.1 7653R|AID29771.1 MAFF303099|WP_010909177.1 USDA_110|WP_011087107.1 113_2|113-2GL005110 Sm2011|AGG73563.1	Protein of unknown function (DUF1697)	S
	Dispensable cluster	USDA205|WP_037395829.1 Sm2011|AGG71026.1 7653R|AID32477.1 USDA_110|WP_011089210.1 113_2|113-2GL002776 USDA_110|WP_011089253.1 113_2|113-2GL002731	Pfam:Bug	S
	Core cluster	USDA205|WP_037396069.1 Sm2011|AGG74997.1 7653R|AID29766.2 MAFF303099|WP_010909172.1 USDA_110|WP_011085949.1 113_2|113-2GL006357 Sm2011|AGG70634.1	adenine deaminase	F
	Core cluster	USDA205|WP_037430480.1 USDA_110|WP_008130072.1 113_2|113-2GL004139 USDA205|WP_014328191.1 Sm2011|AGG74072.1 7653R|AID30166.1 MAFF303099|WP_010909560.1	endoribonuclease L-psp	J
	Core cluster	USDA205|WP_060563704.1 Sm2011|AGG72554.1 7653R|AID31547.1 MAFF303099|WP_010910774.1 USDA_110|WP_011086912.1 113_2|113-2GL005336 Sm2011|AGG70945.1	Binding-protein-dependent transport systems, inner membrane component	G
	Core cluster	USDA205|WP_037391193.1 Sm2011|AGG73673.1 7653R|QGU21074.1 MAFF303099|WP_006333927.1 USDA_110|WP_011085329.1 113_2|113-2GL007069 MAFF303099|WP_010916027.1	Catalyzes the condensation of iminoaspartate with dihydroxyacetone phosphate to form quinolinate (By similarity)	H
	Dispensable cluster	USDA205|WP_014857904.1 MAFF303099|WP_010914178.1 USDA_110|WP_011085546.1 113_2|113-2GL006782 7653R|AID31732.1 7653R|AID30420.2 7653R|AID31713.1	UspA domain protein	T
	Core cluster	USDA205|WP_037397937.1 Sm2011|AGG69994.1 7653R|AID28460.1 MAFF303099|WP_010911233.1 USDA_110|WP_011085589.1 113_2|113-2GL006738 MAFF303099|WP_010914590.1	ABC transporter	P
	Dispensable cluster	USDA205|WP_060563289.1 7653R|QGU20918.1 7653R|QGU20922.1 7653R|QGU20937.1 7653R|QGU20981.1 7653R|QGU20983.1 7653R|QGU20992.1	Transposase	L
	Core cluster	USDA205|WP_060563640.1 7653R|AID34127.1 MAFF303099|WP_010913112.1 USDA_110|WP_011086352.1 113_2|113-2GL005953 Sm2011|AGG70421.1 7653R|AID32599.2	ABC transporter, (ATP-binding protein)	E
	Dispensable cluster	USDA205|WP_037399237.1 7653R|AID33647.1 MAFF303099|WP_010912706.1 USDA_110|WP_038966185.1 113_2|113-2GL005903 USDA_110|WP_011089915.1 113_2|113-2GL002010	5-oxoprolinase (ATP-hydrolyzing)	E
	Core cluster	USDA205|WP_037428561.1 Sm2011|AGG72383.1 7653R|AID32305.1 MAFF303099|WP_010911326.1 USDA_110|WP_028170962.1 113_2|113-2GL005568 Sm2011|AGG69816.1	nad-dependent epimerase dehydratase	G, M
	Core cluster	USDA205|WP_014327747.1 Sm2011|AGG73619.1 7653R|AID29644.1 MAFF303099|WP_010914940.1 USDA_110|WP_028174100.1 113_2|113-2GL004917 MAFF303099|WP_044547401.1	glycosyl transferase family	M
	Core cluster	USDA205|WP_014328828.1 Sm2011|AGG74639.1 7653R|AID33553.1 MAFF303099|WP_010912573.1 Sm2011|AGG71949.1 USDA_110|WP_011085494.1 113_2|113-2GL006839	L-sorbosone dehydrogenase	C
	Core cluster	USDA205|WP_010875356.1 Sm2011|AGG70157.1 7653R|QGU21228.1 MAFF303099|WP_010913829.1 USDA_110|WP_011084823.1 113_2|113-2GL004001 USDA_110|WP_011088009.1	Polysaccharide deacetylase	G
	Core cluster	USDA205|WP_052340290.1 Sm2011|AGG73680.1 7653R|QGU21073.1 MAFF303099|WP_010916026.1 USDA_110|WP_028175624.1 113_2|113-2GL007059 MAFF303099|WP_010913550.1	Inherit from proNOG: cytoplasmic membrane protein	S
	Core cluster	USDA205|WP_014327096.1 Sm2011|AGG73009.1 7653R|AID31334.1 MAFF303099|WP_010910575.1 USDA_110|WP_011086797.1 113_2|113-2GL005463 Sm2011|AGG71477.1	LysR family transcriptional regulator	K
	Core cluster	USDA205|WP_037393556.1 Sm2011|AGG70606.1 7653R|AID31722.1 MAFF303099|WP_032928907.1 USDA_110|WP_011090045.1 113_2|113-2GL001863 Sm2011|AGG70055.1	Arginine dihydrolase	E
	Core cluster	USDA205|WP_060563410.1 Sm2011|AGG74798.1 7653R|AID32635.1 MAFF303099|WP_010911664.1 USDA_110|WP_038967133.1 113_2|113-2GL005065 MAFF303099|WP_044548228.1	ErfK, YbiS	M
	Core cluster	USDA205|WP_037395543.1 Sm2011|AGG69754.1 7653R|AID31870.1 MAFF303099|WP_010910929.1 USDA_110|WP_011090748.1 113_2|113-2GL005763 USDA_110|WP_011086543.1	-	-
	Dispensable cluster	MAFF303099|WP_010910827.1 Sm2011|AGG70894.1 7653R|AID31626.1 USDA_110|WP_038967349.1 113_2|113-2GL001531 USDA_110|WP_011089062.1 113_2|113-2GL002853	Aldehyde dehydrogenase	C
	Core cluster	USDA205|WP_037397653.1 Sm2011|AGG74156.1 7653R|QGU21104.1 7653R|AID31931.2 MAFF303099|WP_010910981.1 USDA_110|WP_011090112.1 113_2|113-2GL001784	Carbamoyl-phosphate synthetase ammonia chain	F
	Core cluster	USDA205|WP_014329579.1 Sm2011|AGG75282.1 7653R|AID31216.1 MAFF303099|WP_010909953.1 USDA_110|WP_011089995.1 113_2|113-2GL001917 7653R|AID30621.2	Transcriptional	K
	Core cluster	USDA205|WP_037403146.1 Sm2011|AGG69813.1 7653R|AID30197.1 MAFF303099|WP_010916186.1 USDA_110|WP_028175323.1 113_2|113-2GL000558 MAFF303099|WP_044547671.1	Alpha-alpha-trehalose-phosphate synthase	G
	Dispensable cluster	USDA205|WP_037395827.1 Sm2011|AGG71028.1 7653R|AID32479.1 USDA_110|WP_027544749.1 113_2|113-2GL002730 USDA_110|WP_011086238.1 113_2|113-2GL006063	membrane	S
	Core cluster	USDA205|WP_037394253.1 Sm2011|AGG71474.1 7653R|QGU20946.1 MAFF303099|WP_044549436.1 USDA_110|WP_063921569.1 113_2|113-2GL001408 USDA_110|WP_011090437.1	Isochorismatase, hydrolase	Q
	Core cluster	USDA205|WP_014329196.1 Sm2011|AGG72149.1 7653R|AID28316.1 MAFF303099|WP_010914417.1 USDA_110|WP_011090144.1 113_2|113-2GL001748 7653R|AID31372.2	L-lactate dehydrogenase	C
	Dispensable cluster	Sm2011|AGG71437.1 7653R|AID30063.2 MAFF303099|WP_010909457.1 USDA_110|WP_038966769.1 113_2|113-2GL002918 USDA_110|WP_011086652.1 113_2|113-2GL005630	Transcriptional regulator	K
	Dispensable cluster	Sm2011|AGG73731.1 7653R|AID29120.2 MAFF303099|WP_010915181.1 USDA_110|WP_063921454.1 113_2|113-2GL005373 USDA_110|WP_011084755.1 113_2|113-2GL007706	Organic solvent tolerance protein	M
	Dispensable cluster	USDA_110|WP_011090919.1 7653R|QGU21083.1 7653R|QGU20959.1 7653R|QGU20764.1 7653R|QGU20692.1 7653R|AID35002.2 113_2|113-2GL000961	integrase catalytic	L
	Uniq cluster	7653R|QGU21028.1 7653R|QGU20915.1 7653R|QGU20928.1 7653R|QGU20930.1 7653R|QGU20933.1 7653R|QGU21010.1 7653R|QGU21032.1	Transposase	L
	Core cluster	113_2|113-2GL000038 USDA205|WP_014327072.1 Sm2011|AGG72985.1 7653R|AID34312.1 MAFF303099|WP_044548867.1 USDA_110|WP_011083617.1	Catalyzes the methylthiolation of N6- (dimethylallyl)adenosine (i(6)A), leading to the formation of 2- methylthio-N6-(dimethylallyl)adenosine (ms(2)i(6)A) at position 37 in tR-s that read codons beginning with uridine (By similarity)	J
	Core cluster	113_2|113-2GL004264 USDA205|WP_014327909.1 Sm2011|AGG73804.1 7653R|AID29549.1 MAFF303099|WP_010915608.1 USDA_110|WP_011087781.1	Catalyzes the condensation reaction of fatty acid synthesis by the addition to an acyl acceptor of two carbons from malonyl-ACP. Catalyzes the first condensation reaction which initiates fatty acid synthesis and may therefore play a role in governing the total rate of fatty acid production. Possesses both acetoacetyl-ACP synthase and acetyl transacylase activities. Its substrate specificity deter…	I
	Core cluster	113_2|113-2GL005440 USDA205|WP_014330545.1 Sm2011|AGG72765.1 7653R|AID34213.1 MAFF303099|WP_010915569.1 USDA_110|WP_011086819.1	Phosphate transporter	P
	Core cluster	113_2|113-2GL005429 USDA205|WP_141322066.1 Sm2011|AGG74159.1 7653R|AID31914.1 MAFF303099|WP_010910963.1 USDA_110|WP_162494218.1	tetracycline resistance protein	P
	Core cluster	113_2|113-2GL000199 USDA205|WP_037398701.1 Sm2011|AGG72585.1 7653R|AID33452.1 MAFF303099|WP_010912480.1 USDA_110|WP_011083466.1	Catalyzes the phosphorylation of the 3'-hydroxyl group of dephosphocoenzyme A to form coenzyme A (By similarity)	H
	Core cluster	113_2|113-2GL006362 USDA205|WP_153451595.1 Sm2011|AGG72401.1 USDA_110|WP_038966068.1 7653R|AID29867.2 MAFF303099|WP_010909246.1	Transcriptional regulator	K
	Dispensable cluster	113_2|113-2GL004040 Sm2011|AGG71115.1 7653R|AID30199.1 MAFF303099|WP_010909589.1 USDA_110|WP_011087973.1 Sm2011|AGG72031.1	Glycosyl Transferase	M
	Core cluster	113_2|113-2GL000302 USDA205|WP_153451994.1 Sm2011|AGG72815.1 7653R|AID32270.1 MAFF303099|WP_010911299.1 USDA_110|WP_011083388.1	Major facilitator superfamily	G
	Core cluster	113_2|113-2GL003665 USDA205|WP_037401785.1 Sm2011|AGG73993.1 7653R|AID29789.2 MAFF303099|WP_010909193.1 USDA_110|WP_028176079.1	type IV pilus assembly pilz	S
	Core cluster	113_2|113-2GL001721 USDA205|WP_037400563.1 Sm2011|AGG74487.1 7653R|AID32023.1 MAFF303099|WP_010911066.1 USDA_110|WP_011090165.1	damaged site, the D- wraps around one UvrB monomer. D- wrap is dependent on ATP binding by UvrB and probably causes local melting of the D- helix, facilitating insertion of UvrB beta-hairpin between the D- strands. Then UvrB probes one D- strand for the presence of a lesion. If a lesion is found the UvrA subunits dissociate and the UvrB-D- preincision complex is formed. This complex is subsequent…	L
	Core cluster	113_2|113-2GL003616 USDA205|WP_014328346.1 Sm2011|AGG74220.1 7653R|AID29751.1 MAFF303099|WP_010909160.1 USDA_110|WP_011088357.1	molybdopterin binding domain	H
	Core cluster	113_2|113-2GL000702 USDA205|WP_037394636.1 Sm2011|AGG75267.1 7653R|AID32750.1 MAFF303099|WP_010911780.1 USDA_110|WP_011083018.1	CBS domain protein	P
	Core cluster	113_2|113-2GL001565 7653R|AID31414.1 MAFF303099|WP_010910659.1 USDA_110|WP_011090305.1 USDA205|WP_037392360.1 Sm2011|AGG72348.1	lipopolysaccharide biosynthesis protein	M
	Core cluster	113_2|113-2GL000379 USDA205|WP_037393760.1 Sm2011|AGG75804.1 7653R|AID33289.2 MAFF303099|WP_010912310.1 USDA_110|WP_011083319.1	Catalyzes the isomerization between 2-isopropylmalate and 3-isopropylmalate, via the formation of 2-isopropylmaleate (By similarity)	E
	Core cluster	113_2|113-2GL008395 USDA205|WP_037428385.1 Sm2011|AGG72463.1 7653R|AID32569.1 MAFF303099|WP_010911598.1 USDA_110|WP_162494051.1	Phosphonate C-P lyase system protein PhnG	P
	Core cluster	113_2|113-2GL007057 USDA205|WP_037391179.1 Sm2011|AGG73682.1 7653R|AID29048.1 MAFF303099|WP_010915120.1 USDA_110|WP_011085339.1	Metal dependent phosphohydrolase	S
	Core cluster	113_2|113-2GL005101 USDA205|WP_014328409.1 Sm2011|AGG74315.1 7653R|AID29655.2 MAFF303099|WP_044550339.1 USDA_110|WP_011087115.1	fes assembly suf system protein	S
	Core cluster	113_2|113-2GL000308 USDA205|WP_014330118.1 Sm2011|AGG75671.1 7653R|AID33243.1 MAFF303099|WP_044548441.1 USDA_110|WP_011083382.1	glutamine amidotransferase	F
	Core cluster	113_2|113-2GL007088 USDA205|WP_080577281.1 Sm2011|AGG73422.1 7653R|AID28749.1 MAFF303099|WP_010914834.1 USDA_110|WP_038965922.1	Catalyzes the phosphorylation of the position 2 hydroxy group of 4-diphosphocytidyl-2C-methyl-D-erythritol (By similarity)	I
	Core cluster	113_2|113-2GL000704 USDA205|WP_014329564.1 Sm2011|AGG75265.1 7653R|AID32746.1 MAFF303099|WP_019861454.1 USDA_110|WP_011083016.1	DnaJ domain protein	O
	Core cluster	113_2|113-2GL004626 USDA205|WP_037397677.1 Sm2011|AGG74166.1 7653R|AID30231.1 MAFF303099|WP_010909613.1 USDA_110|WP_011087458.1	Transfers and isomerizes the ribose moiety from AdoMet to the 7-aminomethyl group of 7-deazaguanine (preQ1-tR-) to give epoxyqueuosine (oQ-tR-) (By similarity)	J
	Core cluster	113_2|113-2GL002340 USDA205|WP_014327337.1 Sm2011|AGG73240.1 7653R|AID32243.1 MAFF303099|WP_010911274.1 USDA_110|WP_011089613.1	flagellar basal-body rod protein (FlgC)	N
	Core cluster	113_2|113-2GL001831 USDA205|WP_014329652.1 Sm2011|AGG75317.1 7653R|AID32893.2 MAFF303099|WP_010911914.1 USDA_110|WP_011090072.1	Sigma factors are initiation factors that promote the attachment of R- polymerase to specific initiation sites and are then released (By similarity)	K
	Core cluster	113_2|113-2GL001036 USDA205|WP_081318981.1 Sm2011|AGG75432.1 7653R|AID28879.1 MAFF303099|WP_044551553.1 USDA_110|WP_038967714.1	Phosphorylase is an important allosteric enzyme in carbohydrate metabolism. Enzymes from different sources differ in their regulatory mechanisms and in their natural substrates. However, all known phosphorylases share catalytic and structural properties (By similarity)	G
	Core cluster	113_2|113-2GL003685 USDA205|WP_014328116.1 Sm2011|AGG73996.1 7653R|AID29792.1 MAFF303099|WP_010909196.1 USDA_110|WP_011088299.1	protein with cbs domains	S
	Core cluster	113_2|113-2GL000597 USDA205|WP_037398018.1 Sm2011|AGG75595.1 7653R|AID34206.1 MAFF303099|WP_010913190.1 USDA_110|WP_011083120.1	Necessary for formate dehydrogenase activity (By similarity)	C
	Core cluster	113_2|113-2GL007523 USDA205|WP_037434376.1 Sm2011|AGG74280.1 7653R|AID28373.1 MAFF303099|WP_010913490.1 USDA_110|WP_011084957.1	Short-chain dehydrogenase reductase SDR	S
	Core cluster	113_2|113-2GL004108 USDA205|WP_153451830.1 Sm2011|AGG73990.1 7653R|AID30176.1 MAFF303099|WP_010909567.1 USDA_110|WP_011087914.1	carboxypeptidase	M
	Core cluster	113_2|113-2GL005392 USDA205|WP_014327832.1 Sm2011|AGG73725.1 7653R|AID29114.2 MAFF303099|WP_010915175.1 USDA_110|WP_011086861.1	YicC domain protein	S
	Core cluster	113_2|113-2GL002640 USDA205|WP_037431034.1 Sm2011|AGG74756.1 7653R|AID30975.1 MAFF303099|WP_010910246.1 USDA_110|WP_011089334.1	Part of the outer membrane protein assembly complex, which is involved in assembly and insertion of beta-barrel proteins into the outer membrane (By similarity)	M
	Core cluster	113_2|113-2GL008483 7653R|AID27920.1 MAFF303099|WP_010913422.1 USDA_110|WP_011083958.1 USDA205|WP_037391961.1 Sm2011|AGG73130.1	Protein of unknown function (DUF952)	S
	Dispensable cluster	113_2|113-2GL004060 USDA205|WP_037399415.1 USDA_110|WP_038967947.1 Sm2011|AGG72288.1 USDA_110|WP_038965423.1 113_2|113-2GL001789	Cupin 2, conserved barrel domain protein	S
	Core cluster	113_2|113-2GL004540 USDA205|WP_086018602.1 Sm2011|AGG74105.1 7653R|AID30541.2 MAFF303099|WP_044550554.1 USDA_110|WP_011087521.1	Segregation and condensation protein	S
	Core cluster	113_2|113-2GL002369 USDA205|WP_037395279.1 Sm2011|AGG73271.1 7653R|AID32297.1 MAFF303099|WP_010911318.1 USDA_110|WP_011089586.1	-	-
	Core cluster	113_2|113-2GL000171 USDA205|WP_037398340.1 Sm2011|AGG72721.1 7653R|AID27849.2 MAFF303099|WP_010913352.1 USDA_110|WP_011083494.1	Pilus assembly protein CpaB	U
	Core cluster	113_2|113-2GL004481 USDA205|WP_037400469.1 Sm2011|AGG74018.1 7653R|AID30127.1 MAFF303099|WP_010909520.1 USDA_110|WP_011087574.1	Preprotein translocase subunit SecG	U
	Core cluster	113_2|113-2GL000418 USDA205|WP_037393717.1 Sm2011|AGG75640.1 7653R|AID33306.1 MAFF303099|WP_010912332.1 USDA_110|WP_011083284.1	2-oxoglutarate dehydrogenase e1 component	C
	Dispensable cluster	113_2|113-2GL007717 MAFF303099|WP_010909675.1 USDA_110|WP_080584299.1 113_2|113-2GL005792 7653R|AID30308.1 USDA_110|WP_038966236.1	Inherit from COG: Membrane	M
	Core cluster	113_2|113-2GL005123 USDA205|WP_153452025.1 Sm2011|AGG74329.1 7653R|AID29636.1 MAFF303099|WP_010915732.1 USDA_110|WP_011087096.1	peptidase	M
	Core cluster	113_2|113-2GL000155 USDA205|WP_037397410.1 Sm2011|AGG72912.1 7653R|AID33617.2 MAFF303099|WP_010912678.1 USDA_110|WP_011083509.1	Catalyzes the decarboxylation of orotidine 5'- monophosphate (OMP) to uridine 5'-monophosphate (UMP) (By similarity)	F
	Core cluster	113_2|113-2GL004868 USDA205|WP_080579998.1 Sm2011|AGG74036.1 7653R|AID29987.2 MAFF303099|WP_044547560.1 USDA_110|WP_161537076.1	Catalyzes the synthesis of dihydrouridine, a modified base found in the D-loop of most tR-s (By similarity)	J
	Core cluster	113_2|113-2GL005422 USDA205|WP_014327817.1 Sm2011|AGG73704.1 7653R|AID29092.1 MAFF303099|WP_010915158.1 USDA_110|WP_011086837.1	Colicin v production protein	S
	Core cluster	113_2|113-2GL000132 USDA205|WP_037397262.1 Sm2011|AGG72866.1 7653R|AID33909.1 MAFF303099|WP_010912911.1 USDA_110|WP_011083531.1	Phenylalanyl-tR- synthetase, beta subunit	J
	Core cluster	Sm2011|AGG71729.1 USDA205|WP_080577561.1 7653R|AID32945.1 MAFF303099|WP_010911957.1 USDA_110|WP_028176066.1 113_2|113-2GL007972	amino acid ABC transporter	E
	Core cluster	113_2|113-2GL002390 USDA205|WP_080577419.1 Sm2011|AGG75098.1 USDA_110|WP_038965673.1 7653R|AID33215.2 MAFF303099|WP_010912239.1	oxidoreductase	C
	Core cluster	113_2|113-2GL003869 USDA205|WP_014328072.1 Sm2011|AGG73952.1 7653R|AID29914.2 MAFF303099|WP_032933400.1 USDA_110|WP_008136332.1	Located at the back of the 30S subunit body where it stabilizes the conformation of the head with respect to the body (By similarity)	J
	Core cluster	113_2|113-2GL000833 USDA205|WP_015633557.1 Sm2011|AGG70180.1 7653R|AID34364.2 MAFF303099|WP_010916090.1 USDA_110|WP_011082895.1	Protein of unknown function (DUF2493)	S
	Core cluster	113_2|113-2GL004427 USDA205|WP_014328199.1 Sm2011|AGG74080.1 7653R|AID30153.1 MAFF303099|WP_032930328.1 USDA_110|WP_011087622.1	Membrane-associated zinc metalloprotease	M
	Core cluster	113_2|113-2GL002123 USDA205|WP_037396106.1 7653R|AID30616.1 MAFF303099|WP_010909947.1 USDA_110|WP_038965516.1 Sm2011|AGG74623.1	tonb-dependent heme hemoglobin receptor family protein	P
	Core cluster	113_2|113-2GL001816 USDA205|WP_037396763.1 Sm2011|AGG74910.1 7653R|AID31892.1 MAFF303099|WP_044548240.1 USDA_110|WP_011090085.1	D- primase is the polymerase that synthesizes small R- primers for the Okazaki fragments on both template strands at replication forks during chromosomal D- synthesis (By similarity)	L
	Core cluster	113_2|113-2GL003016 USDA205|WP_014328424.1 Sm2011|AGG74139.1 7653R|AID30246.1 MAFF303099|WP_010909625.1 USDA_110|WP_011088912.1	Multiple antibiotic resistance (MarC)-related protein	U
	Core cluster	113_2|113-2GL001668 USDA205|WP_037399547.1 Sm2011|AGG73375.1 7653R|AID29391.1 MAFF303099|WP_010915466.1 USDA_110|WP_038967295.1	riboflavin biosynthesis protein ribF	H
	Core cluster	113_2|113-2GL004158 USDA205|WP_014328016.1 Sm2011|AGG73878.1 7653R|AID30332.2 MAFF303099|WP_010909700.1 USDA_110|WP_011087873.1	zinc-finger protein	S
	Core cluster	113_2|113-2GL002091 USDA205|WP_012709330.1 Sm2011|AGG75374.1 7653R|AID32941.1 MAFF303099|WP_010911953.1 USDA_110|WP_008131172.1	Protein of unknown function (DUF465)	S
	Core cluster	113_2|113-2GL002529 USDA205|WP_037394087.1 Sm2011|AGG75490.1 7653R|AID29360.1 MAFF303099|WP_044551663.1 USDA_110|WP_038967668.1	Transcriptional regulator	K
	Core cluster	113_2|113-2GL000797 USDA205|WP_014328325.1 Sm2011|AGG74249.1 7653R|AID31977.2 MAFF303099|WP_010911026.1 USDA_110|WP_011082929.1	Hemolysin	P
	Core cluster	113_2|113-2GL001147 USDA205|WP_037397312.1 Sm2011|AGG72882.1 7653R|AID28727.2 MAFF303099|WP_044551513.1 USDA_110|WP_011090664.1	Aminopeptidase	E
	Core cluster	113_2|113-2GL001449 USDA205|WP_037401343.1 USDA_110|WP_038967835.1 Sm2011|AGG75535.1 7653R|AID31979.1 MAFF303099|WP_010911028.1	ABC transporter	V
	Core cluster	113_2|113-2GL004371 USDA205|WP_014327997.1 Sm2011|AGG73859.1 7653R|AID30772.1 MAFF303099|WP_010910098.1 USDA_110|WP_011087671.1	NDH-1 shuttles electrons from -DH, via FMN and iron- sulfur (Fe-S) centers, to quinones in the respiratory chain. The immediate electron acceptor for the enzyme in this species is believed to be ubiquinone. Couples the redox reaction to proton translocation (for every two electrons transferred, four hydrogen ions are translocated across the cytoplasmic membrane), and thus conserves the redox ener…	C
	Core cluster	113_2|113-2GL002590 USDA205|WP_037395146.1 Sm2011|AGG73330.1 7653R|QGU20724.1 MAFF303099|WP_010910517.1 USDA_110|WP_011089381.1	-	-
	Core cluster	113_2|113-2GL004216 USDA205|WP_037391095.1 Sm2011|AGG73780.1 7653R|AID29495.2 MAFF303099|WP_010915560.1 USDA_110|WP_011087818.1	D- topoisomerase IV, subunit A	L
	Core cluster	113_2|113-2GL002577 USDA205|WP_037396982.1 Sm2011|AGG74782.1 USDA_110|WP_038966407.1 7653R|AID31941.1 MAFF303099|WP_010910988.1	transglycosylase	M
	Core cluster	113_2|113-2GL006908 USDA205|WP_037392660.1 Sm2011|AGG73461.1 7653R|AID28788.1 MAFF303099|WP_010914873.1 USDA_110|WP_011085438.1	histone deacetylase	B, Q
	Core cluster	113_2|113-2GL008484 USDA205|WP_014327211.1 Sm2011|AGG73108.1 7653R|AID27878.1 MAFF303099|WP_010913380.1 USDA_110|WP_011083957.1	Repressor	K
	Core cluster	113_2|113-2GL004560 USDA205|WP_080577354.1 Sm2011|AGG74119.1 7653R|AID30527.2 MAFF303099|WP_010909880.1 USDA_110|WP_011087501.1	Protein of unknown function (DUF498/DUF598)	S
	Core cluster	113_2|113-2GL006212 USDA205|WP_014330186.1 7653R|AID32991.1 MAFF303099|WP_010912001.1 USDA_110|WP_011086094.1 Sm2011|AGG75875.1	ABC transporter	E
	Core cluster	113_2|113-2GL003801 USDA205|WP_037435586.1 7653R|AID28936.1 MAFF303099|WP_010915011.1 USDA_110|WP_011088199.1 Sm2011|AGG72349.1	lysine exporter protein LysE YggA	E
	Core cluster	113_2|113-2GL002445 USDA205|WP_037430330.1 Sm2011|AGG70955.1 7653R|AID32421.1 MAFF303099|WP_010911436.1 USDA_110|WP_011089516.1	One of the components of the high-affinity ATP-driven potassium transport (or KDP) system, which catalyzes the hydrolysis of ATP coupled with the exchange of hydrogen and potassium ions. The C subunit may be involved in assembly of the KDP complex (By similarity)	P
	Core cluster	113_2|113-2GL006758 USDA205|WP_037391092.1 Sm2011|AGG73788.1 7653R|AID29528.1 MAFF303099|WP_032929885.1 USDA_110|WP_011085568.1	Peptidoglycan binding domain-containing protein	S
	Core cluster	113_2|113-2GL005414 USDA205|WP_037428508.1 Sm2011|AGG72408.1 7653R|AID31399.1 MAFF303099|WP_010910644.1 USDA_110|WP_011086845.1	Exodeoxyribonuclease III	L
	Core cluster	113_2|113-2GL000400 USDA205|WP_060563366.1 Sm2011|AGG75830.1 7653R|AID33330.1 MAFF303099|WP_010912357.1 USDA_110|WP_011083299.1	Required for the export of heme to the periplasm for the biogenesis of c-type cytochromes (By similarity)	O
	Core cluster	113_2|113-2GL005951 USDA205|WP_153451297.1 Sm2011|AGG71299.1 7653R|AID34124.2 MAFF303099|WP_010913109.1 USDA_110|WP_051000397.1	dihydroxyacetone kinase subunit DhaL	G
	Core cluster	113_2|113-2GL003852 USDA205|WP_014328064.1 Sm2011|AGG73935.1 7653R|AID29897.1 MAFF303099|WP_010909273.1 USDA_110|WP_011088151.1	One of the primary rR- binding proteins, it binds directly near the 3'-end of the 23S rR-, where it nucleates assembly of the 50S subunit (By similarity)	J
	Core cluster	113_2|113-2GL007039 USDA205|WP_037392674.1 Sm2011|AGG73446.1 7653R|AID28766.2 MAFF303099|WP_044551520.1 USDA_110|WP_011085356.1	sua5 ycio yrdc	J
	Core cluster	113_2|113-2GL000672 USDA205|WP_014329509.1 Sm2011|AGG75205.1 7653R|AID32642.2 MAFF303099|WP_010911671.1 USDA_110|WP_011083048.1	Aspartokinase	E
	Core cluster	113_2|113-2GL006910 USDA205|WP_037392662.1 Sm2011|AGG73458.1 7653R|AID28793.1 MAFF303099|WP_010914877.1 USDA_110|WP_028175335.1	Catalyzes the acyloin condensation reaction between C atoms 2 and 3 of pyruvate and glyceraldehyde 3-phosphate to yield 1-deoxy-D-xylulose-5-phosphate (DXP) (By similarity)	H
	Core cluster	113_2|113-2GL008717 USDA205|WP_037402686.1 Sm2011|AGG72511.1 7653R|AID33211.2 MAFF303099|WP_010912235.1 USDA_110|WP_011083747.1	Beta-ketoadipyl CoA thiolase	I
	Core cluster	113_2|113-2GL003870 USDA205|WP_003536508.1 Sm2011|AGG73953.1 USDA_110|WP_011088137.1 7653R|AID29915.1 MAFF303099|WP_006205449.1	50S ribosomal protein L30	J
	Dispensable cluster	113_2|113-2GL000966 USDA_110|WP_011090914.1 Sm2011|AGG72313.1 Sm2011|AGG71844.1 113_2|113-2GL000897 USDA_110|WP_063921588.1	R--directed D- polymerase	L
	Core cluster	113_2|113-2GL000074 USDA205|WP_014330814.1 Sm2011|AGG72938.1 7653R|AID32464.2 MAFF303099|WP_157866168.1 USDA_110|WP_011083582.1	Phosphopantothenoylcysteine decarboxylase	H
	Core cluster	113_2|113-2GL001353 USDA205|WP_037393790.1 Sm2011|AGG75777.1 7653R|AID33385.1 MAFF303099|WP_010912407.1 USDA_110|WP_011090486.1	endoribonuclease L-PSP	J
	Core cluster	113_2|113-2GL000437 USDA205|WP_014330097.1 Sm2011|AGG75764.1 7653R|AID33101.1 MAFF303099|WP_010912108.1 USDA_110|WP_011083266.1	protease	M
	Core cluster	113_2|113-2GL006255 USDA205|WP_037394055.1 Sm2011|AGG75510.1 7653R|AID30794.1 MAFF303099|WP_010910120.1 USDA_110|WP_011086051.1	precorrin-3B C17-methyltransferase	H
	Core cluster	113_2|113-2GL004324 USDA205|WP_014328344.1 Sm2011|AGG74222.1 7653R|AID29942.1 MAFF303099|WP_010909303.1 USDA_110|WP_038966309.1	carbohydrate kinase, YjeF related protein	G
	Core cluster	113_2|113-2GL003741 Sm2011|AGG69739.1 7653R|AID31022.1 MAFF303099|WP_010910291.1 USDA_110|WP_038967514.1 USDA205|WP_014328748.1	Glutathione-dependent formaldehyde-activating enzyme	S
	Core cluster	113_2|113-2GL008040 USDA205|WP_037393645.1 Sm2011|AGG75340.1 7653R|AID33028.1 MAFF303099|WP_010912034.1 USDA_110|WP_011084353.1	The RuvA-RuvB complex in the presence of ATP renatures cruciform structure in supercoiled D- with palindromic sequence, indicating that it may promote strand exchange reactions in homologous recombination. RuvAB is a helicase that mediates the Holliday junction migration by localized denaturation and reannealing (By similarity)	L
	Core cluster	113_2|113-2GL005357 USDA205|WP_014327849.1 Sm2011|AGG73745.1 7653R|AID29161.1 MAFF303099|WP_010915217.1 USDA_110|WP_011086893.1	Major role in the synthesis of nucleoside triphosphates other than ATP. The ATP gamma phosphate is transferred to the NDP beta phosphate via a ping-pong mechanism, using a phosphorylated active-site intermediate (By similarity)	F
	Core cluster	113_2|113-2GL001048 USDA205|WP_060563577.1 Sm2011|AGG72648.1 7653R|AID34134.1 MAFF303099|WP_010913119.1 USDA_110|WP_038968081.1	ATP-dependent helicase HrpB	L
	Core cluster	113_2|113-2GL002085 USDA205|WP_037393588.1 Sm2011|AGG75376.1 7653R|AID32953.1 MAFF303099|WP_010911966.1 USDA_110|WP_011089851.1	Catalyzes the conversion of N5-carboxyaminoimidazole ribonucleotide (N5-CAIR) to 4-carboxy-5-aminoimidazole ribonucleotide (CAIR) (By similarity)	F
	Core cluster	113_2|113-2GL000401 USDA205|WP_037435864.1 Sm2011|AGG75829.1 7653R|AID33331.1 MAFF303099|WP_010912358.1 USDA_110|WP_011083298.1	once thought to export heme, this seems not to be the case, but its exact role is uncertain. Responsible for energy coupling to the transport system (By similarity)	O
	Core cluster	113_2|113-2GL005498 USDA205|WP_037397349.1 Sm2011|AGG72894.1 7653R|AID28348.1 MAFF303099|WP_010914447.1 USDA_110|WP_038966922.1	Catalyzes the synthesis of GMP from XMP (By similarity)	F
	Core cluster	113_2|113-2GL000741 USDA205|WP_153451359.1 Sm2011|AGG72325.1 7653R|AID28267.1 MAFF303099|WP_010914369.1 USDA_110|WP_011082981.1	ubiquinol oxidase subunit ii	C
	Core cluster	113_2|113-2GL000262 USDA205|WP_014330349.1 Sm2011|AGG75922.1 7653R|AID33156.1 MAFF303099|WP_044548410.1 USDA_110|WP_038965110.1	heparinase II III family protein	S
	Core cluster	113_2|113-2GL000733 USDA205|WP_012709747.1 Sm2011|AGG75857.1 7653R|AID32988.1 MAFF303099|WP_008873823.1 USDA_110|WP_011082989.1	Ferredoxin	C
	Core cluster	113_2|113-2GL003858 USDA205|WP_014328067.1 Sm2011|AGG73941.1 7653R|AID29903.1 MAFF303099|WP_010909278.1 USDA_110|WP_011088146.1	Binds the lower part of the 30S subunit head. Binds mR- in the 70S ribosome, positioning it for translation (By similarity)	J
	Core cluster	113_2|113-2GL004366 USDA205|WP_012707628.1 Sm2011|AGG73854.1 7653R|AID30777.1 MAFF303099|WP_032930717.1 USDA_110|WP_026232873.1	NDH-1 shuttles electrons from -DH, via FMN and iron- sulfur (Fe-S) centers, to quinones in the respiratory chain. The immediate electron acceptor for the enzyme in this species is believed to be ubiquinone. Couples the redox reaction to proton translocation (for every two electrons transferred, four hydrogen ions are translocated across the cytoplasmic membrane), and thus conserves the redox ener…	C
	Core cluster	113_2|113-2GL003564 USDA205|WP_037392955.1 Sm2011|AGG74333.1 7653R|AID29709.1 MAFF303099|WP_010909120.1 USDA_110|WP_011088405.1	Molybdopterin	H
	Core cluster	113_2|113-2GL004759 USDA205|WP_014332127.1 Sm2011|AGG71709.1 7653R|AID32191.2 MAFF303099|WP_044548289.1 USDA_110|WP_011087344.1	response regulator	T
	Core cluster	113_2|113-2GL006099 USDA205|WP_037431936.1 Sm2011|AGG71209.1 7653R|AID29778.2 MAFF303099|WP_044550355.1 USDA_110|WP_011086203.1	Glyoxalase/Bleomycin resistance protein/Dioxygenase superfamily	E
	Core cluster	113_2|113-2GL003959 USDA205|WP_037391143.1 Sm2011|AGG73739.1 7653R|AID29573.1 MAFF303099|WP_044551713.1 USDA_110|WP_011088051.1	#NAME?	K
	Core cluster	113_2|113-2GL004209 USDA205|WP_012707403.1 Sm2011|AGG73649.1 7653R|AID29030.1 MAFF303099|WP_010915102.1 USDA_110|WP_011087824.1	Transfers the 4'-phosphopantetheine moiety from coenzyme A to a Ser of acyl-carrier-protein (By similarity)	I
	Core cluster	113_2|113-2GL007076 USDA205|WP_037392705.1 Sm2011|AGG73433.1 7653R|AID28762.1 MAFF303099|WP_010914845.1 USDA_110|WP_011085323.1	Glycyl-tR- synthetase beta subunit	J
	Core cluster	113_2|113-2GL000279 USDA205|WP_014330120.1 Sm2011|AGG75669.1 7653R|AID33245.1 MAFF303099|WP_010912270.1 USDA_110|WP_011083393.1	HemY domain protein	S
	Core cluster	113_2|113-2GL001070 USDA205|WP_037391801.1 Sm2011|AGG73005.1 7653R|AID33717.1 MAFF303099|WP_010912755.1 USDA_110|WP_011090828.1	Catalyzes the hydrolysis of N-succinyl-L,L- diaminopimelic acid (SDAP), forming succinate and LL-2,6- diaminoheptanedioate (DAP), an intermediate involved in the bacterial biosynthesis of lysine and meso-diaminopimelic acid, an essential component of bacterial cell walls (By similarity)	E
	Core cluster	113_2|113-2GL007091 7653R|AID28988.2 MAFF303099|WP_010915060.1 USDA_110|WP_011085310.1 USDA205|WP_014327738.1 Sm2011|AGG73610.1	Phage SPO1 D- polymerase-related protein	L
	Core cluster	113_2|113-2GL008526 USDA205|WP_014327203.1 Sm2011|AGG73099.1 7653R|AID27893.2 MAFF303099|WP_010913395.1 USDA_110|WP_011083919.1	Redox regulated molecular chaperone. Protects both thermally unfolding and oxidatively damaged proteins from irreversible aggregation. Plays an important role in the bacterial defense system toward oxidative stress (By similarity)	O
	Core cluster	113_2|113-2GL001887 USDA205|WP_037399502.1 Sm2011|AGG73402.1 7653R|AID33611.1 MAFF303099|WP_010912672.1 USDA_110|WP_011090022.1	Aldolase	G
	Core cluster	113_2|113-2GL003876 USDA205|WP_012707773.1 Sm2011|AGG73959.1 7653R|AID29921.1 MAFF303099|WP_006205443.1 USDA_110|WP_011088132.1	D--dependent R- polymerase catalyzes the transcription of D- into R- using the four ribonucleoside triphosphates as substrates (By similarity)	K
	Core cluster	113_2|113-2GL008335 USDA205|WP_014327291.1 Sm2011|AGG73194.1 7653R|AID27975.1 MAFF303099|WP_010914061.1 USDA_110|WP_011084077.1	Maf-like protein	D
	Core cluster	113_2|113-2GL007058 USDA205|WP_037391181.1 Sm2011|AGG73681.1 7653R|AID30733.2 MAFF303099|WP_044547924.1 USDA_110|WP_011085338.1	Tyrosine phosphatase protein	S
	Core cluster	113_2|113-2GL002463 USDA205|WP_014327380.1 Sm2011|AGG73284.1 7653R|AID28034.1 MAFF303099|WP_010914109.1 USDA_110|WP_011089499.1	glucose-6-phosphate 1-dehydrogenase	G
	Core cluster	113_2|113-2GL008162 USDA205|WP_037398717.1 Sm2011|AGG72803.1 7653R|AID34282.2 MAFF303099|WP_010913277.1 USDA_110|WP_011084239.1	Activates KDO (a required 8-carbon sugar) for incorporation into bacterial lipopolysaccharide in Gram-negative bacteria (By similarity)	M
	Core cluster	113_2|113-2GL005103 USDA205|WP_014328407.1 Sm2011|AGG74317.1 7653R|AID29653.2 MAFF303099|WP_080512014.1 USDA_110|WP_011087113.1	feS assembly protein SufD	O
	Core cluster	113_2|113-2GL000361 USDA205|WP_037398635.1 Sm2011|AGG75909.1 7653R|AID33383.1 MAFF303099|WP_010912405.1 USDA_110|WP_011083334.1	Catalyzes the oxidation of 3-carboxy-2-hydroxy-4- methylpentanoate (3-isopropylmalate) to 3-carboxy-4-methyl-2- oxopentanoate. The product decarboxylates to 4-methyl-2 oxopentanoate (By similarity)	E
	Core cluster	113_2|113-2GL007876 USDA205|WP_014857655.1 Sm2011|AGG70129.1 7653R|AID34807.2 MAFF303099|WP_006333856.1 USDA_110|WP_011084584.1	Ferredoxin like protein, fixX	C
	Core cluster	113_2|113-2GL005156 USDA205|WP_037401524.1 Sm2011|AGG73902.1 7653R|AID29808.1 MAFF303099|WP_010909211.1 USDA_110|WP_011087067.1	DSBA Oxidoreductase	Q
	Dispensable cluster	113_2|113-2GL005714 7653R|QGU20739.1 MAFF303099|WP_010910149.1 USDA_110|WP_011086584.1 7653R|QGU20938.1 7653R|QGU20982.1	Transport of potassium into the cell (By similarity)	P
	Core cluster	113_2|113-2GL002386 USDA205|WP_037428599.1 Sm2011|AGG71428.1 7653R|AID28284.1 MAFF303099|WP_010914385.1 USDA_110|WP_011089569.1	Catalyzes the dehydration of D-mannonate (By similarity)	G
	Core cluster	113_2|113-2GL001616 USDA205|WP_153451759.1 Sm2011|AGG73362.1 7653R|AID28324.2 MAFF303099|WP_010914426.1 USDA_110|WP_038967312.1	ErfK YbiS YcfS YnhG	S
	Core cluster	113_2|113-2GL003560 USDA205|WP_037392946.1 Sm2011|AGG74337.1 7653R|AID29705.2 MAFF303099|WP_010909116.1 USDA_110|WP_011088409.1	ATPase associated with various cellular activities, AAA_5	S
	Core cluster	113_2|113-2GL002734 USDA205|WP_014328911.1 Sm2011|AGG74714.1 7653R|AID30898.1 MAFF303099|WP_010910180.1 USDA_110|WP_011089250.1	Key enzyme in folate metabolism. Catalyzes an essential reaction for de novo glycine and purine synthesis, and for D- precursor synthesis (By similarity)	H
	Core cluster	113_2|113-2GL000667 USDA205|WP_037394662.1 Sm2011|AGG75255.1 7653R|AID32732.1 MAFF303099|WP_010911759.1 USDA_110|WP_011083053.1	Methyltransferase, type 11	S
	Core cluster	113_2|113-2GL003711 USDA205|WP_014328121.1 Sm2011|AGG74001.1 USDA_110|WP_011088273.1 7653R|AID30396.2 MAFF303099|WP_032930477.1	Could be involved in insertion of integral membrane proteins into the membrane (By similarity)	S
	Core cluster	113_2|113-2GL008102 USDA205|WP_060564113.1 Sm2011|AGG74048.1 7653R|AID32524.1 MAFF303099|WP_010911516.1 USDA_110|WP_011084293.1	Multifunctional enzyme that catalyzes the SAM-dependent methylation of uroporphyrinogen III at position C-2 and C-7 to form precorrin-2 and then position C-12 or C-18 to form trimethylpyrrocorphin 2. It also catalyzes the conversion of precorrin-2 into siroheme. This reaction consists of the -D- dependent oxidation of precorrin-2 into sirohydrochlorin and its subsequent ferrochelation into sirohe…	H
	Core cluster	113_2|113-2GL006395 USDA205|WP_037391265.1 Sm2011|AGG73603.1 7653R|AID28980.2 MAFF303099|WP_010915054.1 USDA_110|WP_011085917.1	Adenylation and deadenylation of glutamate--ammonia ligase (By similarity)	O, T
	Core cluster	113_2|113-2GL002628 USDA205|WP_012708634.1 Sm2011|AGG74767.1 7653R|AID30982.1 MAFF303099|WP_010910255.1 USDA_110|WP_011089343.1	cell division protein	D
	Dispensable cluster	113_2|113-2GL002518 Sm2011|AGG75711.1 7653R|AID28590.1 MAFF303099|WP_010913928.1 USDA_110|WP_038967671.1 MAFF303099|WP_010914698.1	ABC transporter	E, P
	Core cluster	113_2|113-2GL002330 USDA205|WP_014327334.1 Sm2011|AGG73237.1 7653R|AID32240.1 MAFF303099|WP_010911271.1 USDA_110|WP_011089623.1	Flagellum-specific ATP synthase	N, U
	Core cluster	113_2|113-2GL004545 USDA205|WP_037393416.1 Sm2011|AGG74111.1 7653R|AID30536.1 MAFF303099|WP_010909889.1 USDA_110|WP_011087516.1	Catalyzes the attachment of serine to tR-(Ser). Is also able to aminoacylate tR-(Sec) with serine, to form the misacylated tR- L-seryl-tR-(Sec), which will be further converted into selenocysteinyl-tR-(Sec) (By similarity)	J
	Core cluster	113_2|113-2GL008389 USDA205|WP_037391675.1 Sm2011|AGG71848.1 7653R|AID33844.1 MAFF303099|WP_010912849.1 USDA_110|WP_011084045.1	phosphonate metabolism protein PhnM	P
	Core cluster	113_2|113-2GL002089 USDA205|WP_034855051.1 Sm2011|AGG75375.1 7653R|AID32942.1 MAFF303099|WP_010911954.1 USDA_110|WP_011089847.1	Protein of unknown function (DUF465)	S
	Core cluster	113_2|113-2GL001660 USDA205|WP_014330414.1 Sm2011|AGG72627.1 7653R|AID33944.1 MAFF303099|WP_010912944.1 USDA_110|WP_011090218.1	class I peptide chain release factor	J
	Core cluster	113_2|113-2GL000740 USDA205|WP_060563692.1 Sm2011|AGG72326.1 7653R|AID28268.1 MAFF303099|WP_010914370.1 USDA_110|WP_011082982.1	oxidase, subunit i	C
	Core cluster	113_2|113-2GL005354 USDA205|WP_086018579.1 Sm2011|AGG73768.1 7653R|AID29315.1 MAFF303099|WP_044550119.1 USDA_110|WP_011086896.1	Catalyzes the reversible transfer of the terminal phosphate of ATP to form a long-chain polyphosphate (polyP) (By similarity)	P
	Core cluster	113_2|113-2GL000169 USDA205|WP_014330765.1 Sm2011|AGG72917.1 7653R|AID33563.1 MAFF303099|WP_010912584.1 USDA_110|WP_011083496.1	UPF0102 protein	L
	Core cluster	113_2|113-2GL001731 USDA205|WP_014329249.1 Sm2011|AGG75014.1 7653R|AID30619.1 MAFF303099|WP_010909951.1 USDA_110|WP_008544592.1	Antibiotic biosynthesis monooxygenase	S
	Dispensable cluster	113_2|113-2GL001098 USDA205|WP_014857942.1 Sm2011|AGG70293.1 7653R|AID31749.1 USDA_110|WP_011090710.1 USDA205|WP_014857912.1	ABC transporter permease protein	V
	Core cluster	113_2|113-2GL008337 USDA205|WP_014327288.1 Sm2011|AGG73191.1 7653R|AID27978.1 MAFF303099|WP_010914063.1 USDA_110|WP_011084075.1	UPF0262 protein	T
	Core cluster	113_2|113-2GL000238 Sm2011|AGG72020.1 USDA_110|WP_038965114.1 USDA205|WP_037395746.1 7653R|AID34069.2 MAFF303099|WP_010913056.1	Transcriptional regulator	K
	Core cluster	113_2|113-2GL000009 USDA205|WP_012706806.1 Sm2011|AGG73188.1 7653R|AID27981.1 USDA_110|WP_011083644.1 MAFF303099|WP_010914066.1	Cell wall formation. Adds enolpyruvyl to UDP-N- acetylglucosamine (By similarity)	M
	Core cluster	113_2|113-2GL000219 USDA205|WP_037393766.1 Sm2011|AGG75802.1 7653R|AID33258.2 MAFF303099|WP_044551021.1 USDA_110|WP_038965122.1	ErfK YbiS YcfS YnhG family protein	S
	Core cluster	113_2|113-2GL007648 USDA205|WP_015633485.1 7653R|QGU21231.1 USDA_110|WP_011084828.1 Sm2011|AGG70154.1 MAFF303099|WP_010913823.1	Part of the ABC transporter complex NodIJ involved in the export of the nodulation factors (Nod factors), the bacterial signal molecules that induce symbiosis and subsequent nodulation induction. Nod factors are LCO (lipo-chitin oligosaccharide), a modified beta-1,4-linked N-acetylglucosamine oligosaccharide. This subunit encodes the transporter (By similarity)	H
	Core cluster	113_2|113-2GL004785 USDA205|WP_014327256.1 Sm2011|AGG73159.1 7653R|AID33743.1 MAFF303099|WP_010912780.1 USDA_110|WP_011087320.1	pyrazinamidase, nicotinamidase	H
	Core cluster	113_2|113-2GL008062 USDA205|WP_037393597.1 Sm2011|AGG75370.1 7653R|AID33041.1 MAFF303099|WP_010912047.1 USDA_110|WP_011084334.1	Sel1 domain protein repeat-containing protein	S
	Core cluster	113_2|113-2GL000183 USDA205|WP_014330418.1 Sm2011|AGG72631.1 7653R|AID33876.1 USDA_110|WP_011083482.1 MAFF303099|WP_010912882.1	Phosphoribosyl-ATP pyrophosphatase	E
	Core cluster	113_2|113-2GL002092 USDA205|WP_037398410.1 Sm2011|AGG71099.1 7653R|AID33629.1 MAFF303099|WP_010912689.1 USDA_110|WP_011089845.1	fad dependent oxidoreductase	C
	Core cluster	113_2|113-2GL008502 USDA205|WP_037397782.1 Sm2011|AGG72061.1 7653R|AID31095.1 MAFF303099|WP_032930886.1 USDA_110|WP_038965265.1	ABC transporter	G
	Core cluster	113_2|113-2GL002724 USDA205|WP_014328916.1 Sm2011|AGG74724.1 7653R|AID30923.1 MAFF303099|WP_010910195.1 USDA_110|WP_011089261.1	arylsulfate sulfotransferase-like protein	S
	Core cluster	113_2|113-2GL001522 USDA205|WP_037394452.1 Sm2011|AGG75046.1 7653R|AID31042.1 MAFF303099|WP_010910312.1 USDA_110|WP_011090342.1	Dihydropyrimidinase	F
	Core cluster	113_2|113-2GL007204 USDA205|WP_060563672.1 Sm2011|AGG71333.1 7653R|QGU20909.1 MAFF303099|WP_032929285.1 USDA_110|WP_011085211.1	Transcriptional regulator tetR family	K
	Dispensable cluster	USDA205|WP_060563788.1 USDA205|WP_014329112.1 USDA205|WP_037437137.1 7653R|AID33097.2 Sm2011|AGG72847.1 MAFF303099|WP_010912104.1	Necessary for efficient R- polymerase transcription elongation past template-encoded arresting sites. The arresting sites in D- have the property of trapping a certain fraction of elongating R- polymerases that pass through, resulting in locked ternary complexes. Cleavage of the nascent transcript by cleavage factors such as GreA or GreB allows the resumption of elongation from the new 3'terminus…	K
	Uniq cluster	USDA205|WP_080577236.1 USDA205|WP_080577615.1 USDA205|WP_080579102.1 USDA205|WP_080589559.1 USDA205|WP_109023308.1 USDA205|WP_141322123.1	-	-
	Dispensable cluster	USDA205|WP_153451453.1 USDA205|WP_050984061.1 7653R|AID31928.1 MAFF303099|WP_010910978.1 USDA_110|WP_011088894.1 113_2|113-2GL003035	deaminase	F, J
	Dispensable cluster	USDA205|WP_037430364.1 USDA205|WP_014329191.1 Sm2011|AGG71802.1 Sm2011|AGG72144.1 7653R|AID33979.1 MAFF303099|WP_044551110.1	Xanthine dehydrogenase	F
	Dispensable cluster	USDA205|WP_037395621.1 USDA205|WP_037395823.1 7653R|AID33670.1 MAFF303099|WP_010914477.1 USDA_110|WP_038967378.1 113_2|113-2GL007231	gamma-glutamyltranspeptidase EC 2.3.2.2	E
	Uniq cluster	USDA205|WP_141321956.1 USDA205|WP_014327424.1 USDA205|WP_037397185.1 USDA205|WP_037400800.1 USDA205|WP_060563239.1 USDA205|WP_060563260.1	Hemolysin-type calcium-binding	O
	Dispensable cluster	USDA205|WP_037436772.1 USDA205|WP_037436774.1 USDA_110|WP_038967362.1 113_2|113-2GL001568 USDA205|WP_050994683.1 MAFF303099|WP_010911554.1	Glycosyl Transferase	M
	Uniq cluster	USDA205|WP_086018634.1 USDA205|WP_100209385.1 USDA205|WP_153451383.1 USDA205|WP_153451892.1 USDA205|WP_153452004.1 USDA205|WP_153452023.1	-	-
	Uniq cluster	USDA205|WP_080579109.1 USDA205|WP_080577789.1 USDA205|WP_080580012.1 USDA205|WP_153451648.1 USDA205|WP_153452021.1 USDA205|WP_080577312.1	-	-
	Dispensable cluster	USDA205|WP_037403195.1 USDA205|WP_014330046.1 MAFF303099|WP_010912325.1 USDA_110|WP_011083642.1 113_2|113-2GL000013 7653R|QGU20727.1	Protein of unknown function (DUF2867)	S
	Dispensable cluster	USDA205|WP_037436481.1 USDA205|WP_078070602.1 USDA205|WP_014331518.1 Sm2011|AGG72067.1 7653R|QGU20855.1 MAFF303099|WP_010915614.1	transcriptional regulator	K
	Dispensable cluster	Sm2011|AGG75185.1 Sm2011|AGG75183.1 USDA_110|WP_011085661.1 113_2|113-2GL006663 Sm2011|AGG69850.1 7653R|AID28681.1	extracellular solute-binding protein	E
	Dispensable cluster	Sm2011|AGG69892.1 Sm2011|AGG70692.1 USDA205|WP_080577514.1 USDA_110|WP_011089695.1 113_2|113-2GL005193 USDA_110|WP_063921457.1	Amidohydrolase family	S
	Dispensable cluster	Sm2011|AGG75158.1 Sm2011|AGG72155.1 USDA_110|WP_028173320.1 113_2|113-2GL003426 7653R|AID32772.1 MAFF303099|WP_032931897.1	Periplasmic binding proteins and sugar binding domain of LacI family	G
	Dispensable cluster	Sm2011|AGG74812.1 Sm2011|AGG70655.1 USDA205|WP_037432835.1 USDA_110|WP_038966772.1 113_2|113-2GL002905 MAFF303099|WP_010913790.1	Transcriptional regulator	K
	Dispensable cluster	Sm2011|AGG74762.1 Sm2011|AGG70018.1 7653R|AID28343.1 MAFF303099|WP_010914441.1 USDA_110|WP_011089853.1 113_2|113-2GL002083	Channel that permits osmotically driven movement of water in both directions. It is involved in the osmoregulation and in the maintenance of cell turgor during volume expansion in rapidly growing cells. It mediates rapid entry or exit of water in response to abrupt changes in osmolarity (By similarity)	M
	Dispensable cluster	Sm2011|AGG70349.1 Sm2011|AGG70099.1 USDA205|WP_080577493.1 7653R|AID28189.1 MAFF303099|WP_010914032.1 MAFF303099|WP_010914196.1	Cbb3-type cytochrome oxidase	C
	Dispensable cluster	Sm2011|AGG73003.1 Sm2011|AGG72481.1 Sm2011|AGG72558.1 Sm2011|AGG72596.1 Sm2011|AGG73002.1 MAFF303099|WP_157866005.1	Transposase	L
	Dispensable cluster	Sm2011|AGG74191.1 Sm2011|AGG74380.1 Sm2011|AGG74381.1 Sm2011|AGG70005.1 USDA205|WP_080579314.1 MAFF303099|WP_010913256.1	Protein of unknown function (DUF1254)	S
	Uniq cluster	Sm2011|AGG75874.1 Sm2011|AGG71407.1 Sm2011|AGG73736.1 Sm2011|AGG73737.1 Sm2011|AGG74739.1 Sm2011|AGG75868.1	Transposase	L
	Dispensable cluster	Sm2011|AGG75165.1 7653R|AID29192.1 MAFF303099|WP_010915241.1 USDA_110|WP_011089227.1 MAFF303099|WP_010914470.1 113_2|113-2GL002759	transport system, permease ABC transporter protein	P
	Uniq cluster	Sm2011|AGG73635.1 Sm2011|AGG71295.1 Sm2011|AGG72483.1 Sm2011|AGG73175.1 Sm2011|AGG75591.1 Sm2011|AGG71640.1	-	-
	Dispensable cluster	Sm2011|AGG71139.1 Sm2011|AGG70474.1 Sm2011|AGG71109.1 USDA205|WP_037399966.1 USDA_110|WP_038965309.1 113_2|113-2GL008408	ABC transporter	S
	Dispensable cluster	Sm2011|AGG75700.1 Sm2011|AGG75725.1 MAFF303099|WP_010915853.1 USDA_110|WP_011084703.1 113_2|113-2GL007940 113_2|113-2GL000896	Integrase Core cluster domain	L
	Core cluster	USDA205|WP_037391133.1 Sm2011|AGG73744.1 7653R|AID29163.1 MAFF303099|WP_010915218.1 USDA_110|WP_038967273.1 113_2|113-2GL001727	Glutathione S-Transferase	O
	Core cluster	USDA205|WP_010970356.1 Sm2011|AGG75606.1 7653R|AID30215.1 MAFF303099|WP_010909598.1 USDA_110|WP_011085227.1 113_2|113-2GL007187	Binding-protein-dependent transport systems inner membrane component	G
	Core cluster	USDA205|WP_153451258.1 Sm2011|AGG75366.1 7653R|AID33050.2 MAFF303099|WP_010912059.1 USDA_110|WP_028173455.1 113_2|113-2GL008072	ABC transporter	V
	Core cluster	USDA205|WP_037400430.1 Sm2011|AGG74005.1 7653R|AID30391.2 MAFF303099|WP_010909753.1 USDA_110|WP_011088297.1 113_2|113-2GL003687	-	-
	Core cluster	USDA205|WP_037396660.1 Sm2011|AGG74445.1 7653R|AID30067.1 MAFF303099|WP_010909461.1 USDA_110|WP_011084047.1 113_2|113-2GL008387	pyridoxamine 5-phosphate	S
	Core cluster	USDA205|WP_037394132.1 Sm2011|AGG75485.1 7653R|AID28701.1 MAFF303099|WP_010914791.1 USDA_110|WP_011086178.1 113_2|113-2GL006125	Transcriptional regulator	K
	Core cluster	USDA205|WP_037401220.1 Sm2011|AGG73358.1 7653R|AID28319.2 MAFF303099|WP_044549468.1 USDA_110|WP_011090275.1 113_2|113-2GL001600	Glycolate oxidase subunit	C
	Core cluster	USDA205|WP_014328447.1 Sm2011|AGG74165.1 7653R|AID30233.1 MAFF303099|WP_010909615.1 USDA_110|WP_011087459.1 113_2|113-2GL004625	PPIases accelerate the folding of proteins (By similarity)	O
	Core cluster	USDA205|WP_012709859.1 Sm2011|AGG72614.1 7653R|AID33931.1 MAFF303099|WP_010912931.1 USDA_110|WP_007598398.1 113_2|113-2GL000082	Thioredoxin	O
	Core cluster	USDA205|WP_014329550.1 Sm2011|AGG75249.1 7653R|AID32715.2 MAFF303099|WP_010911741.1 USDA_110|WP_011084209.1 113_2|113-2GL008198	DUF218 domain	S
	Core cluster	USDA205|WP_037430521.1 Sm2011|AGG71853.1 7653R|AID32578.1 MAFF303099|WP_010911607.1 USDA_110|WP_011090670.1 113_2|113-2GL001140	Phosphonate ABC transporter, ATP-binding protein	P
	Core cluster	USDA205|WP_060563626.1 Sm2011|AGG74274.1 7653R|AID28911.1 MAFF303099|WP_044551555.1 USDA_110|WP_011086701.1 113_2|113-2GL005565	thiolase	I
	Core cluster	USDA205|WP_037398288.1 Sm2011|AGG72748.1 7653R|AID31836.1 MAFF303099|WP_010910908.1 USDA_110|WP_063921410.1 113_2|113-2GL007238	Transcriptional regulator, TetR family	K
	Core cluster	USDA205|WP_014330094.1 Sm2011|AGG75761.1 7653R|AID33105.1 MAFF303099|WP_010912111.1 USDA_110|WP_027523570.1 113_2|113-2GL000440	Functions as a ribosomal silencing factor. Interacts with ribosomal protein L14 (rplN), blocking formation of intersubunit bridge B8. Prevents association of the 30S and 50S ribosomal subunits and the formation of functional ribosomes, thus repressing translation (By similarity)	S
	Dispensable cluster	USDA205|WP_014857925.1 Sm2011|AGG70306.1 MAFF303099|WP_010914169.1 USDA205|WP_014857927.1 Sm2011|AGG70307.1 7653R|AID31751.1	Universal stress protein	T
	Core cluster	USDA205|WP_014328152.1 Sm2011|AGG74031.1 7653R|AID29984.1 MAFF303099|WP_010909338.1 USDA_110|WP_011087249.1 113_2|113-2GL004879	Catalyzes the radical-mediated insertion of two sulfur atoms into the C-6 and C-8 positions of the octanoyl moiety bound to the lipoyl domains of lipoate-dependent enzymes, thereby converting the octanoylated domains into lipoylated derivatives (By similarity)	H
	Core cluster	USDA205|WP_037399600.1 Sm2011|AGG73376.1 7653R|AID29396.1 MAFF303099|WP_010915472.1 USDA_110|WP_011090213.1 113_2|113-2GL001666	amino acids such as valine, to avoid such errors it has two additional distinct tR-(Ile)-dependent editing activities. One activity is designated as 'pretransfer' editing and involves the hydrolysis of activated Val-AMP. The other activity is designated 'posttransfer' editing and involves deacylation of mischarged Val-tR-(Ile) (By similarity)	J
	Core cluster	USDA205|WP_037432416.1 Sm2011|AGG71041.1 7653R|AID30600.1 MAFF303099|WP_044547845.1 USDA_110|WP_011083235.1 113_2|113-2GL000469	EamA-like transporter family	E, G
	Core cluster	USDA205|WP_037401899.1 Sm2011|AGG74256.1 7653R|AID30044.1 MAFF303099|WP_010909436.1 USDA_110|WP_028173978.1 113_2|113-2GL004746	Phosphatidylcholine synthase	I
	Core cluster	USDA205|WP_014327895.1 Sm2011|AGG73790.1 7653R|AID29534.2 MAFF303099|WP_010915593.1 USDA_110|WP_011087793.1 113_2|113-2GL004245	Negatively regulates transcription of bacterial ribonucleotide reductase nrd genes and operons by binding to NrdR- boxes (By similarity)	K
	Core cluster	USDA205|WP_037394629.1 Sm2011|AGG75273.1 7653R|AID32754.1 MAFF303099|WP_010911784.1 USDA_110|WP_011083022.1 113_2|113-2GL000698	Site-specific tyrosine recombinase, which acts by catalyzing the cutting and rejoining of the recombining D- molecules. The XerC-XerD complex is essential to convert dimers of the bacterial chromosome into monomers to permit their segregation at cell division. It also contributes to the segregational stability of plasmids (By similarity)	L
	Core cluster	USDA205|WP_037392664.1 Sm2011|AGG73453.1 7653R|AID28775.1 MAFF303099|WP_010914858.1 USDA_110|WP_011085442.1 113_2|113-2GL006902	acyl-CoA dehydrogenase	I
	Core cluster	USDA205|WP_037398498.1 Sm2011|AGG73334.1 7653R|AID34219.2 MAFF303099|WP_010913201.1 USDA_110|WP_011087813.1 113_2|113-2GL004222	chromate transporter	P
	Core cluster	USDA205|WP_037400610.1 Sm2011|AGG74464.1 7653R|AID30082.1 MAFF303099|WP_006205209.1 USDA_110|WP_011090847.1 113_2|113-2GL001051	transcriptional regulator AsnC family	K
	Dispensable cluster	USDA205|WP_037399997.1 Sm2011|AGG70664.1 MAFF303099|WP_052292097.1 USDA205|WP_037401401.1 7653R|AID28519.1 MAFF303099|WP_080512120.1	Aminotransferase	E
	Core cluster	USDA205|WP_037435149.1 Sm2011|AGG71864.1 7653R|AID31301.1 MAFF303099|WP_010910544.1 USDA_110|WP_038966607.1 113_2|113-2GL007281	acyltransferase 3	I
	Dispensable cluster	USDA205|WP_037402220.1 113_2|113-2GL008573 USDA205|WP_037395842.1 Sm2011|AGG71038.1 USDA_110|WP_011089131.1 USDA_110|WP_011083879.1	shikimate 5-dehydrogenase	E
	Core cluster	USDA205|WP_153451660.1 Sm2011|AGG75381.1 7653R|AID32961.2 MAFF303099|WP_044548379.1 USDA_110|WP_011089872.1 113_2|113-2GL002062	Protein of unknown function (DUF1036)	S
	Core cluster	USDA205|WP_014329508.1 Sm2011|AGG75204.1 7653R|AID32641.2 MAFF303099|WP_010911670.1 USDA_110|WP_011083049.1 113_2|113-2GL000671	phosphoenolpyruvate-protein phosphotransferase	T
	Core cluster	USDA205|WP_014328021.1 Sm2011|AGG73883.1 7653R|AID30192.1 MAFF303099|WP_010909583.1 USDA_110|WP_028171586.1 113_2|113-2GL004172	dihydroorotase	F
	Core cluster	USDA205|WP_037393430.1 Sm2011|AGG74101.1 7653R|AID30546.2 MAFF303099|WP_010909898.1 USDA_110|WP_063921471.1 113_2|113-2GL004535	deoxyguanosinetriphosphate triphosphohydrolase-like protein	F
	Core cluster	USDA205|WP_060563370.1 Sm2011|AGG75672.1 7653R|AID33241.1 MAFF303099|WP_010912266.1 USDA_110|WP_038967768.1 113_2|113-2GL003607	Major facilitator superfamily	G
	Core cluster	USDA205|WP_037396602.1 Sm2011|AGG74412.1 7653R|AID32098.1 MAFF303099|WP_044548276.1 USDA_110|WP_028175030.1 113_2|113-2GL007138	Key enzyme in heme biosynthesis. Catalyzes the oxidative decarboxylation of propionic acid side chains of rings A and B of coproporphyrinogen III (By similarity)	H
	Core cluster	USDA205|WP_080577551.1 Sm2011|AGG72204.1 USDA_110|WP_028174242.1 113_2|113-2GL007410 7653R|AID32874.1 MAFF303099|WP_010911895.1	ROK family	K
	Dispensable cluster	USDA205|WP_141322177.1 Sm2011|AGG70189.1 MAFF303099|WP_010911559.1 USDA_110|WP_038966489.1 113_2|113-2GL002775 Sm2011|AGG70020.1	mechanosensitive ion channel	M
	Core cluster	USDA205|WP_037428335.1 Sm2011|AGG72498.1 7653R|AID28553.1 MAFF303099|WP_010914669.1 USDA_110|WP_011085122.1 113_2|113-2GL007314	protocatechuate 3,4-dioxygenase, alpha	Q
	Core cluster	USDA205|WP_037396557.1 Sm2011|AGG74401.1 7653R|AID30294.2 MAFF303099|WP_010909665.1 USDA_110|WP_011088628.1 113_2|113-2GL003318	Inherit from NOG: KH domain containing 3-like, subcortical maternal complex member	S
	Core cluster	USDA205|WP_037393622.1 Sm2011|AGG75353.1 7653R|AID32898.2 MAFF303099|WP_032931981.1 USDA_110|WP_063921605.1 113_2|113-2GL008055	Transketolase (EC 2.2.1.1)	G
	Core cluster	USDA205|WP_037399637.1 Sm2011|AGG72982.1 7653R|AID34309.1 MAFF303099|WP_010913304.1 USDA_110|WP_011083621.1 113_2|113-2GL000034	Peptidase M22 Glycoprotease	O
	Core cluster	USDA205|WP_037398722.1 Sm2011|AGG72809.1 7653R|AID34286.1 MAFF303099|WP_010913281.1 USDA_110|WP_038966071.1 113_2|113-2GL001054	Histidine triad (HIT) protein	F, G
	Core cluster	USDA205|WP_014327364.1 Sm2011|AGG73269.1 7653R|AID32295.1 MAFF303099|WP_010911316.1 USDA_110|WP_028175235.1 113_2|113-2GL002367	flagellar protein	S
	Core cluster	USDA205|WP_037435755.1 Sm2011|AGG72508.1 7653R|AID33214.1 MAFF303099|WP_010912238.1 USDA_110|WP_011083891.1 113_2|113-2GL008558	Transcriptional regulator	K
	Core cluster	USDA205|WP_014328363.1 Sm2011|AGG74203.1 7653R|AID29950.2 MAFF303099|WP_010909309.1 USDA_110|WP_011087225.1 113_2|113-2GL004904	Cysteine synthase	E
	Core cluster	USDA205|WP_014329402.1 Sm2011|AGG70865.1 7653R|QGU20755.1 MAFF303099|WP_010910076.1 USDA_110|WP_011088780.1 113_2|113-2GL003162	serine-glyoxylate aminotransferase	E
	Core cluster	USDA205|WP_037398676.1 Sm2011|AGG75928.1 7653R|AID34116.1 MAFF303099|WP_044548801.1 USDA_110|WP_011084127.1 113_2|113-2GL008292	AmP-dependent synthetase and ligase	I
	Core cluster	USDA205|WP_037391267.1 Sm2011|AGG73601.1 7653R|AID28978.2 MAFF303099|WP_027046649.1 USDA_110|WP_038965709.1 113_2|113-2GL006397	Two component transcriptional regulator, winged helix family	T
	Core cluster	USDA205|WP_037434945.1 Sm2011|AGG72524.1 7653R|AID30264.1 MAFF303099|WP_010909639.1 USDA_110|WP_011084267.1 113_2|113-2GL008130	ABC transporter permease protein	E
	Core cluster	USDA205|WP_050984020.1 Sm2011|AGG75760.1 7653R|AID33108.1 MAFF303099|WP_162034373.1 USDA_110|WP_038965055.1 113_2|113-2GL000441	Catalyzes the reversible adenylation of nicotinate mononucleotide (NaMN) to nicotinic acid adenine dinucleotide (NaAD) (By similarity)	H
	Core cluster	USDA205|WP_014330421.1 Sm2011|AGG72634.1 7653R|AID33872.1 MAFF303099|WP_010912877.1 USDA_110|WP_011083479.1 113_2|113-2GL000187	IGPS catalyzes the conversion of PRFAR and glutamine to IGP, AICAR and glutamate. The HisH subunit provides the glutamine amidotransferase activity that produces the ammonia necessary to HisF for the synthesis of IGP and AICAR (By similarity)	E
	Core cluster	USDA205|WP_037434511.1 Sm2011|AGG71404.1 7653R|AID32696.1 MAFF303099|WP_010911721.1 USDA_110|WP_011083556.1 113_2|113-2GL000105	Sn-glycerol-3-phosphate transport system permease protein	P
	Core cluster	USDA205|WP_014329529.1 Sm2011|AGG75226.1 7653R|AID32675.1 MAFF303099|WP_010911701.1 USDA_110|WP_011084158.1 113_2|113-2GL008255	disulfide bond formation protein	O
	Core cluster	USDA205|WP_037396997.1 Sm2011|AGG74795.1 7653R|AID31031.1 MAFF303099|WP_010910301.1 USDA_110|WP_011089552.1 113_2|113-2GL002403	Acetolactate synthase	E
	Core cluster	USDA205|WP_014330409.1 Sm2011|AGG72622.1 7653R|AID33939.1 MAFF303099|WP_010912939.1 USDA_110|WP_011090868.1 113_2|113-2GL001028	PTS system fructose subfamily IIA component	G
	Core cluster	USDA205|WP_014330538.1 Sm2011|AGG72750.1 7653R|AID34157.1 MAFF303099|WP_032932780.1 USDA_110|WP_011083626.1 113_2|113-2GL000028	pfkb domain protein	G
	Core cluster	USDA205|WP_012709376.1 Sm2011|AGG75416.1 7653R|AID32355.1 MAFF303099|WP_010911372.1 USDA_110|WP_007597092.1 113_2|113-2GL001385	response regulator	T
	Core cluster	USDA205|WP_014328270.1 Sm2011|AGG74311.1 7653R|AID30492.1 MAFF303099|WP_010909784.1 USDA_110|WP_011090891.1 113_2|113-2GL001004	Removes the N-terminal methionine from nascent proteins (By similarity)	J
	Core cluster	USDA205|WP_037436470.1 Sm2011|AGG72878.1 7653R|AID28304.1 MAFF303099|WP_010914407.1 USDA_110|WP_011090239.1 113_2|113-2GL001637	Bidirectionally degrades single-stranded D- into large acid-insoluble oligonucleotides, which are then degraded further into small acid-soluble oligonucleotides (By similarity)	L
	Core cluster	USDA205|WP_014327040.1 Sm2011|AGG72956.1 7653R|AID33555.2 MAFF303099|WP_010912576.1 USDA_110|WP_011083501.1 113_2|113-2GL000164	Phosphorolytic exoribonuclease that removes nucleotide residues following the -CCA terminus of tR- and adds nucleotides to the ends of R- molecules by using nucleoside diphosphates as substrates (By similarity)	J
	Core cluster	USDA205|WP_014327949.1 Sm2011|AGG73812.1 7653R|AID29567.1 MAFF303099|WP_044550248.1 USDA_110|WP_038966321.1 113_2|113-2GL004294	-	-
	Core cluster	USDA205|WP_037394740.1 Sm2011|AGG75207.1 7653R|AID32647.1 MAFF303099|WP_010911675.1 USDA_110|WP_038966657.1 113_2|113-2GL000674	Non-specific O-methyltransferase that catalyzes the 2 O- methylation steps in the ubiquinone biosynthetic pathway (By similarity)	H
	Dispensable cluster	USDA205|WP_037430271.1 Sm2011|AGG71773.1 MAFF303099|WP_044548324.1 USDA_110|WP_162494137.1 113_2|113-2GL002870 Sm2011|AGG71648.1	Dehydrogenase	M
	Core cluster	USDA205|WP_037393011.1 Sm2011|AGG74126.1 7653R|AID30370.1 MAFF303099|WP_080512027.1 USDA_110|WP_038967189.1 113_2|113-2GL003463	The glycine cleavage system catalyzes the degradation of glycine. The P protein binds the alpha-amino group of glycine through its pyridoxal phosphate cofactor	E
	Core cluster	USDA205|WP_037392634.1 Sm2011|AGG73472.1 7653R|AID29581.1 MAFF303099|WP_010915629.1 USDA_110|WP_011083903.1 113_2|113-2GL008545	polysaccharide deacetylase	G
	Dispensable cluster	USDA205|WP_153452007.1 Sm2011|AGG73818.1 7653R|AID33690.1 MAFF303099|WP_010912726.1 USDA_110|WP_011088749.1 MAFF303099|WP_010912638.1	acetyltransferase	S
	Core cluster	USDA205|WP_037435759.1 Sm2011|AGG72515.1 7653R|AID29302.1 MAFF303099|WP_010915389.1 USDA_110|WP_038965912.1 113_2|113-2GL007051	Inherit from COG: Membrane	S
	Core cluster	USDA205|WP_014327035.1 Sm2011|AGG72951.1 7653R|AID29724.1 MAFF303099|WP_032933381.1 USDA_110|WP_038967088.1 113_2|113-2GL003964	activator of Hsp90 ATPase 1 family protein	S
	Core cluster	USDA205|WP_014329646.1 Sm2011|AGG75311.1 7653R|AID32170.2 MAFF303099|WP_010911197.1 USDA_110|WP_038967810.1 113_2|113-2GL007502	Uncharacterized protein conserved in bacteria (DUF2328)	S
	Core cluster	USDA205|WP_060563186.1 Sm2011|AGG72989.1 7653R|AID34317.1 MAFF303099|WP_010913314.1 USDA_110|WP_011083613.1 113_2|113-2GL000042	Transfers the fatty acyl group on membrane lipoproteins (By similarity)	M
	Core cluster	USDA205|WP_037400485.1 Sm2011|AGG74012.1 7653R|AID30381.2 MAFF303099|WP_010909743.1 USDA_110|WP_011087127.1 113_2|113-2GL005087	D- topoisomerase IV, subunit B	L
	Core cluster	USDA205|WP_153452045.1 Sm2011|AGG74254.1 7653R|AID30042.1 MAFF303099|WP_010909434.1 USDA_110|WP_162494131.1 113_2|113-2GL003033	ABC transporter	S
	Dispensable cluster	USDA205|WP_037435034.1 MAFF303099|WP_044548312.1 USDA205|WP_153451858.1 USDA_110|WP_038966276.1 113_2|113-2GL005628 7653R|AID32370.1	Major facilitator superfamily MFS_1	G
	Core cluster	USDA205|WP_037436835.1 Sm2011|AGG74462.1 7653R|AID30078.1 MAFF303099|WP_010909472.1 USDA_110|WP_011086521.1 113_2|113-2GL005787	Dehydrogenase	I
	Core cluster	USDA205|WP_014327824.1 Sm2011|AGG73714.1 7653R|AID29103.1 MAFF303099|WP_010915167.1 USDA_110|WP_011086852.1 113_2|113-2GL005404	Binds to the 23S rR- (By similarity)	J
	Core cluster	USDA205|WP_037391900.1 Sm2011|AGG73096.1 7653R|AID27890.1 MAFF303099|WP_010913392.1 USDA_110|WP_011083916.1 113_2|113-2GL008529	gcrA cell cycle regulator	S
	Core cluster	USDA205|WP_037396049.1 Sm2011|AGG72141.1 7653R|AID30211.1 MAFF303099|WP_010909595.1 USDA_110|WP_011084227.1 113_2|113-2GL008177	Key enzyme in the regulation of glycerol uptake and metabolism (By similarity)	C
	Core cluster	USDA205|WP_037437113.1 Sm2011|AGG74947.1 7653R|AID32073.1 MAFF303099|WP_010911109.1 USDA_110|WP_011090174.1 113_2|113-2GL001706	The natural substrate for this enzyme may be peptidyl- tR-s which drop off the ribosome during protein synthesis (By similarity)	J
	Core cluster	USDA205|WP_014327950.1 Sm2011|AGG73813.1 7653R|AID29568.1 MAFF303099|WP_044550251.1 USDA_110|WP_164930927.1 113_2|113-2GL004295	Sugar transferase	M
	Core cluster	USDA205|WP_014330397.1 Sm2011|AGG72608.1 7653R|AID33922.1 MAFF303099|WP_010912922.1 USDA_110|WP_011083568.1 113_2|113-2GL000089	N-(5'phosphoribosyl)anthranilate isomerase	E
	Core cluster	USDA205|WP_014328227.1 Sm2011|AGG74110.1 7653R|AID30537.1 MAFF303099|WP_010909890.1 USDA_110|WP_011087517.1 113_2|113-2GL004544	Part of the twin-arginine translocation (Tat) system that transports large folded proteins containing a characteristic twin-arginine motif in their signal peptide across membranes. Together with TatB, TatC is part of a receptor directly interacting with Tat signal peptides (By similarity)	U
	Core cluster	USDA205|WP_060563302.1 Sm2011|AGG75449.1 7653R|AID34021.1 MAFF303099|WP_010913016.1 USDA_110|WP_011089861.1 113_2|113-2GL002074	The transhydrogenation between -DH and -DP is coupled to respiration and ATP hydrolysis and functions as a proton pump across the membrane (By similarity)	C
	Core cluster	USDA205|WP_037400018.1 Sm2011|AGG70535.1 7653R|AID32021.1 MAFF303099|WP_044548267.1 USDA_110|WP_051000352.1 113_2|113-2GL003903	Catalyzes the methyl esterification of L-isoaspartyl residues in peptides and proteins that result from spontaneous decomposition of normal L-aspartyl and L-asparaginyl residues. It plays a role in the repair and or degradation of damaged proteins (By similarity)	O
	Core cluster	USDA205|WP_014330542.1 Sm2011|AGG72768.1 7653R|AID34341.1 MAFF303099|WP_010913338.1 USDA_110|WP_011083588.1 113_2|113-2GL000068	Molybdopterin biosynthesis protein	H
	Dispensable cluster	USDA205|WP_037431995.1 Sm2011|AGG71472.1 7653R|AID28367.1 USDA_110|WP_011088911.1 113_2|113-2GL003017 Sm2011|AGG74823.1	l-fuculose phosphate aldolase	G
	Core cluster	USDA205|WP_037392553.1 Sm2011|AGG73508.1 7653R|AID28832.1 MAFF303099|WP_032929383.1 USDA_110|WP_038967973.1 113_2|113-2GL007121	DSBA Oxidoreductase	O
	Core cluster	USDA205|WP_037397656.1 Sm2011|AGG74158.1 7653R|AID31915.1 MAFF303099|WP_010910964.1 USDA_110|WP_011085297.1 113_2|113-2GL007107	Zinc metallopeptidase	S
	Core cluster	USDA205|WP_014857654.1 Sm2011|AGG70130.1 7653R|AID34806.1 MAFF303099|WP_010913569.1 USDA_110|WP_011084583.1 113_2|113-2GL007877	electron-transferring-flavoprotein dehydrogenase	C
	Core cluster	USDA205|WP_037393726.1 Sm2011|AGG75643.1 7653R|AID33311.1 MAFF303099|WP_010912338.1 USDA_110|WP_008145224.1 113_2|113-2GL000414	Catalyzes the reversible oxidation of malate to oxaloacetate (By similarity)	C
	Core cluster	USDA205|WP_037431982.1 Sm2011|AGG71726.1 7653R|AID31073.1 MAFF303099|WP_010910341.1 USDA_110|WP_038965384.1 113_2|113-2GL008097	Sulfate ABC transporter, periplasmic sulfate-binding protein	P
	Core cluster	USDA205|WP_153451634.1 Sm2011|AGG70340.1 7653R|AID32556.2 MAFF303099|WP_044548333.1 USDA_110|WP_038966289.1 113_2|113-2GL004399	copper resistance	P
	Core cluster	USDA205|WP_037435944.1 Sm2011|AGG74320.1 7653R|AID29650.1 MAFF303099|WP_010909063.1 USDA_110|WP_011087110.1 113_2|113-2GL005106	Cysteine desulfurase	E
	Core cluster	USDA205|WP_037398318.1 Sm2011|AGG72738.1 7653R|QGU20623.1 MAFF303099|WP_080512084.1 USDA_110|WP_038967706.1 113_2|113-2GL001015	penicillin-insensitive murein endopeptidase	M
	Core cluster	USDA205|WP_037391103.1 Sm2011|AGG73772.1 7653R|AID29487.1 MAFF303099|WP_010915555.1 USDA_110|WP_011086908.1 113_2|113-2GL005340	Exonuclease involved in the 3' processing of various precursor tR-s. Initiates hydrolysis at the 3'-terminus of an R- molecule and releases 5'-mononucleotides (By similarity)	J
	Core cluster	USDA205|WP_040961719.1 Sm2011|AGG75435.1 7653R|AID28882.1 MAFF303099|WP_010914968.1 USDA_110|WP_011089199.1 113_2|113-2GL002792	Synthesizes alpha-1,4-glucan chains using ADP-glucose (By similarity)	G
	Core cluster	USDA205|WP_014328274.1 Sm2011|AGG74307.1 7653R|AID30478.1 MAFF303099|WP_010909770.1 USDA_110|WP_028171284.1 113_2|113-2GL005079	Aminotransferase	E
	Core cluster	USDA205|WP_080577673.1 Sm2011|AGG75925.1 7653R|AID33153.1 MAFF303099|WP_044548408.1 USDA_110|WP_011083407.1 113_2|113-2GL000264	Protein of unknown function (DUF1674)	S
	Core cluster	USDA205|WP_080577606.1 Sm2011|AGG74620.1 7653R|AID28503.1 MAFF303099|WP_010914626.1 USDA_110|WP_011088551.1 113_2|113-2GL003398	import inner membrane translocase, subunit Tim44	S
	Core cluster	USDA205|WP_014328956.1 Sm2011|AGG74771.1 7653R|AID30986.1 MAFF303099|WP_010910259.1 USDA_110|WP_011089347.1 113_2|113-2GL002624	Catalyzes the addition of meso-diaminopimelic acid to the nucleotide precursor UDP-N-acetylmuramoyl-L-alanyl-D-glutamate (UMAG) in the biosynthesis of bacterial cell-wall peptidoglycan (By similarity)	M
	Dispensable cluster	USDA205|WP_014329027.1 7653R|AID31034.1 MAFF303099|WP_010910304.1 USDA_110|WP_027546512.1 113_2|113-2GL006728 MAFF303099|WP_010916232.1	transcriptional regulator AsnC family	K
	Core cluster	USDA205|WP_037401398.1 Sm2011|AGG72008.1 USDA_110|WP_011087571.1 113_2|113-2GL004484 7653R|AID34188.1 MAFF303099|WP_010913172.1	sensor, signal transduction histidine kinase	T
	Core cluster	USDA205|WP_014330519.1 Sm2011|AGG72734.1 7653R|AID34276.1 MAFF303099|WP_010913271.1 USDA_110|WP_038965361.1 113_2|113-2GL008156	ABC transporter	S
	Core cluster	USDA205|WP_014328493.1 Sm2011|AGG74377.1 7653R|AID29668.1 MAFF303099|WP_010909079.1 USDA_110|WP_011088491.1 113_2|113-2GL003470	Isocitrate dehydrogenase -DP	C
	Core cluster	USDA205|WP_037393530.1 Sm2011|AGG75398.1 7653R|AID32340.1 MAFF303099|WP_010911358.1 USDA_110|WP_011084315.1 113_2|113-2GL008080	Utp--glucose-1-phosphate uridylyltransferase	M
	Core cluster	USDA205|WP_037392649.1 Sm2011|AGG73466.1 USDA_110|WP_011087070.1 113_2|113-2GL005152 7653R|AID28843.2 MAFF303099|WP_044549767.1	BioY protein	S
	Core cluster	USDA205|WP_014327051.1 Sm2011|AGG72965.1 7653R|AID32501.1 MAFF303099|WP_010911492.1 USDA_110|WP_011083566.1 113_2|113-2GL000092	Signal peptide peptidase, SppA	O
	Core cluster	USDA205|WP_014327327.1 Sm2011|AGG73230.1 7653R|AID32232.1 MAFF303099|WP_010911264.1 USDA_110|WP_011089615.1 113_2|113-2GL002338	flagellar biosynthetic protein flhB	N
	Core cluster	USDA205|WP_060563207.1 Sm2011|AGG71840.1 7653R|AID29454.2 MAFF303099|WP_044550182.1 USDA_110|WP_011088981.1 113_2|113-2GL002939	Urocanate hydratase	E
	Core cluster	USDA205|WP_014327726.1 Sm2011|AGG73597.1 7653R|AID28974.1 MAFF303099|WP_010915048.1 USDA_110|WP_011085910.1 113_2|113-2GL006402	Heme chaperone required for the biogenesis of c-type cytochromes. Transiently binds heme delivered by CcmC and transfers the heme to apo-cytochromes in a process facilitated by CcmF and CcmH (By similarity)	O
	Core cluster	USDA205|WP_012707899.1 Sm2011|AGG74083.1 7653R|AID30150.2 MAFF303099|WP_032930326.1 USDA_110|WP_011087619.1 113_2|113-2GL004431	Involved in unsaturated fatty acids biosynthesis. Catalyzes the dehydration of short chain beta-hydroxyacyl-ACPs and long chain saturated and unsaturated beta-hydroxyacyl-ACPs (By similarity)	I
	Core cluster	USDA205|WP_037394238.1 Sm2011|AGG69935.1 7653R|AID30011.1 MAFF303099|WP_044548328.1 USDA_110|WP_011088699.1 113_2|113-2GL003245	Adenylate	T
	Core cluster	USDA205|WP_037435386.1 Sm2011|AGG73000.1 7653R|AID33721.1 MAFF303099|WP_010912759.1 USDA_110|WP_011090830.1 113_2|113-2GL001068	Modifies the free amino group of the aminoacyl moiety of methionyl-tR-(fMet). The formyl group appears to play a dual role in the initiator identity of N-formylmethionyl-tR- by (I) promoting its recognition by IF2 and (II) impairing its binding to EFTu-GTP (By similarity)	J
	Core cluster	USDA205|WP_037394084.1 Sm2011|AGG75491.1 7653R|AID33062.1 MAFF303099|WP_010912070.1 USDA_110|WP_011087355.1 113_2|113-2GL004747	membrane protein terc	P
	Core cluster	USDA205|WP_037391937.1 Sm2011|AGG73121.1 7653R|AID27861.1 MAFF303099|WP_010913363.1 USDA_110|WP_011083967.1 113_2|113-2GL008473	Dead deah box	L
	Core cluster	USDA205|WP_037396757.1 Sm2011|AGG74912.1 7653R|AID31911.1 MAFF303099|WP_044548242.1 USDA_110|WP_011090106.1 113_2|113-2GL001791	Carbamoyl-phosphate synthetase glutamine chain	F
	Core cluster	USDA205|WP_037393818.1 Sm2011|AGG75790.1 7653R|AID33263.2 MAFF303099|WP_032932222.1 USDA_110|WP_011083445.1 113_2|113-2GL000224	outer membrane lipoprotein carrier protein	M
	Core cluster	USDA205|WP_014327717.1 Sm2011|AGG73589.1 7653R|AID28949.1 MAFF303099|WP_010915024.1 USDA_110|WP_011085886.1 113_2|113-2GL006431	penicillin-binding protein 1A	M
	Core cluster	USDA205|WP_014328341.1 Sm2011|AGG74226.1 7653R|AID30049.1 MAFF303099|WP_032930262.1 USDA_110|WP_011087360.1 113_2|113-2GL004742	Invasion-associated protein	S
	Core cluster	USDA205|WP_037392593.1 Sm2011|AGG73491.1 7653R|AID28815.1 MAFF303099|WP_010914898.1 USDA_110|WP_011084133.1 113_2|113-2GL008285	homoserine kinase	E
	Core cluster	USDA205|WP_014328174.1 Sm2011|AGG74055.1 7653R|AID29310.1 MAFF303099|WP_010915399.1 USDA_110|WP_011087220.1 113_2|113-2GL004909	amino acid ABC transporter	E
	Core cluster	USDA205|WP_014328142.1 Sm2011|AGG74021.1 7653R|AID29972.1 MAFF303099|WP_010909324.1 USDA_110|WP_011087568.1 113_2|113-2GL004487	Phospho-2-dehydro-3-deoxyoctonate aldolase	M
	Core cluster	USDA205|WP_153451690.1 Sm2011|AGG73486.1 7653R|AID28808.1 MAFF303099|WP_044549752.1 USDA_110|WP_011083993.1 113_2|113-2GL008446	Exerts its effect at some terminal stage of cytochrome c oxidase synthesis, probably by being involved in the insertion of the copper B into subunit I (By similarity)	O
	Core cluster	USDA205|WP_037401536.1 Sm2011|AGG73891.1 7653R|AID30185.1 MAFF303099|WP_010909575.1 USDA_110|WP_011087850.1 113_2|113-2GL004183	Allows the formation of correctly charged Asn-tR-(Asn) or Gln-tR-(Gln) through the transamidation of misacylated Asp- tR-(Asn) or Glu-tR-(Gln) in organisms which lack either or both of asparaginyl-tR- or glutaminyl-tR- synthetases. The reaction takes place in the presence of glutamine and ATP through an activated phospho-Asp-tR-(Asn) or phospho-Glu-tR-(Gln) (By similarity)	J
	Core cluster	USDA205|WP_014327358.1 Sm2011|AGG73262.1 7653R|AID32266.1 MAFF303099|WP_010911295.1 USDA_110|WP_028175231.1 113_2|113-2GL002360	flagellar biosynthesis regulatory protein FlaF	N
	Core cluster	USDA205|WP_014327710.1 Sm2011|AGG73583.1 USDA_110|WP_011085858.1 113_2|113-2GL006460 7653R|AID28944.1 MAFF303099|WP_010915019.1	Protein of unknown function (DUF1491)	S
	Core cluster	USDA205|WP_060564115.1 Sm2011|AGG74095.1 7653R|AID30557.1 MAFF303099|WP_010909906.1 USDA_110|WP_011087247.1 113_2|113-2GL004881	amino acids such as threonine, to avoid such errors, it has a posttransfer editing activity that hydrolyzes mischarged Thr-tR-(Val) in a tR--dependent manner (By similarity)	J
	Core cluster	USDA205|WP_037431946.1 Sm2011|AGG71750.1 7653R|AID28864.1 MAFF303099|WP_010914951.1 USDA_110|WP_038967035.1 113_2|113-2GL003279	Polysaccharide biosynthesis protein	M
	Core cluster	USDA205|WP_014328423.1 Sm2011|AGG74138.1 7653R|AID30249.1 MAFF303099|WP_010909627.1 USDA_110|WP_011087466.1 113_2|113-2GL004616	single-stranded D--binding protein	L
	Core cluster	USDA205|WP_014857660.1 Sm2011|AGG70125.1 7653R|AID34754.1 MAFF303099|WP_010913564.1 USDA_110|WP_011084566.1 113_2|113-2GL007889	nitrogen fixation protein	Q
	Core cluster	USDA205|WP_014327112.1 Sm2011|AGG73023.1 7653R|AID33691.2 MAFF303099|WP_019862432.1 USDA_110|WP_011090821.1 113_2|113-2GL001077	Necessary for normal cell division and for the maintenance of normal septation (By similarity)	S
	Core cluster	USDA205|WP_037436842.1 Sm2011|AGG72593.1 7653R|AID34026.1 MAFF303099|WP_010913019.1 USDA_110|WP_011083645.1 113_2|113-2GL000008	D- gyrase negatively supercoils closed circular double- stranded D- in an ATP-dependent manner and also catalyzes the interconversion of other topological isomers of double-stranded D- rings, including catenanes and knotted rings (By similarity)	L
	Core cluster	USDA205|WP_014328695.1 Sm2011|AGG74526.1 7653R|AID30633.1 MAFF303099|WP_044547873.1 USDA_110|WP_011086589.1 113_2|113-2GL005709	3-oxoacyl-(Acyl carrier protein) synthase II	I
	Core cluster	USDA205|WP_014327996.1 Sm2011|AGG73858.1 7653R|AID30773.1 MAFF303099|WP_010910099.1 USDA_110|WP_011087672.1 113_2|113-2GL004370	subunit m	C
	Core cluster	USDA205|WP_037394690.1 Sm2011|AGG75238.1 7653R|AID32699.1 MAFF303099|WP_044548349.1 USDA_110|WP_011084198.1 113_2|113-2GL008210	Thiol disulfide interChange protein	O
	Core cluster	USDA205|WP_100209475.1 Sm2011|AGG73910.1 7653R|AID29817.2 MAFF303099|WP_106406542.1 USDA_110|WP_097531964.1 113_2|113-2GL005141	Peptide chain release factor 2 directs the termination of translation in response to the peptide chain termination codons UGA and UAA (By similarity)	J
	Core cluster	USDA205|WP_037393414.1 Sm2011|AGG74112.1 7653R|AID30535.1 MAFF303099|WP_010909888.1 USDA_110|WP_028171844.1 113_2|113-2GL004547	Nucleotidase that shows phosphatase activity on nucleoside 5'-monophosphates (By similarity)	F
	Core cluster	USDA205|WP_012706640.1 Sm2011|AGG72994.1 7653R|AID32493.1 MAFF303099|WP_032931669.1 USDA_110|WP_011083554.1 113_2|113-2GL000107	Heat Shock Protein	O
	Core cluster	USDA205|WP_014328317.1 Sm2011|AGG74257.1 7653R|AID30047.1 MAFF303099|WP_010909440.1 USDA_110|WP_011087357.1 113_2|113-2GL004745	hydroxylase	H
	Core cluster	USDA205|WP_037393732.1 Sm2011|AGG75633.1 7653R|AID33300.2 MAFF303099|WP_010912323.1 USDA_110|WP_011083278.1 113_2|113-2GL000424	Site-specific tyrosine recombinase, which acts by catalyzing the cutting and rejoining of the recombining D- molecules. The XerC-XerD complex is essential to convert dimers of the bacterial chromosome into monomers to permit their segregation at cell division. It also contributes to the segregational stability of plasmids (By similarity)	L
	Core cluster	USDA205|WP_014331455.1 Sm2011|AGG72328.1 7653R|AID28270.1 MAFF303099|WP_010914372.1 USDA_110|WP_011082984.1 113_2|113-2GL000738	cytochrome o ubiquinol oxidase, subunit IV	C
	Core cluster	USDA205|WP_014328974.1 Sm2011|AGG74791.1 7653R|AID31026.1 MAFF303099|WP_010910295.1 USDA_110|WP_011089425.1 113_2|113-2GL002543	abc transporter atp-binding protein	S
	Core cluster	USDA205|WP_014327587.1 Sm2011|AGG73476.1 7653R|AID28781.1 MAFF303099|WP_010914863.1 USDA_110|WP_011085415.1 113_2|113-2GL006934	Enoyl- acyl-carrier-protein reductase -DH	I
	Core cluster	USDA205|WP_014329837.1 Sm2011|AGG75463.1 7653R|AID32299.2 MAFF303099|WP_044548301.1 USDA_110|WP_011090485.1 113_2|113-2GL001354	Gcn5-related n-acetyltransferase	S
	Core cluster	USDA205|WP_014327985.1 Sm2011|AGG73844.1 7653R|AID30786.1 MAFF303099|WP_010910112.1 USDA_110|WP_008136158.1 113_2|113-2GL004356	NDH-1 shuttles electrons from -DH, via FMN and iron- sulfur (Fe-S) centers, to quinones in the respiratory chain (By similarity)	C
	Core cluster	USDA205|WP_014328169.1 Sm2011|AGG74051.1 USDA_110|WP_011084296.1 113_2|113-2GL008099 7653R|AID32520.1 MAFF303099|WP_010911512.1	Bacterial protein of unknown function (DUF934)	S
	Core cluster	USDA205|WP_014327079.1 Sm2011|AGG72991.1 7653R|AID34319.1 MAFF303099|WP_010913316.1 USDA_110|WP_011088686.1 113_2|113-2GL003258	Catalyzes the formation of S-adenosylmethionine from methionine and ATP	H
	Core cluster	USDA205|WP_037393982.1 Sm2011|AGG75813.1 7653R|AID33350.1 MAFF303099|WP_010912376.1 USDA_110|WP_011083356.1 113_2|113-2GL000336	Specifically methylates position 2 of adenine 2503 in 23S rR- and position 2 of adenine 37 in tR-s. m2A2503 modification seems to play a crucial role in the proofreading step occurring at the peptidyl transferase center and thus would serve to optimize ribosomal fidelity (By similarity)	J
	Core cluster	USDA205|WP_080578989.1 Sm2011|AGG72457.1 7653R|AID30654.1 MAFF303099|WP_010909986.1 USDA_110|WP_011086732.1 113_2|113-2GL005534	acyl-CoA dehydrogenase	I
	Core cluster	USDA205|WP_037432939.1 Sm2011|AGG73969.1 7653R|AID29929.2 MAFF303099|WP_010909295.1 USDA_110|WP_011085424.1 113_2|113-2GL006925	Protein CrcB homolog	D
	Core cluster	USDA205|WP_037391123.1 Sm2011|AGG73785.1 7653R|AID29520.1 MAFF303099|WP_010915582.1 USDA_110|WP_038966342.1 113_2|113-2GL004240	Delta-aminolevulinic acid dehydratase	H
	Core cluster	USDA205|WP_014330107.1 Sm2011|AGG75782.1 7653R|AID33407.1 MAFF303099|WP_010912431.1 USDA_110|WP_028174970.1 113_2|113-2GL000247	Thioredoxin	O
	Core cluster	USDA205|WP_037428374.1 Sm2011|AGG72467.1 7653R|AID32574.2 MAFF303099|WP_010911603.1 USDA_110|WP_011084043.1 113_2|113-2GL008391	phosphonate C-P lyase system protein PhnK	P
	Core cluster	USDA205|WP_014327833.1 Sm2011|AGG73726.1 7653R|AID29115.2 MAFF303099|WP_027053294.1 USDA_110|WP_011086862.1 113_2|113-2GL005391	Essential for recycling GMP and indirectly, cGMP (By similarity)	F
	Core cluster	USDA_110|WP_063921493.1 113_2|113-2GL003683 USDA205|WP_014328114.1 Sm2011|AGG73995.1 7653R|AID29791.1 MAFF303099|WP_032930124.1	Rhomboid family	S
	Core cluster	USDA205|WP_014329617.1 Sm2011|AGG75654.1 7653R|AID31621.1 MAFF303099|WP_010910823.1 USDA_110|WP_011086177.1 113_2|113-2GL006126	Trehalose utilisation	S
	Core cluster	USDA205|WP_037396528.1 Sm2011|AGG74375.1 7653R|AID29670.2 MAFF303099|WP_010909081.1 USDA_110|WP_011088490.1 113_2|113-2GL003472	Methyltransferase	J
	Core cluster	USDA205|WP_037398696.1 Sm2011|AGG72583.1 7653R|AID33450.1 MAFF303099|WP_010912478.1 USDA_110|WP_011083465.1 113_2|113-2GL000200	Maf-like protein	D
	Core cluster	USDA205|WP_014329540.1 Sm2011|AGG75239.1 7653R|AID32700.1 MAFF303099|WP_010911726.1 USDA_110|WP_038965353.1 113_2|113-2GL008212	Arginosuccinase	E
	Core cluster	USDA205|WP_014329155.1 Sm2011|AGG74977.1 7653R|AID29427.1 MAFF303099|WP_010915503.1 USDA_110|WP_038967228.1 113_2|113-2GL004491	Catalyzes the -DPH-dependent reduction of 7-cyano-7- deazaguanine (preQ0) to 7-aminomethyl-7-deazaguanine (preQ1) (By similarity)	S
	Core cluster	USDA205|WP_037396450.1 Sm2011|AGG74181.1 7653R|AID30012.1 MAFF303099|WP_010909359.1 USDA_110|WP_011087285.1 113_2|113-2GL004837	Beta-lactamase domain protein	S
	Core cluster	USDA205|WP_037391931.1 Sm2011|AGG73113.1 7653R|AID27875.1 MAFF303099|WP_010913377.1 USDA_110|WP_011083978.1 113_2|113-2GL008462	acetyl-coa acetyltransferase	I
	Core cluster	USDA205|WP_014328954.1 Sm2011|AGG74769.1 7653R|AID30984.1 MAFF303099|WP_010910257.1 USDA_110|WP_011089345.1 113_2|113-2GL002626	First step of the lipid cycle reactions in the biosynthesis of the cell wall peptidoglycan (By similarity)	M
	Core cluster	USDA205|WP_014328065.1 Sm2011|AGG73936.1 7653R|AID29898.1 MAFF303099|WP_010909274.1 USDA_110|WP_011088150.1 113_2|113-2GL003853	One of the primary rR- binding proteins, this protein initially binds near the 5'-end of the 23S rR-. It is important during the early stages of 50S assembly. It makes multiple contacts with different domains of the 23S rR- in the assembled 50S subunit and ribosome (By similarity)	J
	Core cluster	USDA205|WP_014328326.1 Sm2011|AGG74247.1 7653R|AID30133.1 MAFF303099|WP_010909527.1 USDA_110|WP_011087593.1 113_2|113-2GL004458	biosynthesis protein	H
	Core cluster	USDA205|WP_014328068.1 Sm2011|AGG73944.1 7653R|AID29906.1 MAFF303099|WP_010909280.1 USDA_110|WP_011088143.1 113_2|113-2GL003861	One of the primary rR- binding proteins, it binds specifically to the 5'-end of 16S ribosomal	J
	Core cluster	USDA205|WP_014328069.1 Sm2011|AGG73947.1 7653R|AID29909.1 MAFF303099|WP_010909281.1 USDA_110|WP_011088141.1 113_2|113-2GL003864	This is 1 of the proteins that binds and probably mediates the attachment of the 5S R- into the large ribosomal subunit, where it forms part of the central protuberance. In the 70S ribosome it contacts protein S13 of the 30S subunit (bridge B1b), connecting the 2 subunits	J
	Core cluster	USDA205|WP_014330540.1 Sm2011|AGG72753.1 7653R|AID34339.2 MAFF303099|WP_010913336.1 USDA_110|WP_011083589.1 113_2|113-2GL000067	Glyoxylate reductase	C
	Core cluster	USDA205|WP_014330019.1 Sm2011|AGG75605.1 7653R|AID30216.1 MAFF303099|WP_010909599.1 USDA_110|WP_011085226.1 113_2|113-2GL007188	Binding-protein-dependent transport systems inner membrane component	G
	Core cluster	USDA205|WP_014330549.1 Sm2011|AGG72761.1 7653R|AID33621.1 MAFF303099|WP_010912682.1 USDA_110|WP_011083506.1 113_2|113-2GL000160	Acts as a chaperone (By similarity)	O
	Core cluster	USDA205|WP_037436126.1 Sm2011|AGG69760.1 7653R|AID33963.2 MAFF303099|WP_044548750.1 USDA_110|WP_011085828.1 113_2|113-2GL006490	Peptidase S8 and S53 subtilisin kexin sedolisin	O
	Core cluster	USDA205|WP_014330154.1 Sm2011|AGG75819.1 7653R|AID33341.1 MAFF303099|WP_010912366.1 USDA_110|WP_011083291.1 113_2|113-2GL000409	ABC transporter	Q
	Core cluster	USDA205|WP_037393447.1 Sm2011|AGG74082.1 7653R|AID30151.1 MAFF303099|WP_010909544.1 USDA_110|WP_011087620.1 113_2|113-2GL004430	Catalyzes the N-acylation of UDP-3-O-acylglucosamine using 3-hydroxyacyl-ACP as the acyl donor. Is involved in the biosynthesis of lipid A, a phosphorylated glycolipid that anchors the lipopolysaccharide to the outer membrane of the cell (By similarity)	M
	Core cluster	USDA205|WP_014327537.1 Sm2011|AGG73425.1 7653R|AID28753.2 MAFF303099|WP_027041409.1 USDA_110|WP_011085319.1 113_2|113-2GL007082	Domain of unknown function (DUF2007)	S
	Core cluster	USDA205|WP_050984128.1 Sm2011|AGG72962.1 7653R|AID32498.1 MAFF303099|WP_010911489.1 USDA_110|WP_011083547.1 113_2|113-2GL000114	ABC transporter	S
	Core cluster	USDA205|WP_014328702.1 Sm2011|AGG74532.1 7653R|AID30800.1 MAFF303099|WP_010910126.1 USDA_110|WP_011086056.1 113_2|113-2GL006250	Responsible for the amidation of carboxylic groups at position A and C of either cobyrinic acid or hydrogenobrynic acid. NH(2) groups are provided by glutamine, and one molecule of ATP is hydrogenolyzed for each amidation (By similarity)	H
	Core cluster	USDA205|WP_060563864.1 Sm2011|AGG72760.1 7653R|AID32530.2 MAFF303099|WP_010911522.1 USDA_110|WP_011083732.1 113_2|113-2GL008733	penicillin-binding protein 1A	M
	Core cluster	USDA205|WP_060564100.1 Sm2011|AGG73970.1 7653R|AID28449.1 MAFF303099|WP_010914578.1 USDA_110|WP_011088926.1 113_2|113-2GL002998	S-formylglutathione hydrolase	S
	Core cluster	USDA205|WP_037400467.1 Sm2011|AGG74017.1 7653R|AID30128.1 MAFF303099|WP_010909521.1 USDA_110|WP_011087575.1 113_2|113-2GL004480	Triose-phosphate isomerase	G
	Core cluster	USDA205|WP_042779273.1 Sm2011|AGG70136.1 7653R|AID34764.2 MAFF303099|WP_010913610.1 USDA_110|WP_011084553.1 113_2|113-2GL007904	nitrogenase molybdenum-iron protein beta chain	C
	Core cluster	USDA205|WP_037435154.1 Sm2011|AGG71859.1 7653R|AID31355.1 MAFF303099|WP_010910602.1 USDA_110|WP_011090513.1 113_2|113-2GL001323	Molecular chaperone. Has ATPase activity (By similarity)	O
	Core cluster	USDA205|WP_037428923.1 Sm2011|AGG74829.1 7653R|AID28616.1 MAFF303099|WP_010914713.1 USDA_110|WP_011084695.1 113_2|113-2GL007776	ABC transporter (Permease	G
	Core cluster	USDA205|WP_014329274.1 Sm2011|AGG75038.1 7653R|AID33779.1 MAFF303099|WP_010912814.1 USDA_110|WP_011086003.1 113_2|113-2GL006302	Transcriptional regulator	K
	Core cluster	USDA205|WP_014327118.1 Sm2011|AGG73030.1 7653R|AID33682.1 MAFF303099|WP_032932475.1 USDA_110|WP_049832616.1 113_2|113-2GL001081	Histidine kinase	T
	Core cluster	USDA205|WP_153452128.1 Sm2011|AGG73510.1 7653R|AID28833.1 MAFF303099|WP_010914916.1 USDA_110|WP_011085283.1 113_2|113-2GL007123	Required for chromosome condensation and partitioning (By similarity)	D
	Core cluster	USDA205|WP_014329526.1 Sm2011|AGG75222.1 7653R|AID32670.1 MAFF303099|WP_044548345.1 USDA_110|WP_011088523.1 113_2|113-2GL003429	-	-
	Core cluster	USDA205|WP_012709410.1 Sm2011|AGG75450.1 7653R|AID34020.1 MAFF303099|WP_032932694.1 USDA_110|WP_011089862.1 113_2|113-2GL002073	nad(p) transhydrogenase subunit alpha	C
	Core cluster	USDA205|WP_014328489.1 Sm2011|AGG74372.1 7653R|AID29676.1 MAFF303099|WP_010909086.1 USDA_110|WP_011088452.1 113_2|113-2GL003512	One of the primary rR- binding proteins, it binds directly to 16S rR- where it nucleates assembly of the body of the 30S subunit (By similarity)	J
	Core cluster	USDA205|WP_012709746.1 Sm2011|AGG75856.1 7653R|AID32989.1 MAFF303099|WP_010911999.1 USDA_110|WP_161532582.1 113_2|113-2GL000734	Transcriptional regulator CarD family	K
	Core cluster	USDA205|WP_037396064.1 Sm2011|AGG74999.1 7653R|AID30624.2 MAFF303099|WP_010909956.1 USDA_110|WP_038966881.1 113_2|113-2GL005567	2-dehydro-3-deoxygluconokinase	G
	Core cluster	USDA205|WP_014328093.1 Sm2011|AGG73975.1 7653R|AID30761.2 MAFF303099|WP_010910087.1 USDA_110|WP_011088013.1 113_2|113-2GL003997	Catalyzes the transfer of endogenously produced octanoic acid from octanoyl-acyl-carrier-protein onto the lipoyl domains of lipoate-dependent enzymes. Lipoyl-ACP can also act as a substrate although octanoyl-ACP is likely to be the physiological substrate (By similarity)	H
	Core cluster	USDA205|WP_014327990.1 Sm2011|AGG73850.1 7653R|AID30781.1 MAFF303099|WP_010910107.1 USDA_110|WP_011087678.1 113_2|113-2GL004363	#NAME?	C
	Core cluster	USDA205|WP_014327141.1 Sm2011|AGG73063.1 7653R|AID28873.1 MAFF303099|WP_010914959.1 USDA_110|WP_011086011.1 113_2|113-2GL006295	fructokinase	G
	Core cluster	USDA205|WP_014329141.1 Sm2011|AGG74959.1 7653R|AID32107.2 MAFF303099|WP_010911141.1 USDA_110|WP_011085250.1 113_2|113-2GL007159	N-terminal double-transmembrane domain protein	S
	Core cluster	USDA205|WP_012707029.1 Sm2011|AGG73414.1 7653R|AID28740.1 MAFF303099|WP_010914827.1 USDA_110|WP_007599451.1 113_2|113-2GL008433	ATP synthase, subunit C	C
	Core cluster	USDA205|WP_014858070.1 Sm2011|AGG70156.1 7653R|QGU21229.1 MAFF303099|WP_010913821.1 USDA_110|WP_011084824.1 113_2|113-2GL007651	of N-acetylglucosamine which initiates a series of events in the host plant species leading eventually to nodulation	M
	Core cluster	USDA205|WP_014328558.1 Sm2011|AGG74452.1 7653R|AID30074.1 MAFF303099|WP_010909468.1 USDA_110|WP_011085099.1 113_2|113-2GL007338	Molybdopterin-guanine dinucleotide biosynthesis protein B	H
	Core cluster	USDA205|WP_037396927.1 Sm2011|AGG74757.1 7653R|AID30976.1 MAFF303099|WP_010910247.1 USDA_110|WP_011089335.1 113_2|113-2GL002638	involved in the biosynthesis of lipid A, a phosphorylated glycolipid that anchors the lipopolysaccharide to the outer membrane of the cell (By similarity)	M
	Core cluster	USDA205|WP_037394315.1 Sm2011|AGG75112.1 7653R|AID30507.1 MAFF303099|WP_032930518.1 USDA_110|WP_038966245.1 113_2|113-2GL005739	cytochrome C oxidase subunit IV	S
	Core cluster	USDA205|WP_060563690.1 Sm2011|AGG72327.1 7653R|AID28269.1 MAFF303099|WP_010914371.1 USDA_110|WP_011082983.1 113_2|113-2GL000739	cytochrome o ubiquinol oxidase subunit III	C
	Core cluster	USDA205|WP_014330129.1 Sm2011|AGG75845.1 7653R|AID33296.1 MAFF303099|WP_010912318.1 USDA_110|WP_011083318.1 113_2|113-2GL000381	This protein is located at the 30S-50S ribosomal subunit interface and may play a role in the structure and function of the aminoacyl-tR- binding site (By similarity)	J
	Core cluster	USDA205|WP_037396542.1 Sm2011|AGG74391.1 7653R|AID30278.1 MAFF303099|WP_010909649.1 USDA_110|WP_011089988.1 113_2|113-2GL001925	amino acid regulated cytosolic protein	S
	Core cluster	USDA205|WP_012706883.1 Sm2011|AGG73265.1 7653R|AID32269.1 MAFF303099|WP_010911298.1 USDA_110|WP_008130649.1 113_2|113-2GL002363	flagellar biosynthetic protein fliQ	N
	Core cluster	USDA205|WP_014329552.1 Sm2011|AGG75251.1 7653R|AID32722.2 MAFF303099|WP_010911748.1 USDA_110|WP_028173537.1 113_2|113-2GL008196	Cation transport protein	P
	Core cluster	USDA205|WP_014329832.1 Sm2011|AGG75459.1 7653R|AID33996.1 MAFF303099|WP_044548762.1 USDA_110|WP_011090493.1 113_2|113-2GL001346	cobalamin synthesis protein	S
	Core cluster	USDA205|WP_014329644.1 Sm2011|AGG75309.1 7653R|AID32172.1 MAFF303099|WP_006203583.1 USDA_110|WP_008138878.1 113_2|113-2GL007492	regulator	T
	Core cluster	USDA205|WP_037397705.1 Sm2011|AGG74137.1 7653R|AID30255.1 MAFF303099|WP_010909632.1 USDA_110|WP_011087470.1 113_2|113-2GL004611	The UvrABC repair system catalyzes the recognition and processing of D- lesions. UvrA is an ATPase and a D--binding protein. A damage recognition complex composed of 2 UvrA and 2 UvrB subunits scans D- for abnormalities. When the presence of a lesion has been verified by UvrB, the UvrA molecules dissociate (By similarity)	L
	Core cluster	USDA205|WP_014327531.1 Sm2011|AGG73418.1 7653R|AID28744.1 MAFF303099|WP_044551515.1 USDA_110|WP_011085306.1 113_2|113-2GL007096	radical SAM domain protein	L
	Core cluster	USDA205|WP_037399621.1 Sm2011|AGG72971.1 7653R|AID32510.1 MAFF303099|WP_010911501.1 USDA_110|WP_028174654.1 113_2|113-2GL001665	This protein specifically catalyzes the removal of signal peptides from prolipoproteins (By similarity)	O
	Core cluster	USDA205|WP_037396741.1 Sm2011|AGG74923.1 USDA_110|WP_028171220.1 113_2|113-2GL005174 7653R|AID32044.1 MAFF303099|WP_010911084.1	BA14K-like protein	S
	Core cluster	USDA205|WP_037392622.1 Sm2011|AGG73480.1 7653R|AID28784.2 MAFF303099|WP_010914867.1 USDA_110|WP_011085401.1 113_2|113-2GL006948	Catalyzes the conversion of D-ribulose 5-phosphate to formate and 3,4-dihydroxy-2-butanone 4-phosphate (By similarity)	H
	Core cluster	USDA205|WP_014330671.1 Sm2011|AGG72828.1 7653R|AID34335.1 MAFF303099|WP_010913332.1 USDA_110|WP_011083591.1 113_2|113-2GL000064	Necessary for the introduction of cis unsaturation into fatty acids. Catalyzes the dehydration of (3R)-3-hydroxydecanoyl- ACP to E-(2)-decenoyl-ACP and then its isomerization to Z-(3)- decenoyl-ACP. Can catalyze the dehydratase reaction for beta- hydroxyacyl-ACPs with saturated chain lengths up to 16 0, being most active on intermediate chain length (By similarity)	I
	Core cluster	USDA205|WP_037430514.1 Sm2011|AGG71847.1 7653R|AID33843.2 MAFF303099|WP_044548694.1 USDA_110|WP_011084046.1 113_2|113-2GL008388	Phosphonate metabolism protein 1,5-bisphosphokinase (PRPP-forming) PhnN	P
	Core cluster	USDA205|WP_015633488.1 Sm2011|AGG70158.1 7653R|QGU21221.1 MAFF303099|WP_044549143.1 USDA_110|WP_011084822.1 113_2|113-2GL007652	N-acyltransferase required for nodulation. Acts in the production of a small, heat-stable compound (Nod) that stimulates mitosis in various plant protoplasts (By similarity)	O
	Core cluster	USDA205|WP_014327460.1 Sm2011|AGG73341.1 7653R|QGU20858.1 MAFF303099|WP_010915551.1 USDA_110|WP_011086749.1 113_2|113-2GL005516	Catalyzes the conversion of inosine 5'-phosphate (IMP) to xanthosine 5'-phosphate (XMP), the first committed and rate- limiting step in the de novo synthesis of guanine nucleotides, and therefore plays an important role in the regulation of cell growth (By similarity)	F
	Core cluster	USDA205|WP_037434412.1 Sm2011|AGG71875.1 7653R|AID32851.1 MAFF303099|WP_010911873.1 USDA_110|WP_011086031.1 113_2|113-2GL006275	dioxygenase	S
	Core cluster	USDA205|WP_037430524.1 Sm2011|AGG71857.1 7653R|AID32216.1 MAFF303099|WP_010911248.1 USDA_110|WP_011085402.1 113_2|113-2GL006947	Dehydrogenase	I
	Dispensable cluster	USDA205|WP_014330444.1 MAFF303099|WP_010915138.1 USDA205|WP_050994704.1 USDA_110|WP_011088611.1 113_2|113-2GL003336 7653R|AID29067.2	LysR family transcriptional regulator	K
	Core cluster	USDA205|WP_014330326.1 Sm2011|AGG75900.1 7653R|AID32362.1 MAFF303099|WP_044548311.1 USDA_110|WP_011087610.1 113_2|113-2GL004440	ABC transporter	G
	Core cluster	USDA205|WP_037398314.1 Sm2011|AGG72740.1 7653R|QGU20622.1 MAFF303099|WP_010912590.1 USDA_110|WP_011087321.1 113_2|113-2GL004784	glucokinase (EC 2.7.1.2)	G
	Core cluster	USDA205|WP_014328211.1 Sm2011|AGG74094.1 7653R|AID30560.2 MAFF303099|WP_032930558.1 USDA_110|WP_038967575.1 113_2|113-2GL004882	Protein of unknown function (DUF2497)	S
	Core cluster	USDA205|WP_153451418.1 Sm2011|AGG74442.1 7653R|AID30057.1 MAFF303099|WP_010909451.1 USDA_110|WP_011086535.1 113_2|113-2GL005772	Phosphoglycolate phosphatase	S
	Core cluster	USDA205|WP_060563372.1 Sm2011|AGG75783.1 7653R|AID33406.1 MAFF303099|WP_027047556.1 USDA_110|WP_011083424.1 113_2|113-2GL000246	Peptidase S16, lon domain protein	O
	Core cluster	USDA205|WP_037432056.1 Sm2011|AGG71706.1 7653R|AID33640.1 MAFF303099|WP_010912701.1 USDA_110|WP_011090615.1 113_2|113-2GL001213	fumarylacetoacetate hydrolase family protein	Q
	Core cluster	USDA205|WP_037396310.1 Sm2011|AGG72117.1 7653R|AID32196.1 MAFF303099|WP_010911234.1 USDA_110|WP_162494075.1 113_2|113-2GL006734	Nitrite reductase (-D(P)H) large subunit	C
	Core cluster	USDA205|WP_037394213.1 Sm2011|AGG75433.1 7653R|AID28880.1 MAFF303099|WP_010914966.1 USDA_110|WP_038965697.1 113_2|113-2GL002455	Catalyzes the formation of the alpha-1,6-glucosidic linkages in glycogen by scission of a 1,4-alpha-linked oligosaccharide from growing alpha-1,4-glucan chains and the subsequent attachment of the oligosaccharide to the alpha-1,6 position (By similarity)	G
	Core cluster	USDA205|WP_080577284.1 Sm2011|AGG73411.1 7653R|AID28737.1 MAFF303099|WP_010914824.1 USDA_110|WP_038965917.1 113_2|113-2GL007072	Cell wall hydrolase	M
	Core cluster	USDA205|WP_037431314.1 Sm2011|AGG72910.1 7653R|AID34030.2 MAFF303099|WP_044551122.1 USDA_110|WP_011083542.1 113_2|113-2GL000119	#NAME?	G, M
	Core cluster	USDA205|WP_012707650.1 Sm2011|AGG73875.1 7653R|AID30336.1 MAFF303099|WP_006201775.1 USDA_110|WP_007603295.1 113_2|113-2GL004153	50S ribosomal protein L33	J
	Core cluster	USDA205|WP_037396518.1 Sm2011|AGG74367.1 7653R|AID29680.1 MAFF303099|WP_044550342.1 USDA_110|WP_063921631.1 113_2|113-2GL003635	drug resistance transporter, Bcr CflA	P
	Core cluster	USDA205|WP_086018604.1 Sm2011|AGG74100.1 7653R|AID30547.1 MAFF303099|WP_010909899.1 USDA_110|WP_011087527.1 113_2|113-2GL004534	Iron-sulfur cluster assembly accessory protein	S
	Core cluster	USDA205|WP_012709651.1 Sm2011|AGG75753.1 7653R|AID33117.1 MAFF303099|WP_010912121.1 USDA_110|WP_011083252.1 113_2|113-2GL000451	This protein binds to 23S rR- in the presence of protein L20 (By similarity)	J
	Core cluster	USDA205|WP_014328100.1 Sm2011|AGG73982.1 7653R|AID30746.2 MAFF303099|WP_010910074.1 USDA_110|WP_011088007.1 113_2|113-2GL004005	magnesium transporter	P
	Core cluster	USDA205|WP_014329545.1 Sm2011|AGG75244.1 7653R|AID32709.2 MAFF303099|WP_010911735.1 USDA_110|WP_011084205.1 113_2|113-2GL008202	response regulator	T
	Core cluster	USDA205|WP_037391244.1 Sm2011|AGG73627.1 7653R|AID28998.2 MAFF303099|WP_010915070.1 USDA_110|WP_011087843.1 113_2|113-2GL004189	Sel1 domain protein repeat-containing protein	S
	Core cluster	USDA205|WP_037401515.1 Sm2011|AGG73898.1 7653R|AID29804.1 MAFF303099|WP_010909207.1 USDA_110|WP_011087059.1 113_2|113-2GL005164	Functions in the N-end rule pathway of protein degradation where it conjugates Leu, Phe and, less efficiently, Met from aminoacyl-tR-s to the N-termini of proteins containing an N-terminal arginine or lysine (By similarity)	O
	Core cluster	USDA205|WP_037393763.1 Sm2011|AGG75803.1 7653R|AID29199.2 USDA_110|WP_038967749.1 113_2|113-2GL003349 MAFF303099|WP_044549931.1	phosphohistidine phosphatase, SixA	T
	Core cluster	USDA205|WP_037391222.1 Sm2011|AGG73652.1 7653R|AID29033.2 MAFF303099|WP_010915105.1 USDA_110|WP_011087821.1 113_2|113-2GL004212	An essential GTPase that binds both GDP and GTP, with rapid nucleotide exchange. Plays a role in 16S rR- processing and 30S ribosomal subunit biogenesis and possibly also in cell cycle regulation and energy metabolism (By similarity)	K
	Core cluster	USDA205|WP_014328665.1 Sm2011|AGG74508.1 7653R|AID34006.1 MAFF303099|WP_010913001.1 USDA_110|WP_028170829.1 113_2|113-2GL005784	extracellular solute-binding protein, family 7	Q
	Core cluster	USDA205|WP_037396578.1 Sm2011|AGG74406.1 7653R|QGU20673.1 MAFF303099|WP_010911127.1 USDA_110|WP_011085538.1 113_2|113-2GL006790	ABC transporter	V
	Core cluster	USDA205|WP_086018596.1 Sm2011|AGG74335.1 7653R|AID29707.1 MAFF303099|WP_010909118.1 USDA_110|WP_011088407.1 113_2|113-2GL003562	Sulfurylase small subunit, molybdopterin cytosine dinucleotide biosynthesis	O
	Core cluster	USDA205|WP_014330344.1 Sm2011|AGG75917.1 7653R|AID33180.1 MAFF303099|WP_010912207.1 USDA_110|WP_011083331.1 113_2|113-2GL000366	carbonic anhydrase	P
	Core cluster	USDA205|WP_014327303.1 Sm2011|AGG73204.1 7653R|AID29558.2 MAFF303099|WP_010915615.1 USDA_110|WP_011090290.1 113_2|113-2GL001581	ybak prolyl-trna synthetase associated region	S
	Core cluster	USDA205|WP_014327646.1 Sm2011|AGG73523.1 USDA_110|WP_011084297.1 113_2|113-2GL008098 7653R|AID32521.1 MAFF303099|WP_010911513.1	Reduction of activated sulfate into sulfite (By similarity)	P
	Core cluster	USDA205|WP_014327718.1 Sm2011|AGG73590.1 7653R|AID31828.1 MAFF303099|WP_010910901.1 USDA_110|WP_011085887.1 113_2|113-2GL006429	UPF0260 protein	S
	Core cluster	USDA205|WP_037394619.1 Sm2011|AGG75280.1 7653R|AID32759.2 MAFF303099|WP_010911789.1 USDA_110|WP_011084138.1 113_2|113-2GL008280	Carboxypeptidase	M
	Core cluster	USDA205|WP_012709372.1 Sm2011|AGG75412.1 7653R|AID32346.1 MAFF303099|WP_010911365.1 USDA_110|WP_028173863.1 113_2|113-2GL001374	HeAt shock protein	O
	Core cluster	USDA205|WP_014328446.1 Sm2011|AGG74164.1 7653R|AID30234.1 MAFF303099|WP_044547678.1 USDA_110|WP_011087461.1 113_2|113-2GL004623	PPIases accelerate the folding of proteins (By similarity)	O
	Core cluster	USDA205|WP_014328281.1 Sm2011|AGG74303.1 7653R|AID29773.1 MAFF303099|WP_010909179.1 USDA_110|WP_011087171.1 113_2|113-2GL004972	glyoxalase bleomycin resistance protein dioxygenase	E
	Core cluster	USDA205|WP_014327336.1 Sm2011|AGG73239.1 7653R|AID32242.1 MAFF303099|WP_010911273.1 USDA_110|WP_011089614.1 113_2|113-2GL002339	flagellar basal-body rod protein	N
	Core cluster	USDA205|WP_037399508.1 Sm2011|AGG73394.1 7653R|AID29419.1 MAFF303099|WP_010915495.1 USDA_110|WP_011090225.1 113_2|113-2GL001652	This protein is involved in the repair of mismatches in D-. It is required for dam-dependent methyl-directed D- mismatch repair. May act as a molecular matchmaker , a protein that promotes the formation of a stable complex between two or more D--binding proteins in an ATP-dependent manner without itself being part of a final effector complex (By similarity)	L
	Core cluster	USDA205|WP_014329028.1 Sm2011|AGG74868.1 7653R|AID31033.2 MAFF303099|WP_010910303.1 USDA_110|WP_011088652.1 113_2|113-2GL003294	methionine gamma-lyase	E
	Core cluster	USDA205|WP_153451289.1 Sm2011|AGG73650.1 7653R|AID29031.2 MAFF303099|WP_010915103.1 USDA_110|WP_011087823.1 113_2|113-2GL004210	Signal peptidase i	U
	Core cluster	USDA205|WP_060563388.1 Sm2011|AGG75363.1 7653R|AID32914.1 MAFF303099|WP_027047479.1 USDA_110|WP_011084320.1 113_2|113-2GL008075	Protein of unknown function (DUF1192)	S
	Core cluster	USDA205|WP_014329216.1 Sm2011|AGG72195.1 7653R|AID27904.1 MAFF303099|WP_010913403.1 USDA_110|WP_038966050.1 113_2|113-2GL006312	ABC transporter	P
	Core cluster	USDA205|WP_037400932.1 Sm2011|AGG74687.1 7653R|AID30872.1 MAFF303099|WP_010910153.1 USDA_110|WP_028173081.1 113_2|113-2GL002160	Exodeoxyribonuclease V	L
	Core cluster	USDA205|WP_014328323.1 Sm2011|AGG74251.1 7653R|AID30039.1 MAFF303099|WP_010909431.1 USDA_110|WP_038966719.1 113_2|113-2GL003030	Basic membrane lipoprotein	S
	Core cluster	USDA205|WP_037394092.1 Sm2011|AGG75489.1 7653R|AID33692.1 MAFF303099|WP_010912728.1 USDA_110|WP_011089363.1 113_2|113-2GL002608	Transcriptional regulator, TetR family	K
	Core cluster	USDA205|WP_037393935.1 Sm2011|AGG75818.1 7653R|AID33342.1 MAFF303099|WP_032932275.1 USDA_110|WP_038965065.1 113_2|113-2GL000410	lipolytic protein G-D-S-L family	E
	Core cluster	USDA205|WP_037391110.1 Sm2011|AGG73760.1 7653R|AID29758.2 MAFF303099|WP_010909167.1 USDA_110|WP_011085353.1 113_2|113-2GL007042	nudix hydrolase	S
	Core cluster	USDA205|WP_060563216.1 Sm2011|AGG70957.1 7653R|AID32424.1 MAFF303099|WP_010911438.1 USDA_110|WP_011089518.1 113_2|113-2GL002442	One of the components of the high-affinity ATP-driven potassium transport (or KDP) system, which catalyzes the hydrolysis of ATP coupled with the exchange of hydrogen and potassium ions (By similarity)	P
	Core cluster	USDA205|WP_014327828.1 Sm2011|AGG73720.1 7653R|AID29109.1 MAFF303099|WP_010915171.1 USDA_110|WP_011086857.1 113_2|113-2GL005397	malonyl CoA-acyl carrier protein transacylase	I
	Core cluster	USDA205|WP_037398013.1 Sm2011|AGG75589.1 7653R|AID28234.1 MAFF303099|WP_010914319.1 USDA_110|WP_011088863.1 113_2|113-2GL003069	arginase	E
	Core cluster	USDA205|WP_014327106.1 Sm2011|AGG73019.1 7653R|AID33700.1 MAFF303099|WP_010912736.1 USDA_110|WP_011090823.1 113_2|113-2GL001075	#NAME?	E
	Core cluster	USDA205|WP_037395492.1 Sm2011|AGG74491.1 7653R|AID30091.2 MAFF303099|WP_010909483.1 USDA_110|WP_011086515.1 113_2|113-2GL005793	Catalyzes the synthesis of dihydrouridine, a modified base found in the D-loop of most tR-s (By similarity)	J
	Core cluster	USDA205|WP_037392031.1 Sm2011|AGG73247.1 7653R|AID32250.1 MAFF303099|WP_010911281.1 USDA_110|WP_028175224.1 113_2|113-2GL002347	flagellar basal body-associated protein flil	N
	Core cluster	USDA205|WP_014330548.1 Sm2011|AGG72762.1 7653R|AID33620.1 MAFF303099|WP_010912681.1 USDA_110|WP_011083507.1 113_2|113-2GL000158	ATP binding to DnaK triggers the release of the substrate protein, thus completing the reaction cycle. Several rounds of ATP-dependent interactions between DnaJ, DnaK and GrpE are required for fully efficient folding. Also involved, together with DnaK and GrpE, in the D- replication of plasmids through activation of initiation proteins (By similarity)	O
	Core cluster	USDA205|WP_014327962.1 Sm2011|AGG73824.1 7653R|AID29590.1 MAFF303099|WP_010915637.1 USDA_110|WP_011087725.1 113_2|113-2GL004309	30S ribosomal protein S9	J
	Core cluster	USDA205|WP_014328859.1 Sm2011|AGG74658.1 7653R|AID30853.2 MAFF303099|WP_010910140.1 USDA_110|WP_011089237.1 113_2|113-2GL002749	Alpha-keto-beta-hydroxylacyl reductoisomerase	E
	Core cluster	USDA205|WP_037391799.1 Sm2011|AGG73001.1 7653R|AID33719.1 MAFF303099|WP_010912757.1 USDA_110|WP_038966077.1 113_2|113-2GL001069	Formation of pseudouridine at positions 38, 39 and 40 in the anticodon stem and loop of transfer R-s (By similarity)	J
	Core cluster	USDA205|WP_037393677.1 Sm2011|AGG75322.1 7653R|AID33008.1 MAFF303099|WP_010912016.1 USDA_110|WP_011090137.1 113_2|113-2GL001757	Catalyzes the reversible conversion of 3- phosphohydroxypyruvate to phosphoserine and of 3-hydroxy-2-oxo-4- phosphonooxybutanoate to phosphohydroxythreonine (By similarity)	E
	Core cluster	USDA205|WP_014329996.1 Sm2011|AGG72136.1 7653R|AID31550.1 MAFF303099|WP_010910777.1 USDA_110|WP_011089492.1 113_2|113-2GL002471	Domain of unknown function (DU1801)	S
	Core cluster	USDA205|WP_014328903.1 Sm2011|AGG74704.1 7653R|AID30889.1 MAFF303099|WP_010910171.1 USDA_110|WP_038966261.1 113_2|113-2GL005691	Domain of unknown function DUF87	S
	Core cluster	USDA205|WP_014329147.1 Sm2011|AGG74966.1 7653R|AID32159.2 MAFF303099|WP_010911186.1 USDA_110|WP_011085244.1 113_2|113-2GL007167	Metallophosphoesterase	S
	Core cluster	USDA205|WP_012708193.1 Sm2011|AGG74395.1 7653R|AID30287.1 MAFF303099|WP_010909658.1 USDA_110|WP_027544155.1 113_2|113-2GL006476	dihydroneopterin aldolase	H
	Core cluster	USDA205|WP_014328343.1 Sm2011|AGG74224.1 7653R|AID29939.1 MAFF303099|WP_010909302.1 USDA_110|WP_011087712.1 113_2|113-2GL004322	glutamine synthetase	E
	Core cluster	USDA205|WP_037398686.1 Sm2011|AGG75935.1 7653R|AID33442.2 MAFF303099|WP_010912470.1 USDA_110|WP_011083459.1 113_2|113-2GL000208	Specifically methylates the N7 position of guanine in position 527 of 16S rR- (By similarity)	M
	Core cluster	USDA205|WP_012708843.1 Sm2011|AGG74948.1 7653R|AID32109.1 MAFF303099|WP_010911143.1 USDA_110|WP_011085422.1 113_2|113-2GL006927	Involved in the modulation of the specificity of the ClpAP-mediated ATP-dependent protein degradation (By similarity)	O
	Core cluster	USDA205|WP_037397722.1 Sm2011|AGG70112.1 7653R|AID33738.1 MAFF303099|WP_010912775.1 USDA_110|WP_011086605.1 113_2|113-2GL005685	Peptide synthase	S
	Core cluster	USDA205|WP_153451282.1 Sm2011|AGG73694.1 7653R|AID29062.2 MAFF303099|WP_010915133.1 USDA_110|WP_011087175.1 113_2|113-2GL004969	Proline imino-peptidase	E
	Core cluster	USDA205|WP_012709319.1 Sm2011|AGG75365.1 7653R|AID33051.1 MAFF303099|WP_010912060.1 USDA_110|WP_011084323.1 113_2|113-2GL008073	50s ribosomal protein l31	J
	Core cluster	USDA205|WP_037432984.1 Sm2011|AGG74459.1 7653R|AID31213.1 MAFF303099|WP_010910462.1 USDA_110|WP_011088050.1 113_2|113-2GL003960	short-chain dehydrogenase reductase	S
	Core cluster	USDA205|WP_037392735.1 Sm2011|AGG73408.1 7653R|AID34215.1 MAFF303099|WP_010913197.1 USDA_110|WP_028170828.1 113_2|113-2GL005785	Mrp Nbp35 family protein	D
	Core cluster	USDA205|WP_037393932.1 Sm2011|AGG75820.1 7653R|AID33340.1 MAFF303099|WP_010912365.1 USDA_110|WP_011083292.1 113_2|113-2GL000408	ABC transporter (permease)	V
	Core cluster	USDA205|WP_037395629.1 Sm2011|AGG72005.1 7653R|AID31294.1 MAFF303099|WP_010910531.1 USDA_110|WP_011085006.1 113_2|113-2GL007472	Molybdopterin dehydrogenase FAD-binding	F
	Core cluster	USDA205|WP_014327199.1 Sm2011|AGG73094.1 7653R|AID27888.1 MAFF303099|WP_010913390.1 USDA_110|WP_011083915.1 113_2|113-2GL008531	Plays a role in the regulation of phosphate uptake (By similarity)	P
	Core cluster	USDA205|WP_014329318.1 Sm2011|AGG75081.1 7653R|AID30962.2 MAFF303099|WP_010910232.1 USDA_110|WP_011090335.1 113_2|113-2GL001530	Short-chain dehydrogenase reductase SDR	S
	Core cluster	USDA205|WP_037402679.1 Sm2011|AGG72516.1 7653R|AID29301.1 MAFF303099|WP_010915388.1 USDA_110|WP_011085346.1 113_2|113-2GL007050	Blue (Type 1) copper domain protein	C
	Core cluster	USDA205|WP_014329070.1 Sm2011|AGG74906.1 7653R|QGU20678.1 MAFF303099|WP_010910943.1 USDA_110|WP_011090084.1 113_2|113-2GL001817	Sigma factors are initiation factors that promote the attachment of R- polymerase to specific initiation sites and are then released (By similarity)	K
	Core cluster	USDA205|WP_037435840.1 Sm2011|AGG73423.1 7653R|AID28758.1 MAFF303099|WP_044549725.1 USDA_110|WP_011085312.1 113_2|113-2GL007089	TPR domain protein	S
	Core cluster	USDA205|WP_014327839.1 Sm2011|AGG73733.1 7653R|AID29122.1 MAFF303099|WP_010915183.1 USDA_110|WP_011086881.1 113_2|113-2GL005371	permease yjgp yjgq	S
	Core cluster	USDA205|WP_037392684.1 Sm2011|AGG73460.1 7653R|AID28789.2 MAFF303099|WP_013532792.1 USDA_110|WP_008132970.1 113_2|113-2GL006909	Bidirectionally degrades single-stranded D- into large acid-insoluble oligonucleotides, which are then degraded further into small acid-soluble oligonucleotides (By similarity)	L
	Core cluster	USDA205|WP_012707766.1 Sm2011|AGG73950.1 7653R|AID29912.1 MAFF303099|WP_010909283.1 USDA_110|WP_011088138.1 113_2|113-2GL003867	This protein binds to the 23S rR-, and is important in its secondary structure. It is located near the subunit interface in the base of the L7 L12 stalk, and near the tR- binding site of the peptidyltransferase center (By similarity)	J
	Core cluster	USDA205|WP_037391986.1 Sm2011|AGG73190.1 7653R|AID27979.1 MAFF303099|WP_010914064.1 USDA_110|WP_011084074.1 113_2|113-2GL008338	Catalyzes the sequential -D-dependent oxidations of L- histidinol to L-histidinaldehyde and then to L-histidine (By similarity)	E
	Core cluster	USDA205|WP_037430759.1 Sm2011|AGG73511.1 7653R|AID28836.1 MAFF303099|WP_010914919.1 USDA_110|WP_063921419.1 113_2|113-2GL007073	pyruvate phosphate dikinase	G
	Core cluster	USDA205|WP_012707743.1 Sm2011|AGG73923.1 7653R|AID29883.1 MAFF303099|WP_010909262.1 USDA_110|WP_011088164.1 113_2|113-2GL003837	This protein binds directly to 23S ribosomal R- (By similarity)	J
	Core cluster	USDA205|WP_014328345.1 Sm2011|AGG74221.1 7653R|AID29749.1 MAFF303099|WP_010909158.1 USDA_110|WP_028175425.1 113_2|113-2GL003617	Acts on guanine, xanthine and to a lesser extent hypoxanthine (By similarity)	F
	Core cluster	USDA205|WP_011975176.1 Sm2011|AGG73943.1 7653R|AID29905.1 MAFF303099|WP_006205459.1 USDA_110|WP_011088144.1 113_2|113-2GL003860	50S ribosomal protein L29	J
	Core cluster	USDA205|WP_153451819.1 Sm2011|AGG74928.1 7653R|AID32048.2 MAFF303099|WP_032933687.1 USDA_110|WP_038967291.1 113_2|113-2GL001687	Transcriptional regulator	K
	Core cluster	USDA205|WP_037393941.1 Sm2011|AGG75815.1 7653R|AID33345.1 MAFF303099|WP_010912371.1 USDA_110|WP_038965096.1 113_2|113-2GL000330	Protein of unknown function (DUF1232)	S
	Core cluster	USDA205|WP_060563365.1 Sm2011|AGG75859.1 7653R|AID32985.2 MAFF303099|WP_044548382.1 USDA_110|WP_011082991.1 113_2|113-2GL000731	Helicase	L
	Core cluster	USDA205|WP_014327592.1 Sm2011|AGG73481.1 7653R|AID28803.2 MAFF303099|WP_032929369.1 USDA_110|WP_162185888.1 113_2|113-2GL008451	invasion associated locus B	S
	Core cluster	USDA205|WP_037398289.1 Sm2011|AGG72747.1 7653R|AID32480.2 MAFF303099|WP_032931658.1 USDA_110|WP_038965134.1 113_2|113-2GL000149	endonuclease III	L
	Core cluster	USDA205|WP_014330017.1 Sm2011|AGG75603.1 7653R|AID30218.1 MAFF303099|WP_010909601.1 USDA_110|WP_011085224.1 113_2|113-2GL007190	ABC transporter	E
	Core cluster	USDA205|WP_014328360.1 Sm2011|AGG74206.1 7653R|AID29954.1 MAFF303099|WP_032933407.1 USDA_110|WP_011084228.1 113_2|113-2GL008175	GCN5-related N-acetyltransferase	K
	Core cluster	USDA205|WP_037435718.1 Sm2011|AGG74544.1 7653R|AID30790.1 MAFF303099|WP_010910116.1 USDA_110|WP_011086047.1 113_2|113-2GL006259	cobaltochelatase subunit CobN	H
	Core cluster	USDA205|WP_037392973.1 Sm2011|AGG74324.1 7653R|AID29643.1 MAFF303099|WP_010909056.1 USDA_110|WP_011087103.1 113_2|113-2GL005114	Catalyzes the attachment of tyrosine to tR-(Tyr) in a two-step reaction tyrosine is first activated by ATP to form Tyr- AMP and then transferred to the acceptor end of tR-(Tyr) (By similarity)	J
	Core cluster	USDA205|WP_153451531.1 Sm2011|AGG74309.1 7653R|AID30480.1 MAFF303099|WP_010909772.1 USDA_110|WP_038967114.1 113_2|113-2GL005081	Poly(R)-hydroxyalkanoic acid synthase class I	I
	Core cluster	USDA205|WP_037393566.1 Sm2011|AGG75388.1 7653R|AID32325.1 MAFF303099|WP_010911343.1 USDA_110|WP_038967940.1 113_2|113-2GL007598	Para-aminobenzoate synthase	E
	Core cluster	USDA205|WP_037398331.1 Sm2011|AGG72724.1 7653R|AID27853.1 MAFF303099|WP_032932922.1 USDA_110|WP_011084254.1 113_2|113-2GL008145	Pilus assembly protein	U
	Dispensable cluster	USDA205|WP_034859623.1 MAFF303099|WP_010913994.1 USDA_110|WP_014497729.1 113_2|113-2GL007547 USDA_110|WP_011084940.1 113_2|113-2GL007546	short-chain type dehydrogenase reductase	S
	Core cluster	USDA205|WP_014328105.1 USDA_110|WP_038965504.1 113_2|113-2GL002054 Sm2011|AGG74549.1 7653R|AID30032.2 MAFF303099|WP_010909426.1	Alpha Beta Hydrolase Fold protein	S
	Core cluster	USDA205|WP_060563783.1 Sm2011|AGG74924.1 7653R|AID32045.2 MAFF303099|WP_010911085.1 USDA_110|WP_011083722.1 113_2|113-2GL008745	Beta-lactamase domain protein	S
	Core cluster	USDA205|WP_014329100.1 Sm2011|AGG74935.1 7653R|AID32059.1 MAFF303099|WP_044550834.1 USDA_110|WP_038967285.1 113_2|113-2GL001702	Transfers the N-acyl diglyceride group on what will become the N-terminal cysteine of membrane lipoproteins (By similarity)	M
	Core cluster	USDA205|WP_037435190.1 Sm2011|AGG75427.1 7653R|AID33141.1 MAFF303099|WP_010912167.1 USDA_110|WP_011083084.1 113_2|113-2GL000637	LysR family transcriptional regulator	K
	Core cluster	USDA205|WP_153451842.1 Sm2011|AGG74760.1 7653R|AID30979.1 MAFF303099|WP_010910250.1 USDA_110|WP_011089338.1 113_2|113-2GL002634	Essential cell division protein (By similarity)	M
	Core cluster	USDA205|WP_014329134.1 Sm2011|AGG74951.1 7653R|AID32078.1 MAFF303099|WP_010911114.1 USDA_110|WP_011090171.1 113_2|113-2GL001710	MaoC domain protein dehydratase	I
	Core cluster	USDA205|WP_037433194.1 Sm2011|AGG71005.1 7653R|AID32718.2 MAFF303099|WP_010911744.1 USDA_110|WP_011090560.1 113_2|113-2GL001271	transcriptional Regulator, LysR family	K
	Core cluster	USDA205|WP_037393410.1 Sm2011|AGG74116.1 7653R|AID30530.2 MAFF303099|WP_010909883.1 USDA_110|WP_011087505.1 113_2|113-2GL004556	ATP-dependent protease subunit	S
	Core cluster	USDA205|WP_014329802.1 Sm2011|AGG75428.1 7653R|AID33144.1 MAFF303099|WP_010912170.1 USDA_110|WP_011083082.1 113_2|113-2GL000639	aldo keto reductase	C
	Core cluster	USDA205|WP_037435833.1 Sm2011|AGG73459.1 7653R|AID28792.1 MAFF303099|WP_010914876.1 USDA_110|WP_011083635.1 113_2|113-2GL000020	pirin domain protein	S
	Core cluster	USDA205|WP_153451880.1 Sm2011|AGG75882.1 7653R|AID29457.1 MAFF303099|WP_010915532.1 USDA_110|WP_011084139.1 113_2|113-2GL008279	Involved in Beta-(1-- 2)glucan export. Transmembrane domains (TMD) form a pore in the inner membrane and the ATP- binding domain (NBD) is responsible for energy generation (By similarity)	H
	Core cluster	USDA205|WP_037394472.1 Sm2011|AGG75048.1 7653R|AID31038.1 MAFF303099|WP_010910308.1 USDA_110|WP_011085622.1 113_2|113-2GL006703	ABC transporter	P
	Core cluster	USDA205|WP_037398698.1 Sm2011|AGG72584.1 7653R|AID33451.1 MAFF303099|WP_010912479.1 USDA_110|WP_039187079.1 113_2|113-2GL001744	shikimate dehydrogenase	E
	Core cluster	USDA205|WP_014327233.1 Sm2011|AGG73132.1 7653R|AID27922.1 MAFF303099|WP_010913424.1 USDA_110|WP_011084012.1 113_2|113-2GL008426	two component transcriptional regulator, LuxR family	T
	Core cluster	USDA205|WP_014330142.1 Sm2011|AGG75835.1 7653R|AID33322.1 MAFF303099|WP_010912349.1 USDA_110|WP_011083303.1 113_2|113-2GL000396	probably involved in intracellular septation (By similarity)	D
	Core cluster	USDA205|WP_037398154.1 Sm2011|AGG72618.1 7653R|AID33935.1 MAFF303099|WP_010912935.1 USDA_110|WP_011083579.1 113_2|113-2GL000077	Uncharacterised P-loop hydrolase UPF0079	S
	Core cluster	USDA205|WP_041409417.1 Sm2011|AGG75330.1 7653R|AID33019.1 MAFF303099|WP_010912026.1 USDA_110|WP_038965498.1 113_2|113-2GL002044	Involved in the TonB-independent uptake of proteins (By similarity)	U
	Core cluster	USDA205|WP_037393421.1 Sm2011|AGG74104.1 7653R|AID30542.1 MAFF303099|WP_010909895.1 USDA_110|WP_011087522.1 113_2|113-2GL004539	Beta-N-acetylhexosaminidase (EC 3.2.1.52)	G
	Core cluster	USDA205|WP_014328910.1 Sm2011|AGG74713.1 7653R|AID30897.2 MAFF303099|WP_010910179.1 USDA_110|WP_011089249.1 113_2|113-2GL002735	hflk protein	O
	Core cluster	USDA205|WP_014330095.1 Sm2011|AGG75762.1 7653R|AID33104.2 MAFF303099|WP_010912110.1 USDA_110|WP_011083264.1 113_2|113-2GL000439	Specifically methylates the pseudouridine at position 1915 (m3Psi1915) in 23S rR- (By similarity)	S
	Core cluster	USDA205|WP_014329503.1 Sm2011|AGG75199.1 7653R|AID32630.1 MAFF303099|WP_044550932.1 USDA_110|WP_038965357.1 113_2|113-2GL008182	peptidase	M
	Dispensable cluster	USDA205|WP_037394296.1 7653R|AID34051.1 MAFF303099|WP_010912528.1 USDA_110|WP_011089747.1 113_2|113-2GL002202 MAFF303099|WP_010913041.1	Catalyzes the desulfonation of aliphatic sulfonates (By similarity)	C
	Core cluster	USDA205|WP_037428395.1 Sm2011|AGG72459.1 7653R|AID29944.2 MAFF303099|WP_044550377.1 USDA_110|WP_011088112.1 113_2|113-2GL003897	propionyl-CoA carboxylase beta	I
	Core cluster	USDA205|WP_014327692.1 Sm2011|AGG73564.1 7653R|AID28937.1 MAFF303099|WP_010915012.1 USDA_110|WP_011083208.1 113_2|113-2GL000499	oligopeptidase B EC 3.4.21.83	E
	Core cluster	USDA205|WP_037435152.1 Sm2011|AGG71860.1 7653R|AID31701.2 MAFF303099|WP_010914154.1 USDA_110|WP_011086242.1 113_2|113-2GL006059	Catalyzes the formation of acetyl phosphate from acetate and ATP. Can also catalyze the reverse reaction (By similarity)	C
	Core cluster	USDA205|WP_014330086.1 Sm2011|AGG75754.1 7653R|AID33116.1 MAFF303099|WP_010912120.1 USDA_110|WP_011083253.1 113_2|113-2GL000450	50S ribosomal protein L27	J
	Core cluster	USDA205|WP_060563583.1 Sm2011|AGG72615.1 7653R|AID33932.1 MAFF303099|WP_010912932.1 USDA_110|WP_063921368.1 113_2|113-2GL000081	helicase	L
	Core cluster	USDA205|WP_014328339.1 Sm2011|AGG74228.1 7653R|AID30051.1 MAFF303099|WP_010909444.1 USDA_110|WP_011088524.1 113_2|113-2GL003428	DsbA oxidoreductase	Q
	Core cluster	USDA205|WP_080579105.1 Sm2011|AGG72286.1 7653R|AID33987.2 MAFF303099|WP_010912984.1 USDA_110|WP_011085807.1 113_2|113-2GL006511	Phage SPO1 D- polymerase-related protein	L
	Core cluster	USDA205|WP_014328337.1 Sm2011|AGG74236.1 7653R|AID30324.1 MAFF303099|WP_010909690.1 USDA_110|WP_011087373.1 113_2|113-2GL004728	TPR repeat family protein	S
	Core cluster	USDA205|WP_037435970.1 Sm2011|AGG71587.1 USDA_110|WP_011086432.1 113_2|113-2GL005872 7653R|AID28859.1 MAFF303099|WP_010914947.1	ABC transporter	E
	Core cluster	USDA205|WP_037436934.1 Sm2011|AGG72819.1 7653R|AID34325.1 MAFF303099|WP_010913322.1 USDA_110|WP_011083605.1 113_2|113-2GL000050	One of the essential components for the initiation of protein synthesis. Protects formylmethionyl-tR- from spontaneous hydrolysis and promotes its binding to the 30S ribosomal subunits. Also involved in the hydrolysis of GTP during the formation of the 70S ribosomal complex (By similarity)	J
	Core cluster	USDA205|WP_037393580.1 Sm2011|AGG75379.1 7653R|AID32957.1 MAFF303099|WP_010911969.1 USDA_110|WP_038967322.1 113_2|113-2GL001595	TPR repeat-containing protein	S
	Core cluster	USDA205|WP_003525618.1 Sm2011|AGG75067.1 7653R|AID33795.1 MAFF303099|WP_010912829.1 USDA_110|WP_007605424.1 113_2|113-2GL008126	Urea amidohydrolase subunit gamma	E
	Core cluster	USDA205|WP_014328040.1 Sm2011|AGG73900.1 7653R|AID29806.2 MAFF303099|WP_010909209.1 USDA_110|WP_011087064.1 113_2|113-2GL005159	Acetyl-CoA carboxylase, biotin carboxyl carrier protein	I
	Dispensable cluster	USDA205|WP_037434067.1 MAFF303099|WP_010910603.1 USDA205|WP_037435291.1 Sm2011|AGG70805.1 USDA_110|WP_011083104.1 113_2|113-2GL000613	Inherit from bactNOG: secreted protein	S
	Core cluster	USDA205|WP_014330408.1 Sm2011|AGG72621.1 7653R|AID33938.1 MAFF303099|WP_010912938.1 USDA_110|WP_011090869.1 113_2|113-2GL001027	phosphocarrier protein HPr	G
	Core cluster	USDA205|WP_037396511.1 Sm2011|AGG74364.1 7653R|AID29684.1 MAFF303099|WP_010909094.1 USDA_110|WP_011088464.1 113_2|113-2GL003498	phosphoribosylformylglycinamidine synthase ii	F
	Core cluster	USDA205|WP_060563536.1 Sm2011|AGG75577.1 7653R|AID30589.1 MAFF303099|WP_010909925.1 USDA_110|WP_011083169.1 113_2|113-2GL000542	Carbon monoxide dehydrogenase, medium	C
	Dispensable cluster	USDA205|WP_153451256.1 Sm2011|AGG75360.1 USDA205|WP_037395926.1 USDA_110|WP_051000417.1 113_2|113-2GL001457 MAFF303099|WP_010912144.1	Adenylate	F
	Core cluster	USDA205|WP_037393643.1 Sm2011|AGG75341.1 7653R|AID33029.1 MAFF303099|WP_010912035.1 USDA_110|WP_011084352.1 113_2|113-2GL008041	The RuvA-RuvB complex in the presence of ATP renatures cruciform structure in supercoiled D- with palindromic sequence, indicating that it may promote strand exchange reactions in homologous recombination. RuvAB is a helicase that mediates the Holliday junction migration by localized denaturation and reannealing. RuvA stimulates, in the presence of D-, the weak ATPase activity of RuvB (By similar…	L
	Core cluster	USDA205|WP_080577651.1 Sm2011|AGG72729.1 7653R|AID27857.2 MAFF303099|WP_044548885.1 USDA_110|WP_011084250.1 113_2|113-2GL008149	repeat protein	U
	Core cluster	USDA205|WP_037435871.1 Sm2011|AGG75836.1 7653R|QGU20634.1 MAFF303099|WP_044548471.1 USDA_110|WP_011083304.1 113_2|113-2GL000395	Involved in targeting and insertion of nascent membrane proteins into the cytoplasmic membrane. Acts as a receptor for the complex formed by the signal recognition particle (SRP) and the ribosome-nascent chain (RNC). Interaction with SRP-RNC leads to the transfer of the RNC complex to the Sec translocase for insertion into the membrane, the hydrolysis of GTP by both Ffh and FtsY, and the dissocia…	U
	Core cluster	USDA205|WP_014329645.1 Sm2011|AGG75310.1 7653R|AID32171.2 MAFF303099|WP_010911198.1 USDA_110|WP_007600538.1 113_2|113-2GL007499	response regulator	T
	Core cluster	USDA205|WP_037396212.1 Sm2011|AGG71730.1 7653R|AID32946.1 MAFF303099|WP_010911958.1 113_2|113-2GL007970 USDA_110|WP_011084494.1	amino acid ABC transporter	E
	Core cluster	USDA205|WP_014328019.1 Sm2011|AGG73881.1 7653R|AID30194.1 MAFF303099|WP_010909585.1 USDA_110|WP_011087864.1 113_2|113-2GL004167	D- protecting protein DprA	L
	Core cluster	USDA205|WP_014328522.1 Sm2011|AGG74411.1 7653R|AID32096.2 MAFF303099|WP_032933697.1 USDA_110|WP_038967182.1 113_2|113-2GL003447	-	-
	Core cluster	USDA205|WP_037433199.1 Sm2011|AGG70715.1 7653R|AID28093.1 MAFF303099|WP_032929095.1 USDA_110|WP_011089566.1 113_2|113-2GL002389	2-haloalkanoic acid dehalogenase	S
	Core cluster	USDA205|WP_037394631.1 Sm2011|AGG75269.1 7653R|AID32752.2 MAFF303099|WP_010911782.1 USDA_110|WP_028175815.1 113_2|113-2GL000700	Catalyzes the specific phosphorylation of the 3-hydroxyl group of shikimic acid using ATP as a cosubstrate (By similarity)	E
	Core cluster	USDA205|WP_037430450.1 Sm2011|AGG71823.1 7653R|AID29542.1 MAFF303099|WP_010915601.1 USDA_110|WP_038966485.1 113_2|113-2GL002757	ABC transporter	E
	Core cluster	USDA205|WP_014327815.1 Sm2011|AGG73702.1 7653R|AID29090.1 MAFF303099|WP_010915156.1 USDA_110|WP_011086835.1 113_2|113-2GL005424	short-chain dehydrogenase reductase	S
	Core cluster	USDA205|WP_014329098.1 Sm2011|AGG74932.1 7653R|AID28021.1 MAFF303099|WP_010914096.1 USDA_110|WP_038967289.1 113_2|113-2GL001693	Pyrroline-5-carboxylate reductase	E
	Core cluster	USDA205|WP_037393506.1 Sm2011|AGG75415.1 7653R|AID32354.1 MAFF303099|WP_010911371.1 USDA_110|WP_011090455.1 113_2|113-2GL001384	N-formylglutamate amidohydrolase	E
	Core cluster	USDA205|WP_014764680.1 Sm2011|AGG74153.1 7653R|AID31968.1 MAFF303099|WP_008877613.1 USDA_110|WP_011090113.1 113_2|113-2GL001782	Necessary for efficient R- polymerase transcription elongation past template-encoded arresting sites. The arresting sites in D- have the property of trapping a certain fraction of elongating R- polymerases that pass through, resulting in locked ternary complexes. Cleavage of the nascent transcript by cleavage factors such as GreA or GreB allows the resumption of elongation from the new 3'terminus…	K
	Core cluster	USDA205|WP_014327594.1 Sm2011|AGG73483.1 7653R|AID28805.1 MAFF303099|WP_010914889.1 USDA_110|WP_011083990.1 113_2|113-2GL008449	Cytochrome C oxidase subunit I	C
	Core cluster	USDA205|WP_037396773.1 Sm2011|AGG74899.1 7653R|AID31826.1 MAFF303099|WP_010910899.1 USDA_110|WP_038965070.1 113_2|113-2GL000389	membrane	S
	Dispensable cluster	Sm2011|AGG72796.1 7653R|AID33707.1 USDA_110|WP_063921525.1 USDA_110|WP_011087740.1 113_2|113-2GL004292 MAFF303099|WP_010912745.1	monooxygenase, FAD-binding	C, H
	Core cluster	USDA205|WP_037399723.1 Sm2011|AGG72561.1 7653R|AID33228.1 MAFF303099|WP_010912253.1 USDA_110|WP_011090545.1 113_2|113-2GL001286	3-hydroxyacyl-COA dehydrogenase	I
	Core cluster	USDA205|WP_080578994.1 Sm2011|AGG72461.1 7653R|AID28915.1 MAFF303099|WP_044549788.1 USDA_110|WP_011085838.1 113_2|113-2GL006480	Methylmalonyl-CoA mutase	I
	Core cluster	USDA205|WP_014327870.1 Sm2011|AGG73767.1 7653R|QGU20884.1 MAFF303099|WP_010915253.1 USDA_110|WP_011086897.1 113_2|113-2GL005353	chromosomal replication initiator	L
	Core cluster	USDA205|WP_014327042.1 Sm2011|AGG72958.1 7653R|AID32515.1 MAFF303099|WP_010911507.1 USDA_110|WP_011083503.1 113_2|113-2GL000162	Participates actively in the response to hyperosmotic and heat shock by preventing the aggregation of stress-denatured proteins, in association with DnaK and GrpE. It is the nucleotide exchange factor for DnaK and may function as a thermosensor. Unfolded proteins bind initially to DnaJ	O
	Core cluster	USDA205|WP_014327905.1 Sm2011|AGG73800.1 7653R|AID29545.1 MAFF303099|WP_044550233.1 USDA_110|WP_028171637.1 113_2|113-2GL004260	SmpA / OmlA family	J
	Core cluster	USDA205|WP_037402826.1 Sm2011|AGG74703.1 7653R|QGU20738.1 MAFF303099|WP_010910161.1 USDA_110|WP_011089243.1 113_2|113-2GL002742	Acetolactate synthase	E
	Core cluster	USDA205|WP_014330354.1 Sm2011|AGG75926.1 7653R|AID33146.1 MAFF303099|WP_010912172.1 USDA_110|WP_028174953.1 113_2|113-2GL000269	Catalyzes the conversion of acetate into acetyl-CoA (AcCoA), an essential intermediate at the junction of anabolic and catabolic pathways. AcsA undergoes a two-step reaction. In the first half reaction, AcsA combines acetate with ATP to form acetyl-adenylate (AcAMP) intermediate. In the second half reaction, it can then transfer the acetyl group from AcAMP to the sulfhydryl group of CoA, forming …	I
	Core cluster	USDA205|WP_014328403.1 Sm2011|AGG74321.1 7653R|AID29649.1 MAFF303099|WP_027046762.1 USDA_110|WP_008143006.1 113_2|113-2GL005109	Alpha beta hydrolase	S
	Core cluster	USDA205|WP_037396705.1 Sm2011|AGG74940.1 7653R|AID32064.1 MAFF303099|WP_010911102.1 USDA_110|WP_028174674.1 113_2|113-2GL001698	Phosphoribosyl pyrophosphate synthase	F
	Core cluster	USDA205|WP_014329094.1 Sm2011|AGG74930.1 7653R|AID32050.1 MAFF303099|WP_044550831.1 USDA_110|WP_011090196.1 113_2|113-2GL001685	Histidine kinase	T
	Core cluster	USDA205|WP_060563368.1 Sm2011|AGG75664.1 7653R|AID33250.2 MAFF303099|WP_010912275.1 USDA_110|WP_011083397.1 113_2|113-2GL000274	#NAME?	C
	Core cluster	USDA205|WP_037394235.1 Sm2011|AGG75417.1 7653R|AID34176.2 MAFF303099|WP_010913162.1 USDA_110|WP_011087307.1 113_2|113-2GL004800	Dihydroxy-acid dehydratase	E
	Core cluster	USDA205|WP_060563187.1 Sm2011|AGG73098.1 7653R|AID27892.1 MAFF303099|WP_010913394.1 USDA_110|WP_011083918.1 113_2|113-2GL008527	ornithine carbamoyltransferase	E
	Core cluster	USDA205|WP_037399664.1 Sm2011|AGG72992.1 7653R|AID34320.1 MAFF303099|WP_044551168.1 USDA_110|WP_011083610.1 113_2|113-2GL000045	Catalyzes the formation of N(7)-methylguanine at position 46 (m7G46) in tR- (By similarity)	S
	Core cluster	USDA205|WP_037393714.1 Sm2011|AGG75639.1 7653R|AID33305.2 MAFF303099|WP_010912331.1 USDA_110|WP_011083283.1 113_2|113-2GL000419	Dihydrolipoamide succinyltransferase	C
	Core cluster	USDA205|WP_014327986.1 Sm2011|AGG73846.1 7653R|AID30784.1 MAFF303099|WP_010910110.1 USDA_110|WP_011087683.1 113_2|113-2GL004358	NDH-1 shuttles electrons from -DH, via FMN and iron- sulfur (Fe-S) centers, to quinones in the respiratory chain. The immediate electron acceptor for the enzyme in this species is believed to be ubiquinone. Couples the redox reaction to proton translocation (for every two electrons transferred, four hydrogen ions are translocated across the cytoplasmic membrane), and thus conserves the redox ener…	C
	Core cluster	USDA205|WP_037435388.1 Sm2011|AGG72998.1 7653R|AID33723.1 MAFF303099|WP_032932506.1 USDA_110|WP_028175976.1 113_2|113-2GL001066	RmuC domain protein	S
	Core cluster	USDA205|WP_037395402.1 Sm2011|AGG74546.1 7653R|AID30737.2 MAFF303099|WP_010910066.1 USDA_110|WP_038966032.1 113_2|113-2GL006266	Adenosylcobinamide kinase	H
	Core cluster	USDA205|WP_037393355.1 Sm2011|AGG74301.1 7653R|AID29775.1 MAFF303099|WP_044547469.1 USDA_110|WP_011087183.1 113_2|113-2GL004953	Uncharacterized ACR, COG1430	S
	Core cluster	USDA205|WP_080577672.1 Sm2011|AGG75939.1 7653R|AID33447.2 MAFF303099|WP_044548520.1 USDA_110|WP_011083463.1 113_2|113-2GL000203	membrane	S
	Core cluster	USDA205|WP_037393883.1 Sm2011|AGG75839.1 7653R|QGU20926.1 MAFF303099|WP_010912390.1 USDA_110|WP_038965072.1 113_2|113-2GL000387	Involved in targeting and insertion of nascent membrane proteins into the cytoplasmic membrane. Binds to the hydrophobic signal sequence of the ribosome-nascent chain (RNC) as it emerges from the ribosomes. The SRP-RNC complex is then targeted to the cytoplasmic membrane where it interacts with the SRP receptor FtsY. Interaction with FtsY leads to the transfer of the RNC complex to the Sec transl…	U
	Core cluster	USDA205|WP_037395082.1 Sm2011|AGG70537.1 7653R|AID28219.1 MAFF303099|WP_010914305.1 USDA_110|WP_038966764.1 113_2|113-2GL002885	Two component LuxR family transcriptional regulator	T
	Core cluster	USDA205|WP_014328654.1 Sm2011|AGG74496.1 7653R|AID30595.2 MAFF303099|WP_010909931.1 USDA_110|WP_011088674.1 113_2|113-2GL003271	hydrolase	Q
	Core cluster	USDA205|WP_012707765.1 Sm2011|AGG73949.1 7653R|AID29911.1 MAFF303099|WP_006205453.1 USDA_110|WP_011088139.1 113_2|113-2GL003866	One of the primary rR- binding proteins, it binds directly to 16S rR- central domain where it helps coordinate assembly of the platform of the 30S subunit (By similarity)	J
	Core cluster	USDA205|WP_060564133.1 Sm2011|AGG69779.1 7653R|AID29515.1 MAFF303099|WP_044550210.1 USDA_110|WP_038965809.1 113_2|113-2GL006729	polyphosphate kinase 2	S
	Core cluster	USDA205|WP_037393483.1 Sm2011|AGG74037.1 7653R|AID29988.1 MAFF303099|WP_010909343.1 USDA_110|WP_011087259.1 113_2|113-2GL004867	Signal transduction histidine kinase, nitrogen specific, NtrB	T
	Core cluster	USDA205|WP_037393736.1 Sm2011|AGG75636.1 7653R|AID33303.1 MAFF303099|WP_010912328.1 USDA_110|WP_038965061.1 113_2|113-2GL000420	Short-chain dehydrogenase reductase SDR	S
	Core cluster	USDA205|WP_037393633.1 Sm2011|AGG75349.1 7653R|AID33064.2 MAFF303099|WP_010912072.1 USDA_110|WP_038965392.1 113_2|113-2GL008052	5-Formyltetrahydrofolate cyclo-ligase	H
	Core cluster	USDA205|WP_080577272.1 Sm2011|AGG73494.1 7653R|AID28820.1 MAFF303099|WP_010914903.1 USDA_110|WP_011084307.1 113_2|113-2GL008088	Inherit from COG: cytochrome c biogenesis protein, transmembrane region	C, O
	Core cluster	USDA205|WP_037428481.1 Sm2011|AGG72449.1 7653R|AID29936.1 MAFF303099|WP_010909300.1 USDA_110|WP_011086942.1 113_2|113-2GL005302	glutamine synthetase	E
	Core cluster	USDA205|WP_014330090.1 Sm2011|AGG75758.1 7653R|AID33111.1 MAFF303099|WP_010912116.1 USDA_110|WP_011083260.1 113_2|113-2GL000443	Catalyzes the transfer of a phosphate group to glutamate to form glutamate 5-phosphate which rapidly cyclizes to 5- oxoproline (By similarity)	E
	Core cluster	USDA205|WP_014327693.1 Sm2011|AGG73565.1 7653R|AID29697.2 MAFF303099|WP_010909108.1 USDA_110|WP_011090008.1 113_2|113-2GL001901	glyoxalase bleomycin resistance protein dioxygenase	S
	Core cluster	USDA205|WP_037401518.1 Sm2011|AGG73897.1 7653R|AID29801.1 MAFF303099|WP_010909205.1 USDA_110|WP_038966849.1 113_2|113-2GL005165	Uncharacterized protein conserved in bacteria (DUF2155)	S
	Core cluster	USDA205|WP_014330036.1 Sm2011|AGG75622.1 7653R|AID33127.1 MAFF303099|WP_010912153.1 USDA_110|WP_011083273.1 113_2|113-2GL000430	Produces ATP from ADP in the presence of a proton gradient across the membrane. The gamma chain is believed to be important in regulating ATPase activity and the flow of protons through the CF(0) complex (By similarity)	C
	Core cluster	USDA205|WP_037392642.1 Sm2011|AGG73469.1 7653R|AID30787.1 MAFF303099|WP_010910113.1 USDA_110|WP_011085206.1 113_2|113-2GL007210	Pfam:DUF1006	S
	Core cluster	USDA205|WP_037395262.1 Sm2011|AGG73278.1 7653R|AID33955.1 MAFF303099|WP_010912954.1 USDA_110|WP_011083723.1 113_2|113-2GL008744	Alpha amylase, catalytic region	G
	Core cluster	USDA205|WP_014328328.1 Sm2011|AGG74245.1 7653R|AID30131.2 MAFF303099|WP_010909525.1 USDA_110|WP_011087578.1 113_2|113-2GL004477	Indole-3-glycerol phosphate synthase	E
	Core cluster	USDA205|WP_037395251.1 Sm2011|AGG73294.1 7653R|AID28046.1 MAFF303099|WP_010914119.1 USDA_110|WP_011086587.1 113_2|113-2GL005711	extracellular solute-binding protein, family 1	G
	Core cluster	USDA205|WP_037397667.1 Sm2011|AGG74160.1 7653R|AID33762.1 MAFF303099|WP_010912797.1 USDA_110|WP_038965170.1 113_2|113-2GL000011	Mate efflux family protein	V
	Core cluster	USDA205|WP_060563203.1 Sm2011|AGG73244.1 7653R|AID32247.1 MAFF303099|WP_032931517.1 USDA_110|WP_011089609.1 113_2|113-2GL002344	Assembles around the rod to form the L-ring and probably protects the motor basal body from shearing forces during rotation (By similarity)	N
	Core cluster	USDA205|WP_014328036.1 Sm2011|AGG73896.1 7653R|AID29800.1 MAFF303099|WP_010909204.1 USDA_110|WP_011087052.1 113_2|113-2GL005173	-DH ubiquinone oxidoreductase 17.2 kD subunit	C
	Core cluster	USDA205|WP_037391213.1 Sm2011|AGG73659.1 7653R|AID32218.1 MAFF303099|WP_010911250.1 USDA_110|WP_028172917.1 113_2|113-2GL001894	R- binding S1 domain protein	K
	Core cluster	USDA205|WP_012707619.1 Sm2011|AGG73845.1 7653R|AID30785.1 MAFF303099|WP_013531090.1 USDA_110|WP_028171711.1 113_2|113-2GL004357	NDH-1 shuttles electrons from -DH, via FMN and iron- sulfur (Fe-S) centers, to quinones in the respiratory chain. The immediate electron acceptor for the enzyme in this species is believed to be ubiquinone. Couples the redox reaction to proton translocation (for every two electrons transferred, four hydrogen ions are translocated across the cytoplasmic membrane), and thus conserves the redox ener…	C
	Core cluster	USDA205|WP_014328027.1 Sm2011|AGG73889.1 7653R|AID30188.1 MAFF303099|WP_032930345.1 USDA_110|WP_028171591.1 113_2|113-2GL004178	Could be a nuclease that resolves Holliday junction intermediates in genetic recombination (By similarity)	L
	Dispensable cluster	USDA205|WP_037435671.1 Sm2011|AGG70200.1 MAFF303099|WP_157866198.1 USDA_110|WP_011086326.1 113_2|113-2GL005976 Sm2011|AGG71366.1	ABC transporter	E
	Core cluster	USDA205|WP_014327854.1 Sm2011|AGG73750.1 7653R|AID29158.1 MAFF303099|WP_010915214.1 USDA_110|WP_011090205.1 113_2|113-2GL001675	Molybdopterin converting factor subunit 1	H
	Core cluster	USDA205|WP_003507760.1 Sm2011|AGG73930.1 7653R|AID29892.1 MAFF303099|WP_006333356.1 USDA_110|WP_007603006.1 113_2|113-2GL003847	Interacts with and stabilizes bases of the 16S rR- that are involved in tR- selection in the A site and with the mR- backbone. Located at the interface of the 30S and 50S subunits, it traverses the body of the 30S subunit contacting proteins on the other side and probably holding the rR- structure together. The combined cluster of proteins S8, S12 and S17 appears to hold together the shoulder and…	J
	Core cluster	USDA205|WP_153451988.1 Sm2011|AGG72807.1 7653R|AID32507.1 MAFF303099|WP_010911498.1 USDA_110|WP_011090575.1 113_2|113-2GL001256	Transcriptional regulator	K
	Core cluster	USDA205|WP_037390994.1 Sm2011|AGG73832.1 7653R|AID29601.2 MAFF303099|WP_010915647.1 USDA_110|WP_038966466.1 113_2|113-2GL002704	cytochrome p450	Q
	Core cluster	USDA205|WP_014329853.1 Sm2011|AGG75478.1 7653R|AID33651.1 MAFF303099|WP_010912710.1 USDA_110|WP_011087273.1 113_2|113-2GL004851	binding-protein-dependent transport systems inner membrane component	P
	Core cluster	USDA205|WP_037396961.1 Sm2011|AGG74765.1 7653R|QGU20732.1 MAFF303099|WP_010910253.1 USDA_110|WP_011089341.1 113_2|113-2GL002630	Cell wall formation (By similarity)	M
	Core cluster	USDA205|WP_014327975.1 Sm2011|AGG73835.1 7653R|AID29604.1 MAFF303099|WP_010915650.1 USDA_110|WP_011087708.1 113_2|113-2GL004328	Cleaves peptides in various proteins in a process that requires ATP hydrolysis. Has a chymotrypsin-like activity. Plays a major role in the degradation of misfolded proteins (By similarity)	O
	Core cluster	USDA205|WP_014331590.1 Sm2011|AGG74828.1 7653R|AID28617.1 MAFF303099|WP_010914714.1 USDA_110|WP_011084696.1 113_2|113-2GL007775	(ABC) transporter	G
	Core cluster	USDA205|WP_060563609.1 Sm2011|AGG75903.1 7653R|AID32359.1 MAFF303099|WP_010911377.1 USDA_110|WP_011083710.1 113_2|113-2GL008757	CoA transferase having broad substrate specificity for short-chain acyl-CoA thioesters with the activity decreasing when the length of the carboxylic acid chain exceeds four carbons (By similarity)	I
	Core cluster	USDA205|WP_014329099.1 Sm2011|AGG74934.1 7653R|AID32055.1 MAFF303099|WP_010911095.1 USDA_110|WP_011090176.1 113_2|113-2GL001704	Pfam:DUF526	S
	Core cluster	USDA205|WP_037402014.1 Sm2011|AGG70901.1 7653R|AID28082.1 USDA_110|WP_011089926.1 113_2|113-2GL001998 MAFF303099|WP_044549526.1	BFD-like [2Fe-2S] binding domain	S
	Core cluster	USDA205|WP_037394625.1 Sm2011|AGG75275.1 7653R|AID32756.1 MAFF303099|WP_032931887.1 USDA_110|WP_162494184.1 113_2|113-2GL000696	ErfK YbiS YcfS YnhG family protein	S
	Core cluster	USDA205|WP_037430512.1 Sm2011|AGG71843.1 7653R|AID29450.1 MAFF303099|WP_010915526.1 USDA_110|WP_011088983.1 113_2|113-2GL002937	imidazolone-5-propionate hydrolase	Q
	Core cluster	USDA205|WP_060564017.1 Sm2011|AGG73734.1 7653R|AID29124.2 MAFF303099|WP_010915184.1 USDA_110|WP_028171097.1 113_2|113-2GL005370	Presumably involved in the processing and regular turnover of intracellular proteins. Catalyzes the removal of unsubstituted N-terminal amino acids from various peptides (By similarity)	E
	Core cluster	USDA205|WP_014330177.1 Sm2011|AGG75864.1 7653R|AID29336.2 MAFF303099|WP_044550130.1 USDA_110|WP_038966379.1 113_2|113-2GL004097	Glutathione S-Transferase	O
	Core cluster	USDA205|WP_014329263.1 Sm2011|AGG75027.1 7653R|AID32862.2 MAFF303099|WP_010911883.1 USDA_110|WP_011090521.1 113_2|113-2GL001314	R- polymerase sigma factor	K
	Core cluster	USDA205|WP_037393680.1 Sm2011|AGG75316.1 7653R|AID32892.2 MAFF303099|WP_032933831.1 USDA_110|WP_011090071.1 113_2|113-2GL001832	Pseudouridine synthase	J
	Core cluster	USDA205|WP_037394036.1 Sm2011|AGG71705.1 7653R|AID33641.1 MAFF303099|WP_010912702.1 USDA_110|WP_038966876.1 113_2|113-2GL005575	Short-chain dehydrogenase reductase SDR	S
	Core cluster	USDA205|WP_014330098.1 Sm2011|AGG75765.1 7653R|AID33100.2 MAFF303099|WP_032932117.1 USDA_110|WP_011083267.1 113_2|113-2GL000436	polysaccharide deacetylase	S
	Dispensable cluster	7653R|AID31637.1 USDA_110|WP_011085070.1 MAFF303099|WP_010910838.1 113_2|113-2GL007396 USDA_110|WP_011087336.1 113_2|113-2GL004767	4-carboxy-4-hydroxy-2-oxoadipate aldolase oxaloacetate decarboxylase	Q
	Core cluster	USDA205|WP_037393929.1 Sm2011|AGG75822.1 7653R|AID33338.2 MAFF303099|WP_010912363.1 USDA_110|WP_011083294.1 113_2|113-2GL000405	N-acetyltransferase	M
	Core cluster	USDA205|WP_014329506.1 Sm2011|AGG75202.1 7653R|AID32639.1 MAFF303099|WP_010911668.1 USDA_110|WP_038966670.1 113_2|113-2GL000669	Methylates the class 1 translation termination release factors RF1 PrfA and RF2 PrfB on the glutamine residue of the universally conserved GGQ motif (By similarity)	J
	Core cluster	USDA205|WP_003535434.1 Sm2011|AGG74043.1 7653R|AID29993.2 MAFF303099|WP_006202172.1 USDA_110|WP_007591126.1 113_2|113-2GL004862	R- chaperone that binds small regulatory R- (sR-s) and mR-s to facilitate mR- translational regulation in response to envelope stress, environmental stress and changes in metabolite concentrations. Also binds with high specificity to tR-s (By similarity)	T
	Core cluster	USDA205|WP_060563897.1 Sm2011|AGG71715.1 7653R|AID29003.1 MAFF303099|WP_044549814.1 USDA_110|WP_011087192.1 113_2|113-2GL004941	carboxylase	I
	Core cluster	USDA205|WP_037402824.1 Sm2011|AGG74708.1 7653R|AID30892.2 MAFF303099|WP_044547984.1 USDA_110|WP_011089245.1 113_2|113-2GL002739	phosphoserine phosphatase	E
	Core cluster	USDA205|WP_037393488.1 Sm2011|AGG74033.1 7653R|AID29985.1 MAFF303099|WP_010909339.1 USDA_110|WP_011087250.1 113_2|113-2GL004878	Cyclase dehydrase	I
	Core cluster	USDA205|WP_014329524.1 Sm2011|AGG75219.1 7653R|AID32668.1 MAFF303099|WP_010911695.1 USDA_110|WP_011083036.1 113_2|113-2GL000685	Part of the Sec protein translocase complex. Interacts with the SecYEG preprotein conducting channel. Has a central role in coupling the hydrolysis of ATP to the transfer of proteins into and across the cell membrane, serving both as a receptor for the preprotein-SecB complex and as an ATP-driven molecular motor driving the stepwise translocation of polypeptide chains across the membrane (By simi…	U
	Core cluster	USDA205|WP_037399518.1 Sm2011|AGG73386.1 7653R|AID29408.2 MAFF303099|WP_044551682.1 USDA_110|WP_028174621.1 113_2|113-2GL001626	peptidase U62, modulator of D- gyrase	S
	Core cluster	USDA205|WP_014329187.1 Sm2011|AGG72138.1 7653R|AID31552.1 MAFF303099|WP_032931192.1 USDA_110|WP_038965701.1 113_2|113-2GL002472	-	-
	Core cluster	USDA205|WP_037393770.1 Sm2011|AGG75799.1 7653R|AID33262.1 MAFF303099|WP_010912286.1 USDA_110|WP_011083446.1 113_2|113-2GL000222	Exodeoxyribonuclease III	L
	Core cluster	USDA205|WP_037391933.1 Sm2011|AGG73114.1 7653R|AID27873.1 MAFF303099|WP_010913375.1 USDA_110|WP_011083977.1 113_2|113-2GL008463	acyl-CoA dehydrogenase	I
	Core cluster	USDA205|WP_037435942.1 Sm2011|AGG74323.1 7653R|AID28588.1 MAFF303099|WP_010914696.1 USDA_110|WP_011087104.1 113_2|113-2GL005113	Catalyzes the specific phosphorylation of 1,6-anhydro-N- acetylmuramic acid (anhMur-c) with the simultaneous cleavage of the 1,6-anhydro ring, generating Mur-c-6-P. Is required for the utilization of anhMur-c either imported from the medium or derived from its own cell wall murein, and thus plays a role in cell wall recycling (By similarity)	O
	Core cluster	USDA205|WP_014327904.1 Sm2011|AGG73799.1 7653R|AID29544.1 MAFF303099|WP_010915603.1 USDA_110|WP_011087787.1 113_2|113-2GL004258	Proton pump that utilizes the energy of pyrophosphate hydrolysis as the driving force for proton movement across the membrane. Generates a proton motive force (By similarity)	C
	Core cluster	USDA205|WP_003536496.1 Sm2011|AGG73958.1 7653R|AID29920.1 MAFF303099|WP_006205444.1 USDA_110|WP_007603045.1 113_2|113-2GL003875	Located on the platform of the 30S subunit, it bridges several disparate R- helices of the 16S rR-. Forms part of the Shine-Dalgarno cleft in the 70S ribosome (By similarity)	J
	Core cluster	USDA205|WP_014328182.1 Sm2011|AGG74063.1 7653R|AID29781.1 MAFF303099|WP_044550358.1 USDA_110|WP_007602550.1 113_2|113-2GL003645	Protein of unknown function (DUF3126)	S
	Dispensable cluster	USDA205|WP_037436539.1 Sm2011|AGG71320.1 MAFF303099|WP_157866183.1 USDA_110|WP_162494224.1 113_2|113-2GL004196 USDA_110|WP_038966354.1	Sulfatase-modifying factor enzyme 1	S
	Core cluster	USDA205|WP_037396958.1 Sm2011|AGG74764.1 7653R|QGU20733.1 MAFF303099|WP_044548032.1 USDA_110|WP_011089340.1 113_2|113-2GL002632	Cell wall formation (By similarity)	M
	Core cluster	USDA205|WP_037391153.1 Sm2011|AGG73732.1 7653R|AID29121.1 MAFF303099|WP_010915182.1 USDA_110|WP_038966780.1 113_2|113-2GL005372	Permease, YjgP YjgQ	S
	Core cluster	USDA205|WP_037392970.1 Sm2011|AGG74325.1 7653R|AID29642.2 MAFF303099|WP_010909055.1 USDA_110|WP_028171255.1 113_2|113-2GL005121	-	-
	Core cluster	USDA205|WP_037394318.1 Sm2011|AGG75111.1 7653R|AID30506.1 MAFF303099|WP_010909862.1 USDA_110|WP_011086563.1 113_2|113-2GL005738	cytochrome c oxidase, subunit III	C
	Core cluster	USDA205|WP_037396681.1 Sm2011|AGG74451.1 7653R|AID30073.2 MAFF303099|WP_010909467.1 USDA_110|WP_063921607.1 113_2|113-2GL007340	Transfers a GMP moiety from GTP to Mo-molybdopterin (Mo- MPT) cofactor (Moco or molybdenum cofactor) to form Mo- molybdopterin guanine dinucleotide (Mo-MGD) cofactor (By similarity)	H
	Core cluster	USDA205|WP_014327992.1 Sm2011|AGG73852.1 7653R|AID30779.2 MAFF303099|WP_010910105.1 USDA_110|WP_011087677.1 113_2|113-2GL004364	#NAME?	C
	Core cluster	USDA205|WP_014330355.1 Sm2011|AGG75927.1 7653R|AID32911.1 MAFF303099|WP_044548374.1 USDA_110|WP_028173595.1 113_2|113-2GL008287	Protein of unknown function (DUF1013)	S
	Core cluster	USDA205|WP_037398020.1 Sm2011|AGG75596.1 7653R|AID34208.1 MAFF303099|WP_010913191.1 USDA_110|WP_011085920.1 113_2|113-2GL006392	Formate dehydrogenase Alpha subunit	C
	Core cluster	USDA205|WP_014330399.1 Sm2011|AGG72610.1 7653R|AID33924.1 MAFF303099|WP_010912924.1 USDA_110|WP_011083570.1 113_2|113-2GL000087	The alpha subunit is responsible for the aldol cleavage of indoleglycerol phosphate to indole and glyceraldehyde 3- phosphate (By similarity)	E
	Core cluster	USDA205|WP_037395307.1 Sm2011|AGG73254.1 7653R|AID32258.2 MAFF303099|WP_044548297.1 USDA_110|WP_011089600.1 113_2|113-2GL002353	ompa motb domain protein	N
	Core cluster	USDA205|WP_037395421.1 Sm2011|AGG74530.1 7653R|AID30735.1 MAFF303099|WP_010910064.1 USDA_110|WP_038966031.1 113_2|113-2GL006265	Converts cobyric acid to cobinamide by the addition of aminopropanol on the F carboxylic group (By similarity)	H
	Core cluster	USDA205|WP_037400593.1 Sm2011|AGG74467.1 7653R|AID30086.2 MAFF303099|WP_010909479.1 USDA_110|WP_038966223.1 113_2|113-2GL005789	Histidine kinase	T
	Core cluster	USDA205|WP_153451536.1 Sm2011|AGG74120.1 7653R|AID30526.2 MAFF303099|WP_044547806.1 USDA_110|WP_011087500.1 113_2|113-2GL004561	Phytoene synthase	I
	Core cluster	USDA205|WP_153451688.1 Sm2011|AGG73482.1 7653R|AID28804.2 MAFF303099|WP_010914888.1 USDA_110|WP_011083989.1 113_2|113-2GL008450	Subunits I and II form the functional Core cluster of the enzyme complex. Electrons originating in cytochrome c are transferred via heme a and Cu(A) to the binuclear center formed by heme a3 and Cu(B) (By similarity)	C
	Core cluster	USDA205|WP_014330035.1 Sm2011|AGG75621.1 7653R|AID33126.2 MAFF303099|WP_032932130.1 USDA_110|WP_011083272.1 113_2|113-2GL000431	Produces ATP from ADP in the presence of a proton gradient across the membrane. The catalytic sites are hosted primarily by the beta subunits (By similarity)	C
	Core cluster	USDA205|WP_037392952.1 Sm2011|AGG74334.1 7653R|AID29708.2 MAFF303099|WP_010909119.1 USDA_110|WP_011088406.1 113_2|113-2GL003563	XdhC CoxI family protein	O
	Core cluster	USDA205|WP_037393560.1 Sm2011|AGG75391.1 7653R|AID32331.1 MAFF303099|WP_044548306.1 USDA_110|WP_011090487.1 113_2|113-2GL001352	Homospermidine synthase	Q
	Core cluster	USDA205|WP_037395311.1 Sm2011|AGG73252.1 7653R|AID32254.2 MAFF303099|WP_010911284.1 USDA_110|WP_011089603.1 113_2|113-2GL002350	Flagellin	N
	Core cluster	USDA205|WP_014329081.1 Sm2011|AGG74917.1 7653R|AID31950.2 MAFF303099|WP_010911001.1 USDA_110|WP_028174694.1 113_2|113-2GL001739	Aspartate aminotransferase	E
	Core cluster	USDA205|WP_037394321.1 Sm2011|AGG75110.1 7653R|AID30505.2 MAFF303099|WP_010909861.1 USDA_110|WP_011086564.1 113_2|113-2GL005737	cytochrome c oxidase, subunit III	C
	Dispensable cluster	USDA205|WP_037392256.1 Sm2011|AGG72380.1 USDA_110|WP_011086695.1 113_2|113-2GL005571 USDA_110|WP_011089801.1 113_2|113-2GL002136	extracellular solute-binding protein, family 1	G
	Core cluster	USDA205|WP_037394219.1 Sm2011|AGG75429.1 7653R|AID32214.1 MAFF303099|WP_010911246.1 USDA_110|WP_011085762.1 113_2|113-2GL006560	Pfam:DUF404	S
	Core cluster	USDA205|WP_014328514.1 Sm2011|AGG74403.1 7653R|AID32083.2 MAFF303099|WP_010911120.1 USDA_110|WP_011085273.1 113_2|113-2GL007133	Component of the ubiquinol-cytochrome c reductase complex (complex III or cytochrome b-c1 complex), which is a respiratory chain that generates an electrochemical potential coupled to ATP synthesis (By similarity)	C
	Core cluster	USDA205|WP_037401731.1 Sm2011|AGG73972.1 7653R|AID30361.2 MAFF303099|WP_032930446.1 USDA_110|WP_011086743.1 113_2|113-2GL005522	UPF0178 protein	S
	Core cluster	USDA205|WP_037393984.1 Sm2011|AGG75848.1 7653R|AID32999.1 MAFF303099|WP_010912010.1 USDA_110|WP_011086742.1 113_2|113-2GL005523	ABC transporter	S
	Core cluster	USDA205|WP_014327767.1 Sm2011|AGG73643.1 7653R|AID29025.1 MAFF303099|WP_010915097.1 USDA_110|WP_008133017.1 113_2|113-2GL004206	Promotes R- polymerase assembly. Latches the N- and C- terminal regions of the beta' subunit thereby facilitating its interaction with the beta and alpha subunits (By similarity)	K
	Core cluster	USDA205|WP_014330813.1 Sm2011|AGG72937.1 7653R|AID34167.1 MAFF303099|WP_010913153.1 USDA_110|WP_028170843.1 113_2|113-2GL005757	Glutamine amidotransferase	S
	Core cluster	USDA205|WP_014330021.1 Sm2011|AGG75608.1 7653R|AID30213.2 MAFF303099|WP_010909596.1 USDA_110|WP_038967390.1 113_2|113-2GL007185	extracellular solute-binding protein	G
	Core cluster	USDA205|WP_014327609.1 Sm2011|AGG73498.1 7653R|AID28824.1 MAFF303099|WP_010914907.1 USDA_110|WP_011084001.1 113_2|113-2GL008438	peptidase	O
	Core cluster	USDA205|WP_080577800.1 Sm2011|AGG73907.1 7653R|AID29812.1 MAFF303099|WP_010909215.1 USDA_110|WP_011087078.1 113_2|113-2GL005144	Ribonuclease	J
	Core cluster	USDA205|WP_153451423.1 Sm2011|AGG74358.1 7653R|QGU20842.1 MAFF303099|WP_013895864.1 USDA_110|WP_011088473.1 113_2|113-2GL003491	Phosphoribosylformylglycinamidine synthase, PurS	F
	Core cluster	USDA205|WP_037398238.1 Sm2011|AGG72754.1 7653R|QGU20653.1 MAFF303099|WP_044548331.1 USDA_110|WP_011090853.1 113_2|113-2GL001045	D- polymerase I	L
	Core cluster	USDA205|WP_014330425.1 Sm2011|AGG72638.1 7653R|AID33868.2 USDA_110|WP_011083475.1 MAFF303099|WP_010912873.1 113_2|113-2GL000190	N-acetyltransferase GCN5	J
	Core cluster	USDA205|WP_014329569.1 Sm2011|AGG75272.1 7653R|AID32753.1 MAFF303099|WP_032931885.1 USDA_110|WP_011083021.1 113_2|113-2GL000699	-	-
	Core cluster	USDA205|WP_037435801.1 Sm2011|AGG73506.1 7653R|AID28830.1 MAFF303099|WP_010914913.1 USDA_110|WP_164930923.1 113_2|113-2GL007119	a g-specific adenine glycosylase	L
	Core cluster	USDA205|WP_037433148.1 Sm2011|AGG72426.1 7653R|AID31943.1 MAFF303099|WP_010910989.1 USDA_110|WP_011090532.1 113_2|113-2GL001302	methylated-D--protein-cysteine methyltransferase	L
	Core cluster	USDA205|WP_060563652.1 Sm2011|AGG72453.1 7653R|AID33124.1 MAFF303099|WP_010912150.1 USDA_110|WP_038965670.1 113_2|113-2GL002380	Mannitol dehydrogenase	G
	Core cluster	USDA205|WP_014329197.1 Sm2011|AGG72173.1 7653R|AID33977.1 MAFF303099|WP_010912973.1 USDA_110|WP_038966721.1 113_2|113-2GL003025	5-hydroxyisourate hydrolase	F
	Dispensable cluster	USDA205|WP_014329632.1 7653R|AID30568.2 MAFF303099|WP_010912643.1 USDA_110|WP_063921628.1 113_2|113-2GL005601 113_2|113-2GL008351	resolvase	L
	Core cluster	USDA205|WP_037400926.1 Sm2011|AGG74694.1 7653R|AID30873.1 MAFF303099|WP_044547969.1 USDA_110|WP_028174057.1 113_2|113-2GL004857	Nitrile hydratase beta subunit	S
	Core cluster	USDA205|WP_080577477.1 Sm2011|AGG73295.1 7653R|AID28047.1 MAFF303099|WP_010914120.1 USDA_110|WP_011089842.1 113_2|113-2GL002095	Part of the ABC transporter complex PotABCD involved in spermidine putrescine import. Responsible for energy coupling to the transport system (By similarity)	E
	Core cluster	USDA205|WP_014330518.1 Sm2011|AGG72733.1 7653R|AID34275.1 MAFF303099|WP_010913270.1 USDA_110|WP_011089907.1 113_2|113-2GL002018	2-hydroxyacid dehydrogenase	C
	Core cluster	USDA205|WP_037391113.1 Sm2011|AGG73758.1 7653R|AID29140.1 MAFF303099|WP_010915198.1 USDA_110|WP_011090201.1 113_2|113-2GL001680	protein involved in catabolism of external D-	S
	Core cluster	USDA205|WP_014327835.1 Sm2011|AGG73729.1 7653R|AID29118.2 MAFF303099|WP_010915179.1 USDA_110|WP_011086877.1 113_2|113-2GL005375	Catalyzes the -D(P)-dependent oxidation of 4- (phosphohydroxy)-L-threonine (HTP) into 2-amino-3-oxo-4- (phosphohydroxy)butyric acid which spontaneously decarboxylates to form 3-amino-2-oxopropyl phosphate (AHAP) (By similarity)	H
	Core cluster	USDA205|WP_014327073.1 Sm2011|AGG72986.1 7653R|AID34313.1 MAFF303099|WP_032917757.1 USDA_110|WP_038965163.1 113_2|113-2GL000039	PhoH family	T
	Core cluster	USDA205|WP_080582738.1 Sm2011|AGG75212.1 7653R|AID32657.2 MAFF303099|WP_032931819.1 USDA_110|WP_038966655.1 113_2|113-2GL000681	Methyltransferase	Q
	Core cluster	USDA205|WP_014330119.1 Sm2011|AGG75670.1 7653R|AID33244.1 MAFF303099|WP_032932212.1 USDA_110|WP_011083384.1 113_2|113-2GL000306	Tellurite resistance protein TerB	S
	Core cluster	USDA205|WP_014327114.1 Sm2011|AGG73025.1 7653R|AID33683.2 MAFF303099|WP_044548651.1 USDA_110|WP_011090819.1 113_2|113-2GL001079	RNaseP catalyzes the removal of the 5'-leader sequence from pre-tR- to produce the mature 5'-terminus. It can also cleave other R- substrates such as 4.5S R-. The protein component plays an auxiliary but essential role in vivo by binding to the 5'-leader sequence and broadening the substrate specificity of the ribozyme (By similarity)	J
	Core cluster	USDA205|WP_014329530.1 Sm2011|AGG75227.1 7653R|AID32676.1 MAFF303099|WP_010911702.1 USDA_110|WP_028173554.1 113_2|113-2GL008224	HNH endonuclease	V
	Core cluster	USDA205|WP_080577480.1 Sm2011|AGG73257.1 7653R|AID32261.2 MAFF303099|WP_044548299.1 USDA_110|WP_011089597.1 113_2|113-2GL002356	Lytic transglycosylase catalytic	M
	Core cluster	USDA205|WP_037395778.1 Sm2011|AGG71049.1 7653R|AID29448.1 MAFF303099|WP_010915524.1 USDA_110|WP_011088985.1 113_2|113-2GL002935	Transcriptional regulator, gntR family	K
	Core cluster	USDA205|WP_014857653.1 Sm2011|AGG70131.1 7653R|AID34805.1 MAFF303099|WP_010913570.1 USDA_110|WP_011084582.1 113_2|113-2GL007878	Electron transfer flavoprotein	C
	Core cluster	USDA205|WP_014327993.1 Sm2011|AGG73853.1 7653R|AID30778.1 MAFF303099|WP_010910104.1 USDA_110|WP_063921473.1 113_2|113-2GL004365	NDH-1 shuttles electrons from -DH, via FMN and iron- sulfur (Fe-S) centers, to quinones in the respiratory chain. The immediate electron acceptor for the enzyme in this species is believed to be ubiquinone. Couples the redox reaction to proton translocation (for every two electrons transferred, four hydrogen ions are translocated across the cytoplasmic membrane), and thus conserves the redox ener…	C
	Core cluster	USDA205|WP_095689662.1 Sm2011|AGG72948.1 7653R|QGU20597.1 MAFF303099|WP_010913341.1 USDA_110|WP_011083652.1 113_2|113-2GL000001	it binds specifically double-stranded D- at a 9 bp consensus (dnaA box) 5'-TTATC CA A CA A-3'. DnaA binds to ATP and to acidic phospholipids (By similarity)	L
	Core cluster	USDA205|WP_037432414.1 Sm2011|AGG71040.1 7653R|AID30601.2 MAFF303099|WP_010909935.1 USDA_110|WP_051000229.1 113_2|113-2GL000468	Transcriptional regulator	K
	Core cluster	USDA205|WP_012708153.1 Sm2011|AGG74357.1 7653R|AID29692.1 MAFF303099|WP_010909103.1 USDA_110|WP_006614500.1 113_2|113-2GL003490	SAICAR synthetase	F
	Core cluster	USDA205|WP_037393785.1 Sm2011|AGG75774.1 7653R|AID33399.1 MAFF303099|WP_010912422.1 USDA_110|WP_011083330.1 113_2|113-2GL000367	Citrate lyase	C
	Core cluster	USDA205|WP_014328282.1 Sm2011|AGG74302.1 7653R|AID29774.2 MAFF303099|WP_032920553.1 USDA_110|WP_038967130.1 113_2|113-2GL004954	D--binding domain protein	K
	Core cluster	USDA205|WP_037428868.1 Sm2011|AGG71440.1 7653R|AID29134.2 MAFF303099|WP_010915193.1 USDA_110|WP_011088745.1 113_2|113-2GL003200	nad-dependent epimerase dehydratase	M
	Core cluster	USDA205|WP_037391229.1 Sm2011|AGG73638.1 7653R|AID29017.1 MAFF303099|WP_010915090.1 USDA_110|WP_038966353.1 113_2|113-2GL004198	transglycosylase	M
	Core cluster	USDA205|WP_037391112.1 Sm2011|AGG73759.1 7653R|AID29177.1 MAFF303099|WP_010915228.1 USDA_110|WP_011088785.1 113_2|113-2GL003157	Molybdopterin oxidoreductase	C
	Core cluster	USDA205|WP_153451980.1 Sm2011|AGG74726.1 7653R|AID30929.1 MAFF303099|WP_010910200.1 USDA_110|WP_011089276.1 113_2|113-2GL002705	asmA family	S
	Core cluster	USDA205|WP_037394490.1 Sm2011|AGG75034.1 7653R|AID33773.1 MAFF303099|WP_010912808.1 USDA_110|WP_011086008.1 113_2|113-2GL006298	ABC transporter	E
	Core cluster	USDA205|WP_014331918.1 Sm2011|AGG70953.1 7653R|AID32419.1 MAFF303099|WP_010911434.1 USDA_110|WP_011089514.1 113_2|113-2GL002447	Two component transcriptional regulator, winged helix family	T
	Core cluster	USDA205|WP_037391003.1 Sm2011|AGG73826.1 7653R|AID29592.1 MAFF303099|WP_010915639.1 USDA_110|WP_011087727.1 113_2|113-2GL004307	thioesterase	Q
	Core cluster	USDA205|WP_060563345.1 Sm2011|AGG74387.1 7653R|AID30274.1 MAFF303099|WP_032930382.1 USDA_110|WP_011088552.1 113_2|113-2GL003397	Histidine kinase	T
	Core cluster	USDA205|WP_037400920.1 Sm2011|AGG74696.1 7653R|AID30875.1 MAFF303099|WP_010910156.1 USDA_110|WP_028174055.1 113_2|113-2GL004855	nitrile hydratase alpha subunit	Q
	Core cluster	USDA205|WP_014857528.1 Sm2011|AGG70135.1 7653R|AID34765.1 MAFF303099|WP_010913609.1 USDA_110|WP_011084552.1 113_2|113-2GL007905	Nitrogenase protein alpha chain	C
	Core cluster	USDA205|WP_014327422.1 Sm2011|AGG69819.1 7653R|AID28707.1 MAFF303099|WP_010914796.1 USDA_110|WP_011085983.1 113_2|113-2GL006322	fumarylacetoacetate (faa) hydrolase	S
	Core cluster	USDA205|WP_037392936.1 Sm2011|AGG74341.1 7653R|AID33625.1 MAFF303099|WP_010912685.1 USDA_110|WP_011088426.1 113_2|113-2GL003542	ribulose-phosphate 3-epimerase	G
	Core cluster	USDA205|WP_037396051.1 Sm2011|AGG72139.1 7653R|AID31554.1 MAFF303099|WP_010910780.1 USDA_110|WP_011089490.1 113_2|113-2GL002473	activator of Hsp90 ATPase 1 family protein	S
	Core cluster	USDA205|WP_037392017.1 Sm2011|AGG73226.1 7653R|AID32256.1 MAFF303099|WP_010911285.1 USDA_110|WP_063921537.1 113_2|113-2GL002351	The M ring may be actively involved in energy transduction (By similarity)	N
	Core cluster	USDA205|WP_014329533.1 Sm2011|AGG75230.1 7653R|AID32680.1 MAFF303099|WP_027047430.1 USDA_110|WP_011084192.1 113_2|113-2GL008218	Ribonuclease, BN	S
	Core cluster	USDA205|WP_003537642.1 Sm2011|AGG73873.1 7653R|AID30346.2 MAFF303099|WP_010909712.1 USDA_110|WP_007603272.1 113_2|113-2GL004147	response regulator	T
	Core cluster	USDA205|WP_153451807.1 Sm2011|AGG72966.1 7653R|AID32502.1 MAFF303099|WP_006200394.1 USDA_110|WP_008539997.1 113_2|113-2GL000091	This protein is one of the two subunits of integration host factor, a specific D--binding protein that functions in genetic recombination as well as in transcriptional and translational control (By similarity)	K
	Core cluster	USDA205|WP_014327672.1 Sm2011|AGG73546.1 7653R|AID31025.1 MAFF303099|WP_010910294.1 USDA_110|WP_011085533.1 113_2|113-2GL006796	Catalyzes the S-adenosylmethionine monomethyl esterification of trans-aconitate (By similarity)	S
	Dispensable cluster	USDA205|WP_060563195.1 Sm2011|AGG73174.1 7653R|AID32438.2 MAFF303099|WP_010912131.1 113_2|113-2GL000288 MAFF303099|WP_010915909.1	resolvase	L
	Core cluster	USDA205|WP_080577423.1 Sm2011|AGG75056.1 7653R|AID33785.2 MAFF303099|WP_010912819.1 USDA_110|WP_011084275.1 113_2|113-2GL008121	Required for maturation of urease via the functional incorporation of the urease nickel metallocenter (By similarity)	O
	Core cluster	USDA205|WP_037398714.1 Sm2011|AGG72802.1 7653R|AID34281.1 MAFF303099|WP_010913276.1 USDA_110|WP_011084240.1 113_2|113-2GL008161	cytochrome c	C
	Core cluster	USDA205|WP_014328190.1 Sm2011|AGG74071.1 7653R|AID30167.1 MAFF303099|WP_010909561.1 USDA_110|WP_011087891.1 113_2|113-2GL004138	glycerophosphoryl diester phosphodiesterase	C
	Core cluster	USDA205|WP_014327067.1 Sm2011|AGG72981.1 7653R|AID34142.1 MAFF303099|WP_010913127.1 USDA_110|WP_011083622.1 113_2|113-2GL000033	Scaffold protein Nfu NifU	O
	Core cluster	USDA205|WP_037436629.1 Sm2011|AGG75620.1 7653R|AID33125.2 MAFF303099|WP_010912151.1 USDA_110|WP_011083271.1 113_2|113-2GL000432	Produces ATP from ADP in the presence of a proton gradient across the membrane (By similarity)	C
	Core cluster	USDA205|WP_014327344.1 Sm2011|AGG73248.1 7653R|AID32251.1 MAFF303099|WP_010911282.1 USDA_110|WP_011089605.1 113_2|113-2GL002348	Flagellar biosynthetic protein fliP	N
	Core cluster	USDA205|WP_012707462.1 Sm2011|AGG73717.1 7653R|AID29106.1 MAFF303099|WP_010915168.1 USDA_110|WP_011086854.1 113_2|113-2GL005401	Binds together with S18 to 16S ribosomal R- (By similarity)	J
	Core cluster	USDA205|WP_037393938.1 Sm2011|AGG75817.1 7653R|AID33343.1 MAFF303099|WP_010912368.1 USDA_110|WP_011083289.1 113_2|113-2GL000411	2'-5' R- ligase	J
	Core cluster	USDA205|WP_060564140.1 Sm2011|AGG73931.1 7653R|AID29893.1 MAFF303099|WP_006202127.1 USDA_110|WP_011088154.1 113_2|113-2GL003848	One of the primary rR- binding proteins, it binds directly to 16S rR- where it nucleates assembly of the head domain of the 30S subunit. Is located at the subunit interface close to the decoding center, probably blocks exit of the E-site tR- (By similarity)	J
	Core cluster	USDA205|WP_037398160.1 Sm2011|AGG72616.1 7653R|AID33933.1 MAFF303099|WP_010912933.1 USDA_110|WP_011083576.1 113_2|113-2GL000080	double-strand break repair protein Addb	L
	Core cluster	USDA205|WP_060563215.1 Sm2011|AGG72505.1 7653R|AID28555.1 MAFF303099|WP_010914671.1 USDA_110|WP_011090562.1 113_2|113-2GL001269	4-hydroxybenzoate 3-monooxygenase	Q
	Core cluster	USDA205|WP_014328581.1 Sm2011|AGG74474.1 7653R|AID33475.1 MAFF303099|WP_010912500.1 USDA_110|WP_011089318.1 113_2|113-2GL002656	ABC transporter	V
	Core cluster	USDA205|WP_037391249.1 Sm2011|AGG73621.1 7653R|AID28994.1 MAFF303099|WP_010915066.1 USDA_110|WP_038966123.1 113_2|113-2GL001191	Amp nucleosidase	F
	Core cluster	USDA205|WP_037398290.1 Sm2011|AGG72746.1 7653R|AID32481.1 MAFF303099|WP_010911473.1 USDA_110|WP_011083514.1 113_2|113-2GL000150	Integral membrane protein (DUF2244)	S
	Core cluster	USDA205|WP_037393487.1 Sm2011|AGG74034.1 7653R|QGU20822.1 MAFF303099|WP_010909340.1 USDA_110|WP_011087256.1 113_2|113-2GL004870	cina domain protein	S
	Core cluster	USDA205|WP_153451719.1 Sm2011|AGG73336.1 7653R|AID29480.2 MAFF303099|WP_044551699.1 USDA_110|WP_011086746.1 113_2|113-2GL005519	ppx gppa phosphatase	T
	Core cluster	USDA205|WP_014328525.1 Sm2011|AGG74415.1 7653R|AID30298.2 MAFF303099|WP_044547695.1 USDA_110|WP_011088804.1 113_2|113-2GL003137	ABC transporter (Protein	Q
	Core cluster	USDA205|WP_014329507.1 Sm2011|AGG75203.1 7653R|AID32640.2 MAFF303099|WP_010911669.1 USDA_110|WP_011083050.1 113_2|113-2GL000670	Peptide chain release factor 1 directs the termination of translation in response to the peptide chain termination codons UAG and UAA (By similarity)	J
	Core cluster	USDA205|WP_014330401.1 Sm2011|AGG72612.1 7653R|AID33926.1 MAFF303099|WP_044548743.1 USDA_110|WP_011083572.1 113_2|113-2GL000085	folC bifunctional protein	H
	Core cluster	USDA205|WP_037391939.1 Sm2011|AGG73129.1 7653R|AID27919.1 MAFF303099|WP_010913421.1 USDA_110|WP_011083959.1 113_2|113-2GL008482	Catalyzes the conversion of dihydroorotate to orotate with quinone as electron acceptor (By similarity)	F
	Core cluster	USDA205|WP_037395782.1 Sm2011|AGG71050.1 7653R|AID31955.1 MAFF303099|WP_010911006.1 USDA_110|WP_011090149.1 113_2|113-2GL001741	elongation factor G	T
	Core cluster	USDA205|WP_060563949.1 Sm2011|AGG69752.1 7653R|AID32517.2 MAFF303099|WP_010911509.1 USDA_110|WP_063921406.1 113_2|113-2GL007435	Fatty acid desaturase	I
	Core cluster	USDA205|WP_037393693.1 Sm2011|AGG75325.1 7653R|AID33011.1 MAFF303099|WP_010912019.1 USDA_110|WP_028174702.1 113_2|113-2GL001750	Catalyzes the conversion of glucosamine-6-phosphate to glucosamine-1-phosphate (By similarity)	G
	Core cluster	USDA205|WP_014329213.1 Sm2011|AGG72192.1 7653R|AID34070.1 MAFF303099|WP_010913057.1 USDA_110|WP_011088614.1 113_2|113-2GL003333	Aldehyde dehydrogenase	C
	Core cluster	USDA205|WP_037396581.1 Sm2011|AGG74407.1 7653R|AID32093.1 MAFF303099|WP_010911129.1 USDA_110|WP_011085271.1 113_2|113-2GL007135	Methylates the ribose at the nucleotide 34 wobble position in the two leucyl isoacceptors tR-(Leu)(CmAA) and tR-(Leu)(cmnm5UmAA). Catalyzes the methyl transfer from S- adenosyl-L-methionine to the 2'-OH of the wobble nucleotide (By similarity)	J
	Core cluster	USDA205|WP_037398122.1 Sm2011|AGG72647.1 7653R|AID34135.1 MAFF303099|WP_010913120.1 USDA_110|WP_011083727.1 113_2|113-2GL008740	Histidine kinase	T
	Core cluster	USDA205|WP_014327227.1 Sm2011|AGG73125.1 7653R|AID34272.1 MAFF303099|WP_044548848.1 USDA_110|WP_011083965.1 113_2|113-2GL008475	Methyltransferase	S
	Core cluster	USDA205|WP_037397382.1 Sm2011|AGG72905.1 7653R|AID33567.1 MAFF303099|WP_010912588.1 USDA_110|WP_011089578.1 113_2|113-2GL002377	nad-dependent epimerase dehydratase	M
	Core cluster	USDA205|WP_037437259.1 Sm2011|AGG75870.1 7653R|AID32940.1 MAFF303099|WP_010911952.1 USDA_110|WP_011083758.1 113_2|113-2GL008706	Converts 2C-methyl-D-erythritol 2,4-cyclodiphosphate (ME-2,4cPP) into 1-hydroxy-2-methyl-2-(E)-butenyl 4-diphosphate (By similarity)	I
	Core cluster	USDA205|WP_014330664.1 Sm2011|AGG72820.1 7653R|AID34326.2 MAFF303099|WP_010913323.1 USDA_110|WP_011083604.1 113_2|113-2GL000051	Associates with free 30S ribosomal subunits (but not with 30S subunits that are part of 70S ribosomes or polysomes). Essential for efficient processing of 16S rR-. May interact with the 5'-terminal helix region of 16S rR- (By similarity)	J
	Core cluster	USDA205|WP_037393812.1 Sm2011|AGG75770.1 7653R|AID33403.2 MAFF303099|WP_044548497.1 USDA_110|WP_063921433.1 113_2|113-2GL006509	nucleotidyltransferase D- polymerase involved in D-	L
	Core cluster	USDA205|WP_014327976.1 Sm2011|AGG73836.1 7653R|AID29605.1 MAFF303099|WP_010915651.1 USDA_110|WP_008547851.1 113_2|113-2GL004329	ATP-dependent specificity component of the Clp protease. It directs the protease to specific substrates. Can perform chaperone functions in the absence of ClpP (By similarity)	O
	Core cluster	USDA205|WP_014327889.1 Sm2011|AGG73783.1 7653R|AID29499.1 MAFF303099|WP_010915563.1 USDA_110|WP_011087800.1 113_2|113-2GL004237	May conjugate Arg from its aminoacyl-tR- to the N- termini of proteins containing an N-terminal aspartate or glutamate	O
	Core cluster	USDA205|WP_014327908.1 Sm2011|AGG73803.1 7653R|AID29548.1 MAFF303099|WP_010915607.1 USDA_110|WP_011087782.1 113_2|113-2GL004263	Catalyzes the reversible formation of acyl-phosphate (acyl-PO(4)) from acyl- acyl-carrier-protein (acyl-ACP). This enzyme utilizes acyl-ACP as fatty acyl donor, but not acyl-CoA (By similarity)	I
	Core cluster	USDA205|WP_014327046.1 Sm2011|AGG72960.1 7653R|AID32496.1 MAFF303099|WP_010911487.1 USDA_110|WP_011083549.1 113_2|113-2GL000112	sigma 54 modulation protein ribosomal protein S30EA	J
	Core cluster	USDA205|WP_014330364.1 Sm2011|AGG75934.1 7653R|AID33441.2 MAFF303099|WP_010912469.1 USDA_110|WP_011083458.1 113_2|113-2GL000209	Chromosome Partitioning Protein	D
	Core cluster	USDA205|WP_012709824.1 Sm2011|AGG75938.1 7653R|AID33446.2 MAFF303099|WP_010912474.1 USDA_110|WP_011083462.1 113_2|113-2GL000204	Facilitates transcription termination by a mechanism that involves Rho binding to the nascent R-, activation of Rho's R--dependent ATPase activity, and release of the mR- from the D- template (By similarity)	K
	Core cluster	USDA205|WP_037400739.1 Sm2011|AGG75866.1 7653R|AID32933.1 MAFF303099|WP_010911945.1 USDA_110|WP_011083768.1 113_2|113-2GL008695	Polyprenyl synthetase	H
	Core cluster	USDA205|WP_014328542.1 Sm2011|AGG74438.1 7653R|AID30322.2 MAFF303099|WP_010909688.1 USDA_110|WP_011086559.1 113_2|113-2GL005742	phospho-2-dehydro-3-deoxyheptonate aldolase	E
	Core cluster	USDA205|WP_037395414.1 Sm2011|AGG74543.1 7653R|AID30736.1 MAFF303099|WP_010910065.1 USDA_110|WP_011086044.1 113_2|113-2GL006262	cob(I)yrinic acid a,c-diamide adenosyltransferase	H
	Core cluster	USDA205|WP_014328075.1 Sm2011|AGG73956.1 7653R|AID29918.2 MAFF303099|WP_010909288.1 USDA_110|WP_011088134.1 113_2|113-2GL003873	Catalyzes the reversible transfer of the terminal phosphate group between ATP and AMP. Plays an important role in cellular energy homeostasis and in adenine nucleotide metabolism (By similarity)	F
	Core cluster	USDA205|WP_037396478.1 Sm2011|AGG74186.1 7653R|AID30016.2 MAFF303099|WP_010909365.1 USDA_110|WP_011087289.1 113_2|113-2GL004833	Phosphorylation of dTMP to form dTDP in both de novo and salvage pathways of dTTP synthesis (By similarity)	F
	Core cluster	USDA205|WP_037393776.1 Sm2011|AGG75786.1 7653R|AID33270.1 MAFF303099|WP_010912292.1 USDA_110|WP_028174978.1 113_2|113-2GL000236	Acyl-coa thioesterase	I
	Core cluster	USDA205|WP_037393013.1 Sm2011|AGG74127.1 7653R|AID30369.1 MAFF303099|WP_044550512.1 USDA_110|WP_011088496.1 113_2|113-2GL003465	The glycine cleavage system catalyzes the degradation of glycine. The H protein shuttles the methylamine group of glycine from the P protein to the T protein (By similarity)	E
	Core cluster	USDA205|WP_014327987.1 Sm2011|AGG73847.1 7653R|AID30783.1 MAFF303099|WP_010910109.1 USDA_110|WP_011087682.1 113_2|113-2GL004359	NDH-1 shuttles electrons from -DH, via FMN and iron- sulfur (Fe-S) centers, to quinones in the respiratory chain. The immediate electron acceptor for the enzyme in this species is believed to be ubiquinone. Couples the redox reaction to proton translocation (for every two electrons transferred, four hydrogen ions are translocated across the cytoplasmic membrane), and thus conserves the redox ener…	C
	Core cluster	USDA205|WP_037394108.1 Sm2011|AGG75509.1 7653R|AID30795.2 MAFF303099|WP_010910121.1 USDA_110|WP_011086052.1 113_2|113-2GL006254	precorrin-6x reductase	H
	Core cluster	USDA205|WP_014327232.1 Sm2011|AGG73131.1 7653R|AID27921.1 MAFF303099|WP_032934027.1 USDA_110|WP_028173697.1 113_2|113-2GL008430	-	-
	Core cluster	USDA205|WP_037396644.1 Sm2011|AGG74443.1 7653R|AID30061.1 MAFF303099|WP_010909455.1 USDA_110|WP_011089867.1 113_2|113-2GL002067	Peptidoglycan binding domain-containing protein	S
	Core cluster	USDA205|WP_014327779.1 Sm2011|AGG73661.1 7653R|AID34103.1 MAFF303099|WP_010913083.1 USDA_110|WP_011090851.1 113_2|113-2GL001047	Udp-glucose 6-dehydrogenase	M
	Dispensable cluster	USDA205|WP_014857659.1 7653R|AID34814.1 MAFF303099|WP_010913565.1 USDA_110|WP_028153326.1 113_2|113-2GL007887 7653R|QGU21014.1	NifZ family	S
	Core cluster	USDA205|WP_050984097.1 Sm2011|AGG72637.1 7653R|AID33869.2 MAFF303099|WP_019862614.1 USDA_110|WP_011083476.1 113_2|113-2GL000189	Protease subunit of a proteasome-like degradation complex believed to be a general protein degrading machinery (By similarity)	O
	Core cluster	USDA205|WP_015633449.1 Sm2011|AGG70127.1 7653R|AID34812.2 MAFF303099|WP_010913567.1 USDA_110|WP_041960893.1 113_2|113-2GL007888	cofactor biosynthesis protein NifB	S
	Core cluster	USDA205|WP_014327230.1 Sm2011|AGG73128.1 7653R|AID27918.1 MAFF303099|WP_044551183.1 USDA_110|WP_011083960.1 113_2|113-2GL008481	Mate efflux family protein	V
	Core cluster	USDA205|WP_060563538.1 Sm2011|AGG75626.1 7653R|AID33132.1 MAFF303099|WP_010912159.1 USDA_110|WP_011083277.1 113_2|113-2GL000425	Primosomal protein n'	L
	Core cluster	USDA205|WP_050999872.1 Sm2011|AGG73065.1 7653R|AID34227.2 MAFF303099|WP_044548837.1 USDA_110|WP_011084137.1 113_2|113-2GL008281	AMP-dependent synthetase and ligase	I
	Core cluster	USDA205|WP_037435568.1 Sm2011|AGG72119.1 7653R|AID32198.1 MAFF303099|WP_044548290.1 USDA_110|WP_011085593.1 113_2|113-2GL006733	Nitrate reductase, large subunit	C
	Core cluster	USDA205|WP_014328719.1 Sm2011|AGG74556.1 7653R|AID29081.1 MAFF303099|WP_010915150.1 USDA_110|WP_011088015.1 113_2|113-2GL003995	4-oxalocrotonate tautomerase	S
	Core cluster	USDA205|WP_014327829.1 Sm2011|AGG73721.1 7653R|AID29110.2 MAFF303099|WP_010915172.1 USDA_110|WP_011086858.1 113_2|113-2GL005396	reductase	I
	Core cluster	USDA205|WP_153451291.1 Sm2011|AGG75247.1 7653R|AID32713.1 MAFF303099|WP_010911739.1 USDA_110|WP_027544305.1 113_2|113-2GL008200	cell division ATP-binding protein	D
	Core cluster	USDA205|WP_037399624.1 Sm2011|AGG72972.1 7653R|AID32512.2 MAFF303099|WP_010911503.1 USDA_110|WP_038965129.1 113_2|113-2GL000179	Histidine kinase	T
	Core cluster	USDA205|WP_037394639.1 Sm2011|AGG75266.1 7653R|AID32747.1 MAFF303099|WP_010911777.1 USDA_110|WP_011083017.1 113_2|113-2GL000703	bolA family	K
	Core cluster	USDA205|WP_037428536.1 Sm2011|AGG72399.1 7653R|AID29869.1 MAFF303099|WP_010909248.1 USDA_110|WP_011085951.1 113_2|113-2GL006355	Catalyzes the reversible isomerization between hydroxypyruvate and 2-hydroxy-3-oxopropanoate (also termed tartronate semialdehyde) (By similarity)	G
	Core cluster	USDA205|WP_014330521.1 Sm2011|AGG72736.1 7653R|AID34278.2 MAFF303099|WP_010913273.1 USDA_110|WP_011084243.1 113_2|113-2GL008158	ABC transporter permease protein	P
	Core cluster	USDA205|WP_014327119.1 Sm2011|AGG73041.1 7653R|AID30508.2 MAFF303099|WP_010909864.1 USDA_110|WP_028172875.1 113_2|113-2GL001837	YbaK prolyl-tR- synthetase associated region	S
	Core cluster	USDA205|WP_014327206.1 Sm2011|AGG73102.1 7653R|AID27897.1 MAFF303099|WP_010913398.1 USDA_110|WP_038965254.1 113_2|113-2GL008521	O-succinylhomoserine sulfhydrylase	E
	Core cluster	USDA205|WP_014329838.1 Sm2011|AGG75464.1 7653R|AID32300.2 MAFF303099|WP_010911321.1 USDA_110|WP_011090484.1 113_2|113-2GL001355	decarboxylase	E
	Core cluster	USDA205|WP_014327328.1 Sm2011|AGG73231.1 7653R|QGU20666.1 MAFF303099|WP_010911265.1 USDA_110|WP_011089616.1 113_2|113-2GL002337	FliG is one of three proteins (FliG, FliN, FliM) that forms the rotor-mounted switch complex (C ring), located at the base of the basal body. This complex interacts with the CheY and CheZ chemotaxis proteins, in addition to contacting components of the motor that determine the direction of flagellar rotation (By similarity)	N
	Core cluster	USDA205|WP_014330821.1 Sm2011|AGG72945.1 7653R|AID27840.1 MAFF303099|WP_010913344.1 USDA_110|WP_011083585.1 113_2|113-2GL000071	Involved in base excision repair of D- damaged by oxidation or by mutagenic agents. Acts as D- glycosylase that recognizes and removes damaged bases. Has a preference for oxidized purines, such as 7,8-dihydro-8-oxoguanine (8-oxoG). Has AP (apurinic apyrimidinic) lyase activity and introduces nicks in the D- strand. Cleaves the D- backbone by beta-delta elimination to generate a single-strand brea…	L
	Core cluster	USDA205|WP_003536531.1 Sm2011|AGG73942.1 7653R|AID29904.1 MAFF303099|WP_010909279.1 USDA_110|WP_008549252.1 113_2|113-2GL003859	Binds 23S rR- and is also seen to make contacts with the A and possibly P site tR-s (By similarity)	J
	Core cluster	USDA205|WP_014329522.1 Sm2011|AGG75217.1 7653R|AID32662.1 MAFF303099|WP_010911690.1 USDA_110|WP_011083038.1 113_2|113-2GL000683	Catalyzes two activities which are involved in the cyclic version of arginine biosynthesis the synthesis of N- acetylglutamate from glutamate and acetyl-CoA as the acetyl donor, and of ornithine by transacetylation between N(2)-acetylornithine and glutamate (By similarity)	E
	Core cluster	USDA205|WP_037391174.1 Sm2011|AGG73690.1 7653R|AID29057.1 MAFF303099|WP_010915129.1 USDA_110|WP_011086571.1 113_2|113-2GL005730	Cysteinyl-tR- synthetase	J
	Core cluster	USDA205|WP_014327989.1 Sm2011|AGG73849.1 7653R|AID30782.1 MAFF303099|WP_010910108.1 USDA_110|WP_011087680.1 113_2|113-2GL004361	subunit e	C
	Core cluster	USDA205|WP_037392574.1 Sm2011|AGG73503.1 7653R|AID33538.1 MAFF303099|WP_010912563.1 USDA_110|WP_028171413.1 113_2|113-2GL003910	Transcriptional Regulator, ArsR family	K
	Core cluster	USDA205|WP_037400625.1 Sm2011|AGG74460.1 7653R|AID31562.1 MAFF303099|WP_044548213.1 USDA_110|WP_161537191.1 113_2|113-2GL001264	Predicted integral membrane protein (DUF2270)	S
	Core cluster	USDA205|WP_014328214.1 Sm2011|AGG74097.1 7653R|AID30551.2 MAFF303099|WP_010909903.1 USDA_110|WP_038967247.1 113_2|113-2GL004531	Exopolysaccharide production negative regulator	S
	Core cluster	USDA205|WP_014328241.1 Sm2011|AGG74122.1 7653R|AID30521.1 MAFF303099|WP_010909876.1 USDA_110|WP_011087495.1 113_2|113-2GL004567	Catalyzes the folate-dependent formation of 5-methyl- uridine at position 54 (M-5-U54) in all tR-s (By similarity)	J
	Core cluster	USDA205|WP_037394617.1 Sm2011|AGG75281.1 7653R|AID32760.1 MAFF303099|WP_010911791.1 USDA_110|WP_011085805.1 113_2|113-2GL006513	amidohydrolase	E
	Core cluster	USDA205|WP_060563301.1 Sm2011|AGG75451.1 7653R|AID34019.1 MAFF303099|WP_010913014.1 USDA_110|WP_038965507.1 113_2|113-2GL002072	The transhydrogenation between -DH and -DP is coupled to respiration and ATP hydrolysis and functions as a proton pump across the membrane (By similarity)	C
	Core cluster	USDA205|WP_037391078.1 Sm2011|AGG73791.1 7653R|AID29535.2 MAFF303099|WP_010915594.1 USDA_110|WP_011087792.1 113_2|113-2GL004252	Converts 2,5-diamino-6-(ribosylamino)-4(3h)-pyrimidinone 5'-phosphate into 5-amino-6-(ribosylamino)-2,4(1h,3h)- pyrimidinedione 5'-phosphate (By similarity)	H
	Core cluster	USDA205|WP_037399630.1 Sm2011|AGG72976.1 7653R|AID34148.1 MAFF303099|WP_010913133.1 USDA_110|WP_038965190.1 113_2|113-2GL008726	Modifies, by uridylylation or deuridylylation the PII (GlnB) regulatory protein (By similarity)	O
	Core cluster	USDA205|WP_037392792.1 Sm2011|AGG74205.1 7653R|AID29953.1 MAFF303099|WP_010909311.1 USDA_110|WP_038966391.1 113_2|113-2GL002537	sulfurtransferase	P
	Core cluster	USDA205|WP_037391315.1 Sm2011|AGG73551.1 7653R|AID31200.1 MAFF303099|WP_010910449.1 USDA_110|WP_038965261.1 113_2|113-2GL008515	glyoxalase bleomycin resistance protein dioxygenase	E
	Core cluster	USDA205|WP_037396545.1 Sm2011|AGG74392.1 7653R|AID30279.2 MAFF303099|WP_010909650.1 USDA_110|WP_011089989.1 113_2|113-2GL001924	UPF0283 membrane protein	S
	Core cluster	USDA205|WP_014330020.1 Sm2011|AGG75607.1 7653R|AID30214.1 MAFF303099|WP_032930358.1 USDA_110|WP_011085228.1 113_2|113-2GL007186	Predicted small integral membrane protein (DUF2160)	S
	Core cluster	USDA205|WP_153451986.1 Sm2011|AGG72832.1 7653R|AID34049.1 MAFF303099|WP_027047671.1 USDA_110|WP_011083562.1 113_2|113-2GL000099	Protein of unknown function (FYDLN_acid)	S
	Core cluster	USDA205|WP_037397448.1 Sm2011|AGG72920.1 7653R|AID33550.1 MAFF303099|WP_010912571.1 USDA_110|WP_011087451.1 113_2|113-2GL004636	Cysteine synthase	E
	Core cluster	USDA205|WP_037396636.1 Sm2011|AGG74439.1 7653R|AID30054.1 MAFF303099|WP_010909448.1 USDA_110|WP_011086538.1 113_2|113-2GL005769	reductase	O
	Core cluster	USDA205|WP_037393802.1 Sm2011|AGG75757.1 7653R|AID33112.1 MAFF303099|WP_010912117.1 USDA_110|WP_011083257.1 113_2|113-2GL000446	An essential GTPase which binds GTP, GDP and possibly (p)ppGpp with moderate affinity, with high nucleotide exchange rates and a fairly low GTP hydrolysis rate. It may play a role in control of the cell cycle, stress response, ribosome biogenesis and in those bacteria that undergo differentiation, in morphogenesis control (By similarity)	S
	Core cluster	USDA205|WP_014328060.1 Sm2011|AGG73928.1 7653R|AID29888.2 MAFF303099|WP_010909267.1 USDA_110|WP_011088158.1 113_2|113-2GL003843	D--dependent R- polymerase catalyzes the transcription of D- into R- using the four ribonucleoside triphosphates as substrates (By similarity)	K
	Core cluster	USDA205|WP_080577799.1 Sm2011|AGG73904.1 7653R|AID29810.1 MAFF303099|WP_010909213.1 USDA_110|WP_011087069.1 113_2|113-2GL005153	Aminotransferase	E
	Core cluster	USDA205|WP_014330420.1 Sm2011|AGG72633.1 7653R|AID33873.1 MAFF303099|WP_010912879.1 USDA_110|WP_038965127.1 113_2|113-2GL000185	Phosphoribosylformimino-5-aminoimidazole carboxamide ribotide isomerase	E
	Core cluster	USDA205|WP_014327906.1 Sm2011|AGG73801.1 7653R|AID29546.1 MAFF303099|WP_010915605.1 USDA_110|WP_011087784.1 113_2|113-2GL004261	Ubiquinol-cytochrome C chaperone	S
	Core cluster	USDA205|WP_050984027.1 Sm2011|AGG75484.1 7653R|AID33888.1 MAFF303099|WP_010912892.1 USDA_110|WP_011083938.1 113_2|113-2GL008505	xylulokinase	G
	Core cluster	USDA205|WP_037428803.1 Sm2011|AGG72069.1 7653R|AID32731.1 MAFF303099|WP_044548354.1 USDA_110|WP_011090269.1 113_2|113-2GL001606	ABC transporter	S
	Core cluster	USDA205|WP_014329739.1 Sm2011|AGG75364.1 7653R|AID33033.1 MAFF303099|WP_010912039.1 USDA_110|WP_011084322.1 113_2|113-2GL008074	Protein of unknown function (DUF1465)	S
	Core cluster	USDA205|WP_014328208.1 Sm2011|AGG74091.1 7653R|AID33198.1 MAFF303099|WP_010912225.1 USDA_110|WP_011089809.1 113_2|113-2GL002127	transport protein ExbD	P
	Core cluster	USDA205|WP_037393864.1 Sm2011|AGG75843.1 7653R|AID33298.1 MAFF303099|WP_010912321.1 USDA_110|WP_011083317.1 113_2|113-2GL000382	Specifically methylates guanosine-37 in various tR-s (By similarity)	J
	Core cluster	USDA205|WP_037401026.1 Sm2011|AGG74747.1 7653R|AID30969.1 MAFF303099|WP_044548030.1 USDA_110|WP_038966432.1 113_2|113-2GL002645	aminopeptidase	E
	Core cluster	USDA205|WP_012709224.1 Sm2011|AGG75264.1 7653R|AID32745.1 MAFF303099|WP_032931878.1 USDA_110|WP_028175820.1 113_2|113-2GL000708	cobaltochelatase, CobS subunit	H
	Core cluster	USDA205|WP_060563202.1 Sm2011|AGG73242.1 7653R|AID32245.1 MAFF303099|WP_010911276.1 USDA_110|WP_011089611.1 113_2|113-2GL002342	flagellar basal-body rod protein FlgG	N
	Core cluster	USDA205|WP_080577383.1 Sm2011|AGG75318.1 7653R|AID33003.2 MAFF303099|WP_010912012.1 USDA_110|WP_011089788.1 113_2|113-2GL002149	-	-
	Core cluster	USDA205|WP_014330115.1 Sm2011|AGG75674.1 7653R|AID33172.1 MAFF303099|WP_010912198.1 USDA_110|WP_011083378.1 113_2|113-2GL000313	pyrophosphate phospho-hydrolase	C
	Core cluster	USDA205|WP_060563957.1 Sm2011|AGG72730.1 7653R|AID27858.1 MAFF303099|WP_010913360.1 USDA_110|WP_011084248.1 113_2|113-2GL008151	Presumably involved in the processing and regular turnover of intracellular proteins. Catalyzes the removal of unsubstituted N-terminal amino acids from various peptides (By similarity)	E
	Core cluster	USDA205|WP_037391317.1 Sm2011|AGG73550.1 7653R|AID28929.1 MAFF303099|WP_010915006.1 USDA_110|WP_038966658.1 113_2|113-2GL000659	Branched-chain amino acid aminotransferase	E
	Core cluster	USDA205|WP_050984021.1 Sm2011|AGG75763.1 7653R|AID33102.2 MAFF303099|WP_010912109.1 USDA_110|WP_011083265.1 113_2|113-2GL000438	peptidase	D
	Core cluster	USDA205|WP_014330131.1 Sm2011|AGG75847.1 7653R|AID33292.1 MAFF303099|WP_010912314.1 USDA_110|WP_011085013.1 113_2|113-2GL007462	amino acid ABC transporter	E
	Core cluster	USDA205|WP_037393537.1 Sm2011|AGG75396.1 7653R|AID32337.1 MAFF303099|WP_010911355.1 USDA_110|WP_011090474.1 113_2|113-2GL001364	NfeD-like C-terminal, partner-binding	O, U
	Core cluster	USDA205|WP_037433417.1 Sm2011|AGG74183.1 7653R|AID30014.1 MAFF303099|WP_010909361.1 USDA_110|WP_097532087.1 113_2|113-2GL004835	Is required not only for elongation of protein synthesis but also for the initiation of all mR- translation through initiator tR-(fMet) aminoacylation (By similarity)	J
	Core cluster	USDA205|WP_060563875.1 Sm2011|AGG73380.1 7653R|AID29399.2 MAFF303099|WP_044551679.1 USDA_110|WP_038967299.1 113_2|113-2GL001650	Pseudouridine synthase	J
	Core cluster	USDA205|WP_037397880.1 Sm2011|AGG71402.1 7653R|AID32698.2 MAFF303099|WP_010911723.1 USDA_110|WP_011083558.1 113_2|113-2GL000103	extracellular solute-binding protein, family 1	P
	Core cluster	USDA205|WP_014330406.1 Sm2011|AGG72619.1 7653R|AID33936.1 MAFF303099|WP_010912936.1 USDA_110|WP_038965154.1 113_2|113-2GL000076	Histidine kinase	T
	Core cluster	USDA205|WP_037398774.1 Sm2011|AGG72849.1 7653R|AID33489.1 MAFF303099|WP_010912511.1 USDA_110|WP_028175920.1 113_2|113-2GL001025	Required for accurate and efficient protein synthesis under certain stress conditions. May act as a fidelity factor of the translation reaction, by catalyzing a one-codon backward translocation of tR-s on improperly translocated ribosomes. Back- translocation proceeds from a post-translocation (POST) complex to a pre-translocation (PRE) complex, thus giving elongation factor G a second chance to …	M
	Core cluster	USDA205|WP_037400419.1 Sm2011|AGG73998.1 7653R|AID30469.1 MAFF303099|WP_010909762.1 USDA_110|WP_011088269.1 113_2|113-2GL003715	phosphoribosyl-AMP cyclohydrolase	E
	Core cluster	USDA205|WP_037392676.1 Sm2011|AGG73444.1 7653R|AID32238.1 USDA_110|WP_011087477.1 113_2|113-2GL004587 MAFF303099|WP_044548294.1	Protein of unknown function (DUF1217)	S
	Core cluster	USDA205|WP_060563349.1 Sm2011|AGG74441.1 7653R|AID30056.1 MAFF303099|WP_010909450.1 USDA_110|WP_161537089.1 113_2|113-2GL005771	Phosphoriboisomerase A	G
	Core cluster	USDA205|WP_014327503.1 Sm2011|AGG73387.1 7653R|AID29409.2 MAFF303099|WP_157866215.1 USDA_110|WP_028174622.1 113_2|113-2GL001627	Inositol monophosphatase	G
	Core cluster	USDA205|WP_037392949.1 Sm2011|AGG74336.1 7653R|AID29706.1 MAFF303099|WP_010909117.1 USDA_110|WP_038967595.1 113_2|113-2GL003561	VWA containing CoxE family protein	S
	Core cluster	USDA205|WP_037393756.1 Sm2011|AGG75658.1 7653R|AID33283.1 MAFF303099|WP_010912304.1 USDA_110|WP_011083344.1 113_2|113-2GL000351	Succinate dehydrogenase hydrophobic membrane anchor	C
	Core cluster	USDA205|WP_014328143.1 Sm2011|AGG74022.1 7653R|AID29976.1 MAFF303099|WP_010909327.1 USDA_110|WP_011087562.1 113_2|113-2GL004493	Catalyzes the reversible conversion of 2- phosphoglycerate into phosphoenolpyruvate. It is essential for the degradation of carbohydrates via glycolysis (By similarity)	G
	Core cluster	USDA205|WP_153451737.1 Sm2011|AGG71403.1 7653R|AID32697.1 MAFF303099|WP_010911722.1 USDA_110|WP_011083557.1 113_2|113-2GL000104	sn-glycerol-3-phosphate transport system, permease protein	P
	Core cluster	USDA205|WP_014327038.1 Sm2011|AGG72953.1 7653R|AID33558.2 MAFF303099|WP_010912579.1 USDA_110|WP_028172453.1 113_2|113-2GL000166	coproporphyrinogen III oxidase	H
	Core cluster	USDA205|WP_080577785.1 Sm2011|AGG73359.1 7653R|AID28321.1 MAFF303099|WP_044549472.1 USDA_110|WP_011090273.1 113_2|113-2GL001602	Glycolate oxidase	C
	Core cluster	USDA205|WP_037396540.1 Sm2011|AGG74388.1 7653R|QGU20803.1 MAFF303099|WP_010909646.1 USDA_110|WP_011088558.1 113_2|113-2GL003390	Flagellar biosynthesis protein, FliO	S
	Core cluster	USDA205|WP_014328161.1 Sm2011|AGG74040.1 7653R|AID29991.1 MAFF303099|WP_010909346.1 USDA_110|WP_011087262.1 113_2|113-2GL004863	nitrogen assimilation regulatory protein ntrX	T
	Core cluster	USDA205|WP_037391105.1 Sm2011|AGG73769.1 7653R|AID29316.1 MAFF303099|WP_010915404.1 USDA_110|WP_011086895.1 113_2|113-2GL005355	ppx gppa phosphatase	T
	Core cluster	USDA205|WP_037398653.1 Sm2011|AGG75907.1 7653R|AID33182.1 MAFF303099|WP_010912209.1 USDA_110|WP_011090481.1 113_2|113-2GL001357	peptidyl-dipeptidase Dcp	E
	Core cluster	USDA205|WP_014327633.1 Sm2011|AGG73515.1 7653R|AID28842.1 MAFF303099|WP_010914931.1 USDA_110|WP_038965893.1 113_2|113-2GL006946	metallo-beta-lactamase family	S
	Core cluster	USDA205|WP_050983981.1 Sm2011|AGG73047.1 7653R|AID30620.2 MAFF303099|WP_044550560.1 USDA_110|WP_011089996.1 113_2|113-2GL001916	bifunctional proline dehydrogenase pyrroline-5-carboxylate dehydrogenase	E
	Core cluster	USDA205|WP_037391806.1 Sm2011|AGG73011.1 7653R|AID33377.1 MAFF303099|WP_010912400.1 USDA_110|WP_051000404.1 113_2|113-2GL003673	Dead deah box	L
	Core cluster	USDA205|WP_014329728.1 Sm2011|AGG75351.1 7653R|AID32896.1 MAFF303099|WP_010911917.1 USDA_110|WP_011084342.1 113_2|113-2GL008053	Activator of cell division through the inhibition of FtsZ GTPase activity, therefore promoting FtsZ assembly into bundles of protofilaments necessary for the formation of the division Z ring. It is recruited early at mid-cell but it is not essential for cell division (By similarity)	S
	Core cluster	USDA205|WP_037391002.1 Sm2011|AGG73827.1 7653R|AID29593.1 MAFF303099|WP_010915640.1 USDA_110|WP_038966315.1 113_2|113-2GL004306	Enoyl-CoA hydratase	I
	Core cluster	USDA205|WP_037399509.1 Sm2011|AGG73393.1 7653R|AID29414.1 MAFF303099|WP_010915490.1 USDA_110|WP_011090242.1 113_2|113-2GL001634	Uncharacterized protein conserved in bacteria (DUF2093)	S
	Core cluster	USDA205|WP_014330015.1 Sm2011|AGG75601.1 7653R|AID30220.1 MAFF303099|WP_010909603.1 USDA_110|WP_011085220.1 113_2|113-2GL007194	transcriptional regulator DeoR family	K
	Core cluster	USDA205|WP_037391077.1 Sm2011|AGG73792.1 7653R|AID29536.1 MAFF303099|WP_010915595.1 USDA_110|WP_011087791.1 113_2|113-2GL004253	riboflavin synthase subunit (alpha)	H
	Core cluster	USDA205|WP_037397259.1 Sm2011|AGG72865.1 7653R|AID33911.1 MAFF303099|WP_010912913.1 USDA_110|WP_011083532.1 113_2|113-2GL000131	Phenylalanyl-tR- synthetase alpha subunit	J
	Core cluster	USDA205|WP_037391350.1 Sm2011|AGG73543.1 7653R|AID28917.1 MAFF303099|WP_010914995.1 USDA_110|WP_011085846.1 113_2|113-2GL006472	Bacterial protein of unknown function (DUF853)	S
	Core cluster	USDA205|WP_037399044.1 Sm2011|AGG70418.1 7653R|AID34129.1 MAFF303099|WP_010913114.1 USDA_110|WP_011086350.1 113_2|113-2GL005955	ABC transporter permease protein	G
	Core cluster	USDA205|WP_037395294.1 Sm2011|AGG73258.1 7653R|AID32262.1 MAFF303099|WP_010911291.1 USDA_110|WP_028175236.1 113_2|113-2GL002370	Two component transcriptional regulator, winged helix family	K
	Core cluster	USDA205|WP_037431434.1 Sm2011|AGG72975.1 7653R|AID34153.2 MAFF303099|WP_010913139.1 USDA_110|WP_011083746.1 113_2|113-2GL008718	that it carries out the mismatch recognition step. This protein has a weak ATPase activity (By similarity)	L
	Core cluster	USDA205|WP_014330771.1 Sm2011|AGG72918.1 7653R|AID33602.1 MAFF303099|WP_010912665.1 USDA_110|WP_011083495.1 113_2|113-2GL000170	glutathione synthase	H
	Core cluster	USDA205|WP_153451755.1 Sm2011|AGG75598.1 7653R|AID34210.1 MAFF303099|WP_010913193.1 USDA_110|WP_011085922.1 113_2|113-2GL006390	-DH dehydrogenase (Ubiquinone), 24 kDa subunit	C
	Core cluster	USDA205|WP_012706736.1 Sm2011|AGG73095.1 7653R|AID32875.1 MAFF303099|WP_010911896.1 USDA_110|WP_008143479.1 113_2|113-2GL008530	phosphate regulon transcriptional regulatory protein PhoB	T
	Core cluster	USDA205|WP_014328342.1 Sm2011|AGG74225.1 7653R|AID30048.2 MAFF303099|WP_019858091.1 USDA_110|WP_011087359.1 113_2|113-2GL004743	Hemimethylated D- binding protein	S
	Core cluster	USDA205|WP_012709193.1 Sm2011|AGG75232.1 7653R|AID32682.1 MAFF303099|WP_032931835.1 USDA_110|WP_027544319.1 113_2|113-2GL008217	Hypoxia induced protein conserved region	S
	Core cluster	USDA205|WP_014328370.1 Sm2011|AGG74194.1 7653R|AID30142.2 MAFF303099|WP_010909536.1 USDA_110|WP_011087594.1 113_2|113-2GL004457	Represses a number of genes involved in the response to D- damage (SOS response), including recA and lexA. In the presence of single-stranded D-, RecA interacts with LexA causing an autocatalytic cleavage which disrupts the D--binding part of LexA, leading to derepression of the SOS regulon and eventually D- repair (By similarity)	K
	Core cluster	USDA205|WP_037395490.1 Sm2011|AGG74497.1 7653R|AID29784.1 MAFF303099|WP_010909190.1 USDA_110|WP_011088329.1 113_2|113-2GL003649	transferase	S
	Core cluster	USDA205|WP_014328175.1 Sm2011|AGG74056.1 7653R|AID29309.1 MAFF303099|WP_010915398.1 USDA_110|WP_011087219.1 113_2|113-2GL004910	amino acid ABC transporter	E
	Core cluster	USDA205|WP_014327110.1 Sm2011|AGG73021.1 7653R|AID33695.1 MAFF303099|WP_010912731.1 USDA_110|WP_038967753.1 113_2|113-2GL003351	reductase	O
	Core cluster	USDA205|WP_037400983.1 Sm2011|AGG74722.1 7653R|AID30921.1 MAFF303099|WP_010910193.1 USDA_110|WP_011089258.1 113_2|113-2GL002726	Stringent starvation protein B	S
	Core cluster	USDA205|WP_080577809.1 Sm2011|AGG73994.1 7653R|AID29790.1 MAFF303099|WP_044547476.1 USDA_110|WP_028175850.1 113_2|113-2GL003682	PAS domain	S
	Core cluster	USDA205|WP_037396732.1 Sm2011|AGG74937.1 7653R|AID32061.1 MAFF303099|WP_010911099.1 USDA_110|WP_011090180.1 113_2|113-2GL001700	Multi-copper polyphenol oxidoreductase laccase	S
	Core cluster	USDA205|WP_037393059.1 Sm2011|AGG74128.1 7653R|AID30368.1 MAFF303099|WP_010909729.1 USDA_110|WP_063921497.1 113_2|113-2GL003466	The glycine cleavage system catalyzes the degradation of glycine (By similarity)	E
	Core cluster	USDA205|WP_014327208.1 Sm2011|AGG73104.1 7653R|AID27882.1 MAFF303099|WP_044548896.1 USDA_110|WP_011083951.1 113_2|113-2GL008491	extracellular solute-binding protein, family 3	E
	Core cluster	USDA205|WP_037398703.1 Sm2011|AGG72586.1 7653R|AID33453.1 MAFF303099|WP_010912481.1 USDA_110|WP_011083467.1 113_2|113-2GL000198	D- polymerase III, epsilon subunit	L
	Core cluster	USDA205|WP_037391163.1 Sm2011|AGG73699.1 7653R|AID29073.1 MAFF303099|WP_010915144.1 USDA_110|WP_011086576.1 113_2|113-2GL005724	ABC transporter	V
	Core cluster	USDA205|WP_014329125.1 Sm2011|AGG74946.1 7653R|AID32072.1 MAFF303099|WP_010911108.1 USDA_110|WP_011090175.1 113_2|113-2GL001705	This is one of the proteins that binds to the 5S R- in the ribosome where it forms part of the central protuberance (By similarity)	J
	Core cluster	USDA205|WP_050984023.1 Sm2011|AGG75526.1 7653R|AID30596.2 MAFF303099|WP_010909932.1 USDA_110|WP_011082941.1 113_2|113-2GL000782	maleylacetoacetate isomerase	Q
	Core cluster	USDA205|WP_012707762.1 Sm2011|AGG73946.1 7653R|AID29908.1 MAFF303099|WP_006205456.1 USDA_110|WP_011088142.1 113_2|113-2GL003863	One of the proteins that surrounds the polypeptide exit tunnel on the outside of the subunit (By similarity)	J
	Core cluster	USDA205|WP_014327725.1 Sm2011|AGG73596.1 7653R|AID28973.2 MAFF303099|WP_010915047.1 USDA_110|WP_011085909.1 113_2|113-2GL006403	cytochrome c-type biogenesis protein	O
	Core cluster	USDA205|WP_014328173.1 Sm2011|AGG74054.1 7653R|AID29311.1 MAFF303099|WP_010915400.1 USDA_110|WP_011087221.1 113_2|113-2GL004908	ABC transporter	E
	Core cluster	USDA205|WP_014329138.1 Sm2011|AGG74956.1 7653R|AID32104.2 MAFF303099|WP_010911138.1 USDA_110|WP_028175034.1 113_2|113-2GL007156	Protein of unknown function (DUF1285)	S
	Core cluster	USDA205|WP_014329827.1 Sm2011|AGG75454.1 7653R|AID34005.1 MAFF303099|WP_044548764.1 USDA_110|WP_028171680.1 113_2|113-2GL004314	peptidase c26	S
	Core cluster	USDA205|WP_014329743.1 Sm2011|AGG75367.1 7653R|AID33046.1 MAFF303099|WP_010912054.1 USDA_110|WP_011084326.1 113_2|113-2GL008070	ompa motb domain protein	N
	Core cluster	USDA205|WP_014330185.1 Sm2011|AGG75873.1 7653R|AID32992.1 MAFF303099|WP_044548384.1 USDA_110|WP_011085012.1 113_2|113-2GL007464	extracellular solute-binding protein	E
	Core cluster	USDA205|WP_037399589.1 Sm2011|AGG73365.1 7653R|AID34151.1 MAFF303099|WP_010913137.1 USDA_110|WP_049832629.1 113_2|113-2GL002760	Domain of unknown function (DUF305)	S
	Core cluster	USDA205|WP_037396053.1 Sm2011|AGG72135.1 7653R|AID33732.2 MAFF303099|WP_010912768.1 USDA_110|WP_011088246.1 113_2|113-2GL003746	oxidoreductase protein	C
	Core cluster	USDA205|WP_037401223.1 Sm2011|AGG73360.1 7653R|AID28322.1 MAFF303099|WP_010914423.1 USDA_110|WP_011090272.1 113_2|113-2GL001603	glycolate oxidase, iron-sulfur subunit	C
	Core cluster	USDA205|WP_014327530.1 Sm2011|AGG73417.1 7653R|AID28743.1 MAFF303099|WP_010914830.1 USDA_110|WP_011085308.1 113_2|113-2GL007094	Endonuclease that specifically degrades the R- of R-- D- hybrids (By similarity)	L
	Core cluster	USDA205|WP_037393867.1 Sm2011|AGG75842.1 7653R|AID33299.1 MAFF303099|WP_010912322.1 USDA_110|WP_011083314.1 113_2|113-2GL000385	An accessory protein needed during the final step in the assembly of 30S ribosomal subunit, possibly for assembly of the head region. Probably interacts with S19. Essential for efficient processing of 16S rR-. May be needed both before and after RbfA during the maturation of 16S rR-. It has affinity for free ribosomal 30S subunits but not for 70S ribosomes (By similarity)	J
	Core cluster	USDA205|WP_037393773.1 Sm2011|AGG75789.1 7653R|AID33264.2 MAFF303099|WP_010912288.1 USDA_110|WP_011083444.1 113_2|113-2GL000225	cell division protein FtsK	D
	Core cluster	USDA205|WP_014329312.1 Sm2011|AGG75075.1 7653R|AID33078.1 MAFF303099|WP_010912087.1 USDA_110|WP_011088419.1 113_2|113-2GL003549	ABC transporter	E
	Core cluster	USDA205|WP_037435191.1 Sm2011|AGG75402.1 7653R|AID32344.1 MAFF303099|WP_010911362.1 USDA_110|WP_011090468.1 113_2|113-2GL001370	Glutamate synthase	E
	Core cluster	USDA205|WP_037397811.1 Sm2011|AGG72041.1 7653R|AID28540.1 USDA_110|WP_011085988.1 113_2|113-2GL006317 MAFF303099|WP_010914656.1	GntR Family Transcriptional Regulator	K
	Core cluster	USDA205|WP_014327608.1 Sm2011|AGG73497.1 7653R|AID28823.1 MAFF303099|WP_010914906.1 USDA_110|WP_011084002.1 113_2|113-2GL008437	N-acetyltransferase	J
	Core cluster	USDA205|WP_014327228.1 Sm2011|AGG73126.1 7653R|AID27916.1 MAFF303099|WP_027047739.1 USDA_110|WP_028172810.1 113_2|113-2GL008479	-	-
	Core cluster	USDA205|WP_080577713.1 Sm2011|AGG73367.1 7653R|AID28327.2 MAFF303099|WP_010914430.1 USDA_110|WP_011090191.1 113_2|113-2GL001690	histidyl-tR- synthetase	J
	Core cluster	USDA205|WP_037431978.1 Sm2011|AGG71725.1 7653R|AID31074.1 MAFF303099|WP_010910342.1 USDA_110|WP_162494196.1 113_2|113-2GL008096	sulfate ABC transporter, inner membrane subunit cyst	P
	Core cluster	USDA205|WP_037392623.1 Sm2011|AGG73479.1 7653R|QGU20902.1 MAFF303099|WP_010914866.1 USDA_110|WP_011085417.1 113_2|113-2GL006932	5-enolpyruvylshikimate-3-phosphate phospholyase	E
	Core cluster	USDA205|WP_014329531.1 Sm2011|AGG75228.1 7653R|AID32677.2 MAFF303099|WP_044548346.1 USDA_110|WP_011084189.1 113_2|113-2GL008220	D--3-methyladenine glycosylase II	L
	Core cluster	USDA205|WP_003543812.1 Sm2011|AGG75863.1 7653R|AID32931.1 MAFF303099|WP_008834724.1 USDA_110|WP_007598106.1 113_2|113-2GL008693	50S ribosomal protein L32	J
	Core cluster	USDA205|WP_014328176.1 Sm2011|AGG74057.1 7653R|AID29308.2 MAFF303099|WP_010915397.1 USDA_110|WP_011087218.1 113_2|113-2GL004911	glutamate glutamine aspartate asparagine ABC transporter, periplasmic substrate-binding protein	E
	Core cluster	USDA205|WP_037397623.1 Sm2011|AGG74135.1 7653R|AID29746.1 MAFF303099|WP_044547456.1 USDA_110|WP_011087047.1 113_2|113-2GL005178	reductase	F
	Core cluster	USDA205|WP_014329745.1 Sm2011|AGG75369.1 7653R|AID33043.1 MAFF303099|WP_010912051.1 USDA_110|WP_011084333.1 113_2|113-2GL008063	inositol mono-phosphatase	G
	Core cluster	USDA205|WP_037396985.1 Sm2011|AGG74783.1 7653R|AID31001.1 MAFF303099|WP_044548043.1 USDA_110|WP_011083637.1 113_2|113-2GL000018	beta-lactamase	V
	Core cluster	USDA205|WP_037399633.1 Sm2011|AGG72979.1 7653R|AID34145.1 MAFF303099|WP_010913129.1 USDA_110|WP_011083624.1 113_2|113-2GL000030	Tryptophanyl-tR- synthetase	J
	Core cluster	USDA205|WP_012707548.1 Sm2011|AGG73806.1 7653R|AID29552.1 MAFF303099|WP_027046741.1 USDA_110|WP_011087779.1 113_2|113-2GL004266	transcriptional regulator, merr family	K
	Core cluster	USDA205|WP_037393675.1 Sm2011|AGG75327.1 7653R|AID33016.2 MAFF303099|WP_010912023.1 USDA_110|WP_011089882.1 113_2|113-2GL002051	Ligates lysine onto the cytidine present at position 34 of the AUA codon-specific tR-(Ile) that contains the anticodon CAU, in an ATP-dependent manner. Cytidine is converted to lysidine, thus changing the amino acid specificity of the tR- from methionine to isoleucine (By similarity)	D
	Core cluster	USDA205|WP_037397121.1 Sm2011|AGG74652.1 7653R|AID31202.1 MAFF303099|WP_010910452.1 USDA_110|WP_011085398.1 113_2|113-2GL006951	Aminotransferase class I and II	K
	Core cluster	USDA205|WP_012707629.1 Sm2011|AGG73855.1 7653R|AID30776.1 MAFF303099|WP_010910102.1 USDA_110|WP_011087674.1 113_2|113-2GL004367	#NAME?	C
	Core cluster	USDA205|WP_014327901.1 Sm2011|AGG73796.1 7653R|AID29537.1 MAFF303099|WP_010915596.1 USDA_110|WP_011087790.1 113_2|113-2GL004254	Catalyzes the formation of 6,7-dimethyl-8- ribityllumazine by condensation of 5-amino-6-(D- ribitylamino)uracil with 3,4-dihydroxy-2-butanone 4-phosphate. This is the penultimate step in the biosynthesis of riboflavin (By similarity)	H
	Core cluster	USDA205|WP_037398346.1 Sm2011|AGG72718.1 7653R|AID27845.1 MAFF303099|WP_044548879.1 USDA_110|WP_011084261.1 113_2|113-2GL008137	-	-
	Core cluster	USDA205|WP_014328066.1 Sm2011|AGG73938.1 7653R|AID29900.1 MAFF303099|WP_010909276.1 USDA_110|WP_011088148.1 113_2|113-2GL003855	One of the primary rR- binding proteins. Required for association of the 30S and 50S subunits to form the 70S ribosome, for tR- binding and peptide bond formation. It has been suggested to have peptidyltransferase activity	J
	Core cluster	USDA205|WP_014329505.1 Sm2011|AGG75201.1 7653R|AID32638.1 MAFF303099|WP_010911667.1 USDA_110|WP_011083052.1 113_2|113-2GL000668	-	-
	Core cluster	USDA205|WP_014329122.1 Sm2011|AGG74943.1 7653R|AID28198.1 MAFF303099|WP_010914204.1 USDA_110|WP_011087552.1 113_2|113-2GL004505	Aldehyde dehydrogenase	C
	Core cluster	USDA205|WP_037394609.1 Sm2011|AGG75290.1 7653R|AID29449.1 MAFF303099|WP_010915525.1 USDA_110|WP_011088984.1 113_2|113-2GL002936	Formiminoglutamate deiminase	F
	Core cluster	USDA205|WP_014330114.1 Sm2011|AGG75676.1 7653R|AID33173.1 MAFF303099|WP_010912199.1 USDA_110|WP_008136728.1 113_2|113-2GL000314	GCN5-related N-acetyltransferase	S
	Core cluster	USDA205|WP_014329908.1 Sm2011|AGG75530.1 7653R|AID29442.1 MAFF303099|WP_032933331.1 USDA_110|WP_038967454.1 113_2|113-2GL000539	Transcriptional regulator	K
	Core cluster	USDA205|WP_012707855.1 Sm2011|AGG74038.1 7653R|AID29989.1 MAFF303099|WP_010909344.1 USDA_110|WP_011087260.1 113_2|113-2GL004866	nitrogen	T
	Core cluster	USDA205|WP_037394049.1 Sm2011|AGG75512.1 7653R|AID30792.1 MAFF303099|WP_010910118.1 USDA_110|WP_011086049.1 113_2|113-2GL006257	precorrin-8x methylmutase	H
	Core cluster	USDA205|WP_037391162.1 Sm2011|AGG73703.1 7653R|AID29091.1 MAFF303099|WP_032929556.1 USDA_110|WP_011086836.1 113_2|113-2GL005423	glutamine phosphoribosylpyrophosphate amidotransferase	F
	Core cluster	USDA205|WP_037394374.1 Sm2011|AGG75072.1 7653R|AID33075.1 MAFF303099|WP_010912084.1 USDA_110|WP_011088421.1 113_2|113-2GL003547	extracellular ligand-binding receptor	E
	Core cluster	USDA205|WP_037394130.1 Sm2011|AGG75487.1 7653R|AID33694.1 MAFF303099|WP_010912730.1 USDA_110|WP_011089361.1 113_2|113-2GL002610	drug resistance transporter, EmrB QacA subfamily	P
	Core cluster	USDA205|WP_014328074.1 Sm2011|AGG73955.1 7653R|AID29917.1 MAFF303099|WP_010909287.1 USDA_110|WP_011088135.1 113_2|113-2GL003872	The central subunit of the protein translocation channel SecYEG. Consists of two halves formed by TMs 1-5 and 6-10. These two domains form a lateral gate at the front which open onto the bilayer between TMs 2 and 7, and are clamped together by SecE at the back. The channel is closed by both a pore ring composed of hydrophobic SecY resides and a short helix (helix 2A) on the extracellular side of …	U
	Core cluster	USDA205|WP_014327568.1 Sm2011|AGG73456.1 7653R|AID28797.2 MAFF303099|WP_010914881.1 USDA_110|WP_011085434.1 113_2|113-2GL006914	23S rR-	J
	Core cluster	USDA205|WP_037394372.1 Sm2011|AGG75074.1 7653R|AID33077.1 MAFF303099|WP_010912086.1 USDA_110|WP_011088420.1 113_2|113-2GL003548	ABC transporter	E
	Core cluster	USDA205|WP_037396632.1 Sm2011|AGG74431.1 7653R|AID30314.1 MAFF303099|WP_010909681.1 USDA_110|WP_011086561.1 113_2|113-2GL005740	#NAME?	H
	Core cluster	USDA205|WP_153451853.1 Sm2011|AGG75313.1 7653R|AID32168.2 MAFF303099|WP_044548284.1 USDA_110|WP_011084978.1 113_2|113-2GL007506	-	-
	Core cluster	USDA205|WP_014330712.1 Sm2011|AGG72861.1 7653R|AID33916.1 MAFF303099|WP_010912916.1 USDA_110|WP_011083536.1 113_2|113-2GL000125	Alpha beta hydrolase	S
	Core cluster	USDA205|WP_037469262.1 Sm2011|AGG74751.1 7653R|AID29799.1 MAFF303099|WP_010909202.1 USDA_110|WP_011086824.1 113_2|113-2GL005435	Catalyzes the reversible reaction in which hydroxymethyl group from 5,10-methylenetetrahydrofolate is tranferred onto alpha-ketoisovalerate to form ketopantoate (By similarity)	H
	Core cluster	USDA205|WP_014327680.1 Sm2011|AGG73552.1 7653R|AID28930.1 MAFF303099|WP_010915007.1 USDA_110|WP_014491764.1 113_2|113-2GL001339	Destroys radicals which are normally produced within the cells and which are toxic to biological systems (By similarity)	P
	Core cluster	USDA205|WP_037396533.1 Sm2011|AGG74383.1 7653R|AID29663.1 MAFF303099|WP_010909076.1 USDA_110|WP_038967195.1 113_2|113-2GL003467	Catalyzes the attachment of alanine to tR-(Ala) in a two-step reaction alanine is first activated by ATP to form Ala- AMP and then transferred to the acceptor end of tR-(Ala). Also edits incorrectly charged Ser-tR-(Ala) and Gly-tR-(Ala) via its editing domain (By similarity)	J
	Core cluster	USDA205|WP_037398678.1 Sm2011|AGG75929.1 7653R|AID33138.1 MAFF303099|WP_010912164.1 USDA_110|WP_011083450.1 113_2|113-2GL000217	alanine racemase domain protein	E
	Core cluster	USDA205|WP_037394731.1 Sm2011|AGG75211.1 7653R|AID32656.2 MAFF303099|WP_032931818.1 USDA_110|WP_011083041.1 113_2|113-2GL000680	Competence protein f	S
	Core cluster	USDA205|WP_037398878.1 Sm2011|AGG72523.1 7653R|AID30263.1 MAFF303099|WP_010909638.1 USDA_110|WP_011084268.1 113_2|113-2GL008129	ABC transporter, (ATP-binding protein)	E
	Core cluster	USDA205|WP_037393526.1 Sm2011|AGG75400.1 7653R|AID32342.1 MAFF303099|WP_044548308.1 USDA_110|WP_011084313.1 113_2|113-2GL008082	Protein of unknown function (DUF459)	S
	Core cluster	USDA205|WP_014328901.1 Sm2011|AGG74701.1 7653R|AID34152.1 MAFF303099|WP_010913138.1 USDA_110|WP_038965817.1 113_2|113-2GL006732	Aldo keto reductase	C
	Core cluster	USDA205|WP_012708798.1 Sm2011|AGG74922.1 7653R|AID32043.1 MAFF303099|WP_008877668.1 USDA_110|WP_008544396.1 113_2|113-2GL001679	Cold shock protein	K
	Core cluster	USDA205|WP_014328127.1 Sm2011|AGG74006.1 7653R|AID30390.1 MAFF303099|WP_010909752.1 USDA_110|WP_038967533.1 113_2|113-2GL003695	nitroreductase	C
	Core cluster	USDA205|WP_014328465.1 Sm2011|AGG74187.1 7653R|AID30017.1 MAFF303099|WP_010909366.1 USDA_110|WP_038967564.1 113_2|113-2GL004832	Carboxypeptidase	M
	Core cluster	USDA205|WP_014327951.1 Sm2011|AGG73814.1 7653R|AID29569.1 MAFF303099|WP_010915618.1 USDA_110|WP_011087736.1 113_2|113-2GL004296	glycosyl transferase group 1	M
	Core cluster	USDA205|WP_037398877.1 Sm2011|AGG72522.1 7653R|AID30262.1 MAFF303099|WP_010909637.1 USDA_110|WP_011084269.1 113_2|113-2GL008128	ABC transporter, (ATP-binding protein)	E
	Core cluster	USDA205|WP_153451774.1 Sm2011|AGG73908.1 7653R|AID29815.1 MAFF303099|WP_010909216.1 USDA_110|WP_011087079.1 113_2|113-2GL005143	N-acetylmuramoyl-L-alanine amidase	M
	Core cluster	USDA205|WP_153451566.1 Sm2011|AGG75082.1 7653R|AID29503.1 MAFF303099|WP_010915571.1 USDA_110|WP_011086030.1 113_2|113-2GL006276	glyoxalase bleomycin resistance protein dioxygenase	E
	Core cluster	USDA205|WP_037399793.1 Sm2011|AGG70484.1 7653R|AID32163.1 MAFF303099|WP_010911191.1 USDA_110|WP_011090570.1 113_2|113-2GL001261	Dehydrogenase	S
	Core cluster	USDA205|WP_037398296.1 Sm2011|AGG72743.1 7653R|AID33571.2 MAFF303099|WP_010912593.1 USDA_110|WP_011083512.1 113_2|113-2GL000152	Catalyzes the interconversion of 2-phosphoglycerate and 3-phosphoglycerate (By similarity)	G
	Core cluster	USDA205|WP_037431273.1 Sm2011|AGG73728.1 7653R|AID29117.1 MAFF303099|WP_010915178.1 USDA_110|WP_011086876.1 113_2|113-2GL005376	Specifically dimethylates two adjacent adenosines (A1518 and A1519) in the loop of a conserved hairpin near the 3'-end of 16S rR- in the 30S particle. May play a critical role in biogenesis of 30S subunits (By similarity)	J
	Core cluster	USDA205|WP_037393469.1 Sm2011|AGG74060.1 7653R|AID29313.1 MAFF303099|WP_032929729.1 USDA_110|WP_007602543.1 113_2|113-2GL003639	Zinc-finger domain	S
	Core cluster	USDA205|WP_037398680.1 Sm2011|AGG75930.1 7653R|AID33137.1 MAFF303099|WP_010912163.1 USDA_110|WP_011083454.1 113_2|113-2GL000213	Leucyl-tR- synthetase	J
	Core cluster	USDA205|WP_081319006.1 Sm2011|AGG72814.1 7653R|AID34292.1 MAFF303099|WP_010913287.1 USDA_110|WP_011089424.1 113_2|113-2GL002544	lytic murein transglycosylase	M
	Core cluster	USDA205|WP_014329707.1 Sm2011|AGG75332.1 7653R|AID33021.2 MAFF303099|WP_027047494.1 USDA_110|WP_011089889.1 113_2|113-2GL002042	biopolymer transport protein ExbD TolR	U
	Core cluster	USDA205|WP_037392585.1 Sm2011|AGG73502.1 7653R|AID28827.1 MAFF303099|WP_010914910.1 USDA_110|WP_011083618.1 113_2|113-2GL000037	HAD-superfamily hydrolase subfamily IA variant 3	S
	Core cluster	USDA205|WP_037398756.1 Sm2011|AGG72842.1 7653R|AID32535.1 MAFF303099|WP_010911565.1 USDA_110|WP_011083544.1 113_2|113-2GL000117	3-5 exonuclease	J
	Core cluster	USDA205|WP_037397283.1 Sm2011|AGG72872.1 7653R|AID32411.2 MAFF303099|WP_044550890.1 USDA_110|WP_011088192.1 113_2|113-2GL003808	Short chain dehydrogenase	S
	Core cluster	USDA205|WP_037401742.1 Sm2011|AGG73966.1 7653R|AID29932.1 MAFF303099|WP_044547538.1 USDA_110|WP_011088120.1 113_2|113-2GL003889	ATP12 ATPase	O
	Core cluster	USDA205|WP_037396626.1 Sm2011|AGG74425.1 USDA_110|WP_011086569.1 113_2|113-2GL005732 7653R|QGU20799.1 MAFF303099|WP_010909676.1	Protein of unknown function (DUF2865)	S
	Core cluster	USDA205|WP_037394502.1 Sm2011|AGG75030.1 7653R|AID33769.2 MAFF303099|WP_010912804.1 USDA_110|WP_011086010.1 113_2|113-2GL006296	Fggy-family pentulose kinase	C
	Core cluster	USDA205|WP_014329724.1 Sm2011|AGG75348.1 7653R|AID33063.1 MAFF303099|WP_010912071.1 USDA_110|WP_028173440.1 113_2|113-2GL008051	Ser Thr protein phosphatase family protein	S
	Core cluster	USDA205|WP_014328428.1 Sm2011|AGG74147.1 7653R|AID31958.1 MAFF303099|WP_010911009.1 USDA_110|WP_011090115.1 113_2|113-2GL001779	thioredoxin reductase	O
	Core cluster	USDA205|WP_037431976.1 Sm2011|AGG71727.1 7653R|AID29459.1 MAFF303099|WP_010915534.1 USDA_110|WP_011086741.1 113_2|113-2GL005524	Alanine racemase domain protein	E
	Core cluster	USDA205|WP_014330798.1 Sm2011|AGG72925.1 7653R|AID34164.2 MAFF303099|WP_010913150.1 USDA_110|WP_011083581.1 113_2|113-2GL000075	This enzyme is involved in nucleotide metabolism it produces dUMP, the immediate precursor of thymidine nucleotides and it decreases the intracellular concentration of dUTP so that uracil cannot be incorporated into D- (By similarity)	F
	Core cluster	USDA205|WP_014330407.1 Sm2011|AGG72620.1 7653R|AID33937.1 MAFF303099|WP_010912937.1 USDA_110|WP_011088685.1 113_2|113-2GL003259	May play a key role in the regulation of the intracellular concentration of adenosylhomocysteine (By similarity)	H
	Core cluster	USDA205|WP_037397358.1 Sm2011|AGG72899.1 7653R|AID32075.2 MAFF303099|WP_010911112.1 USDA_110|WP_011085408.1 113_2|113-2GL006941	Mg2 transporter protein, CorA family protein	P
	Core cluster	USDA205|WP_060563316.1 Sm2011|AGG73861.1 7653R|AID30770.2 MAFF303099|WP_010910096.1 USDA_110|WP_028171719.1 113_2|113-2GL004373	metallo-beta-lactamase	S
	Core cluster	USDA205|WP_012708163.1 Sm2011|AGG74366.1 7653R|AID29681.2 MAFF303099|WP_010909091.1 USDA_110|WP_011088457.1 113_2|113-2GL003507	Glutaredoxin	O
	Core cluster	USDA205|WP_037394030.1 Sm2011|AGG75522.1 7653R|AID33435.2 MAFF303099|WP_010912464.1 USDA_110|WP_011089072.1 113_2|113-2GL002842	2-oxoisovalerate dehydrogenase	C
	Core cluster	USDA205|WP_037428403.1 Sm2011|AGG72456.1 7653R|AID29523.1 MAFF303099|WP_010915584.1 USDA_110|WP_011086733.1 113_2|113-2GL005533	enoyl-CoA hydratase isomerase	I
	Core cluster	USDA205|WP_037391023.1 Sm2011|AGG73816.1 7653R|QGU20851.1 MAFF303099|WP_010915620.1 USDA_110|WP_011087735.1 113_2|113-2GL004297	(lipopolysaccharide biosynthesis) protein	M
	Core cluster	USDA205|WP_037396453.1 Sm2011|AGG74182.1 7653R|AID30013.1 MAFF303099|WP_010909360.1 USDA_110|WP_011087286.1 113_2|113-2GL004836	hydrolase TatD family	L
	Core cluster	USDA205|WP_037391208.1 Sm2011|AGG73667.1 7653R|AID29038.1 MAFF303099|WP_010915107.1 USDA_110|WP_011087819.1 113_2|113-2GL004214	Involved in D- repair and RecF pathway recombination (By similarity)	L
	Core cluster	USDA205|WP_014328891.1 Sm2011|AGG74691.1 7653R|AID30329.1 MAFF303099|WP_032930422.1 USDA_110|WP_038967889.1 113_2|113-2GL003676	Secreted repeat of unknown function	S
	Core cluster	USDA205|WP_037391329.1 Sm2011|AGG73532.1 7653R|AID32913.2 MAFF303099|WP_032932001.1 USDA_110|WP_011084319.1 113_2|113-2GL008076	Quinone oxidoreductase	C
	Core cluster	USDA205|WP_037428491.1 Sm2011|AGG72440.1 7653R|AID29194.1 MAFF303099|WP_010915243.1 USDA_110|WP_011086528.1 113_2|113-2GL005779	regulator	T
	Core cluster	USDA205|WP_014328022.1 Sm2011|AGG73884.1 7653R|AID30191.1 MAFF303099|WP_010909582.1 USDA_110|WP_011087859.1 113_2|113-2GL004173	Aspartate transcarbamylase	F
	Core cluster	USDA205|WP_014331420.1 Sm2011|AGG72365.1 7653R|AID31306.1 MAFF303099|WP_010910549.1 USDA_110|WP_011086985.1 113_2|113-2GL005250	site-determining protein	D
	Core cluster	USDA205|WP_037398690.1 Sm2011|AGG75937.1 7653R|AID33444.1 MAFF303099|WP_010912472.1 USDA_110|WP_011083461.1 113_2|113-2GL000206	Exhibits a very high intrinsic GTPase hydrolysis rate. Involved in the addition of a carboxymethylaminomethyl (cmnm) group at the wobble position (U34) of certain tR-s, forming tR-- cmnm(5)s(2)U34 (By similarity)	S
	Core cluster	USDA205|WP_037396948.1 Sm2011|AGG74759.1 7653R|AID30978.1 MAFF303099|WP_010910249.1 USDA_110|WP_011089337.1 113_2|113-2GL002636	This protein may be involved in anomalous filament growth. May be a component of the septum (By similarity)	D
	Core cluster	USDA205|WP_014328088.1 Sm2011|AGG73971.1 7653R|AID30362.1 MAFF303099|WP_044547718.1 USDA_110|WP_011083767.1 113_2|113-2GL008696	Protein of unknown function (DUF1345)	S
	Core cluster	USDA205|WP_037394513.1 Sm2011|AGG75023.1 7653R|AID30611.1 MAFF303099|WP_010909942.1 USDA_110|WP_011089816.1 113_2|113-2GL002119	Part of the ABC transporter complex HmuTUV involved in hemin import. Responsible for energy coupling to the transport system (By similarity)	P
	Core cluster	USDA205|WP_037395207.1 Sm2011|AGG73313.1 7653R|AID34230.1 MAFF303099|WP_010913211.1 USDA_110|WP_011085650.1 113_2|113-2GL006674	Binding-protein-dependent transport systems inner membrane component	P
	Core cluster	USDA205|WP_037396525.1 Sm2011|AGG74373.1 7653R|AID31264.1 MAFF303099|WP_044548145.1 USDA_110|WP_011089633.1 113_2|113-2GL002321	AAA ATPase	S
	Core cluster	USDA205|WP_037435458.1 Sm2011|AGG71813.1 7653R|AID31070.2 MAFF303099|WP_010910338.1 USDA_110|WP_011087210.1 113_2|113-2GL004921	alpha-2-macroglobulin domain protein	S
	Core cluster	USDA205|WP_037392632.1 Sm2011|AGG73473.1 7653R|AID28777.1 MAFF303099|WP_010914860.1 USDA_110|WP_011085410.1 113_2|113-2GL006939	Catalyzes the oxidation of either pyridoxine 5'- phosphate (PNP) or pyridoxamine 5'-phosphate (PMP) into pyridoxal 5'-phosphate (PLP) (By similarity)	H
	Core cluster	USDA205|WP_014328147.1 Sm2011|AGG74026.1 7653R|QGU20824.1 MAFF303099|WP_010909333.1 USDA_110|WP_011087547.1 113_2|113-2GL004510	pyruvate dehydrogenase complex	C
	Core cluster	USDA205|WP_037436050.1 Sm2011|AGG74140.1 7653R|AID30238.2 MAFF303099|WP_010909619.1 USDA_110|WP_011087464.1 113_2|113-2GL004618	D- gyrase negatively supercoils closed circular double- stranded D- in an ATP-dependent manner and also catalyzes the interconversion of other topological isomers of double-stranded D- rings, including catenanes and knotted rings (By similarity)	L
	Core cluster	USDA205|WP_037434363.1 Sm2011|AGG74281.1 7653R|AID33827.2 MAFF303099|WP_010913488.1 USDA_110|WP_011084959.1 113_2|113-2GL007521	Transketolase	G
	Core cluster	USDA205|WP_040959293.1 Sm2011|AGG72759.1 USDA_110|WP_028174794.1 113_2|113-2GL006731 7653R|AID34000.2 MAFF303099|WP_044551118.1	Membrane	S
	Core cluster	USDA205|WP_037391940.1 Sm2011|AGG73133.1 7653R|AID27929.1 MAFF303099|WP_010913430.1 USDA_110|WP_011084017.1 113_2|113-2GL008420	Histidine kinase	T
	Dispensable cluster	USDA205|WP_014858009.1 Sm2011|AGG70175.1 7653R|AID34353.2 USDA_110|WP_026192137.1 113_2|113-2GL000830 7653R|AID34604.2	-	-
	Core cluster	USDA205|WP_037393779.1 Sm2011|AGG75785.1 7653R|AID33271.1 MAFF303099|WP_010912293.1 USDA_110|WP_011083432.1 113_2|113-2GL000237	Ubiquinone biosynthesis hydroxylase, UbiH UbiF VisC COQ6 family	H
	Core cluster	USDA205|WP_014328321.1 Sm2011|AGG74253.1 7653R|AID30041.2 MAFF303099|WP_044547617.1 USDA_110|WP_011088897.1 113_2|113-2GL003032	ABC transporter	S
	Core cluster	USDA205|WP_097587317.1 Sm2011|AGG75920.1 7653R|AID33159.1 MAFF303099|WP_010912184.1 USDA_110|WP_011083411.1 113_2|113-2GL000260	Major facilitator superfamily	G
	Core cluster	USDA205|WP_014327198.1 Sm2011|AGG73093.1 7653R|AID32877.2 MAFF303099|WP_010911898.1 USDA_110|WP_011083914.1 113_2|113-2GL008532	Part of the ABC transporter complex PstSACB involved in phosphate import. Responsible for energy coupling to the transport system (By similarity)	P
	Core cluster	USDA205|WP_014327890.1 Sm2011|AGG73784.1 7653R|AID29500.1 MAFF303099|WP_010915564.1 USDA_110|WP_028171628.1 113_2|113-2GL004238	Rdd domain-containing protein	S
	Core cluster	USDA205|WP_014330426.1 Sm2011|AGG72639.1 7653R|AID33866.1 MAFF303099|WP_032932595.1 USDA_110|WP_011083473.1 113_2|113-2GL000192	this subunit has chaperone activity. The binding of ATP and its subsequent hydrolysis by HslU are essential for unfolding of protein substrates subsequently hydrolyzed by HslV. HslU recognizes the N-terminal part of its protein substrates and unfolds these before they are guided to HslV for hydrolysis (By similarity)	O
	Core cluster	USDA205|WP_014330660.1 Sm2011|AGG72816.1 7653R|AID34322.1 MAFF303099|WP_010913319.1 USDA_110|WP_011083608.1 113_2|113-2GL000047	Required for maturation of 30S ribosomal subunits (By similarity)	S
	Core cluster	USDA205|WP_012709175.1 Sm2011|AGG75215.1 7653R|AID32660.1 MAFF303099|WP_010911688.1 USDA_110|WP_011083039.1 113_2|113-2GL000682	mutator MutT protein	L
	Core cluster	USDA205|WP_037393015.1 Sm2011|AGG74130.1 USDA_110|WP_011087647.1 113_2|113-2GL004397 7653R|AID32558.1 MAFF303099|WP_010911588.1	Protein of unknown function (DUF461)	S
	Dispensable cluster	USDA205|WP_060563250.1 7653R|QGU21080.1 MAFF303099|WP_044551210.1 USDA_110|WP_011084894.1 113_2|113-2GL007591 MAFF303099|WP_044552119.1	Adenosylmethionine--8-amino-7-oxononanoate aminotransferase	H
	Core cluster	USDA205|WP_037394246.1 Sm2011|AGG75430.1 7653R|AID32213.2 MAFF303099|WP_010911245.1 USDA_110|WP_011085763.1 113_2|113-2GL006559	transglutaminase domain protein	E
	Core cluster	USDA205|WP_014328041.1 Sm2011|AGG73901.1 7653R|AID29807.1 MAFF303099|WP_010909210.1 113_2|113-2GL005158 USDA_110|WP_011087065.1	Catalyzes a trans-dehydration via an enolate intermediate (By similarity)	E
	Core cluster	USDA205|WP_086018803.1 Sm2011|AGG73651.1 7653R|AID29032.2 MAFF303099|WP_010915104.1 USDA_110|WP_011087822.1 113_2|113-2GL004211	Digests double-stranded R-. Involved in the processing of primary rR- transcript to yield the immediate precursors to the large and small rR-s (23S and 16S). Also processes some mR-s, and tR-s when they are encoded in the rR- operon (By similarity)	K
	Core cluster	USDA205|WP_014329074.1 Sm2011|AGG74909.1 7653R|AID33119.1 MAFF303099|WP_010912145.1 USDA_110|WP_038966662.1 113_2|113-2GL000646	ATP-dependent D- helicase RecQ	L
	Core cluster	USDA205|WP_014327045.1 Sm2011|AGG72959.1 7653R|AID32495.1 MAFF303099|WP_010911486.1 USDA_110|WP_011083550.1 113_2|113-2GL000111	PTS IIA-like nitrogen-regulatory protein PtsN	G
	Core cluster	USDA_110|WP_011090322.1 113_2|113-2GL001545 USDA205|WP_060563732.1 Sm2011|AGG73123.1 7653R|AID31050.2 MAFF303099|WP_010910320.1	Antioxidant protein with alkyl hydroperoxidase activity. Required for the reduction of the AhpC active site cysteine residues and for the regeneration of the AhpC enzyme activity (By similarity)	S
	Core cluster	USDA205|WP_037394672.1 Sm2011|AGG75248.1 7653R|AID32714.1 MAFF303099|WP_010911740.1 USDA_110|WP_011084208.1 113_2|113-2GL008199	Cell division protein	D
	Core cluster	USDA205|WP_037391147.1 Sm2011|AGG73735.1 7653R|AID29125.1 MAFF303099|WP_010915185.1 USDA_110|WP_011086883.1 113_2|113-2GL005369	D- polymerase iii, chi subunit	L
	Core cluster	USDA205|WP_014328001.1 Sm2011|AGG73863.1 7653R|AID30767.1 MAFF303099|WP_010910093.1 USDA_110|WP_011087667.1 113_2|113-2GL004375	Protein of unknown function (DUF1467)	S
	Core cluster	USDA205|WP_153451727.1 Sm2011|AGG75834.1 7653R|AID33867.1 MAFF303099|WP_044548699.1 USDA_110|WP_011083474.1 113_2|113-2GL000191	UPF0314 protein	S
	Core cluster	USDA205|WP_037393639.1 Sm2011|AGG75344.1 7653R|AID33056.1 MAFF303099|WP_010912066.1 USDA_110|WP_011084350.1 113_2|113-2GL008043	transcriptional regulatory protein	K
	Core cluster	USDA205|WP_014328002.1 Sm2011|AGG73866.1 7653R|AID30766.1 MAFF303099|WP_010910092.1 USDA_110|WP_011087644.1 113_2|113-2GL004400	Catalyzes the attachment of proline to tR-(Pro) in a two-step reaction proline is first activated by ATP to form Pro- AMP and then transferred to the acceptor end of tR-(Pro) (By similarity)	J
	Core cluster	USDA205|WP_042777133.1 Sm2011|AGG74770.1 7653R|AID30985.2 MAFF303099|WP_010910258.1 USDA_110|WP_011089346.1 113_2|113-2GL002625	Involved in cell wall formation. Catalyzes the final step in the synthesis of UDP-N-acetylmuramoyl-pentapeptide, the precursor of murein (By similarity)	M
	Dispensable cluster	USDA205|WP_037393087.1 Sm2011|AGG71144.1 USDA205|WP_037399975.1 7653R|AID28384.2 USDA_110|WP_011086666.1 113_2|113-2GL005616	Catalyzes the -D(P)-dependent oxidation of 4- (phosphohydroxy)-L-threonine (HTP) into 2-amino-3-oxo-4- (phosphohydroxy)butyric acid which spontaneously decarboxylates to form 3-amino-2-oxopropyl phosphate (AHAP) (By similarity)	H
	Core cluster	USDA205|WP_037436855.1 Sm2011|AGG72641.1 7653R|AID34029.1 MAFF303099|WP_010913022.1 USDA_110|WP_011083386.1 113_2|113-2GL000304	cytochrome p450	Q
	Core cluster	USDA205|WP_037397997.1 Sm2011|AGG75578.1 7653R|AID30590.1 MAFF303099|WP_010909926.1 USDA_110|WP_011083168.1 113_2|113-2GL000543	Dehydrogenase	C
	Core cluster	USDA205|WP_012706673.1 Sm2011|AGG73026.1 7653R|QGU20618.1 MAFF303099|WP_008833937.1 USDA_110|WP_008542748.1 113_2|113-2GL001080	50S ribosomal protein L34	J
	Core cluster	USDA205|WP_037393860.1 Sm2011|AGG75665.1 7653R|AID33249.2 MAFF303099|WP_010912274.1 USDA_110|WP_011083396.1 113_2|113-2GL000275	Required for the formation of a threonylcarbamoyl group on adenosine at position 37 (t(6)A37) in tR-s that read codons beginning with adenine (By similarity)	O
	Core cluster	USDA205|WP_037430325.1 Sm2011|AGG70956.1 7653R|AID32422.1 MAFF303099|WP_010911437.1 USDA_110|WP_038965691.1 113_2|113-2GL002444	One of the components of the high-affinity ATP-driven potassium transport (or KDP) system, which catalyzes the hydrolysis of ATP coupled with the exchange of hydrogen and potassium ions (By similarity)	P
	Core cluster	USDA205|WP_014328194.1 Sm2011|AGG74075.1 7653R|AID30161.1 MAFF303099|WP_010909555.1 USDA_110|WP_011087628.1 113_2|113-2GL004421	Associates with the EF-Tu.GDP complex and induces the exchange of GDP to GTP. It remains bound to the aminoacyl-tR-.EF- Tu.GTP complex up to the GTP hydrolysis stage on the ribosome (By similarity)	J
	Core cluster	USDA205|WP_037391809.1 Sm2011|AGG73013.1 7653R|AID33713.1 MAFF303099|WP_010912751.1 USDA_110|WP_011090826.1 113_2|113-2GL001072	Tetrahydrodipicolinate N-succinyltransferase	E
	Core cluster	MAFF303099|WP_010910150.1 USDA205|WP_014327523.1 Sm2011|AGG73410.1 7653R|AID30869.2 USDA_110|WP_063921615.1 113_2|113-2GL005715	Transport of potassium into the cell (By similarity)	P
	Core cluster	USDA205|WP_014330348.1 Sm2011|AGG75921.1 7653R|AID33158.1 MAFF303099|WP_010912183.1 USDA_110|WP_011083410.1 113_2|113-2GL000261	bifunctional purine biosynthesis protein PurH	F
	Core cluster	USDA205|WP_014331421.1 Sm2011|AGG72364.1 7653R|AID31305.2 MAFF303099|WP_027047075.1 USDA_110|WP_011086986.1 113_2|113-2GL005249	Prevents the cell division inhibition by proteins MinC and MinD at internal division sites while permitting inhibition at polar sites. This ensures cell division at the proper site by restricting the formation of a division septum at the midpoint of the long axis of the cell (By similarity)	D
	Core cluster	USDA205|WP_081318971.1 Sm2011|AGG71812.1 7653R|AID31071.1 MAFF303099|WP_044550618.1 USDA_110|WP_162494094.1 113_2|113-2GL004920	penicillin-binding protein 1C	M
	Core cluster	USDA205|WP_014328405.1 Sm2011|AGG74319.1 7653R|AID29651.1 MAFF303099|WP_010909064.1 USDA_110|WP_011087111.1 113_2|113-2GL005105	fes assembly protein sufb	O
	Core cluster	USDA205|WP_060563220.1 Sm2011|AGG69960.1 7653R|AID32934.1 MAFF303099|WP_010911946.1 USDA_110|WP_011088033.1 113_2|113-2GL003977	gluconate 5-dehydrogenase	S
	Core cluster	USDA205|WP_014329892.1 Sm2011|AGG75517.1 7653R|AID30912.1 MAFF303099|WP_010910185.1 USDA_110|WP_011090882.1 113_2|113-2GL001012	Molybdate ABC transporter	P
	Core cluster	USDA205|WP_014327078.1 Sm2011|AGG72990.1 7653R|AID34318.2 MAFF303099|WP_010913315.1 USDA_110|WP_011083612.1 113_2|113-2GL000043	Transcriptional regulator	K
	Core cluster	USDA205|WP_014330413.1 Sm2011|AGG72626.1 7653R|AID33943.2 MAFF303099|WP_010912943.1 USDA_110|WP_011090863.1 113_2|113-2GL001034	Phosphoenolpyruvate Carboxylase	C
	Core cluster	USDA205|WP_014327331.1 Sm2011|AGG73234.1 7653R|AID32237.1 MAFF303099|WP_010911268.1 USDA_110|WP_028175216.1 113_2|113-2GL002333	flagellar motor protein MotA	N
	Core cluster	USDA205|WP_037396977.1 Sm2011|AGG74774.1 7653R|AID30990.1 MAFF303099|WP_010910262.1 USDA_110|WP_038966431.1 113_2|113-2GL002621	Specifically methylates the N4 position of cytidine in position 1402 (C1402) of 16S rR- (By similarity)	M
	Core cluster	USDA205|WP_014330037.1 Sm2011|AGG75623.1 7653R|AID33128.1 MAFF303099|WP_010912154.1 USDA_110|WP_011083274.1 113_2|113-2GL000429	Produces ATP from ADP in the presence of a proton gradient across the membrane. The alpha chain is a regulatory subunit (By similarity)	C
	Core cluster	USDA205|WP_037400555.1 Sm2011|AGG72800.1 7653R|AID30627.2 MAFF303099|WP_010909959.1 USDA_110|WP_011090122.1 113_2|113-2GL001772	auxin efflux carrier	S
	Core cluster	USDA205|WP_014329916.1 Sm2011|AGG75536.1 7653R|AID31978.2 MAFF303099|WP_010911027.1 USDA_110|WP_011089709.1 113_2|113-2GL002245	Type I secretion membrane fusion protein (HlyD	U
	Core cluster	USDA205|WP_037391803.1 Sm2011|AGG73006.1 7653R|AID28698.2 USDA_110|WP_011086650.1 113_2|113-2GL005632 MAFF303099|WP_032929321.1	acriflavin resistance protein	P
	Core cluster	USDA205|WP_037402683.1 Sm2011|AGG72514.1 7653R|AID29303.2 MAFF303099|WP_044550106.1 USDA_110|WP_038965913.1 113_2|113-2GL007052	R- polymerase sigma factor	K
	Dispensable cluster	USDA205|WP_060563572.1 7653R|AID28722.1 MAFF303099|WP_010914811.1 USDA_110|WP_028174443.1 113_2|113-2GL003087 7653R|AID32440.1	Uncharacterised ACR, COG2135	S
	Core cluster	USDA205|WP_014327554.1 Sm2011|AGG73440.1 7653R|AID32066.1 MAFF303099|WP_010911103.1 USDA_110|WP_038967656.1 113_2|113-2GL002496	AraC family transcriptional regulator	K
	Core cluster	USDA205|WP_014328322.1 Sm2011|AGG74252.1 7653R|AID30040.1 MAFF303099|WP_010909432.1 USDA_110|WP_011088898.1 113_2|113-2GL003031	ABC transporter permease protein	S
	Core cluster	USDA205|WP_014329210.1 Sm2011|AGG72188.1 7653R|AID30224.1 MAFF303099|WP_010909607.1 USDA_110|WP_011088359.1 113_2|113-2GL003614	Pfam:DUF403	S
	Core cluster	USDA205|WP_037434410.1 Sm2011|AGG71878.1 7653R|AID33532.1 MAFF303099|WP_010912557.1 USDA_110|WP_011088394.1 113_2|113-2GL003575	ABC transporter	V
	Core cluster	USDA205|WP_060563605.1 Sm2011|AGG75924.1 7653R|AID33154.1 MAFF303099|WP_010912180.1 USDA_110|WP_011085237.1 113_2|113-2GL007176	Protease HtpX homolog	O
	Core cluster	USDA205|WP_037396612.1 Sm2011|AGG74419.1 7653R|QGU20801.1 MAFF303099|WP_010909670.1 USDA_110|WP_011088636.1 113_2|113-2GL003310	mandelate racemase muconate lactonizing	M
	Core cluster	USDA205|WP_037401206.1 Sm2011|AGG73344.1 7653R|AID28341.1 MAFF303099|WP_010914439.1 USDA_110|WP_011083599.1 113_2|113-2GL000056	transcriptional Regulator, LysR family	K
	Core cluster	USDA205|WP_014328202.1 Sm2011|AGG74084.1 USDA_110|WP_011087617.1 113_2|113-2GL004433 7653R|AID30149.1 MAFF303099|WP_032930325.1	involved in the biosynthesis of lipid A, a phosphorylated glycolipid that anchors the lipopolysaccharide to the outer membrane of the cell (By similarity)	M
	Core cluster	USDA205|WP_037428621.1 Sm2011|AGG72366.1 7653R|AID31307.1 MAFF303099|WP_032931017.1 USDA_110|WP_011086984.1 113_2|113-2GL005251	Cell division inhibitor that blocks the formation of polar Z ring septums. Rapidly oscillates between the poles of the cell to destabilize FtsZ filaments that have formed before they mature into polar Z rings. Prevents FtsZ polymerization (By similarity)	D
	Core cluster	USDA205|WP_060563397.1 Sm2011|AGG74941.1 7653R|AID34160.2 MAFF303099|WP_010913147.1 USDA_110|WP_011088098.1 113_2|113-2GL003912	Inherit from proNOG: pep phosphonomutase	G
	Core cluster	USDA205|WP_003531676.1 Sm2011|AGG73722.1 7653R|AID29111.1 MAFF303099|WP_006203723.1 USDA_110|WP_008130699.1 113_2|113-2GL005395	Carrier of the growing fatty acid chain in fatty acid biosynthesis (By similarity)	I
	Core cluster	USDA205|WP_037400601.1 USDA_110|WP_011086085.1 113_2|113-2GL006221 Sm2011|AGG75456.1 7653R|AID34001.2 MAFF303099|WP_080511907.1	Transcriptional regulator, LacI family	K
	Core cluster	USDA205|WP_037399580.1 Sm2011|AGG73368.1 7653R|AID28328.1 MAFF303099|WP_010914431.1 USDA_110|WP_011090256.1 113_2|113-2GL001621	ATP phosphoribosyltransferase, regulatory subunit	E
	Core cluster	USDA205|WP_014329909.1 Sm2011|AGG75531.1 7653R|AID29441.1 MAFF303099|WP_010915517.1 USDA_110|WP_011083171.1 113_2|113-2GL000540	4-hydroxyphenylpyruvate dioxygenase	Q
	Core cluster	USDA205|WP_037435716.1 Sm2011|AGG74527.1 7653R|AID30632.1 MAFF303099|WP_010909965.1 USDA_110|WP_011086590.1 113_2|113-2GL005708	3-Oxoacyl-(Acyl carrier protein) synthase	I
	Core cluster	USDA205|WP_153451999.1 Sm2011|AGG75394.1 7653R|AID32334.1 MAFF303099|WP_010911352.1 USDA_110|WP_011090477.1 113_2|113-2GL001361	Catalyzes the ferrous insertion into protoporphyrin IX (By similarity)	H
	Core cluster	USDA205|WP_037397773.1 Sm2011|AGG72064.1 7653R|AID31980.1 MAFF303099|WP_010911029.1 USDA_110|WP_011084182.1 113_2|113-2GL008227	glycoside hydrolase family protein	G
	Core cluster	USDA205|WP_086018591.1 Sm2011|AGG73412.1 7653R|AID28738.1 MAFF303099|WP_010914825.1 USDA_110|WP_028173698.1 113_2|113-2GL008431	atp synthase	S
	Core cluster	USDA205|WP_014328180.1 Sm2011|AGG74061.1 7653R|AID29776.2 MAFF303099|WP_044550352.1 USDA_110|WP_038967757.1 113_2|113-2GL003642	Alpha Beta Hydrolase Fold protein	S
	Core cluster	USDA205|WP_037402821.1 Sm2011|AGG74710.1 7653R|AID30894.1 MAFF303099|WP_010910176.1 USDA_110|WP_011089246.1 113_2|113-2GL002738	protease	O
	Core cluster	USDA205|WP_014329136.1 Sm2011|AGG74954.1 7653R|AID32102.2 MAFF303099|WP_010911136.1 USDA_110|WP_011085256.1 113_2|113-2GL007153	polyA polymerase	J
	Core cluster	USDA205|WP_037399477.1 Sm2011|AGG73879.1 7653R|AID30331.1 MAFF303099|WP_010909699.1 USDA_110|WP_011087872.1 113_2|113-2GL004159	3'-5' exoribonuclease that releases 5'-nucleoside monophosphates and is involved in maturation of structured R-s (By similarity)	K
	Core cluster	USDA205|WP_037394627.1 Sm2011|AGG75274.1 7653R|AID32755.1 MAFF303099|WP_010911785.1 USDA_110|WP_011083023.1 113_2|113-2GL000697	Component of the acetyl coenzyme A carboxylase (ACC) complex. First, biotin carboxylase catalyzes the carboxylation of biotin on its carrier protein (BCCP) and then the CO(2) group is transferred by the carboxyltransferase to acetyl-CoA to form malonyl-CoA (By similarity)	I
	Dispensable cluster	USDA205|WP_060563730.1 Sm2011|AGG72164.1 MAFF303099|WP_010909804.1 USDA_110|WP_011087137.1 113_2|113-2GL005075 Sm2011|AGG72418.1	Cupin 2, conserved barrel domain protein	S
	Core cluster	USDA205|WP_037396990.1 Sm2011|AGG74789.1 7653R|AID31009.2 MAFF303099|WP_010910280.1 USDA_110|WP_028173518.1 113_2|113-2GL008165	Methylenetetrahydrofolate reductase	E
	Core cluster	USDA205|WP_037401017.1 Sm2011|AGG74745.1 7653R|AID30967.1 MAFF303099|WP_010910237.1 USDA_110|WP_011089328.1 113_2|113-2GL002647	Methylates ribosomal protein L11 (By similarity)	J
	Core cluster	USDA205|WP_037433179.1 Sm2011|AGG70709.1 7653R|AID28099.2 MAFF303099|WP_010914530.1 USDA_110|WP_011089310.1 113_2|113-2GL002666	Tartrate dehydrogenase	C
	Core cluster	USDA205|WP_014328209.1 Sm2011|AGG74092.1 7653R|AID30562.1 MAFF303099|WP_010909910.1 USDA_110|WP_038967576.1 113_2|113-2GL004884	o-methyltransferase	O
	Core cluster	USDA205|WP_153452010.1 Sm2011|AGG73882.1 7653R|AID30193.1 MAFF303099|WP_010909584.1 USDA_110|WP_011087861.1 113_2|113-2GL004171	Catalyzes the transfer of an acyl group from acyl- phosphate (acyl-PO(4)) to glycerol-3-phosphate (G3P) to form lysophosphatidic acid (LPA). This enzyme utilizes acyl-phosphate as fatty acyl donor, but not acyl-CoA or acyl-ACP (By similarity)	S
	Core cluster	USDA205|WP_037391100.1 Sm2011|AGG73776.1 USDA_110|WP_011089431.1 113_2|113-2GL002536 7653R|AID30064.1 MAFF303099|WP_010909458.1	Rhodanese domain protein	P
	Core cluster	USDA205|WP_037393655.1 Sm2011|AGG75333.1 7653R|AID33022.1 MAFF303099|WP_010912029.1 USDA_110|WP_011089890.1 113_2|113-2GL002041	mota tolq exbb proton channel	U
	Core cluster	USDA205|WP_037398157.1 Sm2011|AGG72617.1 7653R|AID33934.2 MAFF303099|WP_010912934.1 USDA_110|WP_011083577.1 113_2|113-2GL000079	Nucleotidyl transferase	M
	Core cluster	USDA205|WP_037398820.1 Sm2011|AGG72518.1 7653R|AID29318.1 MAFF303099|WP_010915410.1 USDA_110|WP_038967373.1 113_2|113-2GL007242	DoxX family	S
	Core cluster	USDA205|WP_014327765.1 Sm2011|AGG73640.1 7653R|AID29019.1 MAFF303099|WP_006202221.1 USDA_110|WP_011087830.1 113_2|113-2GL004201	Binds specifically to the SsrA R- (tmR-) and is required for stable association of SsrA with ribosomes (By similarity)	O
	Core cluster	USDA205|WP_037428333.1 Sm2011|AGG72499.1 7653R|AID28552.1 MAFF303099|WP_010914668.1 USDA_110|WP_011085121.1 113_2|113-2GL007315	Protocatechuate 3,4-dioxygenase, beta	Q
	Core cluster	USDA205|WP_014327379.1 Sm2011|AGG73283.1 7653R|AID28033.2 MAFF303099|WP_010914108.1 USDA_110|WP_028174545.1 113_2|113-2GL002462	6-phosphogluconolactonase EC 3.1.1.31	G
	Core cluster	USDA205|WP_037436826.1 Sm2011|AGG74453.1 7653R|AID31829.2 MAFF303099|WP_010910902.1 USDA_110|WP_011083352.1 113_2|113-2GL000343	Ompa motb domain protein	M
	Core cluster	USDA205|WP_037398729.1 Sm2011|AGG72817.1 7653R|AID34323.1 MAFF303099|WP_010913320.1 USDA_110|WP_011083607.1 113_2|113-2GL000048	Transcription elongation factor NusA	K
	Core cluster	USDA205|WP_037393711.1 Sm2011|AGG75635.1 7653R|AID33302.1 MAFF303099|WP_010912327.1 USDA_110|WP_011083281.1 113_2|113-2GL000421	Dihydrolipoyl dehydrogenase	C
	Dispensable cluster	USDA205|WP_060563251.1 7653R|QGU21078.1 MAFF303099|WP_010916031.1 USDA_110|WP_011084892.1 113_2|113-2GL007593 MAFF303099|WP_010913546.1	8-Amino-7-oxononanoate synthase	H
	Core cluster	USDA205|WP_014764094.1 Sm2011|AGG73925.1 7653R|AID29885.1 MAFF303099|WP_010909264.1 USDA_110|WP_011088161.1 113_2|113-2GL003840	50S ribosomal protein L10	J
	Core cluster	USDA205|WP_037401745.1 Sm2011|AGG73964.1 7653R|AID29925.1 MAFF303099|WP_010909291.1 USDA_110|WP_011088123.1 113_2|113-2GL003886	recombination factor protein RarA	L
	Core cluster	USDA205|WP_037431993.1 Sm2011|AGG71714.1 7653R|AID29004.1 MAFF303099|WP_010915080.1 USDA_110|WP_038967131.1 113_2|113-2GL004942	Isovaleryl-CoA dehydrogenase	I
	Core cluster	USDA205|WP_037396047.1 Sm2011|AGG72142.1 7653R|AID32810.1 MAFF303099|WP_010911833.1 USDA_110|WP_011084304.1 113_2|113-2GL008091	Dehydrogenase	C
	Core cluster	USDA205|WP_037428624.1 Sm2011|AGG72356.1 7653R|AID28201.1 MAFF303099|WP_010914286.1 USDA_110|WP_011090207.1 113_2|113-2GL001673	R- cap guanine-N2 methyltransferase	J
	Core cluster	USDA205|WP_014328117.1 Sm2011|AGG73997.1 7653R|AID30470.1 MAFF303099|WP_044550518.1 USDA_110|WP_028175852.1 113_2|113-2GL003686	K07001 NTE family protein	M
	Core cluster	USDA205|WP_014329845.1 Sm2011|AGG75473.1 7653R|AID32315.1 MAFF303099|WP_032931553.1 USDA_110|WP_038966878.1 113_2|113-2GL005566	Aldolase	G
	Core cluster	USDA205|WP_012707398.1 Sm2011|AGG73642.1 7653R|AID29024.1 MAFF303099|WP_010915096.1 USDA_110|WP_011087827.1 113_2|113-2GL004204	Pfam:DUF88	S
	Core cluster	USDA205|WP_014330104.1 Sm2011|AGG75772.1 7653R|AID33401.2 MAFF303099|WP_032932314.1 USDA_110|WP_038965074.1 113_2|113-2GL000372	Possibl zinc metallo-peptidase	S
	Core cluster	USDA205|WP_042775664.1 Sm2011|AGG75467.1 7653R|AID32304.1 MAFF303099|WP_010911325.1 USDA_110|WP_011090479.1 113_2|113-2GL001359	High-affinity nickel-transporter	P
	Core cluster	USDA205|WP_037401020.1 Sm2011|AGG74716.1 7653R|AID30915.1 MAFF303099|WP_010910188.1 USDA_110|WP_011089252.1 113_2|113-2GL002732	Provides the sole de novo source of dTMP for D- biosynthesis (By similarity)	F
	Core cluster	USDA205|WP_012710027.1 Sm2011|AGG72811.1 7653R|AID34288.1 MAFF303099|WP_010913283.1 USDA_110|WP_011090837.1 113_2|113-2GL001061	Binds to D- and alters its conformation. May be involved in regulation of gene expression, nucleoid organization and D- protection (By similarity)	S
	Core cluster	USDA205|WP_037397770.1 Sm2011|AGG72065.1 7653R|AID31565.2 USDA_110|WP_011085384.1 113_2|113-2GL006971 MAFF303099|WP_010916189.1	PAS	T
	Core cluster	USDA205|WP_037394059.1 Sm2011|AGG75507.1 7653R|AID30798.1 MAFF303099|WP_010910124.1 USDA_110|WP_011086055.1 113_2|113-2GL006251	precorrin-4 C(11)-methyltransferase	H
	Core cluster	USDA205|WP_037393614.1 Sm2011|AGG75358.1 7653R|AID32902.1 MAFF303099|WP_044550977.1 USDA_110|WP_011084336.1 113_2|113-2GL008060	fructose-bisphosphate aldolase	G
	Core cluster	USDA205|WP_037401272.1 Sm2011|AGG69701.1 7653R|AID28790.1 MAFF303099|WP_010914875.1 USDA_110|WP_011089416.1 113_2|113-2GL002553	Uncharacterized conserved protein (DUF2277)	S
	Core cluster	USDA205|WP_037396931.1 Sm2011|AGG74754.1 7653R|AID30973.1 MAFF303099|WP_010910243.1 USDA_110|WP_038966438.1 113_2|113-2GL002643	D- ligase that catalyzes the formation of phosphodiester linkages between 5'-phosphoryl and 3'-hydroxyl groups in double-stranded D- using -D as a coenzyme and as the energy source for the reaction. It is essential for D- replication and repair of damaged D- (By similarity)	L
	Core cluster	USDA205|WP_060563298.1 Sm2011|AGG75521.1 7653R|AID33436.1 MAFF303099|WP_010912465.1 USDA_110|WP_011089071.1 113_2|113-2GL002843	Dehydrogenase	C
	Core cluster	USDA205|WP_037401529.1 Sm2011|AGG73894.1 7653R|AID29794.2 MAFF303099|WP_010909198.1 USDA_110|WP_011087847.1 113_2|113-2GL004187	Allows the formation of correctly charged Asn-tR-(Asn) or Gln-tR-(Gln) through the transamidation of misacylated Asp- tR-(Asn) or Glu-tR-(Gln) in organisms which lack either or both of asparaginyl-tR- or glutaminyl-tR- synthetases. The reaction takes place in the presence of glutamine and ATP through an activated phospho-Asp-tR-(Asn) or phospho-Glu-tR-(Gln) (By similarity)	J
	Core cluster	USDA205|WP_037394095.1 Sm2011|AGG75528.1 7653R|AID29436.1 MAFF303099|WP_044551694.1 USDA_110|WP_038967448.1 113_2|113-2GL000536	Homogentisate 12-dioxygenase	Q
	Core cluster	USDA205|WP_153451539.1 Sm2011|AGG74305.1 7653R|AID30471.2 MAFF303099|WP_044550521.1 USDA_110|WP_038967117.1 113_2|113-2GL005063	Single-stranded-D--specific exonuclease (RecJ)	L
	Core cluster	USDA205|WP_014328713.1 Sm2011|AGG74550.1 7653R|AID30652.1 MAFF303099|WP_010909984.1 USDA_110|WP_011086043.1 113_2|113-2GL006263	Catalyzes amidations at positions B, D, E, and G on adenosylcobyrinic A,C-diamide. NH(2) groups are provided by glutamine, and one molecule of ATP is hydrogenolyzed for each amidation (By similarity)	H
	Core cluster	USDA205|WP_037392966.1 Sm2011|AGG74326.1 7653R|AID29641.2 MAFF303099|WP_010909054.1 USDA_110|WP_011087097.1 113_2|113-2GL005122	alkyl hydroperoxide reductase Thiol specific antioxidant Mal allergen	O
	Core cluster	USDA205|WP_014327085.1 Sm2011|AGG72997.1 7653R|AID32489.2 MAFF303099|WP_010911480.1 USDA_110|WP_011085616.1 113_2|113-2GL006709	Ribokinase	G
	Core cluster	USDA205|WP_014328205.1 Sm2011|AGG74088.1 7653R|AID30146.1 MAFF303099|WP_019858188.1 USDA_110|WP_011087607.1 113_2|113-2GL004443	citrate synthase	C
	Dispensable cluster	USDA205|WP_014327512.1 Sm2011|AGG73399.1 MAFF303099|WP_157865874.1 USDA_110|WP_063921576.1 7653R|AID32853.1 MAFF303099|WP_010911875.1	PRC-barrel domain protein	S
	Core cluster	USDA205|WP_014327536.1 Sm2011|AGG73424.1 7653R|AID28754.1 MAFF303099|WP_010914838.1 USDA_110|WP_011085318.1 113_2|113-2GL007081	synthase	H
	Core cluster	USDA205|WP_060563614.1 Sm2011|AGG72856.1 7653R|AID29405.1 MAFF303099|WP_010915482.1 USDA_110|WP_011087159.1 113_2|113-2GL005052	lysyL-tR- synthetase	J
	Core cluster	USDA205|WP_014328128.1 Sm2011|AGG74007.1 7653R|AID30389.1 MAFF303099|WP_010909751.1 USDA_110|WP_028175067.1 113_2|113-2GL007203	flavin reductase domain protein fmn-binding	S
	Core cluster	USDA205|WP_014327853.1 Sm2011|AGG73749.1 7653R|AID29159.1 MAFF303099|WP_010915215.1 USDA_110|WP_011090206.1 113_2|113-2GL001674	molybdopterin converting factor subunit 2	H
	Core cluster	USDA205|WP_014330708.1 Sm2011|AGG72857.1 7653R|AID29406.1 MAFF303099|WP_032921042.1 USDA_110|WP_011087158.1 113_2|113-2GL005053	Involved in peptide bond synthesis. Stimulates efficient translation and peptide-bond synthesis on native or reconstituted 70S ribosomes in vitro. Probably functions indirectly by altering the affinity of the ribosome for aminoacyl-tR-, thus increasing their reactivity as acceptors for peptidyl transferase (By similarity)	J
	Core cluster	USDA205|WP_037428494.1 Sm2011|AGG72439.1 7653R|AID29193.2 MAFF303099|WP_010915242.1 USDA_110|WP_011088619.1 113_2|113-2GL003328	Histidine kinase	T
	Core cluster	USDA205|WP_014327569.1 Sm2011|AGG73457.1 7653R|AID28796.1 MAFF303099|WP_010914880.1 USDA_110|WP_038965884.1 113_2|113-2GL006913	hemolysin A	J
	Core cluster	USDA205|WP_037432054.1 Sm2011|AGG72423.1 7653R|AID34179.1 MAFF303099|WP_010913165.1 USDA_110|WP_011083255.1 113_2|113-2GL000448	of the drug metabolite transporter (DMT) superfamily	E, G
	Core cluster	USDA205|WP_080577301.1 Sm2011|AGG74340.1 7653R|AID29702.1 MAFF303099|WP_010909113.1 USDA_110|WP_011088424.1 113_2|113-2GL003544	peptidase S58, DmpA	E, Q
	Core cluster	USDA205|WP_037391015.1 Sm2011|AGG73820.1 7653R|AID29582.1 MAFF303099|WP_010915630.1 USDA_110|WP_011087732.1 113_2|113-2GL004300	Protein of unknown function (DUF2842)	S
	Core cluster	USDA205|WP_037394750.1 Sm2011|AGG75210.1 7653R|AID32655.1 MAFF303099|WP_010911683.1 USDA_110|WP_011083042.1 113_2|113-2GL000679	Glutaredoxin	O
	Core cluster	USDA205|WP_014330799.1 Sm2011|AGG72926.1 7653R|AID34172.1 MAFF303099|WP_010913158.1 USDA_110|WP_011086821.1 113_2|113-2GL005438	Increases the formation of ribosomal termination complexes and stimulates activities of RF-1 and RF-2. It binds guanine nucleotides and has strong preference for UGA stop codons. It may interact directly with the ribosome. The stimulation of RF- 1 and RF-2 is significantly reduced by GTP and GDP, but not by GMP (By similarity)	J
	Core cluster	USDA205|WP_060563238.1 Sm2011|AGG74944.1 7653R|AID28199.1 MAFF303099|WP_010914205.1 USDA_110|WP_038967230.1 113_2|113-2GL004503	Transcriptional regulator	K
	Core cluster	USDA205|WP_037399543.1 Sm2011|AGG73379.1 7653R|AID29398.1 MAFF303099|WP_010915474.1 USDA_110|WP_011090228.1 113_2|113-2GL001649	deaminase	F, J
	Core cluster	USDA205|WP_037397473.1 Sm2011|AGG72930.1 7653R|AID33725.1 MAFF303099|WP_010912763.1 USDA_110|WP_011087706.1 113_2|113-2GL004332	Glutathione-dependent formaldehyde-activating	S
	Core cluster	USDA205|WP_014330665.1 Sm2011|AGG72821.1 7653R|AID34327.1 MAFF303099|WP_010913324.1 USDA_110|WP_028172518.1 113_2|113-2GL000052	Responsible for synthesis of pseudouridine from uracil- 55 in the psi GC loop of transfer R-s (By similarity)	J
	Core cluster	USDA205|WP_037435919.1 Sm2011|AGG70772.1 7653R|AID31869.2 MAFF303099|WP_162034353.1 USDA_110|WP_038965185.1 113_2|113-2GL008746	esterase, PHB depolymerase	Q
	Core cluster	USDA205|WP_014330113.1 Sm2011|AGG75677.1 7653R|AID33167.1 MAFF303099|WP_010912191.1 USDA_110|WP_011083371.1 113_2|113-2GL000320	gtp-binding protein typa	T
	Core cluster	USDA205|WP_037392253.1 Sm2011|AGG72382.1 7653R|AID32312.1 MAFF303099|WP_010911332.1 USDA_110|WP_011088364.1 113_2|113-2GL003609	Short-chain dehydrogenase reductase SDR	S
	Core cluster	USDA205|WP_037391272.1 Sm2011|AGG73598.1 7653R|AID28975.1 MAFF303099|WP_010915049.1 USDA_110|WP_011085911.1 113_2|113-2GL006401	cytochrome c-type biogenesis protein	O
	Core cluster	USDA205|WP_014327204.1 Sm2011|AGG73100.1 7653R|AID27894.1 MAFF303099|WP_010913396.1 USDA_110|WP_028172741.1 113_2|113-2GL008525	ApaG protein	P
	Core cluster	USDA205|WP_037433155.1 Sm2011|AGG70706.1 7653R|AID28102.1 MAFF303099|WP_010914533.1 USDA_110|WP_011089449.1 113_2|113-2GL002517	2-hydroxyacid dehydrogenase	C
	Core cluster	USDA205|WP_037394653.1 Sm2011|AGG75258.1 7653R|AID32736.1 MAFF303099|WP_010911763.1 USDA_110|WP_011083056.1 113_2|113-2GL000664	permease of the drug metabolite transporter	E, G
	Core cluster	USDA205|WP_037401005.1 Sm2011|AGG74733.1 7653R|AID30945.1 MAFF303099|WP_044548007.1 USDA_110|WP_063921530.1 113_2|113-2GL002677	D- helicase	L
	Dispensable cluster	USDA205|WP_014328797.1 Sm2011|AGG73637.1 USDA205|WP_037395374.1 Sm2011|AGG74571.1 MAFF303099|WP_010910139.1 7653R|AID30852.2	BA14K-like protein	S
	Core cluster	USDA205|WP_037435225.1 Sm2011|AGG75342.1 7653R|AID33032.2 MAFF303099|WP_010912038.1 USDA_110|WP_011084351.1 113_2|113-2GL008042	Nuclease that resolves Holliday junction intermediates in genetic recombination. Cleaves the cruciform structure in supercoiled D- by nicking to strands with the same polarity at sites symmetrically opposed at the junction in the homologous arms and leaves a 5'-terminal phosphate and a 3'-terminal hydroxyl group (By similarity)	L
	Core cluster	USDA205|WP_014329852.1 Sm2011|AGG75477.1 7653R|AID33653.1 MAFF303099|WP_010912712.1 USDA_110|WP_063921647.1 113_2|113-2GL002313	lipoprotein	P
	Core cluster	USDA205|WP_153451571.1 Sm2011|AGG75708.1 MAFF303099|WP_044549195.1 USDA_110|WP_011089551.1 113_2|113-2GL002404 7653R|AID31430.1	Dehydrogenase	C
	Core cluster	USDA205|WP_080577443.1 Sm2011|AGG75229.1 7653R|AID32678.1 MAFF303099|WP_010911704.1 USDA_110|WP_011084190.1 113_2|113-2GL008219	synthetase	J
	Core cluster	USDA205|WP_014327567.1 Sm2011|AGG73454.1 7653R|AID28776.1 MAFF303099|WP_044551531.1 USDA_110|WP_011090678.1 113_2|113-2GL001132	enoyl-CoA hydratase	I
	Core cluster	USDA205|WP_037393976.1 Sm2011|AGG75827.1 7653R|AID33334.1 MAFF303099|WP_032932270.1 USDA_110|WP_011083296.1 113_2|113-2GL000403	Protein of unknown function (DUF1223)	S
	Core cluster	USDA205|WP_037397315.1 Sm2011|AGG72883.1 7653R|AID30858.2 MAFF303099|WP_044547964.1 USDA_110|WP_011087105.1 113_2|113-2GL005112	Glutathione S-Transferase	O
	Core cluster	USDA205|WP_037428371.1 Sm2011|AGG72468.1 7653R|AID32575.1 MAFF303099|WP_010911604.1 USDA_110|WP_038965301.1 113_2|113-2GL008390	phosphonate C-P lyase system protein PhnL	P
	Core cluster	USDA205|WP_014329067.1 Sm2011|AGG74903.1 7653R|AID32031.1 MAFF303099|WP_010911074.1 USDA_110|WP_038966868.1 113_2|113-2GL005593	Protein of unknown function (DUF1428)	S
	Core cluster	USDA205|WP_014330423.1 Sm2011|AGG72636.1 7653R|AID33870.1 MAFF303099|WP_010912875.1 USDA_110|WP_011083477.1 113_2|113-2GL000188	imidazoleglycerol-phosphate dehydratase	E
	Core cluster	USDA205|WP_037393540.1 Sm2011|AGG75395.1 7653R|AID32336.1 MAFF303099|WP_010911354.1 USDA_110|WP_011090475.1 113_2|113-2GL001363	SPFH domain, Band 7 family protein	O
	Core cluster	USDA205|WP_037392589.1 Sm2011|AGG73496.1 7653R|AID28822.1 MAFF303099|WP_032929377.1 USDA_110|WP_028173457.1 113_2|113-2GL008077	Diguanylate cyclase phosphodiesterase	T
	Core cluster	USDA205|WP_014327290.1 Sm2011|AGG73193.1 7653R|AID27976.1 MAFF303099|WP_006200926.1 USDA_110|WP_011084263.1 113_2|113-2GL008135	however, it seems to stimulate more or less all the activities of the other two initiation factors, IF-2 and IF-3 (By similarity)	J
	Core cluster	USDA205|WP_037393009.1 Sm2011|AGG74316.1 7653R|AID29654.2 MAFF303099|WP_010909068.1 USDA_110|WP_011087114.1 113_2|113-2GL005102	Cysteine desulfurase	E
	Core cluster	USDA205|WP_037399514.1 Sm2011|AGG73389.1 7653R|AID29412.1 MAFF303099|WP_010915488.1 USDA_110|WP_038967310.1 113_2|113-2GL001630	3-Deoxy-D-manno-octulosonic-acid transferase	M
	Core cluster	USDA205|WP_037395563.1 Sm2011|AGG71479.1 7653R|AID28447.1 MAFF303099|WP_010914577.1 USDA_110|WP_011085804.1 113_2|113-2GL006514	Can catalyze the oxidation of choline to betaine aldehyde and betaine aldehyde to glycine betaine (By similarity)	E
	Core cluster	USDA205|WP_153451724.1 Sm2011|AGG75828.1 7653R|AID33332.1 MAFF303099|WP_010912359.1 USDA_110|WP_011083297.1 113_2|113-2GL000402	Aconitate hydratase	C
	Core cluster	USDA205|WP_153451698.1 Sm2011|AGG73493.1 7653R|AID28819.1 MAFF303099|WP_010914902.1 USDA_110|WP_011084135.1 113_2|113-2GL008283	Redoxin domain protein	O
	Core cluster	USDA205|WP_014328189.1 Sm2011|AGG74070.1 7653R|AID30168.1 MAFF303099|WP_010909562.1 USDA_110|WP_011087892.1 113_2|113-2GL004137	Protein of unknown function, DUF482	S
	Core cluster	USDA205|WP_080577439.1 Sm2011|AGG75268.1 7653R|AID32751.2 MAFF303099|WP_010911781.1 USDA_110|WP_011083019.1 113_2|113-2GL000701	3-dehydroquinate synthase	E
	Core cluster	USDA205|WP_080580041.1 Sm2011|AGG72851.1 7653R|AID30888.1 MAFF303099|WP_010910170.1 USDA_110|WP_063921603.1 113_2|113-2GL008509	transcriptional regulator	K
	Core cluster	USDA205|WP_014330350.1 Sm2011|AGG75923.1 7653R|AID33155.2 MAFF303099|WP_010912181.1 USDA_110|WP_011083408.1 113_2|113-2GL000263	Ribosomal R- small subunit methyltransferase B	J
	Core cluster	USDA205|WP_015633486.1 Sm2011|AGG70155.1 7653R|QGU21230.1 MAFF303099|WP_010913822.1 USDA_110|WP_011084827.1 113_2|113-2GL007649	Part of the ABC transporter complex NodIJ involved in the export of the nodulation factors (Nod factors), the bacterial signal molecules that induce symbiosis and subsequent nodulation induction. Nod factors are LCO (lipo-chitin oligosaccharide), a modified beta-1,4-linked N-acetylglucosamine oligosaccharide. This subunit is responsible for energy coupling to the transport system (By similarity)	H
	Core cluster	USDA205|WP_014328526.1 Sm2011|AGG74416.1 7653R|AID30299.1 MAFF303099|WP_010909667.1 USDA_110|WP_011088633.1 113_2|113-2GL003313	Mammalian cell entry related domain protein	Q
	Core cluster	USDA205|WP_012710040.1 Sm2011|AGG72823.1 7653R|AID34329.1 MAFF303099|WP_010913326.1 USDA_110|WP_011083602.1 113_2|113-2GL000053	One of the primary rR- binding proteins, it binds directly to 16S rR- where it helps nucleate assembly of the platform of the 30S subunit by binding and bridging several R- helices of the 16S rR- (By similarity)	J
	Core cluster	USDA205|WP_037395241.1 Sm2011|AGG73301.1 7653R|QGU20956.1 MAFF303099|WP_010914125.1 USDA_110|WP_038965409.1 113_2|113-2GL001763	PAS PAC sensor Signal transduction histidine kinase	T
	Core cluster	USDA205|WP_014327818.1 Sm2011|AGG73705.1 7653R|AID29093.1 MAFF303099|WP_010915159.1 USDA_110|WP_011086838.1 113_2|113-2GL005421	May play a role in the repair of endogenous alkylation damage (By similarity)	O
	Core cluster	USDA205|WP_037401512.1 Sm2011|AGG73899.1 7653R|AID29805.1 MAFF303099|WP_010909208.1 USDA_110|WP_011087063.1 113_2|113-2GL005160	acetyl-CoA carboxylase, biotin carboxylase	I
	Core cluster	USDA205|WP_153451975.1 Sm2011|AGG72722.1 7653R|AID27850.1 MAFF303099|WP_044548881.1 USDA_110|WP_028173504.1 113_2|113-2GL008143	Type II and III secretion system protein	U
	Core cluster	USDA205|WP_037392711.1 Sm2011|AGG73426.1 7653R|AID28752.1 MAFF303099|WP_044549722.1 USDA_110|WP_011085320.1 113_2|113-2GL007080	methyltransferase small	S
	Core cluster	USDA205|WP_012707758.1 Sm2011|AGG73940.1 7653R|AID29902.1 MAFF303099|WP_010909277.1 USDA_110|WP_011088147.1 113_2|113-2GL003857	The globular domain of the protein is located near the polypeptide exit tunnel on the outside of the subunit, while an extended beta-hairpin is found that lines the wall of the exit tunnel in the center of the 70S ribosome (By similarity)	J
	Core cluster	USDA205|WP_060563412.1 Sm2011|AGG74768.1 7653R|AID30983.1 MAFF303099|WP_010910256.1 USDA_110|WP_011089344.1 113_2|113-2GL002627	Cell wall formation. Catalyzes the addition of glutamate to the nucleotide precursor UDP-N-acetylmuramoyl-L-alanine (UMA) (By similarity)	M
	Core cluster	USDA205|WP_037395276.1 Sm2011|AGG73272.1 7653R|AID28023.1 MAFF303099|WP_044549290.1 USDA_110|WP_011090303.1 113_2|113-2GL001567	Glycosyl transferase, family 2	M
	Core cluster	USDA205|WP_080577648.1 Sm2011|AGG72756.1 7653R|AID32536.1 MAFF303099|WP_010911566.1 USDA_110|WP_011085848.1 113_2|113-2GL006470	peptidase, M20	E
	Core cluster	USDA205|WP_014327088.1 Sm2011|AGG72999.1 7653R|AID33722.1 MAFF303099|WP_010912760.1 USDA_110|WP_011090831.1 113_2|113-2GL001067	Removes the formyl group from the N-terminal Met of newly synthesized proteins. Requires at least a dipeptide for an efficient rate of reaction. N-terminal L-methionine is a prerequisite for activity but the enzyme has broad specificity at other positions (By similarity)	J
	Core cluster	USDA205|WP_037392752.1 Sm2011|AGG74238.1 7653R|AID30326.1 MAFF303099|WP_010909692.1 USDA_110|WP_011087377.1 113_2|113-2GL004724	Protein of unknown function (DUF502)	S
	Core cluster	USDA205|WP_037394044.1 Sm2011|AGG75514.1 7653R|AID30900.1 MAFF303099|WP_010910182.1 USDA_110|WP_011086059.1 113_2|113-2GL006247	Precorrin-6A synthase (Deacetylating)	H
	Core cluster	USDA205|WP_037393723.1 Sm2011|AGG75642.1 7653R|AID33310.1 MAFF303099|WP_010912337.1 USDA_110|WP_011083287.1 113_2|113-2GL000415	succinyl-CoA synthetase subunit beta	C
	Core cluster	USDA205|WP_086018605.1 Sm2011|AGG74044.1 7653R|AID29994.2 MAFF303099|WP_044547564.1 USDA_110|WP_038967571.1 113_2|113-2GL004861	GTPase that associates with the 50S ribosomal subunit and may have a role during protein synthesis or ribosome biogenesis (By similarity)	S
	Core cluster	USDA205|WP_037434782.1 Sm2011|AGG70985.1 7653R|AID34178.1 MAFF303099|WP_010913164.1 USDA_110|WP_038965456.1 113_2|113-2GL001898	cytosine deaminase	F
	Core cluster	USDA205|WP_037429763.1 Sm2011|AGG75399.1 7653R|AID32341.2 MAFF303099|WP_032933739.1 USDA_110|WP_038965386.1 113_2|113-2GL008081	lytic murein transglycosylase	M
	Core cluster	USDA205|WP_042776321.1 Sm2011|AGG74185.1 7653R|AID30015.1 MAFF303099|WP_010909364.1 USDA_110|WP_011087288.1 113_2|113-2GL004834	D- polymerase III subunit delta'	L
	Core cluster	USDA205|WP_037391895.1 Sm2011|AGG73091.1 7653R|AID32879.1 MAFF303099|WP_010911900.1 USDA_110|WP_028172738.1 113_2|113-2GL008534	phosphate ABC transporter, permease	P
	Core cluster	USDA205|WP_014328909.1 Sm2011|AGG74712.1 7653R|AID30896.2 MAFF303099|WP_010910178.1 USDA_110|WP_011089248.1 113_2|113-2GL002736	hflc protein	O
	Core cluster	USDA205|WP_037397385.1 Sm2011|AGG72906.1 7653R|AID33566.1 MAFF303099|WP_010912587.1 USDA_110|WP_011083539.1 113_2|113-2GL000122	Catalyzes the conversion of epoxyqueuosine (oQ) to queuosine (Q), which is a hypermodified base found in the wobble positions of tR-(Asp), tR-(Asn), tR-(His) and tR-(Tyr) (By similarity)	C
	Core cluster	USDA205|WP_037428503.1 Sm2011|AGG72428.1 7653R|AID31091.1 MAFF303099|WP_010910358.1 USDA_110|WP_011089063.1 113_2|113-2GL002852	Dehydrogenase	C
	Core cluster	USDA205|WP_037393754.1 Sm2011|AGG75657.1 7653R|AID33282.1 MAFF303099|WP_044548456.1 USDA_110|WP_011083345.1 113_2|113-2GL000350	succinate dehydrogenase, flavoprotein subunit	C
	Core cluster	USDA205|WP_037398721.1 Sm2011|AGG72808.1 7653R|AID34285.1 MAFF303099|WP_010913280.1 USDA_110|WP_011090845.1 113_2|113-2GL001053	Nudix hydrolase	L
	Core cluster	USDA205|WP_080577619.1 Sm2011|AGG72914.1 7653R|AID33619.1 MAFF303099|WP_010912680.1 USDA_110|WP_007598495.1 113_2|113-2GL000157	Phosphatidylethanolamine N-methyltransferase phosphatidyl-N-methylethanolamine N-methyltransferase	I
	Core cluster	USDA205|WP_014327223.1 Sm2011|AGG73119.1 USDA_110|WP_014493934.1 113_2|113-2GL003298 7653R|AID30226.1 MAFF303099|WP_010909609.1	Transcriptional regulator	K
	Core cluster	USDA205|WP_153452133.1 Sm2011|AGG73568.1 7653R|AID33044.1 MAFF303099|WP_010912052.1 USDA_110|WP_011089987.1 113_2|113-2GL001926	HlyIII family	S
	Core cluster	USDA205|WP_037394645.1 Sm2011|AGG75262.1 7653R|AID32743.1 MAFF303099|WP_010911772.1 USDA_110|WP_011083009.1 113_2|113-2GL000712	-	-
	Core cluster	USDA205|WP_012709750.1 Sm2011|AGG75860.1 7653R|AID32984.2 MAFF303099|WP_010911994.1 USDA_110|WP_011086506.1 113_2|113-2GL005801	Acetoacetyl-CoA reductase	C
	Core cluster	USDA205|WP_014330823.1 Sm2011|AGG72947.1 7653R|AID27838.1 MAFF303099|WP_010913342.1 USDA_110|WP_011083654.1 113_2|113-2GL008801	Binds directly to 16S ribosomal R- (By similarity)	J
	Core cluster	USDA205|WP_014329848.1 Sm2011|AGG75476.1 7653R|AID32314.1 MAFF303099|WP_010911335.1 USDA_110|WP_011085190.1 113_2|113-2GL007230	UPF0176 protein	S
	Core cluster	USDA205|WP_037397407.1 Sm2011|AGG72911.1 7653R|AID33616.1 MAFF303099|WP_010912677.1 USDA_110|WP_011083510.1 113_2|113-2GL000154	Protein of unknown function (DUF1330)	S
	Core cluster	USDA205|WP_037393720.1 Sm2011|AGG75641.1 7653R|AID33307.1 MAFF303099|WP_010912334.1 USDA_110|WP_011083285.1 113_2|113-2GL000417	Succinyl-CoA ligase ADP-forming subunit alpha	C
	Core cluster	USDA205|WP_014328023.1 Sm2011|AGG73885.1 7653R|AID30190.1 MAFF303099|WP_044547669.1 USDA_110|WP_011087857.1 113_2|113-2GL004175	acyl-CoA dehydrogenase	I
	Core cluster	USDA205|WP_014327222.1 Sm2011|AGG73118.1 7653R|AID27870.1 MAFF303099|WP_010913371.1 USDA_110|WP_011083972.1 113_2|113-2GL008468	Putative transmembrane protein (Alph_Pro_TM)	S
	Core cluster	USDA205|WP_014330377.1 Sm2011|AGG72589.1 7653R|AID33495.1 MAFF303099|WP_044548537.1 USDA_110|WP_011083469.1 113_2|113-2GL000196	Import inner membrane translocase subunit TIM44	S
	Core cluster	USDA205|WP_037399607.1 Sm2011|AGG72954.1 7653R|AID33557.2 MAFF303099|WP_010912578.1 USDA_110|WP_011083500.1 113_2|113-2GL000165	Pyrophosphatase that hydrolyzes non-canonical purine nucleotides such as XTP and ITP dITP to their respective monophosphate derivatives. Might exclude non-canonical purines from D- precursor pool, thus preventing their incorporation into D- and avoiding chromosomal lesions (By similarity)	F
	Core cluster	USDA205|WP_014329144.1 Sm2011|AGG74961.1 7653R|AID32162.1 MAFF303099|WP_010911190.1 USDA_110|WP_011085246.1 113_2|113-2GL007164	Gcn5-related n-acetyltransferase	S
	Core cluster	USDA205|WP_014330511.1 Sm2011|AGG72727.1 7653R|AID27856.1 MAFF303099|WP_010913358.1 USDA_110|WP_011084251.1 113_2|113-2GL008148	type II secretion system protein	U
	Core cluster	USDA205|WP_014330395.1 Sm2011|AGG72606.1 7653R|AID33919.2 MAFF303099|WP_032932633.1 USDA_110|WP_028173002.1 113_2|113-2GL002033	Protein of unknown function (DUF2852)	S
	Core cluster	USDA205|WP_014857916.1 Sm2011|AGG70297.1 7653R|AID30208.1 MAFF303099|WP_010914152.1 USDA_110|WP_011085899.1 113_2|113-2GL006417	metallo-beta-lactamase	J
	Core cluster	USDA205|WP_014327603.1 Sm2011|AGG73492.1 7653R|AID28816.1 MAFF303099|WP_010914899.1 USDA_110|WP_011084134.1 113_2|113-2GL008284	Endonuclease that specifically degrades the R- of R-- D- hybrids (By similarity)	L
	Core cluster	USDA205|WP_014328107.1 Sm2011|AGG73988.1 7653R|AID30178.1 MAFF303099|WP_010909569.1 USDA_110|WP_011087921.1 113_2|113-2GL004101	conserved protein UCP032025	S
	Core cluster	USDA205|WP_014327867.1 Sm2011|AGG73764.1 7653R|AID29201.1 MAFF303099|WP_010915249.1 USDA_110|WP_028171111.1 113_2|113-2GL005350	phosphoribosylglycinamide formyltransferase	F
	Core cluster	USDA205|WP_014330091.1 Sm2011|AGG75759.1 7653R|AID33110.1 MAFF303099|WP_010912115.1 USDA_110|WP_011083261.1 113_2|113-2GL000442	Catalyzes the -DPH dependent reduction of L-gamma- glutamyl 5-phosphate into L-glutamate 5-semialdehyde and phosphate. The product spontaneously undergoes cyclization to form 1-pyrroline-5-carboxylate (By similarity)	E
	Core cluster	USDA205|WP_003528058.1 Sm2011|AGG74223.1 7653R|AID29940.1 MAFF303099|WP_006205430.1 USDA_110|WP_007603495.1 113_2|113-2GL004323	Nitrogen regulatory protein pii	E
	Core cluster	USDA205|WP_037399516.1 Sm2011|AGG73388.1 7653R|AID29410.1 MAFF303099|WP_032929795.1 USDA_110|WP_011090249.1 113_2|113-2GL001628	Inositol monophosphatase family protein	S
	Core cluster	USDA205|WP_037435607.1 Sm2011|AGG70536.1 7653R|AID31211.1 MAFF303099|WP_063825839.1 USDA_110|WP_038967531.1 113_2|113-2GL003693	Diguanylate cyclase phosphodiesterase	T
	Core cluster	USDA205|WP_153451496.1 Sm2011|AGG75940.1 7653R|AID33448.1 MAFF303099|WP_010912476.1 USDA_110|WP_011085186.1 113_2|113-2GL007235	Catalyzes the decarboxylation of four acetate groups of uroporphyrinogen-III to yield coproporphyrinogen-III (By similarity)	H
	Core cluster	USDA205|WP_012708186.1 Sm2011|AGG74389.1 7653R|AID30276.2 MAFF303099|WP_010909647.1 USDA_110|WP_007602124.1 113_2|113-2GL003372	Transcription factor that acts by binding directly to the R- polymerase (R-P). Required for negative regulation of rR- expression and positive regulation of several amino acid biosynthesis promoters (By similarity)	T
	Core cluster	USDA205|WP_014328970.1 Sm2011|AGG74787.1 7653R|AID31003.1 MAFF303099|WP_010910275.1 USDA_110|WP_011085234.1 113_2|113-2GL007179	lytic murein transglycosylase	M
	Core cluster	USDA205|WP_080577391.1 Sm2011|AGG75838.1 7653R|AID33318.2 MAFF303099|WP_010912346.1 USDA_110|WP_011083308.1 113_2|113-2GL000391	Catalyzes the stereoinversion of LL-2,6- diaminoheptanedioate (L,L-DAP) to meso-diaminoheptanedioate (meso- DAP), a precursor of L-lysine and an essential component of the bacterial peptidoglycan (By similarity)	E
	Core cluster	USDA205|WP_037428381.1 Sm2011|AGG72465.1 7653R|AID32571.1 MAFF303099|WP_010911600.1 USDA_110|WP_011084041.1 113_2|113-2GL008393	Phosphonate metabolism protein	P
	Core cluster	USDA205|WP_153451455.1 Sm2011|AGG73957.1 7653R|AID29919.1 MAFF303099|WP_006205445.1 USDA_110|WP_011088133.1 113_2|113-2GL003874	Located at the top of the head of the 30S subunit, it contacts several helices of the 16S rR-. In the 70S ribosome it contacts the 23S rR- (bridge B1a) and protein L5 of the 50S subunit (bridge B1b), connecting the 2 subunits	J
	Dispensable cluster	USDA205|WP_014328888.1 7653R|AID31964.1 MAFF303099|WP_010911015.1 USDA_110|WP_011085315.1 113_2|113-2GL007086 MAFF303099|WP_010913832.1	RhtB family transporter	E
	Core cluster	USDA205|WP_037436860.1 Sm2011|AGG73829.1 7653R|AID29596.1 MAFF303099|WP_010915643.1 USDA_110|WP_038966316.1 113_2|113-2GL004305	CoA-binding domain protein	S
	Core cluster	USDA205|WP_012709685.1 Sm2011|AGG75673.1 7653R|AID33191.1 MAFF303099|WP_027047523.1 USDA_110|WP_007598721.1 113_2|113-2GL000310	YGGT family	S
	Core cluster	USDA205|WP_037397492.1 Sm2011|AGG72943.1 7653R|AID32463.2 MAFF303099|WP_010911463.1 USDA_110|WP_011083583.1 113_2|113-2GL000073	Required, probably indirectly, for the hydroxylation of 2-octaprenylphenol to 2-octaprenyl-6-hydroxy-phenol, the fourth step in ubiquinone biosynthesis (By similarity)	H
	Core cluster	USDA205|WP_014330383.1 Sm2011|AGG72595.1 7653R|AID30626.1 MAFF303099|WP_010909958.1 USDA_110|WP_011083629.1 113_2|113-2GL000025	Aldehyde dehydrogenase	C
	Core cluster	USDA205|WP_037400764.1 Sm2011|AGG75876.1 7653R|AID32990.1 MAFF303099|WP_010912000.1 USDA_110|WP_011090841.1 113_2|113-2GL001057	ABC transporter	E
	Core cluster	USDA205|WP_037394210.1 Sm2011|AGG75434.1 7653R|AID28881.1 MAFF303099|WP_010914967.1 USDA_110|WP_011089198.1 113_2|113-2GL002793	Catalyzes the synthesis of ADP-glucose, a sugar donor used in elongation reactions on alpha-glucans (By similarity)	G
	Core cluster	USDA205|WP_014327074.1 Sm2011|AGG72987.1 7653R|AID34314.1 MAFF303099|WP_010913309.1 USDA_110|WP_038965162.1 113_2|113-2GL000040	Single strand-specific metallo-endoribonuclease involved in late-stage 70S ribosome quality control and in maturation of the 3' terminus of the 16S rR- (By similarity)	S
	Core cluster	USDA205|WP_014328083.1 Sm2011|AGG73965.1 7653R|AID33730.1 MAFF303099|WP_010912766.1 USDA_110|WP_028171053.1 113_2|113-2GL005439	Small multidrug resistance protein	P
	Core cluster	USDA205|WP_014328054.1 Sm2011|AGG73917.1 7653R|AID29871.1 MAFF303099|WP_044547503.1 USDA_110|WP_063921492.1 113_2|113-2GL003745	R- methyltransferase, TrmH family, group 3	J
	Core cluster	USDA205|WP_060563248.1 Sm2011|AGG75039.1 7653R|AID31054.1 MAFF303099|WP_010910324.1 USDA_110|WP_011089481.1 113_2|113-2GL002483	Oxidoreductase	E
	Core cluster	USDA205|WP_037396615.1 Sm2011|AGG74420.1 7653R|AID30303.1 MAFF303099|WP_010909671.1 USDA_110|WP_011088637.1 113_2|113-2GL003309	major facilitator superfamily MFS_1	P
	Core cluster	USDA205|WP_014329551.1 Sm2011|AGG75250.1 7653R|AID32719.1 MAFF303099|WP_010911745.1 USDA_110|WP_011084210.1 113_2|113-2GL008197	acyltransferase	I
	Core cluster	USDA205|WP_037393897.1 Sm2011|AGG75831.1 7653R|AID29458.2 MAFF303099|WP_010915533.1 USDA_110|WP_011083300.1 113_2|113-2GL000399	Heme exporter protein	O
	Core cluster	USDA205|WP_153451683.1 Sm2011|AGG73413.1 7653R|AID28739.1 MAFF303099|WP_010914826.1 USDA_110|WP_011084006.1 113_2|113-2GL008432	it plays a direct role in the translocation of protons across the membrane (By similarity)	C
	Core cluster	USDA205|WP_014330662.1 Sm2011|AGG72818.1 7653R|AID34324.2 MAFF303099|WP_010913321.1 USDA_110|WP_011083606.1 113_2|113-2GL000049	nucleic-acid-binding protein	K
	Core cluster	USDA205|WP_037394113.1 Sm2011|AGG75496.1 7653R|AID34271.2 MAFF303099|WP_010913266.1 USDA_110|WP_011083964.1 113_2|113-2GL008476	mR- 3'-end processing factor	J
	Core cluster	USDA205|WP_014330100.1 Sm2011|AGG75767.1 7653R|AID34305.1 MAFF303099|WP_010913300.1 USDA_110|WP_011089420.1 113_2|113-2GL002549	Iron-storage protein	P
	Core cluster	USDA205|WP_050984096.1 Sm2011|AGG72645.1 7653R|AID34138.1 MAFF303099|WP_157866038.1 USDA_110|WP_011083725.1 113_2|113-2GL008742	Protein of unknown function (DUF1052)	S
	Core cluster	USDA205|WP_037399612.1 Sm2011|AGG72961.1 7653R|AID32497.1 MAFF303099|WP_010911488.1 USDA_110|WP_011083548.1 113_2|113-2GL000113	Sigma factors are initiation factors that promote the attachment of R- polymerase to specific initiation sites and are then released (By similarity)	K
	Core cluster	USDA205|WP_014330673.1 Sm2011|AGG72829.1 7653R|AID34336.2 MAFF303099|WP_010913333.1 USDA_110|WP_008131763.1 113_2|113-2GL000065	regulator Fur family	K
	Core cluster	USDA205|WP_014327596.1 Sm2011|AGG73487.1 7653R|AID28809.2 MAFF303099|WP_010914893.1 USDA_110|WP_011083994.1 113_2|113-2GL008445	cytochrome c oxidase, subunit III	C
	Core cluster	USDA205|WP_014327033.1 Sm2011|AGG72949.1 7653R|AID32210.1 MAFF303099|WP_010911241.1 USDA_110|WP_011089906.1 113_2|113-2GL002020	Ycii-related protein	S
	Core cluster	USDA205|WP_037393583.1 Sm2011|AGG75377.1 7653R|AID32954.1 MAFF303099|WP_010911967.1 USDA_110|WP_011089852.1 113_2|113-2GL002084	Phosphoribosylaminoimidazole carboxylase ATPase subunit	F
	Core cluster	USDA205|WP_037393472.1 Sm2011|AGG74058.1 7653R|AID29305.1 MAFF303099|WP_044550107.1 USDA_110|WP_011087217.1 113_2|113-2GL004913	cystathionine beta-lyase	E
	Core cluster	USDA205|WP_081318993.1 Sm2011|AGG73445.1 7653R|AID28767.1 MAFF303099|WP_010914850.1 USDA_110|WP_011085355.1 113_2|113-2GL007040	FAD linked oxidase domain protein	C
	Core cluster	USDA205|WP_037395291.1 Sm2011|AGG73260.1 7653R|AID32264.1 MAFF303099|WP_010911293.1 USDA_110|WP_011089595.1 113_2|113-2GL002358	flagellar hook-associated protein	N
	Core cluster	USDA205|WP_037400126.1 Sm2011|AGG74282.1 7653R|AID33828.1 MAFF303099|WP_010913489.1 USDA_110|WP_011084958.1 113_2|113-2GL007522	Transketolase	G
	Core cluster	USDA205|WP_014328071.1 Sm2011|AGG73951.1 7653R|AID29913.1 MAFF303099|WP_010909284.1 USDA_110|WP_007603036.1 113_2|113-2GL003868	This is one of the proteins that binds and probably mediates the attachment of the 5S R- into the large ribosomal subunit, where it forms part of the central protuberance (By similarity)	J
	Core cluster	USDA205|WP_037398683.1 Sm2011|AGG75932.1 7653R|AID33438.1 MAFF303099|WP_010912466.1 USDA_110|WP_011083456.1 113_2|113-2GL000211	D- polymerase III subunit delta	L
	Core cluster	USDA205|WP_041409502.1 Sm2011|AGG73484.1 7653R|AID28806.1 MAFF303099|WP_010914890.1 USDA_110|WP_011083991.1 113_2|113-2GL008448	Converts heme B (protoheme IX) to heme O by substitution of the vinyl group on carbon 2 of heme B porphyrin ring with a hydroxyethyl farnesyl side group (By similarity)	O
	Core cluster	USDA205|WP_014329248.1 Sm2011|AGG75012.1 7653R|AID29508.2 USDA_110|WP_038966082.1 113_2|113-2GL001076 MAFF303099|WP_010915574.1	Protein of unknown function (DUF423)	S
	Core cluster	USDA205|WP_037400794.1 Sm2011|AGG74957.1 7653R|AID32105.1 MAFF303099|WP_010911139.1 USDA_110|WP_011085252.1 113_2|113-2GL007157	ATPase associated with various cellular activities, AAA_3	S
	Core cluster	USDA205|WP_037393574.1 Sm2011|AGG75383.1 7653R|AID32963.1 MAFF303099|WP_044551000.1 USDA_110|WP_028173016.1 113_2|113-2GL002063	Deoxycytidine triphosphate deaminase	S
	Core cluster	USDA205|WP_014327294.1 Sm2011|AGG70429.1 7653R|AID29059.1 MAFF303099|WP_010915130.1 USDA_110|WP_011083350.1 113_2|113-2GL000344	glyoxalase bleomycin resistance protein dioxygenase	E
	Core cluster	USDA205|WP_014327362.1 Sm2011|AGG73267.1 7653R|AID32285.1 MAFF303099|WP_010911311.1 USDA_110|WP_011089589.1 113_2|113-2GL002365	Flagellar biosynthesis protein FliR	N
	Core cluster	USDA205|WP_037428539.1 Sm2011|AGG72398.1 7653R|AID29870.1 MAFF303099|WP_010909249.1 USDA_110|WP_011085952.1 113_2|113-2GL006354	Dehydrogenase	I
	Core cluster	USDA205|WP_014328004.1 Sm2011|AGG73868.1 7653R|AID30764.1 MAFF303099|WP_032930709.1 USDA_110|WP_011087642.1 113_2|113-2GL004402	Part of the ABC transporter complex LolCDE involved in the translocation of mature outer membrane-directed lipoproteins, from the inner membrane to the periplasmic chaperone, LolA. Responsible for the formation of the LolA-lipoprotein complex in an ATP-dependent manner (By similarity)	P
	Core cluster	USDA205|WP_014327355.1 Sm2011|AGG73259.1 7653R|AID32263.1 MAFF303099|WP_010911292.1 USDA_110|WP_011089596.1 113_2|113-2GL002357	Flagellar hook protein flgE	N
	Core cluster	USDA205|WP_012706639.1 Sm2011|AGG72993.1 7653R|AID32494.1 MAFF303099|WP_032920755.1 USDA_110|WP_011083553.1 113_2|113-2GL000108	Protein of unknown function (DUF1150)	S
	Core cluster	USDA205|WP_014330061.1 Sm2011|AGG75659.1 7653R|AID33284.2 MAFF303099|WP_010912305.1 USDA_110|WP_011083343.1 113_2|113-2GL000352	Succinate dehydrogenase cytochrome b556 subunit	C
	Core cluster	USDA205|WP_037431030.1 Sm2011|AGG74758.1 7653R|AID30977.1 MAFF303099|WP_010910248.1 USDA_110|WP_011089336.1 113_2|113-2GL002637	Essential cell division protein that forms a contractile ring structure (Z ring) at the future cell division site. The regulation of the ring assembly controls the timing and the location of cell division. One of the functions of the FtsZ ring is to recruit other cell division proteins to the septum to produce a new cell wall between the dividing cells. Binds GTP and shows GTPase activity (By sim…	D
	Core cluster	USDA205|WP_014328146.1 Sm2011|AGG74025.1 7653R|AID29979.1 MAFF303099|WP_010909332.1 USDA_110|WP_011087550.1 113_2|113-2GL004507	pyruvate dehydrogenase subunit beta	C
	Core cluster	USDA205|WP_037399498.1 Sm2011|AGG73404.1 7653R|AID33609.1 MAFF303099|WP_044548629.1 USDA_110|WP_011087614.1 113_2|113-2GL004436	Short-chain dehydrogenase reductase SDR	S
	Core cluster	USDA205|WP_014327969.1 Sm2011|AGG73830.1 7653R|AID29597.1 MAFF303099|WP_010915644.1 USDA_110|WP_011087730.1 113_2|113-2GL004303	O-acetylhomoserine	E
	Core cluster	USDA205|WP_037396922.1 Sm2011|AGG74755.1 7653R|AID30974.1 MAFF303099|WP_010910244.1 USDA_110|WP_011089333.1 113_2|113-2GL002641	May be involved in recombinational repair of damaged D- (By similarity)	L
	Core cluster	USDA205|WP_014327201.1 Sm2011|AGG73097.1 7653R|AID27891.1 MAFF303099|WP_010913393.1 USDA_110|WP_038965252.1 113_2|113-2GL008528	acetylornithine aminotransferase	E
	Core cluster	USDA205|WP_014330412.1 Sm2011|AGG72625.1 7653R|AID33942.2 MAFF303099|WP_010912942.1 USDA_110|WP_008542552.1 113_2|113-2GL001031	Two component transcriptional regulator, winged helix family	T
	Core cluster	USDA205|WP_037400566.1 Sm2011|AGG74484.1 7653R|AID31999.1 MAFF303099|WP_010911043.1 USDA_110|WP_011085217.1 113_2|113-2GL007198	Thioesterase superfamily protein	I
	Core cluster	USDA205|WP_003531854.1 Sm2011|AGG73856.1 7653R|AID30775.1 MAFF303099|WP_010910101.1 USDA_110|WP_008547737.1 113_2|113-2GL004368	NDH-1 shuttles electrons from -DH, via FMN and iron- sulfur (Fe-S) centers, to quinones in the respiratory chain. The immediate electron acceptor for the enzyme in this species is believed to be ubiquinone. Couples the redox reaction to proton translocation (for every two electrons transferred, four hydrogen ions are translocated across the cytoplasmic membrane), and thus conserves the redox ener…	C
	Core cluster	USDA205|WP_037428534.1 Sm2011|AGG72400.1 7653R|AID29868.2 MAFF303099|WP_010909247.1 USDA_110|WP_011085950.1 113_2|113-2GL006356	glyoxylate carboligase	S
	Core cluster	USDA205|WP_037398737.1 Sm2011|AGG72833.1 7653R|AID34047.1 MAFF303099|WP_010913039.1 USDA_110|WP_038965151.1 113_2|113-2GL000098	5-enolpyruvylshikimate-3-phosphate synthase	E
	Core cluster	USDA205|WP_014329701.1 Sm2011|AGG75326.1 7653R|AID33015.1 MAFF303099|WP_010912022.1 USDA_110|WP_011089881.1 113_2|113-2GL002052	Acts as a processive, ATP-dependent zinc metallopeptidase for both cytoplasmic and membrane proteins. Plays a role in the quality control of integral membrane proteins (By similarity)	O
	Core cluster	USDA205|WP_034859514.1 Sm2011|AGG70132.1 7653R|AID34804.1 MAFF303099|WP_010913571.1 USDA_110|WP_011084835.1 113_2|113-2GL007641	Electron transfer flavoprotein	C
	Core cluster	USDA205|WP_014329657.1 Sm2011|AGG75321.1 7653R|AID33007.2 MAFF303099|WP_010912015.1 USDA_110|WP_011090136.1 113_2|113-2GL001758	D-3-phosphoglycerate dehydrogenase	E
	Core cluster	USDA205|WP_014329346.1 Sm2011|AGG75108.1 7653R|AID30503.1 MAFF303099|WP_010909859.1 USDA_110|WP_011086566.1 113_2|113-2GL005735	cytochrome C oxidase subunit II	C
	Core cluster	USDA205|WP_014327041.1 Sm2011|AGG72957.1 7653R|AID33554.1 MAFF303099|WP_010912575.1 USDA_110|WP_011083502.1 113_2|113-2GL000163	Negative regulator of class I heat shock genes (grpE- dnaK-dnaJ and groELS operons). Prevents heat-shock induction of these operons (By similarity)	K
	Core cluster	USDA205|WP_060564108.1 Sm2011|AGG74019.1 7653R|AID30125.2 MAFF303099|WP_010909518.1 USDA_110|WP_011087573.1 113_2|113-2GL004482	Catalyzes the ATP-dependent amination of UTP to CTP with either L-glutamine or ammonia as the source of nitrogen (By similarity)	F
	Core cluster	USDA205|WP_014330363.1 Sm2011|AGG75933.1 7653R|AID33440.1 MAFF303099|WP_010912468.1 USDA_110|WP_038965125.1 113_2|113-2GL000210	Chromosome Partitioning Protein	K
	Core cluster	USDA205|WP_037399592.1 Sm2011|AGG73363.1 7653R|AID28325.1 MAFF303099|WP_010914427.1 USDA_110|WP_011085340.1 113_2|113-2GL007056	D--3-methyladenine glycosylase i	L
	Core cluster	USDA205|WP_153452060.1 Sm2011|AGG69837.1 7653R|AID31263.1 MAFF303099|WP_010910511.1 USDA_110|WP_011089374.1 113_2|113-2GL002597	Methyltransferase type 11	S
	Core cluster	USDA205|WP_037398185.1 Sm2011|AGG72605.1 7653R|AID33501.1 MAFF303099|WP_010912523.1 USDA_110|WP_011083730.1 113_2|113-2GL008736	Polyhydroxyalkanoate depolymerase, intracellular	I
	Core cluster	USDA205|WP_014327952.1 Sm2011|AGG73815.1 7653R|AID29570.2 MAFF303099|WP_032933354.1 USDA_110|WP_028172554.1 113_2|113-2GL008797	polysaccharide export protein	M
	Core cluster	USDA205|WP_012709630.1 Sm2011|AGG75801.1 7653R|AID33259.1 MAFF303099|WP_010912284.1 USDA_110|WP_008142830.1 113_2|113-2GL000220	Two component transcriptional regulator, winged helix family	T
	Core cluster	USDA205|WP_014329715.1 Sm2011|AGG75339.1 7653R|AID33027.1 MAFF303099|WP_044548388.1 USDA_110|WP_011084355.1 113_2|113-2GL008038	Metallophosphoesterase	S
	Core cluster	USDA205|WP_014328058.1 Sm2011|AGG73926.1 7653R|AID29886.1 MAFF303099|WP_010909265.1 USDA_110|WP_011088160.1 113_2|113-2GL003841	Seems to be the binding site for several of the factors involved in protein synthesis and appears to be essential for accurate translation (By similarity)	J
	Dispensable cluster	USDA205|WP_080577511.1 Sm2011|AGG70690.1 USDA_110|WP_038966830.1 113_2|113-2GL005201 USDA_110|WP_011089705.1 113_2|113-2GL002249	Major facilitator superfamily	G
	Core cluster	USDA205|WP_037398216.1 Sm2011|AGG72590.1 7653R|AID33496.2 MAFF303099|WP_010912517.1 USDA_110|WP_038965126.1 113_2|113-2GL000195	membrane-bound lytic murein transglycosylase	M
	Core cluster	USDA205|WP_037400923.1 Sm2011|AGG74695.1 7653R|AID30874.1 MAFF303099|WP_010910155.1 USDA_110|WP_011087268.1 113_2|113-2GL004856	Nitrile hydratase	Q
	Core cluster	USDA205|WP_014328073.1 Sm2011|AGG73954.1 7653R|AID29916.1 MAFF303099|WP_010909286.1 USDA_110|WP_011088136.1 113_2|113-2GL003871	Binds to the 23S rR- (By similarity)	J
	Core cluster	USDA205|WP_037401193.1 Sm2011|AGG73342.1 7653R|AID29485.1 MAFF303099|WP_010915553.1 USDA_110|WP_028171008.1 113_2|113-2GL005503	MAPEG family	S
	Core cluster	USDA205|WP_014857642.1 Sm2011|AGG70137.1 7653R|AID34762.2 MAFF303099|WP_010913611.1 USDA_110|WP_011084554.1 113_2|113-2GL007903	nitrogenase MoFe cofactor biosynthesis protein NifE	C
	Core cluster	USDA205|WP_014327740.1 Sm2011|AGG73612.1 7653R|AID28991.1 MAFF303099|WP_010915063.1 USDA_110|WP_011085311.1 113_2|113-2GL007090	electron transfer flavoprotein-ubiquinone oxidoreductase	C
	Core cluster	USDA205|WP_014328198.1 Sm2011|AGG74079.1 7653R|AID30154.1 MAFF303099|WP_010909548.1 USDA_110|WP_051000402.1 113_2|113-2GL004425	Phosphatidate cytidylyltransferase	I
	Core cluster	USDA205|WP_037393412.1 Sm2011|AGG74113.1 7653R|AID30534.1 MAFF303099|WP_010909887.1 USDA_110|WP_038967258.1 113_2|113-2GL004549	Catalyzes the methyl esterification of L-isoaspartyl residues in peptides and proteins that result from spontaneous decomposition of normal L-aspartyl and L-asparaginyl residues. It plays a role in the repair and or degradation of damaged proteins (By similarity)	O
	Core cluster	USDA205|WP_153451681.1 Sm2011|AGG75511.1 7653R|AID30793.1 MAFF303099|WP_010910119.1 USDA_110|WP_011086050.1 113_2|113-2GL006256	Precorrin-2 C(20)-methyltransferase	H
	Core cluster	USDA205|WP_037391275.1 Sm2011|AGG73594.1 7653R|AID28971.2 MAFF303099|WP_167316210.1 USDA_110|WP_011085906.1 113_2|113-2GL006406	Histidine kinase	T
	Core cluster	USDA205|WP_037392963.1 Sm2011|AGG74330.1 7653R|AID29831.1 MAFF303099|WP_010909224.1 USDA_110|WP_011087120.1 113_2|113-2GL005096	Helicase	L
	Core cluster	USDA205|WP_014327551.1 Sm2011|AGG73436.1 7653R|AID28772.2 MAFF303099|WP_010914855.1 USDA_110|WP_011090230.1 113_2|113-2GL001647	Phosphoribosylglycinamide synthetase	F
	Core cluster	USDA205|WP_037395481.1 Sm2011|AGG74505.1 7653R|AID34009.1 MAFF303099|WP_044548765.1 USDA_110|WP_011086531.1 113_2|113-2GL005776	Trap dicarboxylate transporter, dctm subunit	Q
	Core cluster	USDA205|WP_037392592.1 Sm2011|AGG73495.1 7653R|AID28821.2 MAFF303099|WP_027046619.1 USDA_110|WP_011084308.1 113_2|113-2GL008087	UPF0301 protein	K
	Core cluster	USDA205|WP_014330084.1 Sm2011|AGG75779.1 7653R|AID30625.2 MAFF303099|WP_010909957.1 USDA_110|WP_011085990.1 113_2|113-2GL006315	Converts alpha-aldose to the beta-anomer. It is active on D-glucose, L-arabinose, D-xylose, D-galactose, maltose and lactose (By similarity)	G
	Core cluster	USDA205|WP_014330820.1 Sm2011|AGG72944.1 7653R|AID32462.1 MAFF303099|WP_010911462.1 USDA_110|WP_011083584.1 113_2|113-2GL000072	Methyltransferase required for the conversion of demethylmenaquinone (DMKH2) to menaquinone (MKH2) and the conversion of 2-polyprenyl-6-methoxy-1,4-benzoquinol (DDMQH2) to 2-polyprenyl-3-methyl-6-methoxy-1,4-benzoquinol (DMQH2) (By similarity)	H
	Core cluster	USDA205|WP_037399505.1 Sm2011|AGG73401.1 7653R|AID33612.1 MAFF303099|WP_044548633.1 USDA_110|WP_038966051.1 113_2|113-2GL006314	SMP-30 Gluconolaconase LRE domain protein	G
	Core cluster	USDA205|WP_014327246.1 Sm2011|AGG73147.1 7653R|AID34041.1 MAFF303099|WP_010913034.1 USDA_110|WP_011085749.1 113_2|113-2GL006574	Acetolactate synthase, large subunit	E
	Core cluster	USDA205|WP_037394027.1 Sm2011|AGG75523.1 7653R|AID33434.1 MAFF303099|WP_010912463.1 USDA_110|WP_011089073.1 113_2|113-2GL002841	Branched-chain alpha-keto acid dehydrogenase	C
	Core cluster	USDA205|WP_080577250.1 Sm2011|AGG73192.1 7653R|AID27977.2 MAFF303099|WP_080512106.1 USDA_110|WP_011084076.1 113_2|113-2GL008336	protein tyrosine phosphatase	T
	Core cluster	USDA205|WP_037393894.1 Sm2011|AGG75833.1 7653R|AID33328.1 MAFF303099|WP_010912355.1 USDA_110|WP_011083302.1 113_2|113-2GL000397	Thiol disulfide interchange protein	O
	Core cluster	USDA205|WP_012709334.1 Sm2011|AGG75378.1 7653R|AID32956.1 MAFF303099|WP_006327841.1 USDA_110|WP_006611362.1 113_2|113-2GL001594	50S ribosomal protein L36	J
	Core cluster	USDA205|WP_014329654.1 Sm2011|AGG75319.1 7653R|AID33005.1 MAFF303099|WP_010912013.1 USDA_110|WP_011089789.1 113_2|113-2GL002148	Plays an important role in the de novo pathway of purine nucleotide biosynthesis	F
	Core cluster	USDA205|WP_037393508.1 Sm2011|AGG75414.1 7653R|AID32353.1 MAFF303099|WP_044548309.1 USDA_110|WP_011090456.1 113_2|113-2GL001383	inositol mono-phosphatase	G
	Core cluster	USDA205|WP_014328449.1 Sm2011|AGG74167.1 7653R|AID30229.2 MAFF303099|WP_010909611.1 USDA_110|WP_038967463.1 113_2|113-2GL004632	Exchanges the guanine residue with 7-aminomethyl-7- deazaguanine in tR-s with GU(N) anticodons (tR--Asp, -Asn, -His and -Tyr). After this exchange, a cyclopentendiol moiety is attached to the 7-aminomethyl group of 7-deazaguanine, resulting in the hypermodified nucleoside queuosine (Q) (7-(((4,5-cis- dihydroxy-2-cyclopenten-1-yl)amino)methyl)-7-deazaguanosine) (By similarity)	J
	Core cluster	USDA205|WP_037391266.1 Sm2011|AGG73602.1 7653R|AID28979.1 MAFF303099|WP_044549803.1 USDA_110|WP_011085916.1 113_2|113-2GL006396	Histidine kinase	T
	Core cluster	USDA205|WP_037393467.1 Sm2011|AGG74062.1 7653R|AID29780.1 MAFF303099|WP_027046788.1 USDA_110|WP_028175407.1 113_2|113-2GL003644	serine o-acetyltransferase	E
	Core cluster	USDA205|WP_014327402.1 Sm2011|AGG73306.1 7653R|AID33090.1 MAFF303099|WP_010912097.1 USDA_110|WP_011086731.1 113_2|113-2GL005535	Methylmalonate-semialdehyde dehydrogenase	C
	Core cluster	USDA205|WP_014327555.1 Sm2011|AGG73442.1 7653R|AID28769.1 MAFF303099|WP_010914852.1 USDA_110|WP_011090253.1 113_2|113-2GL001624	Synthesis of 3-octaprenyl-4-hydroxybenzoate (By similarity)	H
	Core cluster	USDA205|WP_153451748.1 Sm2011|AGG75602.1 7653R|AID30219.1 MAFF303099|WP_010909602.1 USDA_110|WP_011085223.1 113_2|113-2GL007191	Glycerol-3-phosphate dehydrogenase	C
	Core cluster	USDA205|WP_014329828.1 Sm2011|AGG75455.1 7653R|AID34002.1 MAFF303099|WP_010912998.1 USDA_110|WP_011082920.1 113_2|113-2GL000807	D-isomer specific 2-hydroxyacid dehydrogenase	C
	Core cluster	USDA205|WP_037399659.1 Sm2011|AGG72988.1 7653R|AID34315.2 MAFF303099|WP_010913310.1 USDA_110|WP_028172525.1 113_2|113-2GL000041	CBS domain	P
	Core cluster	USDA205|WP_014330675.1 Sm2011|AGG72831.1 7653R|AID30182.1 MAFF303099|WP_010909572.1 USDA_110|WP_038966324.1 113_2|113-2GL004289	DUF218 domain	S
	Core cluster	USDA205|WP_014329314.1 Sm2011|AGG75077.1 7653R|AID33080.1 MAFF303099|WP_010912089.1 USDA_110|WP_011088417.1 113_2|113-2GL003551	Amino acid ABC transporter (Permease)	E
	Core cluster	USDA205|WP_014332042.1 Sm2011|AGG70737.1 7653R|AID31150.2 MAFF303099|WP_010910412.1 USDA_110|WP_011089000.1 113_2|113-2GL002917	Has an important function as a repair enzyme for proteins that have been inactivated by oxidation. Catalyzes the reversible oxidation-reduction of methionine sulfoxide in proteins to methionine (By similarity)	O
	Core cluster	USDA205|WP_014328111.1 Sm2011|AGG73992.1 7653R|AID29787.1 MAFF303099|WP_010909192.1 USDA_110|WP_038967896.1 113_2|113-2GL003664	Transglutaminase family protein cysteine peptidase, btlcp	S
	Core cluster	USDA205|WP_012708543.1 Sm2011|AGG74702.1 7653R|AID30879.1 MAFF303099|WP_010910160.1 USDA_110|WP_011089241.1 113_2|113-2GL002744	Acetolactate synthase small subunit	E
	Core cluster	USDA205|WP_014327673.1 Sm2011|AGG73547.1 7653R|AID28928.1 MAFF303099|WP_010915005.1 USDA_110|WP_011090289.1 113_2|113-2GL001582	Haloacid dehalogenase type II	S
	Core cluster	USDA205|WP_153452080.1 Sm2011|AGG71732.1 7653R|AID33418.2 MAFF303099|WP_044548507.1 USDA_110|WP_028171361.1 113_2|113-2GL003795	Translation initiation inhibitor	J
	Core cluster	USDA205|WP_060563958.1 Sm2011|AGG72716.1 7653R|AID27844.1 MAFF303099|WP_032932918.1 USDA_110|WP_011086719.1 113_2|113-2GL005546	TadE family	U
	Core cluster	USDA205|WP_014327601.1 Sm2011|AGG73490.1 7653R|AID28814.1 MAFF303099|WP_010914897.1 USDA_110|WP_011084132.1 113_2|113-2GL008286	Converts 1-hydroxy-2-methyl-2-(E)-butenyl 4-diphosphate into isopentenyl diphosphate (IPP) and dimethylallyl diphosphate (DMAPP) (By similarity)	I
	Core cluster	USDA205|WP_037397470.1 Sm2011|AGG72929.1 7653R|AID30680.2 MAFF303099|WP_010910009.1 USDA_110|WP_038965112.1 113_2|113-2GL000248	UDP-glucose 4-epimerase (EC 5.1.3.2)	M
	Core cluster	USDA205|WP_037428795.1 Sm2011|AGG72073.1 7653R|AID30312.2 MAFF303099|WP_162034348.1 USDA_110|WP_038966424.1 113_2|113-2GL002611	ABC transporter	V
	Core cluster	USDA205|WP_003527546.1 Sm2011|AGG75306.1 7653R|AID32176.1 MAFF303099|WP_006203587.1 USDA_110|WP_002714638.1 113_2|113-2GL002216	Protein of unknown function (DUF1153)	S
	Core cluster	USDA205|WP_014328357.1 Sm2011|AGG74209.1 7653R|AID29959.1 MAFF303099|WP_010909317.1 USDA_110|WP_028172194.1 113_2|113-2GL006343	transcriptional regulator AsnC family	K
	Core cluster	USDA205|WP_153451793.1 Sm2011|AGG73195.1 7653R|AID27974.1 MAFF303099|WP_010914060.1 USDA_110|WP_011084078.1 113_2|113-2GL008334	Inhibits all the catalytic activities of D- gyrase by preventing its interaction with D-. Acts by binding directly to the C-terminal domain of GyrB, which probably disrupts D- binding by the gyrase (By similarity)	S
	Core cluster	USDA205|WP_037398124.1 Sm2011|AGG72646.1 7653R|AID34136.2 MAFF303099|WP_044551141.1 USDA_110|WP_008141807.1 113_2|113-2GL008741	response regulator	T
	Core cluster	USDA205|WP_014330072.1 Sm2011|AGG75788.1 7653R|AID33267.2 MAFF303099|WP_010912290.1 USDA_110|WP_038965116.1 113_2|113-2GL000228	ammonium Transporter	P
	Core cluster	USDA205|WP_037395204.1 Sm2011|AGG73316.1 7653R|AID29447.2 MAFF303099|WP_010915523.1 USDA_110|WP_011083946.1 113_2|113-2GL008497	endoribonuclease L-PSP	J
	Core cluster	USDA205|WP_012707761.1 Sm2011|AGG73945.1 7653R|AID29907.1 MAFF303099|WP_006205457.1 USDA_110|WP_007603030.1 113_2|113-2GL003862	Binds to 23S rR-. Forms part of two intersubunit bridges in the 70S ribosome (By similarity)	J
	Core cluster	USDA205|WP_014327810.1 Sm2011|AGG73697.1 7653R|AID29068.1 MAFF303099|WP_010915139.1 USDA_110|WP_028170865.1 113_2|113-2GL005725	decarboxylase family	S
	Core cluster	USDA205|WP_037392753.1 Sm2011|AGG74237.1 7653R|AID30325.2 MAFF303099|WP_010909691.1 USDA_110|WP_011087374.1 113_2|113-2GL004727	ATP-dependent D- helicase (RecG)	L
	Core cluster	USDA205|WP_037401094.1 Sm2011|AGG72362.1 7653R|AID33512.1 MAFF303099|WP_010912536.1 USDA_110|WP_011088434.1 113_2|113-2GL003533	regulator, luxr family	T
	Core cluster	USDA205|WP_037391509.1 Sm2011|AGG71476.1 7653R|AID31333.2 MAFF303099|WP_010910574.1 USDA_110|WP_038967644.1 113_2|113-2GL005464	Dehydrogenase	S
	Core cluster	USDA205|WP_014327684.1 Sm2011|AGG73556.1 7653R|AID28932.1 MAFF303099|WP_010915009.1 USDA_110|WP_011088649.1 113_2|113-2GL003297	cytochrome c	C
	Core cluster	USDA205|WP_014329833.1 Sm2011|AGG75460.1 7653R|AID33994.1 MAFF303099|WP_010912990.1 USDA_110|WP_063921554.1 113_2|113-2GL001347	WD-40 repeat-containing protein	S
	Core cluster	USDA205|WP_037395288.1 Sm2011|AGG73261.1 7653R|AID32265.1 MAFF303099|WP_010911294.1 USDA_110|WP_011089594.1 113_2|113-2GL002359	flagellar hook-associated protein	N
	Core cluster	USDA205|WP_014327286.1 Sm2011|AGG73189.1 7653R|AID27980.1 MAFF303099|WP_019860404.1 USDA_110|WP_028173638.1 113_2|113-2GL008339	Protein of unknown function (DUF2948)	S
	Core cluster	USDA205|WP_037394656.1 Sm2011|AGG75257.1 7653R|AID32734.1 MAFF303099|WP_010911761.1 USDA_110|WP_011083055.1 113_2|113-2GL000665	cupin superfamily protein	S
	Core cluster	USDA205|WP_037391140.1 Sm2011|AGG73740.1 7653R|AID29172.1 MAFF303099|WP_010915227.1 USDA_110|WP_011086892.1 113_2|113-2GL005360	ABC transporter	S
	Core cluster	USDA205|WP_014328934.1 Sm2011|AGG74744.1 7653R|AID30966.2 MAFF303099|WP_032930809.1 USDA_110|WP_011083950.1 113_2|113-2GL008492	Electron transport protein SCO1 SenC	S
	Core cluster	USDA205|WP_037395420.1 Sm2011|AGG74531.1 7653R|AID30734.1 MAFF303099|WP_044550584.1 USDA_110|WP_038966030.1 113_2|113-2GL006264	decarboxylase	H
	Core cluster	USDA205|WP_037397626.1 Sm2011|AGG74136.1 7653R|AID30259.1 MAFF303099|WP_010909634.1 USDA_110|WP_028173428.1 113_2|113-2GL003583	Protein of unknown function DUF72	S
	Core cluster	USDA205|WP_037395404.1 Sm2011|AGG74545.1 7653R|AID30789.1 MAFF303099|WP_010910115.1 USDA_110|WP_011086046.1 113_2|113-2GL006261	cobalamin biosynthesis protein CobW	S
	Core cluster	USDA205|WP_014330138.1 Sm2011|AGG75150.1 7653R|AID33315.1 MAFF303099|WP_080512080.1 USDA_110|WP_038965071.1 113_2|113-2GL000388	Beta-lactamase domain-containing protein	S
	Core cluster	USDA205|WP_037434827.1 Sm2011|AGG71975.1 7653R|AID33472.1 MAFF303099|WP_010912497.1 USDA_110|WP_038966629.1 113_2|113-2GL000780	ABC transporter permease protein	P
	Core cluster	USDA205|WP_037400549.1 Sm2011|AGG69698.1 7653R|AID31374.1 MAFF303099|WP_010910619.1 USDA_110|WP_011086957.1 113_2|113-2GL005284	ABC transporter	S
	Core cluster	USDA205|WP_060563310.1 Sm2011|AGG73821.1 7653R|AID29583.1 MAFF303099|WP_010915631.1 USDA_110|WP_011087731.1 113_2|113-2GL004301	Catalyzes the oxidation of the C8 methyl side group on heme O porphyrin ring into a formyl group (By similarity)	O
	Core cluster	USDA205|WP_153451381.1 Sm2011|AGG72922.1 7653R|AID29387.1 MAFF303099|WP_010915463.1 USDA_110|WP_011090854.1 113_2|113-2GL001044	lysine exporter protein LysE YggA	E
	Core cluster	USDA205|WP_037395479.1 Sm2011|AGG74504.1 7653R|AID34010.1 MAFF303099|WP_010913005.1 USDA_110|WP_011086532.1 113_2|113-2GL005775	Tripartite ATP-independent periplasmic transporter, DctQ	G
	Core cluster	USDA205|WP_014328329.1 Sm2011|AGG74244.1 7653R|AID30130.1 MAFF303099|WP_010909524.1 USDA_110|WP_011087577.1 113_2|113-2GL004478	Anthranilate phosphoribosyltransferase	E
	Core cluster	USDA205|WP_014329854.1 Sm2011|AGG75479.1 7653R|AID33652.2 MAFF303099|WP_010912711.1 USDA_110|WP_038967579.1 113_2|113-2GL004852	Part of the ABC transporter complex MetNIQ involved in methionine import. Responsible for energy coupling to the transport system (By similarity)	P
	Core cluster	USDA205|WP_014328078.1 Sm2011|AGG73960.1 7653R|AID29922.2 MAFF303099|WP_010909289.1 USDA_110|WP_011088131.1 113_2|113-2GL003877	50S ribosomal protein L17	J
	Core cluster	USDA205|WP_014328197.1 Sm2011|AGG74078.1 7653R|AID30155.1 MAFF303099|WP_010909549.1 USDA_110|WP_011087625.1 113_2|113-2GL004424	Catalyzes the condensation of isopentenyl diphosphate (IPP) with allylic pyrophosphates generating different type of terpenoids (By similarity)	I
	Core cluster	USDA205|WP_014327813.1 Sm2011|AGG73700.1 7653R|AID29076.1 MAFF303099|WP_010915147.1 USDA_110|WP_011086577.1 113_2|113-2GL005723	Phosphatidylserine decarboxylase proenzyme	I
	Core cluster	USDA205|WP_037435497.1 Sm2011|AGG71852.1 7653R|AID32579.1 MAFF303099|WP_010911608.1 USDA_110|WP_011090669.1 113_2|113-2GL001141	Phosphonate ABC transporter, periplasmic	P
	Core cluster	USDA205|WP_014330416.1 Sm2011|AGG72629.1 7653R|AID33947.2 MAFF303099|WP_010912945.1 USDA_110|WP_038965755.1 113_2|113-2GL006576	Alkylated D- repair protein	L
	Core cluster	USDA205|WP_014331232.1 Sm2011|AGG72500.1 7653R|AID28551.2 MAFF303099|WP_010914667.1 USDA_110|WP_008567285.1 113_2|113-2GL008204	4-carboxymuconolactone decarboxylase	Q
	Core cluster	USDA205|WP_014328510.1 Sm2011|AGG74400.1 USDA_110|WP_038967752.1 113_2|113-2GL003319 7653R|AID30293.1 MAFF303099|WP_044547694.1	Hpt domain protein	S
	Core cluster	USDA205|WP_037394441.1 Sm2011|AGG75051.1 7653R|AID31036.1 MAFF303099|WP_032930852.1 USDA_110|WP_011086098.1 113_2|113-2GL006208	Binding-protein-dependent transport systems inner membrane component	P
	Core cluster	USDA205|WP_014329215.1 Sm2011|AGG72194.1 7653R|AID27903.1 MAFF303099|WP_010913402.1 USDA_110|WP_011085994.1 113_2|113-2GL006311	ABC transporter	G
	Core cluster	USDA205|WP_014329299.1 Sm2011|AGG75065.1 7653R|AID33792.1 MAFF303099|WP_010912826.1 USDA_110|WP_011084271.1 113_2|113-2GL008125	Urea amidohydrolase subunit beta	E
	Core cluster	USDA205|WP_153451982.1 Sm2011|AGG74727.1 7653R|AID30932.1 MAFF303099|WP_044548000.1 USDA_110|WP_011089298.1 113_2|113-2GL002680	d-lactate dehydrogenase	C
	Core cluster	USDA205|WP_014330595.1 Sm2011|AGG70417.1 7653R|AID34130.1 MAFF303099|WP_010913115.1 USDA_110|WP_038967731.1 113_2|113-2GL005956	ABC transporter permease protein	G
	Core cluster	USDA205|WP_037396470.1 Sm2011|AGG74188.1 7653R|AID30018.2 MAFF303099|WP_010909367.1 USDA_110|WP_051000380.1 113_2|113-2GL004830	rare lipoprotein a	M
	Core cluster	USDA205|WP_012707596.1 Sm2011|AGG73825.1 7653R|AID29591.1 MAFF303099|WP_010915638.1 USDA_110|WP_011087726.1 113_2|113-2GL004308	This protein is one of the early assembly proteins of the 50S ribosomal subunit, although it is not seen to bind rR- by itself. It is important during the early stages of 50S assembly (By similarity)	J
	Core cluster	USDA205|WP_014328332.1 Sm2011|AGG74241.1 7653R|AID30327.1 MAFF303099|WP_010909696.1 USDA_110|WP_011087379.1 113_2|113-2GL004721	Catalyzes the last two sequential reactions in the de novo biosynthetic pathway for UDP-N-acetylglucosamine (UDP- Glc-c). The C-terminal domain catalyzes the transfer of acetyl group from acetyl coenzyme A to glucosamine-1-phosphate (GlcN-1-P) to produce N-acetylglucosamine-1-phosphate (Glc-c-1-P), which is converted into UDP-Glc-c by the transfer of uridine 5- monophosphate (from uridine 5-triph…	M
	Core cluster	USDA205|WP_014328265.1 Sm2011|AGG74125.1 7653R|AID30514.1 MAFF303099|WP_010909869.1 USDA_110|WP_011087709.1 113_2|113-2GL004326	Involved in protein export. Acts as a chaperone by maintaining the newly synthesized protein in an open conformation	O
	Core cluster	USDA205|WP_153451990.1 Sm2011|AGG72804.1 7653R|AID34283.2 MAFF303099|WP_010913278.1 USDA_110|WP_011084238.1 113_2|113-2GL008163	Prephenate dehydratase	E
	Core cluster	USDA205|WP_037396033.1 Sm2011|AGG72189.1 7653R|AID30223.1 MAFF303099|WP_010909606.1 USDA_110|WP_038967763.1 113_2|113-2GL003613	transglutaminase domain protein	E
	Core cluster	USDA205|WP_014330025.1 Sm2011|AGG75613.1 7653R|AID29444.1 MAFF303099|WP_010915520.1 USDA_110|WP_038966160.1 113_2|113-2GL001345	Zinc manganese iron ABC transporter, periplasmic zinc manganese iron-binding protein	P
	Core cluster	USDA205|WP_014329648.1 Sm2011|AGG75312.1 7653R|AID32169.2 MAFF303099|WP_032931468.1 USDA_110|WP_011084979.1 113_2|113-2GL007505	Conserved protein	S
	Core cluster	USDA205|WP_014329612.1 Sm2011|AGG75649.1 USDA_110|WP_011086175.1 113_2|113-2GL006128 7653R|AID28060.1 MAFF303099|WP_010914495.1	ABC transporter (Permease)	G
	Core cluster	USDA205|WP_060563303.1 Sm2011|AGG75426.1 7653R|AID31056.1 MAFF303099|WP_044548075.1 USDA_110|WP_028174014.1 113_2|113-2GL004799	glyoxalase bleomycin resistance protein dioxygenase	S
	Core cluster	USDA205|WP_014328481.1 Sm2011|AGG74365.1 7653R|AID29682.1 MAFF303099|WP_010909092.1 USDA_110|WP_011088461.1 113_2|113-2GL003503	BolA-like protein	T
	Core cluster	USDA205|WP_014330822.1 Sm2011|AGG72946.1 7653R|AID27839.1 MAFF303099|WP_010913343.1 USDA_110|WP_011085820.1 113_2|113-2GL006499	Enoyl-CoA hydratase	I
	Core cluster	USDA205|WP_014329207.1 Sm2011|AGG72186.1 7653R|AID32679.1 MAFF303099|WP_010911705.1 USDA_110|WP_011088069.1 113_2|113-2GL003939	EamA-like transporter family	E, G
	Core cluster	USDA205|WP_037399475.1 Sm2011|AGG73877.1 7653R|AID30333.1 MAFF303099|WP_038647029.1 USDA_110|WP_011087874.1 113_2|113-2GL004157	Nudix hydrolase	L
	Core cluster	USDA205|WP_014330419.1 Sm2011|AGG72632.1 7653R|AID33875.1 MAFF303099|WP_044548702.1 USDA_110|WP_011083481.1 113_2|113-2GL000184	IGPS catalyzes the conversion of PRFAR and glutamine to IGP, AICAR and glutamate. The HisF subunit catalyzes the cyclization activity that produces IGP and AICAR from PRFAR using the ammonia provided by the HisH subunit (By similarity)	E
	Core cluster	USDA205|WP_014329643.1 Sm2011|AGG75308.1 7653R|AID32173.1 MAFF303099|WP_027030743.1 USDA_110|WP_011084990.1 113_2|113-2GL007490	-	-
	Core cluster	USDA205|WP_037391930.1 Sm2011|AGG73112.1 7653R|AID27876.1 MAFF303099|WP_010913378.1 USDA_110|WP_011083979.1 113_2|113-2GL008461	3-hydroxyacyl-COA dehydrogenase	I
	Core cluster	USDA205|WP_037394455.1 Sm2011|AGG75045.1 7653R|AID31043.1 MAFF303099|WP_010910313.1 USDA_110|WP_011085703.1 113_2|113-2GL006620	amidohydrolase	E
	Core cluster	USDA205|WP_014328226.1 Sm2011|AGG74109.1 7653R|AID30538.1 MAFF303099|WP_044547812.1 USDA_110|WP_011087518.1 113_2|113-2GL004543	Part of the twin-arginine translocation (Tat) system that transports large folded proteins containing a characteristic twin-arginine motif in their signal peptide across membranes. Together with TatC, TatB is part of a receptor directly interacting with Tat signal peptides. TatB may form an oligomeric binding site that transiently accommodates folded Tat precursor proteins before their translocat…	U
	Core cluster	USDA205|WP_014329831.1 Sm2011|AGG75458.1 7653R|AID30730.1 MAFF303099|WP_010910059.1 USDA_110|WP_011082924.1 113_2|113-2GL000803	Creatinine amidohydrolase	S
	Dispensable cluster	USDA205|WP_014328767.1 Sm2011|AGG74600.1 7653R|AID29268.2 MAFF303099|WP_010915310.1 Sm2011|AGG71505.1 MAFF303099|WP_048894846.1	Protein of unknown function (DUF1515)	S
	Core cluster	USDA205|WP_014328867.1 Sm2011|AGG74669.1 7653R|AID29962.2 MAFF303099|WP_044550385.1 USDA_110|WP_038965243.1 113_2|113-2GL008581	#NAME?	C
	Core cluster	USDA205|WP_037394104.1 Sm2011|AGG75516.1 7653R|AID30913.1 MAFF303099|WP_010910186.1 USDA_110|WP_011090881.1 113_2|113-2GL001013	ABC transporter, periplasmic molybdate-binding protein	P
	Core cluster	USDA205|WP_153451789.1 Sm2011|AGG73236.1 7653R|AID32239.1 MAFF303099|WP_010911270.1 USDA_110|WP_011089622.1 113_2|113-2GL002331	flagellar basal body rod protein	N
	Core cluster	USDA205|WP_060563695.1 Sm2011|AGG72324.1 7653R|AID28266.2 MAFF303099|WP_044549434.1 USDA_110|WP_038966639.1 113_2|113-2GL000742	)transporter	G
	Core cluster	USDA205|WP_014330763.1 Sm2011|AGG72915.1 7653R|AID34343.1 MAFF303099|WP_010913340.1 USDA_110|WP_011083651.1 113_2|113-2GL000002	D- polymerase III is a complex, multichain enzyme responsible for most of the replicative synthesis in bacteria. This D- polymerase also exhibits 3' to 5' exonuclease activity. The beta chain is required for initiation of replication once it is clamped onto D-, it slides freely (bidirectional and ATP- independent) along duplex D- (By similarity)	L
	Core cluster	USDA205|WP_037393616.1 Sm2011|AGG75356.1 7653R|AID32901.1 MAFF303099|WP_010911922.1 USDA_110|WP_011084338.1 113_2|113-2GL008058	phosphoglycerate kinase	G
	Core cluster	USDA205|WP_003507767.1 Sm2011|AGG73934.1 7653R|AID29896.1 MAFF303099|WP_010909272.1 USDA_110|WP_002712302.1 113_2|113-2GL003851	tR- binding	J
	Core cluster	USDA205|WP_037394698.1 Sm2011|AGG75221.1 7653R|AID32669.1 MAFF303099|WP_044548344.1 USDA_110|WP_038965385.1 113_2|113-2GL008089	Polysaccharide biosynthesis protein	M
	Core cluster	USDA205|WP_080577418.1 Sm2011|AGG75109.1 7653R|AID30504.2 MAFF303099|WP_010909860.1 USDA_110|WP_011086565.1 113_2|113-2GL005736	cytochrome c oxidase subunit I	C
	Core cluster	USDA205|WP_037392692.1 Sm2011|AGG73439.1 7653R|AID32067.2 MAFF303099|WP_080511841.1 USDA_110|WP_038965428.1 113_2|113-2GL001751	Major facilitator superfamily MFS_1	G
	Core cluster	USDA205|WP_037398213.1 Sm2011|AGG72591.1 7653R|AID33497.1 MAFF303099|WP_010912518.1 USDA_110|WP_011083471.1 113_2|113-2GL000194	Smr protein MutS2	S
	Core cluster	USDA205|WP_060563645.1 Sm2011|AGG72507.1 7653R|AID27946.1 MAFF303099|WP_010913446.1 USDA_110|WP_038965496.1 113_2|113-2GL002039	Gamma-glutamyltranspeptidase (EC 2.3.2.2)	E
	Core cluster	USDA205|WP_014328160.1 Sm2011|AGG74039.1 7653R|AID29990.2 MAFF303099|WP_044547561.1 USDA_110|WP_038967572.1 113_2|113-2GL004864	nitrogen regulation protein ntrY	T
	Core cluster	USDA205|WP_037428405.1 Sm2011|AGG72455.1 7653R|AID30655.1 MAFF303099|WP_010909987.1 USDA_110|WP_011086734.1 113_2|113-2GL005532	3-hydroxyisobutyrate dehydrogenase	I
	Core cluster	USDA205|WP_037396073.1 Sm2011|AGG74994.1 7653R|AID32165.1 MAFF303099|WP_044548283.1 USDA_110|WP_011090865.1 113_2|113-2GL001032	pyridoxamine 5'-phosphate oxidase-related, FMN-binding	P
	Core cluster	USDA205|WP_037430519.1 Sm2011|AGG71851.1 7653R|AID32580.2 MAFF303099|WP_010911609.1 USDA_110|WP_011090668.1 113_2|113-2GL001142	Phosphonate ABC transporter	P
	Core cluster	USDA205|WP_037400427.1 Sm2011|AGG74004.1 7653R|AID30393.1 MAFF303099|WP_010909755.1 USDA_110|WP_049832605.1 113_2|113-2GL003698	Threonyl-tR- synthetase	J
	Core cluster	USDA205|WP_014329140.1 Sm2011|AGG74958.1 7653R|AID32106.1 MAFF303099|WP_010911140.1 USDA_110|WP_011085251.1 113_2|113-2GL007158	Protein of unknown function DUF58	S
	Core cluster	USDA205|WP_037394683.1 Sm2011|AGG75242.1 7653R|AID32705.1 MAFF303099|WP_010911731.1 USDA_110|WP_028173542.1 113_2|113-2GL008205	-	-
	Core cluster	USDA205|WP_037393354.1 Sm2011|AGG74300.1 7653R|AID29206.1 MAFF303099|WP_044549950.1 USDA_110|WP_028171332.1 113_2|113-2GL004947	etc complex i subunit conserved region	C
	Core cluster	USDA205|WP_037396552.1 Sm2011|AGG74394.1 7653R|AID30286.1 MAFF303099|WP_010909657.1 USDA_110|WP_011085841.1 113_2|113-2GL006477	2-amino-4-hydroxy-6-hydroxymethyldihydropteridine pyrophosphokinase	H
	Core cluster	USDA205|WP_037394047.1 Sm2011|AGG75513.1 7653R|AID30791.1 MAFF303099|WP_010910117.1 USDA_110|WP_011086048.1 113_2|113-2GL006258	Precorrin-3B synthase	H
	Core cluster	USDA205|WP_014327722.1 Sm2011|AGG73593.1 7653R|AID28970.1 MAFF303099|WP_010915044.1 USDA_110|WP_011085905.1 113_2|113-2GL006407	Two component transcriptional regulator, winged helix family	T
	Core cluster	USDA205|WP_037396962.1 Sm2011|AGG74766.1 7653R|QGU20731.1 MAFF303099|WP_010910254.1 USDA_110|WP_011089342.1 113_2|113-2GL002629	Cell wall formation. Catalyzes the transfer of a Glc-c subunit on undecaprenyl-pyrophosphoryl-Mur-c-pentapeptide (lipid intermediate I) to form undecaprenyl-pyrophosphoryl-Mur-c- (pentapeptide)Glc-c (lipid intermediate II) (By similarity)	M
	Core cluster	USDA205|WP_153451534.1 Sm2011|AGG74066.1 7653R|AID30172.1 MAFF303099|WP_010909564.1 USDA_110|WP_011087911.1 113_2|113-2GL004112	ATP-dependent CLP protease ATP-binding subunit	O
	Core cluster	USDA205|WP_060563457.1 Sm2011|AGG73263.1 7653R|AID32267.1 MAFF303099|WP_010911296.1 USDA_110|WP_011089592.1 113_2|113-2GL002361	Has a post-transcriptional repressor function in flagellum biogenesis. Associates with the 5'-UTR of fljK mR- and promotes its degradation (By similarity)	N
	Core cluster	USDA205|WP_014329217.1 Sm2011|AGG72196.1 7653R|AID27905.1 MAFF303099|WP_010913404.1 USDA_110|WP_011085992.1 113_2|113-2GL006313	ABC transporter	G
	Core cluster	USDA205|WP_153451460.1 Sm2011|AGG74529.1 7653R|AID30631.1 MAFF303099|WP_010909964.1 USDA_110|WP_007592476.1 113_2|113-2GL005706	acyl carrier protein	I, Q
	Core cluster	USDA205|WP_037398325.1 Sm2011|AGG72726.1 7653R|AID27855.1 MAFF303099|WP_010913357.1 USDA_110|WP_028173506.1 113_2|113-2GL008147	type II secretion system protein	U
	Core cluster	USDA205|WP_037393325.1 Sm2011|AGG72094.1 7653R|AID34114.1 MAFF303099|WP_010913094.1 USDA_110|WP_028174309.1 113_2|113-2GL007279	Exopolysaccharide	M
	Core cluster	USDA205|WP_014328070.1 Sm2011|AGG73948.1 7653R|AID29910.1 MAFF303099|WP_010909282.1 USDA_110|WP_011088140.1 113_2|113-2GL003865	Binds 16S rR-, required for the assembly of 30S particles and may also be responsible for determining the conformation of the 16S rR- at the A site (By similarity)	J
	Core cluster	USDA205|WP_014330520.1 Sm2011|AGG72735.1 7653R|AID34277.1 MAFF303099|WP_044548852.1 USDA_110|WP_028173513.1 113_2|113-2GL008157	Binding-protein-dependent transport systems inner membrane component	P
	Core cluster	USDA205|WP_037394406.1 Sm2011|AGG75068.1 7653R|AID33796.1 MAFF303099|WP_010912830.1 USDA_110|WP_011084270.1 113_2|113-2GL008127	Required for maturation of urease via the functional incorporation of the urease nickel metallocenter (By similarity)	O
	Core cluster	USDA205|WP_014328003.1 Sm2011|AGG73867.1 7653R|AID30765.1 MAFF303099|WP_010910091.1 USDA_110|WP_011087643.1 113_2|113-2GL004401	Lipoprotein releasing system transmembrane protein	M
	Core cluster	USDA205|WP_037436024.1 Sm2011|AGG73656.1 7653R|AID31469.1 MAFF303099|WP_010910717.1 USDA_110|WP_011085871.1 113_2|113-2GL006445	Transcriptional regulator, arsR family	K
	Core cluster	USDA205|WP_037393411.1 Sm2011|AGG74115.1 7653R|AID30533.1 MAFF303099|WP_010909886.1 USDA_110|WP_011087511.1 113_2|113-2GL004550	peptidase	M
	Core cluster	USDA205|WP_037398395.1 Sm2011|AGG70951.1 7653R|AID29187.1 MAFF303099|WP_010915237.1 USDA_110|WP_011088241.1 113_2|113-2GL003751	Helicase	L
	Core cluster	USDA205|WP_014329641.1 Sm2011|AGG75304.1 7653R|AID32178.1 MAFF303099|WP_044548285.1 USDA_110|WP_011089733.1 113_2|113-2GL002219	Catalyzes the 2-thiolation of uridine at the wobble position (U34) of tR-, leading to the formation of s(2)U34 (By similarity)	J
	Core cluster	USDA205|WP_060564019.1 Sm2011|AGG73723.1 7653R|AID29112.1 MAFF303099|WP_010915173.1 USDA_110|WP_011086859.1 113_2|113-2GL005394	Catalyzes the condensation reaction of fatty acid synthesis by the addition to an acyl acceptor of two carbons from malonyl-ACP (By similarity)	I
	Core cluster	USDA205|WP_037397337.1 Sm2011|AGG72886.1 7653R|AID28724.1 MAFF303099|WP_010914813.1 USDA_110|WP_038967551.1 113_2|113-2GL005449	Arsenate reductase-like protein	P
	Core cluster	USDA205|WP_014330417.1 Sm2011|AGG72630.1 7653R|AID33877.1 MAFF303099|WP_010912883.1 USDA_110|WP_027543772.1 113_2|113-2GL000182	Pantothenic acid kinase	H
	Core cluster	USDA205|WP_080577626.1 Sm2011|AGG74141.1 7653R|AID32939.1 MAFF303099|WP_032932026.1 USDA_110|WP_038966374.1 113_2|113-2GL004131	Lytic transglycosylase catalytic	M
	Core cluster	USDA205|WP_014330009.1 Sm2011|AGG75594.1 7653R|AID34205.1 MAFF303099|WP_010913189.1 USDA_110|WP_038965706.1 113_2|113-2GL006394	formate dehydrogenase, delta subunit	C
	Core cluster	USDA205|WP_037393886.1 Sm2011|AGG75837.1 7653R|AID33319.2 MAFF303099|WP_010912347.1 USDA_110|WP_011083307.1 113_2|113-2GL000392	MiaB-like tR- modifying enzyme	J
	Core cluster	USDA205|WP_037393568.1 Sm2011|AGG75387.1 7653R|AID32322.2 MAFF303099|WP_010911341.1 USDA_110|WP_011089865.1 113_2|113-2GL002069	Oligoendopeptidase f	E
	Core cluster	USDA205|WP_014330176.1 Sm2011|AGG75862.1 7653R|AID32982.1 MAFF303099|WP_032933839.1 USDA_110|WP_011083059.1 113_2|113-2GL000661	synthesis repressor	S
	Core cluster	USDA205|WP_153451897.1 Sm2011|AGG72611.1 7653R|AID33925.1 MAFF303099|WP_010912925.1 USDA_110|WP_011083571.1 113_2|113-2GL000086	Component of the acetyl coenzyme A carboxylase (ACC) complex. Biotin carboxylase (BC) catalyzes the carboxylation of biotin on its carrier protein (BCCP) and then the CO(2) group is transferred by the transcarboxylase to acetyl-CoA to form malonyl- CoA (By similarity)	I
	Core cluster	USDA205|WP_014330099.1 Sm2011|AGG75766.1 7653R|AID33099.1 MAFF303099|WP_010912106.1 USDA_110|WP_011083268.1 113_2|113-2GL000435	Accelerates the degradation of transcripts by removing pyrophosphate from the 5'-end of triphosphorylated R-, leading to a more labile monophosphorylated state that can stimulate subsequent ribonuclease cleavage (By similarity)	J
	Core cluster	USDA205|WP_037436034.1 Sm2011|AGG72024.1 7653R|AID31464.1 MAFF303099|WP_010910712.1 USDA_110|WP_011087808.1 113_2|113-2GL004229	Major facilitator superfamily	G
	Core cluster	USDA205|WP_014330764.1 Sm2011|AGG72916.1 7653R|AID33562.2 MAFF303099|WP_044548561.1 USDA_110|WP_011083497.1 113_2|113-2GL000168	Catalyzes the 2'-O-methylation of the ribose of cytidine 1402 (C1402) in 16S rR- (By similarity)	S
	Core cluster	USDA205|WP_037392709.1 Sm2011|AGG73429.1 7653R|AID28760.2 MAFF303099|WP_164986996.1 USDA_110|WP_011085322.1 113_2|113-2GL007077	glycyl-tR- synthetase alpha subunit	J
	Core cluster	USDA205|WP_014330079.1 Sm2011|AGG75776.1 7653R|AID33387.1 MAFF303099|WP_010912411.1 USDA_110|WP_011083326.1 113_2|113-2GL000371	Catalyzes the isomerization between 2-isopropylmalate and 3-isopropylmalate, via the formation of 2-isopropylmaleate (By similarity)	E
	Core cluster	USDA205|WP_060563206.1 Sm2011|AGG71842.1 7653R|AID29451.1 MAFF303099|WP_010915527.1 USDA_110|WP_011088982.1 113_2|113-2GL002938	Histidine ammonia-lyase	E
	Core cluster	USDA205|WP_080577395.1 Sm2011|AGG75826.1 7653R|AID33336.2 MAFF303099|WP_044551033.1 USDA_110|WP_011083295.1 113_2|113-2GL000404	Protein of unknown function (DUF2794)	S
	Core cluster	USDA205|WP_037396569.1 Sm2011|AGG74396.1 7653R|QGU20802.1 MAFF303099|WP_010909659.1 USDA_110|WP_028172291.1 113_2|113-2GL006475	dihydropteroate synthase	H
	Core cluster	USDA205|WP_037393490.1 Sm2011|AGG74035.1 7653R|AID29986.2 MAFF303099|WP_010909341.1 USDA_110|WP_011087257.1 113_2|113-2GL004869	Bifunctional enzyme that catalyzes the formation of 4- diphosphocytidyl-2-C-methyl-D-erythritol from CTP and 2-C-methyl- D-erythritol 4-phosphate (MEP) (IspD), and catalyzes the conversion of 4-diphosphocytidyl-2-C-methyl-D-erythritol 2- phosphate (CDP-ME2P) to 2-C-methyl-D-erythritol 2,4- cyclodiphosphate (ME-CPP) with a corresponding release of cytidine 5-monophosphate (CMP) (IspF) (By similari…	I
	Core cluster	USDA205|WP_014328007.1 Sm2011|AGG73869.1 7653R|AID30356.1 MAFF303099|WP_010909720.1 USDA_110|WP_011087634.1 113_2|113-2GL004414	D- polymerase III subunit alpha	L
	Core cluster	USDA205|WP_012710091.1 Sm2011|AGG72864.1 7653R|AID33912.1 MAFF303099|WP_006201247.1 USDA_110|WP_011083533.1 113_2|113-2GL000129	Binds directly to 23S ribosomal R- and is necessary for the in vitro assembly process of the 50S ribosomal subunit. It is not involved in the protein synthesizing functions of that subunit (By similarity)	J
	Core cluster	USDA205|WP_014327456.1 Sm2011|AGG73337.1 7653R|AID29481.1 MAFF303099|WP_010915549.1 USDA_110|WP_011086747.1 113_2|113-2GL005518	Specifically methylates the uridine in position 2552 of 23S rR- at the 2'-O position of the ribose in the fully assembled 50S ribosomal subunit (By similarity)	J
	Core cluster	USDA205|WP_037398321.1 Sm2011|AGG72732.1 7653R|AID27860.1 MAFF303099|WP_044551174.1 USDA_110|WP_011084247.1 113_2|113-2GL008152	nlp p60 protein	M
	Core cluster	USDA205|WP_080577652.1 Sm2011|AGG72723.1 7653R|AID27852.2 MAFF303099|WP_044548883.1 USDA_110|WP_011084255.1 113_2|113-2GL008144	Pilus Caulobacter type biogenesis lipoprotein CpaD	N
	Core cluster	USDA205|WP_037431955.1 Sm2011|AGG71743.1 7653R|AID28871.2 MAFF303099|WP_044551549.1 USDA_110|WP_038967811.1 113_2|113-2GL007503	3',2',5'-bisphosphate nucleotidase	P
	Core cluster	USDA205|WP_014328195.1 Sm2011|AGG74076.1 7653R|AID30157.1 MAFF303099|WP_010909551.1 USDA_110|WP_027545778.1 113_2|113-2GL004422	Catalyzes the reversible phosphorylation of UMP to UDP (By similarity)	F
	Core cluster	USDA205|WP_037395250.1 Sm2011|AGG73296.1 7653R|AID28048.1 MAFF303099|WP_010914121.1 USDA_110|WP_011089841.1 113_2|113-2GL002096	Binding-protein-dependent transport systems inner membrane component	P
	Core cluster	USDA205|WP_153451673.1 Sm2011|AGG75483.1 7653R|AID33890.1 MAFF303099|WP_010912894.1 USDA_110|WP_011083939.1 113_2|113-2GL008504	xylose isomerase	G
	Core cluster	USDA205|WP_014327539.1 Sm2011|AGG73427.1 7653R|AID28751.1 MAFF303099|WP_010914836.1 USDA_110|WP_011085321.1 113_2|113-2GL007079	peptidase	O, U
	Core cluster	USDA205|WP_014329256.1 Sm2011|AGG75021.1 7653R|AID30613.1 MAFF303099|WP_044547855.1 USDA_110|WP_011089814.1 113_2|113-2GL002121	Periplasmic binding protein	P
	Core cluster	USDA205|WP_037433700.1 Sm2011|AGG74163.1 7653R|AID30235.1 MAFF303099|WP_010909617.1 USDA_110|WP_011087462.1 113_2|113-2GL004622	Reversibly transfers an adenylyl group from ATP to 4'- phosphopantetheine, yielding dephospho-CoA (dPCoA) and pyrophosphate (By similarity)	H
	Core cluster	USDA205|WP_037400736.1 Sm2011|AGG75865.1 7653R|AID32932.1 MAFF303099|WP_044548376.1 USDA_110|WP_028172627.1 113_2|113-2GL008694	Monofunctional biosynthetic peptidoglycan transglycosylase	M
	Core cluster	USDA205|WP_037395144.1 Sm2011|AGG73331.1 7653R|AID31269.2 MAFF303099|WP_044550670.1 USDA_110|WP_038966417.1 113_2|113-2GL002589	-	-
	Core cluster	USDA205|WP_014329754.1 Sm2011|AGG75380.1 7653R|AID32960.1 MAFF303099|WP_010911972.1 USDA_110|WP_011089873.1 113_2|113-2GL002061	Pyruvate kinase	G
	Core cluster	USDA205|WP_037435499.1 Sm2011|AGG71858.1 7653R|AID31030.2 MAFF303099|WP_010910300.1 USDA_110|WP_011088207.1 113_2|113-2GL003792	L-carnitine dehydratase bile acid-inducible protein F	C
	Core cluster	USDA205|WP_037400463.1 Sm2011|AGG74016.1 USDA_110|WP_011088447.1 7653R|AID33905.1 MAFF303099|WP_010912907.1 113_2|113-2GL003517	Cytochrome B561	C
	Core cluster	USDA205|WP_060564123.1 Sm2011|AGG74098.1 7653R|AID30549.1 MAFF303099|WP_010909901.1 USDA_110|WP_038967248.1 113_2|113-2GL004532	Exodeoxyribonuclease III	L
	Core cluster	USDA205|WP_037430433.1 Sm2011|AGG71817.1 7653R|AID29617.1 MAFF303099|WP_010915661.1 USDA_110|WP_011088641.1 113_2|113-2GL003305	RbsD or FucU transport	G
	Core cluster	USDA205|WP_014327977.1 Sm2011|AGG73837.1 7653R|AID29606.1 MAFF303099|WP_027046751.1 USDA_110|WP_011087707.1 113_2|113-2GL004330	ATP-dependent serine protease that mediates the selective degradation of mutant and abnormal proteins as well as certain short-lived regulatory proteins. Required for cellular homeostasis and for survival from D- damage and developmental changes induced by stress. Degrades polypeptides processively to yield small peptide fragments that are 5 to 10 amino acids long. Binds to D- in a double-strande…	O
	Core cluster	USDA205|WP_014329133.1 Sm2011|AGG74950.1 7653R|AID32077.2 MAFF303099|WP_010911113.1 USDA_110|WP_038967283.1 113_2|113-2GL001708	MaoC domain protein dehydratase	I
	Core cluster	USDA205|WP_037394722.1 Sm2011|AGG75237.1 7653R|AID32687.1 MAFF303099|WP_010911713.1 USDA_110|WP_011084197.1 113_2|113-2GL008213	3-hydroxybutyryl-CoA dehydrogenase	I
	Core cluster	USDA205|WP_014330670.1 Sm2011|AGG72827.1 7653R|AID34334.1 MAFF303099|WP_010913331.1 USDA_110|WP_011083592.1 113_2|113-2GL000063	Catalyzes the condensation reaction of fatty acid synthesis by the addition to an acyl acceptor of two carbons from malonyl-ACP (By similarity)	I
	Core cluster	USDA205|WP_014329523.1 Sm2011|AGG75218.1 7653R|AID32667.1 MAFF303099|WP_010911694.1 USDA_110|WP_028175805.1 113_2|113-2GL000684	Peptidyl-prolyl cis-trans isomerase	O
	Core cluster	USDA205|WP_037396735.1 Sm2011|AGG74936.1 7653R|AID32060.1 MAFF303099|WP_010911098.1 USDA_110|WP_011090179.1 113_2|113-2GL001701	ATP synthase beta subunit transription termination factor rho	S
	Core cluster	USDA205|WP_014330669.1 Sm2011|AGG72826.1 7653R|AID34333.1 MAFF303099|WP_010913330.1 USDA_110|WP_011083593.1 113_2|113-2GL000062	Enoyl- acyl-carrier-protein reductase -DH	I
	Core cluster	USDA205|WP_037396502.1 Sm2011|AGG74359.1 7653R|QGU20844.1 MAFF303099|WP_010909101.1 USDA_110|WP_011088468.1 113_2|113-2GL003493	Phosphoribosylformylglycinamidine synthase I	F
	Core cluster	USDA205|WP_037393361.1 Sm2011|AGG74306.1 7653R|AID30477.1 MAFF303099|WP_010909769.1 USDA_110|WP_011087134.1 113_2|113-2GL005078	homoserine dehydrogenase	E
	Core cluster	USDA205|WP_037392749.1 Sm2011|AGG74243.1 7653R|AID30129.1 MAFF303099|WP_010909523.1 USDA_110|WP_011087576.1 113_2|113-2GL004479	Peptidyl-prolyl cis-trans isomerase	O
	Core cluster	USDA205|WP_014329180.1 Sm2011|AGG72129.1 7653R|AID28733.1 MAFF303099|WP_010914820.1 USDA_110|WP_011086826.1 113_2|113-2GL005433	Pfam:DUF2133	S
	Core cluster	USDA205|WP_037394693.1 Sm2011|AGG75233.1 7653R|AID32683.1 MAFF303099|WP_010911709.1 USDA_110|WP_011084194.1 113_2|113-2GL008216	adenosyltransferase	S
	Core cluster	USDA205|WP_050984168.1 Sm2011|AGG71412.1 7653R|AID28476.1 MAFF303099|WP_010914601.1 USDA_110|WP_038967748.1 113_2|113-2GL003346	Transcriptional regulator, gntR family	K
	Core cluster	USDA205|WP_014330127.1 Sm2011|AGG75662.1 7653R|AID33252.1 MAFF303099|WP_010912277.1 USDA_110|WP_028174950.1 113_2|113-2GL000273	Pfam:DUF55	S
	Core cluster	USDA205|WP_037401901.1 Sm2011|AGG74255.1 7653R|AID30043.1 MAFF303099|WP_010909435.1 USDA_110|WP_011088878.1 113_2|113-2GL003054	quinone oxidoreductase	C
	Core cluster	USDA205|WP_014328193.1 Sm2011|AGG74074.1 7653R|AID30162.1 MAFF303099|WP_010909556.1 USDA_110|WP_011087629.1 113_2|113-2GL004420	30S ribosomal protein S2	J
	Core cluster	USDA205|WP_037392928.1 Sm2011|AGG74344.1 7653R|AID29698.1 MAFF303099|WP_010909109.1 USDA_110|WP_011088436.1 113_2|113-2GL003530	adenylosuccinate lyase	F
	Core cluster	USDA205|WP_037393442.1 Sm2011|AGG74086.1 7653R|AID30147.1 MAFF303099|WP_010909540.1 USDA_110|WP_011087615.1 113_2|113-2GL004435	Condensation of UDP-2,3-diacylglucosamine and 2,3- diacylglucosamine-1-phosphate to form lipid A disaccharide, a precursor of lipid A, a phosphorylated glycolipid that anchors the lipopolysaccharide to the outer membrane of the cell (By similarity)	M
	Core cluster	USDA205|WP_060563983.1 Sm2011|AGG73352.1 7653R|AID28311.2 MAFF303099|WP_010914412.1 USDA_110|WP_038967316.1 113_2|113-2GL001622	Specifically methylates the N3 position of the uracil ring of uridine 1498 (m3U1498) in 16S rR-. Acts on the fully assembled 30S ribosomal subunit (By similarity)	S
	Core cluster	USDA205|WP_037391120.1 Sm2011|AGG73751.1 7653R|AID29157.1 MAFF303099|WP_010915213.1 USDA_110|WP_011090204.1 113_2|113-2GL001676	cdp-diacylglycerol--glycerol-3-phosphate 3-phosphatidyltransferase	I
	Core cluster	USDA205|WP_037399512.1 Sm2011|AGG73391.1 7653R|AID29413.1 MAFF303099|WP_010915489.1 USDA_110|WP_011090246.1 113_2|113-2GL001631	Transfers the gamma-phosphate of ATP to the 4'-position of a tetraacyldisaccharide 1-phosphate intermediate (termed DS-1- P) to form tetraacyldisaccharide 1,4'-bis-phosphate (lipid IVA) (By similarity)	M
	Core cluster	USDA205|WP_037391175.1 Sm2011|AGG73688.1 7653R|AID29055.1 MAFF303099|WP_044549833.1 USDA_110|WP_011085350.1 113_2|113-2GL007045	Uncharacterised ACR, COG2135	S
	Core cluster	USDA205|WP_037435264.1 Sm2011|AGG74117.1 7653R|AID30529.1 MAFF303099|WP_010909882.1 USDA_110|WP_011087504.1 113_2|113-2GL004557	Preprotein translocase YajC subunit	U
	Core cluster	USDA205|WP_153451232.1 Sm2011|AGG70758.1 7653R|AID30344.1 MAFF303099|WP_044550507.1 USDA_110|WP_011088844.1 113_2|113-2GL003095	monooxygenase	C, H
	Core cluster	USDA205|WP_153451636.1 Sm2011|AGG73797.1 7653R|AID29538.2 MAFF303099|WP_032929891.1 USDA_110|WP_011087789.1 113_2|113-2GL004255	Involved in the transcription termination process (By similarity)	K
	Core cluster	USDA205|WP_014328150.1 Sm2011|AGG74029.1 7653R|AID29983.1 MAFF303099|WP_010909336.1 USDA_110|WP_011087546.1 113_2|113-2GL004512	Dihydrolipoyl dehydrogenase	C
	Core cluster	USDA205|WP_014327529.1 Sm2011|AGG70950.1 7653R|AID31365.1 MAFF303099|WP_010910615.1 USDA_110|WP_038966404.1 113_2|113-2GL002566	Glutathione S-Transferase	O
	Core cluster	USDA205|WP_014327814.1 Sm2011|AGG73701.1 7653R|AID29078.1 MAFF303099|WP_032929550.1 USDA_110|WP_011086578.1 113_2|113-2GL005722	CDP-diacylglycerol--serine O-phosphatidyltransferase	I
	Core cluster	USDA205|WP_014329096.1 Sm2011|AGG74931.1 7653R|AID32053.1 MAFF303099|WP_010911093.1 USDA_110|WP_011086810.1 113_2|113-2GL005450	Chaperone CsaA	J
	Core cluster	USDA205|WP_037396037.1 Sm2011|AGG72181.1 7653R|AID29946.1 MAFF303099|WP_044547546.1 USDA_110|WP_011084264.1 113_2|113-2GL008134	Helicase	L
	Core cluster	USDA205|WP_037394665.1 Sm2011|AGG75254.1 7653R|AID32726.2 MAFF303099|WP_010911752.1 USDA_110|WP_011084214.1 113_2|113-2GL008193	Imidazole acetol-phosphate transaminase	E
	Core cluster	USDA205|WP_014327706.1 Sm2011|AGG73579.1 7653R|AID28940.1 MAFF303099|WP_010915015.1 USDA_110|WP_011085853.1 113_2|113-2GL006465	Fe-S metabolism associated	S
	Core cluster	USDA205|WP_037396760.1 Sm2011|AGG74911.1 7653R|AID31910.1 MAFF303099|WP_010910960.1 USDA_110|WP_011090104.1 113_2|113-2GL001793	gatB Yqey	S
	Core cluster	USDA205|WP_014328406.1 Sm2011|AGG74318.1 7653R|AID29652.1 MAFF303099|WP_010909066.1 USDA_110|WP_028171266.1 113_2|113-2GL005104	feS assembly ATPase SufC	O
	Core cluster	USDA205|WP_014328926.1 Sm2011|AGG74734.1 7653R|AID28759.1 MAFF303099|WP_010914843.1 USDA_110|WP_011090156.1 113_2|113-2GL001733	#NAME?	S
	Core cluster	USDA205|WP_014329188.1 Sm2011|AGG72140.1 7653R|AID31555.2 MAFF303099|WP_010910781.1 USDA_110|WP_011089489.1 113_2|113-2GL002474	Transcriptional regulator, ARSR family	K
	Core cluster	USDA205|WP_037393599.1 Sm2011|AGG75368.1 7653R|AID33045.2 MAFF303099|WP_032933843.1 USDA_110|WP_038965387.1 113_2|113-2GL008069	motA TolQ ExbB proton channel family	S
	Core cluster	USDA205|WP_080578988.1 Sm2011|AGG72460.1 7653R|AID30357.1 MAFF303099|WP_010909721.1 USDA_110|WP_011088023.1 113_2|113-2GL003987	carboxylase, alpha	I
	Core cluster	USDA205|WP_012707461.1 Sm2011|AGG73716.1 7653R|AID29105.1 MAFF303099|WP_006203718.1 USDA_110|WP_007592020.1 113_2|113-2GL005402	Binds as a heterodimer with protein S6 to the central domain of the 16S rR-, where it helps stabilize the platform of the 30S subunit (By similarity)	J
	Core cluster	USDA205|WP_014327113.1 Sm2011|AGG73024.1 7653R|AID33684.1 MAFF303099|WP_010912724.1 USDA_110|WP_038966085.1 113_2|113-2GL001078	Required for the insertion and or proper folding and or complex formation of integral membrane proteins into the membrane. Involved in integration of membrane proteins that insert both dependently and independently of the Sec translocase complex, as well as at least some lipoproteins. Aids folding of multispanning membrane proteins (By similarity)	U
	Core cluster	USDA205|WP_014327768.1 Sm2011|AGG73644.1 7653R|AID29026.1 MAFF303099|WP_010915098.1 USDA_110|WP_011087826.1 113_2|113-2GL004207	In eubacteria ppGpp (guanosine 3'-diphosphate 5-' diphosphate) is a mediator of the stringent response that coordinates a variety of cellular activities in response to changes in nutritional abundance (By similarity)	F
	Core cluster	USDA205|WP_153451692.1 Sm2011|AGG73499.1 7653R|AID28825.2 MAFF303099|WP_010914908.1 USDA_110|WP_063921382.1 113_2|113-2GL008439	Threonine synthase	E
	Core cluster	USDA205|WP_080577406.1 Sm2011|AGG75508.1 7653R|AID30796.2 MAFF303099|WP_010910122.1 USDA_110|WP_011086053.1 113_2|113-2GL006253	precorrin-6y C5,15-methyltransferase	H
	Core cluster	USDA205|WP_014329704.1 Sm2011|AGG75329.1 7653R|AID33018.1 MAFF303099|WP_010912025.1 USDA_110|WP_011089884.1 113_2|113-2GL002049	Peptidoglycan-associated lipoprotein	M
	Core cluster	USDA205|WP_060563432.1 Sm2011|AGG72903.1 7653R|AID28344.1 MAFF303099|WP_010914442.1 USDA_110|WP_011086762.1 113_2|113-2GL005502	Fmu (Sun) domain protein	J
	Core cluster	USDA205|WP_037431979.1 Sm2011|AGG71724.1 7653R|AID31075.1 MAFF303099|WP_010910343.1 USDA_110|WP_011084300.1 113_2|113-2GL008095	sulfate ABC transporter	P
	Core cluster	USDA205|WP_037391892.1 Sm2011|AGG73089.1 7653R|AID27887.1 MAFF303099|WP_010913389.1 USDA_110|WP_011083910.1 113_2|113-2GL008536	Histidine kinase	T
	Core cluster	USDA205|WP_014328498.1 Sm2011|AGG74384.1 7653R|AID29662.2 MAFF303099|WP_010909075.1 USDA_110|WP_011088499.1 113_2|113-2GL003461	Can catalyze the hydrolysis of ATP in the presence of single-stranded D-, the ATP-dependent uptake of single-stranded D- by duplex D-, and the ATP-dependent hybridization of homologous single-stranded D-s. It interacts with LexA causing its activation and leading to its autocatalytic cleavage (By similarity)	L
	Core cluster	USDA205|WP_037401177.1 Sm2011|AGG73339.1 7653R|AID29482.1 MAFF303099|WP_010915550.1 USDA_110|WP_011086748.1 113_2|113-2GL005517	Major facilitator superfamily MFS_1	P
	Core cluster	USDA205|WP_153451427.1 Sm2011|AGG74404.1 7653R|AID32084.1 MAFF303099|WP_010911121.1 USDA_110|WP_011085272.1 113_2|113-2GL007134	Component of the ubiquinol-cytochrome c reductase complex (complex III or cytochrome b-c1 complex), which is a respiratory chain that generates an electrochemical potential coupled to ATP synthesis (By similarity)	C
	Core cluster	USDA205|WP_037428806.1 Sm2011|AGG71031.1 7653R|AID28285.1 MAFF303099|WP_010914386.1 USDA_110|WP_011090536.1 113_2|113-2GL001298	R- Polymerase	K
	Core cluster	USDA205|WP_037395201.1 Sm2011|AGG73318.1 MAFF303099|WP_032933935.1 USDA_110|WP_028173484.1 113_2|113-2GL008113 7653R|AID33733.2	Membrane	S
	Core cluster	USDA205|WP_037393857.1 Sm2011|AGG75666.1 7653R|AID33248.2 MAFF303099|WP_010912273.1 USDA_110|WP_038967375.1 113_2|113-2GL007236	Tetrapolymerization of the monopyrrole PBG into the hydroxymethylbilane pre-uroporphyrinogen in several discrete steps (By similarity)	H
	Core cluster	USDA205|WP_014328961.1 Sm2011|AGG74778.1 7653R|AID30995.1 MAFF303099|WP_010910265.1 USDA_110|WP_039185808.1 113_2|113-2GL002620	N-acetylmuramoyl-L-alanine amidase	M
	Dispensable cluster	USDA205|WP_014329321.1 Sm2011|AGG75086.1 MAFF303099|WP_010909357.1 MAFF303099|WP_010912645.1 USDA_110|WP_011087555.1 113_2|113-2GL004501	-D(P)H-dependent FMN reductase	S
	Core cluster	USDA205|WP_014327207.1 Sm2011|AGG73103.1 7653R|AID27899.1 MAFF303099|WP_044548899.1 USDA_110|WP_028172745.1 113_2|113-2GL008520	2''-deoxycytidine 5''-triphosphate deaminase	F
	Core cluster	USDA205|WP_037398682.1 Sm2011|AGG75931.1 7653R|AID33136.2 MAFF303099|WP_010912162.1 USDA_110|WP_011083455.1 113_2|113-2GL000212	Pfam:DUF2159	S
	Core cluster	USDA205|WP_037391214.1 Sm2011|AGG73658.1 7653R|AID29102.1 MAFF303099|WP_010915166.1 USDA_110|WP_028171076.1 113_2|113-2GL005408	cyclopropane-fatty-acyl-phospholipid synthase	M
	Core cluster	USDA205|WP_037398688.1 Sm2011|AGG75936.1 7653R|AID33443.1 MAFF303099|WP_010912471.1 USDA_110|WP_011083460.1 113_2|113-2GL000207	-D-binding protein involved in the addition of a carboxymethylaminomethyl (cmnm) group at the wobble position (U34) of certain tR-s, forming tR--cmnm(5)s(2)U34 (By similarity)	D
	Core cluster	USDA205|WP_037428367.1 Sm2011|AGG72469.1 7653R|AID32576.1 MAFF303099|WP_010911605.1 USDA_110|WP_038966112.1 113_2|113-2GL001139	Phosphonate metabolim protein, transferase hexapeptide repeat family	S
	Core cluster	USDA205|WP_037398643.1 Sm2011|AGG75915.1 7653R|AID33375.1 MAFF303099|WP_010912399.1 USDA_110|WP_011083332.1 113_2|113-2GL000365	Catalyzes the -DPH-dependent formation of L-aspartate- semialdehyde (L-ASA) by the reductive dephosphorylation of L- aspartyl-4-phosphate (By similarity)	E
	Core cluster	USDA205|WP_037432830.1 Sm2011|AGG71313.1 7653R|AID28577.1 MAFF303099|WP_010914684.1 USDA_110|WP_011086697.1 113_2|113-2GL005569	Binding-protein-dependent transport systems inner membrane component	P
	Core cluster	USDA205|WP_012708803.1 Sm2011|AGG74929.1 7653R|AID32049.1 MAFF303099|WP_019860633.1 USDA_110|WP_162494158.1 113_2|113-2GL001686	Two component transcriptional regulator, winged helix family	T
	Core cluster	USDA205|WP_060563381.1 Sm2011|AGG75401.1 7653R|AID32343.1 MAFF303099|WP_010911361.1 USDA_110|WP_011090469.1 113_2|113-2GL001369	Glutamate synthase	E
	Core cluster	USDA205|WP_037396618.1 Sm2011|AGG74421.1 7653R|AID30304.1 MAFF303099|WP_010909672.1 USDA_110|WP_011088645.1 113_2|113-2GL003301	Metallophosphoesterase	S
	Core cluster	USDA205|WP_080577862.1 Sm2011|AGG74707.1 7653R|AID30891.1 MAFF303099|WP_010910173.1 USDA_110|WP_011089244.1 113_2|113-2GL002740	Catalyzes the transfer of a dimethylallyl group onto the adenine at position 37 in tR-s that read codons beginning with uridine, leading to the formation of N6-(dimethylallyl)adenosine (i(6)A) (By similarity)	J
	Core cluster	USDA205|WP_014327823.1 Sm2011|AGG73710.1 7653R|AID29095.1 MAFF303099|WP_019857258.1 USDA_110|WP_011086847.1 113_2|113-2GL005411	replicative D- helicase	L
	Core cluster	USDA205|WP_014329137.1 Sm2011|AGG74955.1 7653R|AID32103.2 MAFF303099|WP_044550843.1 USDA_110|WP_038967402.1 113_2|113-2GL007155	Nudix hydrolase	L
	Core cluster	USDA205|WP_153451915.1 Sm2011|AGG71365.1 7653R|AID28154.1 USDA_110|WP_011086907.1 113_2|113-2GL005342 MAFF303099|WP_010913677.1	Aminotransferase	E
	Dispensable cluster	USDA205|WP_037434468.1 Sm2011|AGG70732.1 MAFF303099|WP_044550849.1 USDA_110|WP_011086729.1 113_2|113-2GL005537 MAFF303099|WP_010910552.1	Transcriptional regulator, TetR family	K
	Core cluster	USDA205|WP_037398745.1 Sm2011|AGG72834.1 7653R|AID34046.1 MAFF303099|WP_010913038.1 USDA_110|WP_011083564.1 113_2|113-2GL000096	Cytidine monophosphate kinase	F
	Core cluster	USDA205|WP_037391278.1 Sm2011|AGG73581.1 7653R|AID28942.2 MAFF303099|WP_044551557.1 USDA_110|WP_063921434.1 113_2|113-2GL006463	Histidine kinase	T
	Core cluster	USDA205|WP_153451732.1 Sm2011|AGG72062.1 7653R|AID31094.2 MAFF303099|WP_010910361.1 USDA_110|WP_011083940.1 113_2|113-2GL008503	ABC transporter, (ATP-binding protein)	P
	Core cluster	USDA205|WP_037401737.1 Sm2011|AGG73968.1 7653R|AID29930.1 MAFF303099|WP_010909296.1 USDA_110|WP_011088122.1 113_2|113-2GL003887	Pseudouridine synthase	J
	Core cluster	USDA205|WP_037468298.1 Sm2011|AGG73892.1 7653R|AID30183.1 MAFF303099|WP_010909573.1 USDA_110|WP_011087849.1 113_2|113-2GL004185	Allows the formation of correctly charged Gln-tR-(Gln) through the transamidation of misacylated Glu-tR-(Gln) in organisms which lack glutaminyl-tR- synthetase. The reaction takes place in the presence of glutamine and ATP through an activated gamma-phospho-Glu-tR-(Gln) (By similarity)	J
	Core cluster	USDA205|WP_037401210.1 Sm2011|AGG73351.1 7653R|AID28310.1 MAFF303099|WP_010914411.1 USDA_110|WP_011083983.1 113_2|113-2GL008456	Glutamate--cysteine ligase	H
	Core cluster	USDA205|WP_037400525.1 Sm2011|AGG72786.1 7653R|AID34159.1 MAFF303099|WP_010913146.1 USDA_110|WP_011083518.1 113_2|113-2GL000146	CysZ-like protein	E
	Core cluster	USDA205|WP_037399499.1 Sm2011|AGG73403.1 7653R|AID33610.1 MAFF303099|WP_044548631.1 USDA_110|WP_011090023.1 113_2|113-2GL001886	2-dehydro-3-deoxygalactonokinase EC 2.7.1.58	G
	Core cluster	USDA205|WP_037433153.1 Sm2011|AGG70705.1 7653R|AID28103.1 MAFF303099|WP_010914534.1 USDA_110|WP_038967956.1 113_2|113-2GL003803	Acetylornithine deacetylase	E
	Dispensable cluster	Sm2011|AGG71563.1 USDA_110|WP_011087705.1 113_2|113-2GL004333 7653R|QGU20985.1 MAFF303099|WP_010913411.1 7653R|QGU20963.1	acyltransferase	I
	Core cluster	USDA205|WP_014327049.1 Sm2011|AGG72963.1 7653R|AID32499.1 MAFF303099|WP_010911490.1 USDA_110|WP_038965157.1 113_2|113-2GL000115	OstA family	S
	Core cluster	USDA205|WP_037455907.1 Sm2011|AGG75841.1 7653R|AID33366.1 MAFF303099|WP_010912392.1 USDA_110|WP_011083313.1 113_2|113-2GL000386	30s ribosomal protein s16	J
	Core cluster	USDA205|WP_014328120.1 Sm2011|AGG74000.1 7653R|AID30467.1 MAFF303099|WP_010909760.1 USDA_110|WP_011088271.1 113_2|113-2GL003713	Nitrogen-fixing NifU domain protein	C
	Core cluster	USDA205|WP_037396975.1 Sm2011|AGG74772.1 7653R|AID30987.1 MAFF303099|WP_010910260.1 USDA_110|WP_011089348.1 113_2|113-2GL002623	penicillin-binding protein	M
	Core cluster	USDA205|WP_012707529.1 Sm2011|AGG73787.1 7653R|AID29525.1 MAFF303099|WP_008875359.1 USDA_110|WP_011087797.1 113_2|113-2GL004241	Transcriptional regulator, MarR family	K
	Core cluster	USDA205|WP_012708105.1 Sm2011|AGG74148.1 7653R|AID31959.1 MAFF303099|WP_010911010.1 USDA_110|WP_027547667.1 113_2|113-2GL001781	transcriptional regulator AsnC family	K
	Core cluster	USDA205|WP_109982152.1 Sm2011|AGG74444.1 7653R|AID29319.1 MAFF303099|WP_010915411.1 USDA_110|WP_011089259.1 113_2|113-2GL002725	fumarate hydratase class II	C
	Core cluster	USDA205|WP_014328196.1 Sm2011|AGG74077.1 7653R|AID30156.1 MAFF303099|WP_010909550.1 USDA_110|WP_028171750.1 113_2|113-2GL004423	Responsible for the release of ribosomes from messenger R- at the termination of protein biosynthesis. May increase the efficiency of translation by recycling ribosomes from one round of translation to another (By similarity)	J
	Core cluster	USDA205|WP_037393620.1 Sm2011|AGG75354.1 7653R|AID32899.1 MAFF303099|WP_010911920.1 USDA_110|WP_011084339.1 113_2|113-2GL008056	Glyceraldehyde-3-phosphate dehydrogenase	G
	Core cluster	USDA205|WP_014327329.1 Sm2011|AGG73232.1 7653R|AID32235.1 MAFF303099|WP_010911266.1 USDA_110|WP_011089617.1 113_2|113-2GL002336	flagellar motor switch protein	N
	Core cluster	USDA205|WP_014327868.1 Sm2011|AGG73765.1 7653R|AID29202.1 MAFF303099|WP_010915250.1 USDA_110|WP_011086899.1 113_2|113-2GL005351	phosphoribosylaminoimidazole synthetase	F
	Core cluster	USDA205|WP_037396108.1 Sm2011|AGG74979.1 7653R|AID32140.1 MAFF303099|WP_044550846.1 USDA_110|WP_011085276.1 113_2|113-2GL007130	anthranilate synthase component i	E
	Core cluster	USDA205|WP_037392029.1 Sm2011|AGG73246.1 7653R|AID32249.1 MAFF303099|WP_010911280.1 USDA_110|WP_011089607.1 113_2|113-2GL002346	Assembles around the rod to form the L-ring and probably protects the motor basal body from shearing forces during rotation (By similarity)	N
	Core cluster	USDA205|WP_014327903.1 Sm2011|AGG73798.1 7653R|AID29539.2 MAFF303099|WP_010915598.1 USDA_110|WP_063921602.1 113_2|113-2GL008618	Major facilitator superfamily	G
	Core cluster	USDA205|WP_014330026.1 Sm2011|AGG75614.1 7653R|AID29446.1 MAFF303099|WP_010915522.1 USDA_110|WP_028173843.1 113_2|113-2GL001343	ABC transporter	P
	Core cluster	USDA205|WP_012708807.1 Sm2011|AGG74933.1 7653R|AID32054.1 MAFF303099|WP_013893499.1 USDA_110|WP_028174670.1 113_2|113-2GL001694	Pfam:DUF1790	S
	Core cluster	USDA205|WP_014328178.1 Sm2011|AGG74059.1 7653R|AID29312.1 MAFF303099|WP_010915402.1 USDA_110|WP_011088337.1 113_2|113-2GL003638	salicylate hydroxylase	C
	Core cluster	USDA205|WP_014330682.1 Sm2011|AGG72835.1 7653R|AID34045.1 MAFF303099|WP_010913037.1 USDA_110|WP_027546860.1 113_2|113-2GL000095	thus facilitating recognition of the initiation point. It is needed to translate mR- with a short Shine-Dalgarno (SD) purine-rich sequence (By similarity)	J
	Core cluster	USDA205|WP_014327126.1 Sm2011|AGG73048.1 7653R|AID29342.1 MAFF303099|WP_044551660.1 USDA_110|WP_038966146.1 113_2|113-2GL001255	Pfam:UPF0153	S
	Core cluster	USDA205|WP_012707756.1 Sm2011|AGG73937.1 7653R|AID29899.1 MAFF303099|WP_010909275.1 USDA_110|WP_011088149.1 113_2|113-2GL003854	One of the early assembly proteins it binds 23S rR-. One of the proteins that surrounds the polypeptide exit tunnel on the outside of the ribosome. Forms the main docking site for trigger factor binding to the ribosome (By similarity)	J
	Core cluster	USDA205|WP_037391146.1 Sm2011|AGG73738.1 7653R|AID29890.1 MAFF303099|WP_010909269.1 USDA_110|WP_011085989.1 113_2|113-2GL006316	1-dehydrogenase	G
	Core cluster	USDA205|WP_037398299.1 Sm2011|AGG72742.1 7653R|AID33570.1 MAFF303099|WP_010912592.1 USDA_110|WP_038965144.1 113_2|113-2GL000153	Catalyzes the conversion of 4-hydroxy- tetrahydrodipicolinate (HTPA) to tetrahydrodipicolinate (By similarity)	E
	Core cluster	USDA205|WP_014330539.1 Sm2011|AGG72752.1 7653R|AID34338.1 MAFF303099|WP_010913335.1 USDA_110|WP_011083590.1 113_2|113-2GL000066	Aspartyl-tR- synthetase	S
	Core cluster	USDA205|WP_014328327.1 Sm2011|AGG74246.1 7653R|AID30132.2 MAFF303099|WP_010909526.1 USDA_110|WP_011087579.1 113_2|113-2GL004476	Together with MoaA, is involved in the conversion of 5'- GTP to cyclic pyranopterin monophosphate (cPMP or molybdopterin precursor Z) (By similarity)	H
	Core cluster	USDA205|WP_014330396.1 Sm2011|AGG72607.1 7653R|AID33920.1 MAFF303099|WP_010912920.1 USDA_110|WP_011083731.1 113_2|113-2GL008735	Protein of unknown function DUF45	S
	Core cluster	USDA205|WP_037436643.1 Sm2011|AGG73370.1 7653R|AID34302.2 MAFF303099|WP_010913297.1 USDA_110|WP_011085615.1 113_2|113-2GL006710	Pyridine nucleotide-disulphide oxidoreductase	C
	Core cluster	USDA205|WP_012709729.1 Sm2011|AGG75816.1 7653R|AID33344.2 MAFF303099|WP_044548481.1 USDA_110|WP_011083363.1 113_2|113-2GL000329	Pterin carbinolamine dehydratase	H
	Core cluster	USDA205|WP_014328225.1 Sm2011|AGG74108.1 7653R|AID30539.1 MAFF303099|WP_010909892.1 USDA_110|WP_011087519.1 113_2|113-2GL004542	Part of the twin-arginine translocation (Tat) system that transports large folded proteins containing a characteristic twin-arginine motif in their signal peptide across membranes. TatA could form the protein-conducting channel of the Tat system (By similarity)	U
	Core cluster	USDA205|WP_037398169.1 Sm2011|AGG72624.1 7653R|AID33941.2 MAFF303099|WP_010912941.1 USDA_110|WP_028175918.1 113_2|113-2GL001030	Histidine kinase	T
	Core cluster	USDA205|WP_037397039.1 Sm2011|AGG74837.1 7653R|AID31652.1 MAFF303099|WP_010914263.1 USDA_110|WP_011086119.1 113_2|113-2GL006186	short-chain dehydrogenase reductase	S
	Core cluster	USDA205|WP_014328164.1 Sm2011|AGG74046.1 7653R|AID29996.1 MAFF303099|WP_010909349.1 USDA_110|WP_011087265.1 113_2|113-2GL004859	mazG family	F
	Core cluster	USDA205|WP_080577692.1 7653R|AID34131.1 MAFF303099|WP_010913116.1 USDA_110|WP_011086348.1 113_2|113-2GL005957 Sm2011|AGG70416.1	ABC transporter substrate-binding protein	G
	Core cluster	USDA205|WP_014330018.1 Sm2011|AGG75604.1 7653R|AID30217.1 MAFF303099|WP_010909600.1 USDA_110|WP_011085225.1 113_2|113-2GL007189	ABC transporter	E
	Core cluster	USDA205|WP_037432046.1 Sm2011|AGG72292.1 7653R|QGU20945.1 MAFF303099|WP_044549438.1 USDA_110|WP_011086615.1 113_2|113-2GL005673	Protein of unknown function (DUF763)	S
	Core cluster	USDA205|WP_153451525.1 Sm2011|AGG74106.1 7653R|AID30540.1 MAFF303099|WP_010909893.1 USDA_110|WP_028171841.1 113_2|113-2GL004541	Participates in chromosomal partition during cell division. May act via the formation of a condensin-like complex containing Smc and ScpA that pull D- away from mid-cell into both cell halves (By similarity)	K
	Core cluster	USDA205|WP_153451978.1 Sm2011|AGG74732.1 7653R|AID31112.1 MAFF303099|WP_010910378.1 USDA_110|WP_011088362.1 113_2|113-2GL003611	Antioxidant protein with alkyl hydroperoxidase activity. Required for the reduction of the AhpC active site cysteine residues and for the regeneration of the AhpC enzyme activity (By similarity)	S
	Core cluster	USDA205|WP_014327995.1 Sm2011|AGG73857.1 7653R|AID30774.1 MAFF303099|WP_010910100.1 USDA_110|WP_011087673.1 113_2|113-2GL004369	subunit l	C
	Core cluster	USDA205|WP_037398044.1 Sm2011|AGG75615.1 7653R|AID29445.2 MAFF303099|WP_010915521.1 USDA_110|WP_011090495.1 113_2|113-2GL001344	ABC transporter	P
	Core cluster	USDA205|WP_014328009.1 Sm2011|AGG73871.1 7653R|AID30352.1 MAFF303099|WP_044547714.1 USDA_110|WP_011087884.1 113_2|113-2GL004145	Poorly processive, error-prone D- polymerase involved in untargeted mutagenesis. Copies undamaged D- at stalled replication forks, which arise in vivo from mismatched or misaligned primer ends. These misaligned primers can be extended by PolIV. Exhibits no 3'-5' exonuclease (proofreading) activity. May be involved in translesional synthesis, in conjunction with the beta clamp from PolIII (By simi…	L
	Core cluster	USDA205|WP_080579232.1 Sm2011|AGG72525.1 7653R|AID30265.1 MAFF303099|WP_044547683.1 USDA_110|WP_011084266.1 113_2|113-2GL008131	ABC transporter permease protein	E
	Core cluster	USDA205|WP_037396621.1 Sm2011|AGG74422.1 7653R|AID30307.1 MAFF303099|WP_010909674.1 USDA_110|WP_011086918.1 113_2|113-2GL005329	Malic enzyme	C
	Core cluster	USDA205|WP_014330755.1 Sm2011|AGG72907.1 7653R|AID33565.1 MAFF303099|WP_010912586.1 USDA_110|WP_011083540.1 113_2|113-2GL000121	Glutathione S-transferase	O
	Core cluster	USDA205|WP_086018582.1 Sm2011|AGG73604.1 7653R|AID28983.2 MAFF303099|WP_044549804.1 USDA_110|WP_011085924.1 113_2|113-2GL006388	Histidine kinase	T
	Core cluster	USDA205|WP_014327361.1 Sm2011|AGG73266.1 7653R|AID32284.1 MAFF303099|WP_010911310.1 USDA_110|WP_011089590.1 113_2|113-2GL002364	flagellar biosynthesis protein, FlhA	N
	Core cluster	USDA205|WP_060563868.1 Sm2011|AGG72745.1 7653R|AID32483.1 MAFF303099|WP_032931663.1 USDA_110|WP_011083513.1 113_2|113-2GL000151	Methyltransferase	L
	Core cluster	USDA205|WP_037394659.1 Sm2011|AGG75256.1 7653R|AID32733.1 MAFF303099|WP_010911760.1 USDA_110|WP_011083054.1 113_2|113-2GL000666	Thiolesterase that catalyzes the hydrolysis of S-D- lactoyl-glutathione to form glutathione and D-lactic acid (By similarity)	C
	Core cluster	USDA205|WP_037394427.1 Sm2011|AGG75055.1 7653R|QGU20615.1 MAFF303099|WP_010912817.1 USDA_110|WP_011084276.1 113_2|113-2GL008120	Facilitates the functional incorporation of the urease nickel metallocenter. This process requires GTP hydrolysis, probably effectuated by UreG (By similarity)	F
	Core cluster	USDA205|WP_037394537.1 Sm2011|AGG75036.1 7653R|AID33775.1 MAFF303099|WP_032932545.1 USDA_110|WP_038966047.1 113_2|113-2GL006300	binding-protein-dependent transport systems inner membrane component	P
	Core cluster	USDA205|WP_037428387.1 Sm2011|AGG72462.1 7653R|QGU20652.1 MAFF303099|WP_010911597.1 USDA_110|WP_011084038.1 113_2|113-2GL008396	Transcriptional regulator	K
[truncated: 15,260 more rows]
