# Supplementary material for: Whole-Genome Sequencing of Bradyrhizobium diazoefficiens 113-2 and Comparative Genomic Analysis Provide Molecular Insights Into Species Specificity and Host Specificity
Source: Front Microbiol. 2020 Nov 16;11:576800. doi: 10.3389/fmicb.2020.576800 (PMC7709874; doi:10.3389/fmicb.2020.576800)
Supplement: Supplementary Table 10 — The detailed information of the genes related to different secretion system in the six genomes. [file Table_10.XLS]

## Sheet: Sheet1
	Supplemental Table S10: The detailed information of the genes related to different secretion system in the six genomes.
	Representative Gene	Gene ID	Annotation
	Core cluster	USDA205|WP_014330375.1 Sm2011|AGG72587.1 7653R|AID33493.1 MAFF303099|WP_010912514.1 USDA_110|WP_011083468.1 113_2|113-2GL000197	One of the proteins required for the normal export of preproteins out of the cell cytoplasm. It is a molecular chaperone that binds to a subset of precursor proteins, maintaining them in a translocation-competent state. It also specifically binds to its receptor SecA (By similarity)
	Core cluster	USDA205|WP_037393883.1 Sm2011|AGG75839.1 7653R|QGU20926.1 MAFF303099|WP_010912390.1 USDA_110|WP_038965072.1 113_2|113-2GL000387	Involved in targeting and insertion of nascent membrane proteins into the cytoplasmic membrane. Binds to the hydrophobic signal sequence of the ribosome-nascent chain (RNC) as it emerges from the ribosomes. The SRP-RNC complex is then targeted to the cytoplasmic membrane where it interacts with the SRP receptor FtsY. Interaction with FtsY leads to the transfer of the RNC complex to the Sec transl…
	Core cluster	USDA205|WP_014327113.1 Sm2011|AGG73024.1 7653R|AID33684.1 MAFF303099|WP_010912724.1 USDA_110|WP_038966085.1 113_2|113-2GL001078	Required for the insertion and or proper folding and or complex formation of integral membrane proteins into the membrane. Involved in integration of membrane proteins that insert both dependently and independently of the Sec translocase complex, as well as at least some lipoproteins. Aids folding of multispanning membrane proteins (By similarity)
	Core cluster	USDA205|WP_012707741.1 Sm2011|AGG73921.1 7653R|AID29881.1 MAFF303099|WP_010909260.1 USDA_110|WP_007611620.1 113_2|113-2GL003835	Preprotein translocase SecE subunit
	Core cluster	USDA205|WP_014328074.1 Sm2011|AGG73955.1 7653R|AID29917.1 MAFF303099|WP_010909287.1 USDA_110|WP_011088135.1 113_2|113-2GL003872	The central subunit of the protein translocation channel SecYEG. Consists of two halves formed by TMs 1-5 and 6-10. These two domains form a lateral gate at the front which open onto the bilayer between TMs 2 and 7, and are clamped together by SecE at the back. The channel is closed by both a pore ring composed of hydrophobic SecY resides and a short helix (helix 2A) on the extracellular side of …
	Core cluster	USDA205|WP_014328227.1 Sm2011|AGG74110.1 7653R|AID30537.1 MAFF303099|WP_010909890.1 USDA_110|WP_011087517.1 113_2|113-2GL004544	Part of the twin-arginine translocation (Tat) system that transports large folded proteins containing a characteristic twin-arginine motif in their signal peptide across membranes. Together with TatB, TatC is part of a receptor directly interacting with Tat signal peptides (By similarity)
	Core cluster	USDA205|WP_037435264.1 Sm2011|AGG74117.1 7653R|AID30529.1 MAFF303099|WP_010909882.1 USDA_110|WP_011087504.1 113_2|113-2GL004557	Preprotein translocase YajC subunit
	Core cluster	USDA205|WP_037435871.1 Sm2011|AGG75836.1 7653R|QGU20634.1 MAFF303099|WP_044548471.1 USDA_110|WP_011083304.1 113_2|113-2GL000395	Involved in targeting and insertion of nascent membrane proteins into the cytoplasmic membrane. Acts as a receptor for the complex formed by the signal recognition particle (SRP) and the ribosome-nascent chain (RNC). Interaction with SRP-RNC leads to the transfer of the RNC complex to the Sec translocase for insertion into the membrane, the hydrolysis of GTP by both Ffh and FtsY, and the dissocia…
	Core cluster	USDA205|WP_014329524.1 Sm2011|AGG75219.1 7653R|AID32668.1 MAFF303099|WP_010911695.1 USDA_110|WP_011083036.1 113_2|113-2GL000685	Part of the Sec protein translocase complex. Interacts with the SecYEG preprotein conducting channel. Has a central role in coupling the hydrolysis of ATP to the transfer of proteins into and across the cell membrane, serving both as a receptor for the preprotein-SecB complex and as an ATP-driven molecular motor driving the stepwise translocation of polypeptide chains across the membrane (By simi…
	Core cluster	113_2|113-2GL004481 USDA205|WP_037400469.1 Sm2011|AGG74018.1 7653R|AID30127.1 MAFF303099|WP_010909520.1 USDA_110|WP_011087574.1	Preprotein translocase subunit SecG
	Core cluster	USDA205|WP_014328226.1 Sm2011|AGG74109.1 7653R|AID30538.1 MAFF303099|WP_044547812.1 USDA_110|WP_011087518.1 113_2|113-2GL004543	Part of the twin-arginine translocation (Tat) system that transports large folded proteins containing a characteristic twin-arginine motif in their signal peptide across membranes. Together with TatC, TatB is part of a receptor directly interacting with Tat signal peptides. TatB may form an oligomeric binding site that transiently accommodates folded Tat precursor proteins before their translocat…
	Core cluster	USDA205|WP_037393390.1 Sm2011|AGG74118.1 7653R|AID30528.1 MAFF303099|WP_010909881.1 USDA205|WP_014327248.1 Sm2011|AGG73149.1 USDA_110|WP_011087503.1 113_2|113-2GL004558	Part of the Sec protein translocase complex. Interacts with the SecYEG preprotein conducting channel. SecDF uses the proton motive force (PMF) to complete protein translocation after the ATP-dependent function of SecA (By similarity)
	Core cluster	USDA205|WP_014328210.1 Sm2011|AGG74093.1 7653R|AID30561.2 MAFF303099|WP_032930559.1 USDA_110|WP_038965742.1 113_2|113-2GL006500 USDA_110|WP_011087245.1 113_2|113-2GL004883	type I secretion outer membrane protein, TolC
	Core cluster	USDA205|WP_014328225.1 Sm2011|AGG74108.1 7653R|AID30539.1 MAFF303099|WP_010909892.1 USDA_110|WP_011087519.1 113_2|113-2GL004542	Part of the twin-arginine translocation (Tat) system that transports large folded proteins containing a characteristic twin-arginine motif in their signal peptide across membranes. TatA could form the protein-conducting channel of the Tat system (By similarity)
	Core cluster	USDA205|WP_037393390.1 Sm2011|AGG74118.1 7653R|AID30528.1 MAFF303099|WP_010909881.1 USDA205|WP_014327248.1 Sm2011|AGG73149.1 USDA_110|WP_011087503.1 113_2|113-2GL004558	Part of the Sec protein translocase complex. Interacts with the SecYEG preprotein conducting channel. SecDF uses the proton motive force (PMF) to complete protein translocation after the ATP-dependent function of SecA (By similarity)
	Core cluster	USDA205|WP_037432065.1 Sm2011|AGG70545.1 USDA205|WP_014330509.1 Sm2011|AGG72725.1 7653R|AID27854.2 MAFF303099|WP_010913356.1 USDA_110|WP_011084253.1 113_2|113-2GL008146	type II secretion system protein E
	Core cluster	USDA205|WP_037395307.1 Sm2011|AGG73254.1 7653R|AID32258.2 MAFF303099|WP_044548297.1 USDA_110|WP_011089600.1 113_2|113-2GL002353	ompa motb domain protein
	Core cluster	USDA205|WP_014329743.1 Sm2011|AGG75367.1 7653R|AID33046.1 MAFF303099|WP_010912054.1 USDA_110|WP_011084326.1 113_2|113-2GL008070	ompa motb domain protein
	Core cluster	USDA205|WP_037436826.1 Sm2011|AGG74453.1 7653R|AID31829.2 MAFF303099|WP_010910902.1 USDA_110|WP_011083352.1 113_2|113-2GL000343	Ompa motb domain protein
	Core cluster	113_2|113-2GL002330 USDA205|WP_014327334.1 Sm2011|AGG73237.1 7653R|AID32240.1 MAFF303099|WP_010911271.1 USDA_110|WP_011089623.1	Flagellum-specific ATP synthase
	Core cluster	USDA205|WP_012709824.1 Sm2011|AGG75938.1 7653R|AID33446.2 MAFF303099|WP_010912474.1 USDA_110|WP_011083462.1 113_2|113-2GL000204	Facilitates transcription termination by a mechanism that involves Rho binding to the nascent R-, activation of Rho's R--dependent ATPase activity, and release of the mR- from the D- template (By similarity)
	Core cluster	USDA205|WP_037436826.1 Sm2011|AGG74453.1 7653R|AID31829.2 MAFF303099|WP_010910902.1 USDA_110|WP_011083352.1 113_2|113-2GL000343	Ompa motb domain protein
	Core cluster	USDA205|WP_014330037.1 Sm2011|AGG75623.1 7653R|AID33128.1 MAFF303099|WP_010912154.1 USDA_110|WP_011083274.1 113_2|113-2GL000429	Produces ATP from ADP in the presence of a proton gradient across the membrane. The alpha chain is a regulatory subunit (By similarity)
	Core cluster	USDA205|WP_014330035.1 Sm2011|AGG75621.1 7653R|AID33126.2 MAFF303099|WP_032932130.1 USDA_110|WP_011083272.1 113_2|113-2GL000431	Produces ATP from ADP in the presence of a proton gradient across the membrane. The catalytic sites are hosted primarily by the beta subunits (By similarity)
	Core cluster	USDA205|WP_037435151.1 Sm2011|AGG75488.1 7653R|AID33693.1 MAFF303099|WP_010912729.1 USDA_110|WP_038966096.1 113_2|113-2GL001129	secretion protein (HlyD
	Core cluster	USDA205|WP_037433272.1 Sm2011|AGG72301.1 7653R|AID28230.2 MAFF303099|WP_010909848.1 USDA_110|WP_028173732.1 113_2|113-2GL001190 Sm2011|AGG74626.1 MAFF303099|WP_010914315.1	Type I secretion membrane fusion protein (HlyD
	Core cluster	USDA205|WP_014329704.1 Sm2011|AGG75329.1 7653R|AID33018.1 MAFF303099|WP_010912025.1 USDA_110|WP_011089884.1 113_2|113-2GL002049	Peptidoglycan-associated lipoprotein
	Core cluster	USDA205|WP_014329916.1 Sm2011|AGG75536.1 7653R|AID31978.2 MAFF303099|WP_010911027.1 USDA_110|WP_011089709.1 113_2|113-2GL002245	Type I secretion membrane fusion protein (HlyD
	Core cluster	113_2|113-2GL002330 USDA205|WP_014327334.1 Sm2011|AGG73237.1 7653R|AID32240.1 MAFF303099|WP_010911271.1 USDA_110|WP_011089623.1	Flagellum-specific ATP synthase
	Core cluster	USDA205|WP_014327327.1 Sm2011|AGG73230.1 7653R|AID32232.1 MAFF303099|WP_010911264.1 USDA_110|WP_011089615.1 113_2|113-2GL002338	flagellar biosynthetic protein flhB
	Core cluster	USDA205|WP_014327344.1 Sm2011|AGG73248.1 7653R|AID32251.1 MAFF303099|WP_010911282.1 USDA_110|WP_011089605.1 113_2|113-2GL002348	Flagellar biosynthetic protein fliP
	Core cluster	USDA205|WP_037392017.1 Sm2011|AGG73226.1 7653R|AID32256.1 MAFF303099|WP_010911285.1 USDA_110|WP_063921537.1 113_2|113-2GL002351	The M ring may be actively involved in energy transduction (By similarity)
	Core cluster	USDA205|WP_012706883.1 Sm2011|AGG73265.1 7653R|AID32269.1 MAFF303099|WP_010911298.1 USDA_110|WP_008130649.1 113_2|113-2GL002363	flagellar biosynthetic protein fliQ
	Core cluster	USDA205|WP_014327361.1 Sm2011|AGG73266.1 7653R|AID32284.1 MAFF303099|WP_010911310.1 USDA_110|WP_011089590.1 113_2|113-2GL002364	flagellar biosynthesis protein, FlhA
	Core cluster	USDA205|WP_014327362.1 Sm2011|AGG73267.1 7653R|AID32285.1 MAFF303099|WP_010911311.1 USDA_110|WP_011089589.1 113_2|113-2GL002365	Flagellar biosynthesis protein FliR
	Core cluster	USDA205|WP_037428795.1 Sm2011|AGG72073.1 7653R|AID30312.2 MAFF303099|WP_162034348.1 USDA_110|WP_038966424.1 113_2|113-2GL002611	ABC transporter
	Core cluster	USDA205|WP_153451448.1 USDA205|WP_153451446.1 Sm2011|AGG71566.1 Sm2011|AGG72741.1 7653R|AID33569.1 MAFF303099|WP_010912591.1 USDA_110|WP_011088673.1 113_2|113-2GL003272 7653R|AID34177.1 MAFF303099|WP_044548823.1	ABC transporter
	Core cluster	USDA205|WP_014328074.1 Sm2011|AGG73955.1 7653R|AID29917.1 MAFF303099|WP_010909287.1 USDA_110|WP_011088135.1 113_2|113-2GL003872	The central subunit of the protein translocation channel SecYEG. Consists of two halves formed by TMs 1-5 and 6-10. These two domains form a lateral gate at the front which open onto the bilayer between TMs 2 and 7, and are clamped together by SecE at the back. The channel is closed by both a pore ring composed of hydrophobic SecY resides and a short helix (helix 2A) on the extracellular side of …
	Core cluster	USDA205|WP_153451534.1 Sm2011|AGG74066.1 7653R|AID30172.1 MAFF303099|WP_010909564.1 USDA_110|WP_011087911.1 113_2|113-2GL004112	ATP-dependent CLP protease ATP-binding subunit
	Core cluster	USDA205|WP_037391163.1 Sm2011|AGG73699.1 7653R|AID29073.1 MAFF303099|WP_010915144.1 USDA_110|WP_011086576.1 113_2|113-2GL005724	ABC transporter
	Core cluster	USDA205|WP_037396578.1 Sm2011|AGG74406.1 7653R|QGU20673.1 MAFF303099|WP_010911127.1 USDA_110|WP_011085538.1 113_2|113-2GL006790	ABC transporter
	Core cluster	USDA205|WP_153451258.1 Sm2011|AGG75366.1 7653R|AID33050.2 MAFF303099|WP_010912059.1 USDA_110|WP_028173455.1 113_2|113-2GL008072	ABC transporter
	Core cluster	USDA205|WP_153451975.1 Sm2011|AGG72722.1 7653R|AID27850.1 MAFF303099|WP_044548881.1 USDA_110|WP_028173504.1 113_2|113-2GL008143	Type II and III secretion system protein
	Core cluster	USDA205|WP_037394749.1 Sm2011|AGG75200.1 7653R|AID32637.1 MAFF303099|WP_010911666.1 USDA_110|WP_011084221.1 113_2|113-2GL008186	ATP-dependent CLP protease ATP-binding subunit
	Core cluster	USDA205|WP_153451880.1 Sm2011|AGG75882.1 7653R|AID29457.1 MAFF303099|WP_010915532.1 USDA_110|WP_011084139.1 113_2|113-2GL008279	Involved in Beta-(1-- 2)glucan export. Transmembrane domains (TMD) form a pore in the inner membrane and the ATP- binding domain (NBD) is responsible for energy generation (By similarity)
	Dispensable cluster	USDA_110|WP_011088444.1 113_2|113-2GL003520	Part of the Sec protein translocase complex. Interacts with the SecYEG preprotein conducting channel. SecDF uses the proton motive force (PMF) to complete protein translocation after the ATP-dependent function of SecA (By similarity)
	Dispensable cluster	USDA_110|WP_011087502.1 113_2|113-2GL004559	Part of the Sec protein translocase complex. Interacts with the SecYEG preprotein conducting channel. SecDF uses the proton motive force (PMF) to complete protein translocation after the ATP-dependent function of SecA (By similarity)
	Dispensable cluster	USDA_110|WP_011090901.1 113_2|113-2GL000993	-
	Dispensable cluster	USDA_110|WP_038966765.1 113_2|113-2GL002884	type I secretion membrane fusion protein HlyD family
	Dispensable cluster	Sm2011|AGG73678.1 7653R|AID27993.1 USDA_110|WP_011088217.1 113_2|113-2GL003780	type I secretion membrane fusion protein HlyD family
	Dispensable cluster	USDA_110|WP_011088759.1 113_2|113-2GL003184	General secretion pathway protein H
	Dispensable cluster	USDA_110|WP_011088758.1 113_2|113-2GL003186	General secretion pathway protein J
	Dispensable cluster	USDA_110|WP_011088757.1 113_2|113-2GL003187	general secretion pathway protein K
	Dispensable cluster	USDA_110|WP_038967012.1 113_2|113-2GL003188	Fimbrial assembly family protein
	Dispensable cluster	USDA_110|WP_011088755.1 113_2|113-2GL003189	general secretion pathway protein M
	Dispensable cluster	USDA205|WP_037394578.1 MAFF303099|WP_044549419.1	general secretion pathway protein M
	Dispensable cluster	USDA_110|WP_011087502.1 113_2|113-2GL004559	Part of the Sec protein translocase complex. Interacts with the SecYEG preprotein conducting channel. SecDF uses the proton motive force (PMF) to complete protein translocation after the ATP-dependent function of SecA (By similarity)
	Dispensable cluster	USDA_110|WP_011088444.1 113_2|113-2GL003520	Part of the Sec protein translocase complex. Interacts with the SecYEG preprotein conducting channel. SecDF uses the proton motive force (PMF) to complete protein translocation after the ATP-dependent function of SecA (By similarity)
	Dispensable cluster	USDA_110|WP_011086373.1 113_2|113-2GL005933	Protein of unknown function (DUF796)
	Dispensable cluster	7653R|AID31657.2 MAFF303099|WP_162034372.1	Protein of unknown function (DUF796)
	Dispensable cluster	USDA205|WP_048655309.1 MAFF303099|WP_010914357.1 USDA_110|WP_011088763.1 113_2|113-2GL003180	general secretion pathway protein D
	Dispensable cluster	USDA205|WP_032490256.1 7653R|QGU21243.1 MAFF303099|WP_063825847.1 USDA_110|WP_035668374.1 113_2|113-2GL007850	Inherit from COG: general secretion pathway protein D
	Dispensable cluster	113_2|113-2GL003181 USDA205|WP_153451837.1 MAFF303099|WP_032928967.1 USDA_110|WP_011088762.1	type II secretion system protein E
	Dispensable cluster	USDA205|WP_037433247.1 7653R|AID28009.1 MAFF303099|WP_010914084.1	type II secretion system protein E
	Dispensable cluster	USDA_110|WP_011086278.1 113_2|113-2GL006022	type II secretion system protein E
	Dispensable cluster	7653R|AID30376.1 MAFF303099|WP_010909738.1	type II secretion system protein E
	Dispensable cluster	USDA205|WP_014329600.1 MAFF303099|WP_010914351.1 USDA_110|WP_011088761.1 113_2|113-2GL003182	general secretion pathway protein F
	Dispensable cluster	USDA205|WP_050984032.1 MAFF303099|WP_032933108.1 USDA_110|WP_011088760.1 113_2|113-2GL003183	general secretion pathway protein G
	Dispensable cluster	USDA_110|WP_082901051.1 7653R|AID30108.1 MAFF303099|WP_044550466.1 113_2|113-2GL002883	ABC transporter
	Dispensable cluster	USDA_110|WP_011086382.1 7653R|AID31676.1 MAFF303099|WP_044548226.1 113_2|113-2GL005924	Type VI secretion protein IcmF
	Dispensable cluster	7653R|AID31665.1 MAFF303099|WP_010910853.1	Type VI secretion protein IcmF
	Dispensable cluster	7653R|AID31675.2 USDA_110|WP_011086381.1 MAFF303099|WP_010910863.1 113_2|113-2GL005925	ompa motb domain protein
	Dispensable cluster	USDA205|WP_014330705.1 Sm2011|AGG72854.1 7653R|AID29820.1 MAFF303099|WP_010909222.1	ompa motb domain protein
	Dispensable cluster	7653R|AID31664.2 MAFF303099|WP_010910852.1	ompa motb domain protein
	Dispensable cluster	USDA_110|WP_011086377.1 7653R|AID31673.2 MAFF303099|WP_010910861.1 113_2|113-2GL005929	Rhs element Vgr protein
	Dispensable cluster	USDA_110|WP_011086368.1 7653R|AID31653.1 MAFF303099|WP_010910841.1 113_2|113-2GL005937	Type VI secretion
	Dispensable cluster	113_2|113-2GL005932 7653R|QGU21136.1 MAFF303099|WP_010910844.1 USDA_110|WP_038967726.1 7653R|AID31656.1	Type VI secretion protein EvpB
	Dispensable cluster	USDA_110|WP_011086369.1 7653R|QGU21140.1 MAFF303099|WP_010910848.1 113_2|113-2GL005936 7653R|AID31660.1	type VI secretion protein
	Dispensable cluster	USDA_110|WP_027548748.1 7653R|QGU21023.1 MAFF303099|WP_010910851.1 113_2|113-2GL005926 7653R|AID31663.1	type VI secretion protein
	Dispensable cluster	USDA_110|WP_011086382.1 7653R|AID31676.1 MAFF303099|WP_044548226.1 113_2|113-2GL005924	Type VI secretion protein IcmF
	Dispensable cluster	USDA_110|WP_011086368.1 7653R|AID31653.1 MAFF303099|WP_010910841.1 113_2|113-2GL005937	Type VI secretion
	Dispensable cluster	USDA_110|WP_063713277.1 7653R|QGU21135.1 113_2|113-2GL005931	Type VI secretion protein, VC_A0107 family
	Dispensable cluster	USDA_110|WP_011086383.1 113_2|113-2GL005923	Type VI secretion-associated protein, BMA_A0400 family
	Dispensable cluster	7653R|AID31659.1 MAFF303099|WP_010910847.1	type VI secretion protein
	Dispensable cluster	113_2|113-2GL005934 USDA_110|WP_038967727.1	Type VI secretion system lysozyme-related protein
	Dispensable cluster	7653R|AID31662.1 MAFF303099|WP_010910850.1	Inherit from COG: Type VI secretion
	Dispensable cluster	7653R|AID31665.1 MAFF303099|WP_010910853.1	Type VI secretion protein IcmF
	Dispensable cluster	USDA205|WP_037433304.1 USDA205|WP_014857689.1 Sm2011|AGG70185.1 USDA_110|WP_038968102.1 113_2|113-2GL007949	Conjugal transfer coupling protein TraG
	Dispensable cluster	USDA_110|WP_018269525.1 MAFF303099|WP_044547329.1 113_2|113-2GL000855	Conjugal transfer coupling protein TraG
	Dispensable cluster	7653R|AID34376.1 MAFF303099|WP_010915832.1	Conjugal transfer coupling protein TraG
	Dispensable cluster	USDA205|WP_014857567.1 7653R|QGU21254.1 MAFF303099|WP_010913977.1 USDA_110|WP_011084630.1 113_2|113-2GL007839	translocation protein
	Dispensable cluster	USDA205|WP_014857566.1 7653R|QGU21253.1 MAFF303099|WP_010913976.1 USDA_110|WP_011084629.1 113_2|113-2GL007840	Type III secretion
	Dispensable cluster	113_2|113-2GL007848 USDA205|WP_014857558.1 7653R|QGU21245.1 MAFF303099|WP_044549206.1 USDA_110|WP_011084621.1	type iii secretion
	Dispensable cluster	USDA_110|WP_011088117.1 113_2|113-2GL003891	Type III secretion
	Dispensable cluster	USDA205|WP_014857564.1 7653R|QGU21251.1 MAFF303099|WP_010913974.1 USDA_110|WP_011084627.1 113_2|113-2GL007842	Type III
	Dispensable cluster	USDA205|WP_034859390.1 7653R|QGU21250.1 MAFF303099|WP_010913973.1 USDA_110|WP_011084626.1 113_2|113-2GL007843	Surface presentation of antigens (SPOA)
	Dispensable cluster	USDA_110|WP_011088012.1 113_2|113-2GL003998	surface presentation of antigens (SpoA) protein
	Dispensable cluster	USDA_110|WP_011084624.1 7653R|QGU21248.1 MAFF303099|WP_010913971.1 113_2|113-2GL007845	Flagellum-specific ATP synthase
	Dispensable cluster	USDA_110|WP_011084989.1 113_2|113-2GL007491	Flagellum-specific ATP synthase
	Dispensable cluster	USDA205|WP_014857560.1 7653R|QGU21247.1 MAFF303099|WP_010913970.1 USDA_110|WP_011084623.1 113_2|113-2GL007846	Nodulation protein NolV
	Dispensable cluster	USDA205|WP_032490256.1 7653R|QGU21243.1 MAFF303099|WP_063825847.1 USDA_110|WP_035668374.1 113_2|113-2GL007850	Inherit from COG: general secretion pathway protein D
	Dispensable cluster	USDA205|WP_014857573.1 7653R|QGU21187.1 MAFF303099|WP_010913979.1 USDA_110|WP_011084609.1 113_2|113-2GL007858	Low calcium response locus protein D
	Dispensable cluster	USDA205|WP_014857565.1 7653R|QGU21252.1 MAFF303099|WP_044551339.1 USDA_110|WP_011084628.1 113_2|113-2GL007841	Bacterial export proteins, family 3
	Dispensable cluster	USDA_110|WP_038965135.1 113_2|113-2GL000148	secretion protein
	Dispensable cluster	USDA_110|WP_011083493.1 113_2|113-2GL000172	Type II and III secretion system protein
	Dispensable cluster	USDA_110|WP_028175667.1 113_2|113-2GL000527	OmpA MotB domain
	Dispensable cluster	USDA_110|WP_018269525.1 MAFF303099|WP_044547329.1 113_2|113-2GL000855	Conjugal transfer coupling protein TraG
	Dispensable cluster	USDA_110|WP_011090398.1 113_2|113-2GL001450	Type I secretion membrane fusion protein
	Dispensable cluster	USDA205|WP_153451580.1 USDA205|WP_109982171.1 USDA205|WP_153451585.1 Sm2011|AGG72417.1 MAFF303099|WP_010909820.1 USDA_110|WP_011090320.1 113_2|113-2GL001547	secretion protein HlyD family
	Dispensable cluster	USDA_110|WP_038965435.1 113_2|113-2GL001821	domain protein
	Dispensable cluster	USDA_110|WP_011089736.1 113_2|113-2GL002215	The M ring may be actively involved in energy transduction (By similarity)
	Dispensable cluster	USDA_110|WP_011089362.1 113_2|113-2GL002609	secretion protein HlyD family
	Dispensable cluster	113_2|113-2GL002675 USDA_110|WP_038966451.1	OmpA MotB domain-containing protein
	Dispensable cluster	USDA_110|WP_011088998.1 7653R|AID29379.2 MAFF303099|WP_032929768.1 113_2|113-2GL002919	secretion protein (HlyD
	Dispensable cluster	113_2|113-2GL003389 USDA_110|WP_011088559.1	Flagellar biosynthetic protein fliP
	Dispensable cluster	USDA_110|WP_011088555.1 113_2|113-2GL003394	Flagellar biosynthetic protein FliQ
	Dispensable cluster	USDA_110|WP_011088554.1 113_2|113-2GL003395	flagellar biosynthetic protein fliR
	Dispensable cluster	USDA_110|WP_011088553.1 113_2|113-2GL003396	flagellar biosynthetic protein flhB
	Dispensable cluster	USDA_110|WP_011088444.1 113_2|113-2GL003520	Part of the Sec protein translocase complex. Interacts with the SecYEG preprotein conducting channel. SecDF uses the proton motive force (PMF) to complete protein translocation after the ATP-dependent function of SecA (By similarity)
	Dispensable cluster	Sm2011|AGG73678.1 7653R|AID27993.1 USDA_110|WP_011088217.1 113_2|113-2GL003780	type I secretion membrane fusion protein HlyD family
	Dispensable cluster	USDA_110|WP_011088216.1 7653R|AID27994.1 113_2|113-2GL003781	ABC transporter
	Dispensable cluster	USDA_110|WP_011088215.1 7653R|AID27995.2 113_2|113-2GL003782	type I secretion outer membrane protein
	Dispensable cluster	USDA_110|WP_011088156.1 113_2|113-2GL003845	ABC transporter
	Dispensable cluster	Sm2011|AGG69772.1 USDA_110|WP_011086284.1 113_2|113-2GL006017 MAFF303099|WP_032930465.1 7653R|AID30379.2	III secretion system protein
	Dispensable cluster	USDA_110|WP_038967394.1 113_2|113-2GL007177	-
	Dispensable cluster	USDA_110|WP_011085204.1 113_2|113-2GL007216	OmpA MotB domain
	Dispensable cluster	USDA_110|WP_038966504.1 113_2|113-2GL007483	flagellar biosynthesis protein, FlhA
	Dispensable cluster	USDA_110|WP_011084989.1 113_2|113-2GL007491	Flagellum-specific ATP synthase
	Dispensable cluster	USDA205|WP_153451658.1 7653R|AID34618.2 MAFF303099|WP_044551336.1 USDA_110|WP_018647881.1 113_2|113-2GL007815	Type II and III secretion system protein
	Dispensable cluster	USDA_110|WP_011084521.1 113_2|113-2GL007938	-
	Dispensable cluster	USDA_110|WP_011083904.1 113_2|113-2GL008544	domain protein
	Dispensable cluster	USDA_110|WP_011083754.1 113_2|113-2GL008710	secretion protein HlyD
	Singletons	7653R|AID33365.2	Involved in targeting and insertion of nascent membrane proteins into the cytoplasmic membrane. Binds to the hydrophobic signal sequence of the ribosome-nascent chain (RNC) as it emerges from the ribosomes. The SRP-RNC complex is then targeted to the cytoplasmic membrane where it interacts with the SRP receptor FtsY. Interaction with FtsY leads to the transfer of the RNC complex to the Sec transl…
	Singletons	MAFF303099|WP_010909171.1	Inherit from COG: Part of the Sec protein translocase complex. Interacts with the SecYEG preprotein conducting channel. SecDF uses the proton motive force (PMF) to complete protein translocation after the ATP-dependent function of SecA (By similarity)
	Singletons	MAFF303099|WP_010914352.1	General secretion pathway protein H
	Singletons	USDA205|WP_014329599.1	general secretion pathway protein H
	Singletons	MAFF303099|WP_010909171.1	Inherit from COG: Part of the Sec protein translocase complex. Interacts with the SecYEG preprotein conducting channel. SecDF uses the proton motive force (PMF) to complete protein translocation after the ATP-dependent function of SecA (By similarity)
	Singletons	7653R|QGU21137.1	Protein of unknown function (DUF796)
	Singletons	7653R|QGU21026.1	Type VI secretion protein IcmF
	Singletons	7653R|AID29955.1	Ompa motb domain protein
	Singletons	7653R|QGU21025.1	ompa motb domain protein
	Singletons	7653R|QGU21142.1	Rhs element vgr protein
	Singletons	7653R|QGU21026.1	Type VI secretion protein IcmF
	Singletons	7653R|QGU21138.1	Type VI secretion system
	Singletons	MAFF303099|WP_006329207.1	Conjugal transfer coupling protein TraG
	Singletons	113_2|113-2GL007567	trag family
	Singletons	113_2|113-2GL007568	trag family
	Singletons	113_2|113-2GL002838	(ABC) transporter
