# Supplementary material for: Whole-Genome Sequencing of Bradyrhizobium diazoefficiens 113-2 and Comparative Genomic Analysis Provide Molecular Insights Into Species Specificity and Host Specificity
Source: Front Microbiol. 2020 Nov 16;11:576800. doi: 10.3389/fmicb.2020.576800 (PMC7709874; doi:10.3389/fmicb.2020.576800)
Supplement: Supplementary Table 11 — The detail ID information of the genes related to the biosynthesis of EPSs and LPSs in the six genomes. [file Table_11.XLS]

## Sheet: Sheet1
	Supplemental Table S11: The detail ID information of the genes related to the biosynthesis of EPSs and LPSs in the six genomes.
	ExoB	ExoF	ExoL	ExoM	ExoQ	ExoZ	ExoK	ExoA/ExoO/ExoU	ExoY	ExoN/LpxD	ExoI	ExoP	ExpG	ExoX	ExoR	ExoS	ExoT	LpxA	LpxK	LpxXL	LpxC	LpxB	LpxH	RfaC/RfaF	KdtA	GmhB	GmhA	AcpXL	HldD	HldE	KdsA	KdsB
	113-2GL000248	113-2GL002866	MAFF_RS21590	MAFF_RS26560	MAFF_RS21495	113-2GL004333	MAFF_RS21555	113-2GL001567	113-2GL002867	113-2GL000079	113-2GL000267	113-2GL001565	113-2GL004241	MAFF_RS21510	113-2GL003178	113-2GL000076	113-2GL002874	113-2GL001139	113-2GL001631	113-2GL005710	113-2GL002638	113-2GL004435	113-2GL001009	113-2GL001631	113-2GL000045	113-2GL000188	113-2GL003832	113-2GL005706	113-2GL000248	113-2GL000028	113-2GL004487	113-2GL003208
	113-2GL001563	113-2GL007259	MCHK_RS29720	MCHK_RS00900	MAFF_RS26555	113-2GL004627	MCHK_RS29685	113-2GL001568	113-2GL004295	113-2GL002793	113-2GL000504	113-2GL002868	bll5036	MCHK_RS29640	113-2GL004531	113-2GL000179	113-2GL003192	113-2GL002037	113-2GL003275	bll3807	bll6595	bll4847	113-2GL003301	113-2GL003275	113-2GL001630	113-2GL003216	bll5420	bsl3811	113-2GL001563	113-2GL001052	bll4800	113-2GL003231
	113-2GL002377	113-2GL008797	N181_RS19470	N181_RS14700	MCHK_RS00895	113-2GL005613	N181_RS19475	113-2GL003202	113-2GL007283	113-2GL003210	113-2GL000744	113-2GL004297	MAFF_RS34110	N181_RS19500	113-2GL005299	113-2GL000348	113-2GL006157	113-2GL003211	bll7514	MAFF_RS05905	MAFF_RS07295	MAFF_RS03690	bll5904	bll7514	bll0788	blr0650	MAFF_RS11165	MAFF_RS05885	113-2GL002377	113-2GL003277	MAFF_RS02525	113-2GL008162
	113-2GL002505	bll2379	SM2011_RS11975	SM2011_RS17825	MCHK_RS29610	113-2GL007271	SM2011_RS11970	bll7574	bll6310	113-2GL003223	113-2GL007621	113-2GL006158	MCHK_RS08090	SM2011_RS11925	113-2GL008062	113-2GL000490	113-2GL007270	113-2GL003212	blr5929	MCHK_RS13370	MCHK_RS15000	MCHK_RS11050	bll8164	blr5929	bll7515	blr5988	MCHK_RS19520	MCHK_RS13350	113-2GL002505	113-2GL003830	MCHK_RS10200	bll1422
	113-2GL002673	blr0835			N181_RS19125	113-2GL007273		blr6003	blr2358	113-2GL004430	bll0575	113-2GL007279	N181_RS07200		113-2GL008466	113-2GL000551	113-2GL007444	113-2GL003232	MAFF_RS11185	N181_RS05470	N181_RS12660	N181_RS29520	MAFF_RS04350	MAFF_RS11185	MAFF_RS22740	MAFF_RS11160	MCHK_RS32935	N181_RS05445	113-2GL002673	113-2GL004667	N181_RS27995	blr5972
	113-2GL002863	blr6311			N181_RS19515	113-2GL007281		blr7573	blr4974	113-2GL004721	bll2066	bll2362	SM2011_RS11075		bll1155	113-2GL000580	bll3363	113-2GL003644	MAFF_RS11190	SM2011_RS24235	SM2011_RS25415	SM2011_RS22005	MCHK_RS11765	MAFF_RS11190	MAFF_RS33610	MAFF_RS20545		SM2011_RS24260	113-2GL002863	113-2GL005567	N181_RS29195	blr5996
	113-2GL003196	MAFF_RS21500			SM2011_RS11910	113-2GL007534		MAFF_RS00960	MAFF_RS21505	113-2GL008080	blr0145	bll4972	SM2011_RS20450		bll1518	113-2GL000606	bll6011	113-2GL004433	MAFF_RS33615				N181_RS09135	MAFF_RS33615	MCHK_RS07525	MCHK_RS19515			113-2GL003196	113-2GL006295	SM2011_RS21680	MAFF_RS22540
	113-2GL003200	MAFF_RS27685			SM2011_RS13155	bll3890		MAFF_RS08825	MAFF_RS27670	bll0754	blr0372	bll6309			bll4762	113-2GL000630	bll6303	113-2GL005874	MCHK_RS07530				SM2011_RS23740	MCHK_RS07530	MCHK_RS30750	MCHK_RS28575			113-2GL003200	113-2GL006708		MCHK_RS30560
	113-2GL003215	MAFF_RS34275				bll4688		MAFF_RS08830	MAFF_RS30850	bll4608	blr1266	blr3362			bll6024	113-2GL000736	blr2242	113-2GL007269	MCHK_RS19540					MCHK_RS19540	N181_RS00215	N181_RS15885			113-2GL003215	113-2GL006709		N181_RS04370
	113-2GL003224	MCHK_RS01885				bll4940		MAFF_RS12340	MAFF_RS34265	bll4852	MAFF_RS03005	blr7576			blr4172	113-2GL001030	blr2370	bll4849	MCHK_RS19545					MCHK_RS19545	N181_RS21485	SM2011_RS14585			113-2GL003224	113-2GL007774		N181_RS17410
	113-2GL003273	MCHK_RS08300				blr2157		MAFF_RS13900	MCHK_RS01870	bll5980	MAFF_RS03345	MAFF_RS09370			MAFF_RS03515	113-2GL001081	MAFF_RS21585	bll5586	SM2011_RS18450					N181_RS21475	SM2011_RS16410				113-2GL003273	bll2832		SM2011_RS15460
	113-2GL003276	MCHK_RS29630				blr2360		MAFF_RS19750	MCHK_RS04940	blr1499	MAFF_RS33055	MAFF_RS21615			MAFF_RS05550	113-2GL001100	MCHK_RS29715	bll5993						SM2011_RS18450	SM2011_RS18440				113-2GL003276	bll2833
	113-2GL003279	N181_RS00925				blr2367		MAFF_RS21545	MCHK_RS08290	blr5994	MCHK_RS06935	MAFF_RS26585			MAFF_RS16410	113-2GL001517	N181_RS02095	bll6008											113-2GL003279	bll5927
	113-2GL003281	N181_RS02090				blr2369		MAFF_RS21595	MCHK_RS29635	blr6458	MCHK_RS10750	MAFF_RS27625			MAFF_RS23010	113-2GL001685	N181_RS02935	bll7158											113-2GL003281	bll6351
	113-2GL003284	N181_RS19510				MAFF_RS01365		MAFF_RS21600	N181_RS07495	MAFF_RS03710	MCHK_RS34325	MAFF_RS34280			MCHK_RS00165	113-2GL001763	N181_RS18370	blr2371											113-2GL003284	blr0804
	113-2GL003373	N181_RS23845				MAFF_RS01585		MAFF_RS21605	N181_RS19505	MAFF_RS04465	N181_RS14965	MCHK_RS00925			MCHK_RS12935	113-2GL001800	N181_RS21660	blr3649											113-2GL003373	blr1892
	113-2GL003784	SM2011_RS09925				MAFF_RS03945		MAFF_RS21795	N181_RS21640	MAFF_RS12910	N181_RS15780	MCHK_RS01830			MCHK_RS24645	113-2GL001897	SM2011_RS09815	blr5971											113-2GL003784	blr3227
	113-2GL003785	SM2011_RS10385				MAFF_RS04110		MAFF_RS29950	N181_RS23855	MAFF_RS20840	N181_RS19485	MCHK_RS17035			MCHK_RS33470	113-2GL002190	SM2011_RS11945	blr5992											113-2GL003785	blr3922
	113-2GL003829	SM2011_RS11915				MAFF_RS05675		MAFF_RS30835	SM2011_RS09915	MAFF_RS21610	SM2011_RS11955	MCHK_RS29745			N181_RS00730	113-2GL002224		blr7948											113-2GL003829	blr4659
	113-2GL003831	SM2011_RS17245				MAFF_RS08820		MCHK_RS04925	SM2011_RS10390	MAFF_RS24105	SM2011_RS23955	N181_RS02125			N181_RS11415	113-2GL002291		MAFF_RS01750											113-2GL003831	blr5422
	113-2GL005150	SM2011_RS20595				MAFF_RS09495		MCHK_RS16530	SM2011_RS11920	MAFF_RS27660	SM2011_RS32775	N181_RS07510			N181_RS16455	113-2GL002446		MAFF_RS03700											113-2GL005150	blr8124
	113-2GL005568					MAFF_RS21650		MCHK_RS16535	SM2011_RS20585	MAFF_RS30760		N181_RS19120			N181_RS29570	113-2GL002510		MAFF_RS07235											113-2GL005568	MAFF_RS01205
	113-2GL005857					MAFF_RS23205		MCHK_RS20625		MAFF_RS30925		N181_RS19445			SM2011_RS00035	113-2GL002579		MAFF_RS09760											113-2GL005857	MAFF_RS01210
	113-2GL006187					MAFF_RS25135		MCHK_RS27565		MAFF_RS35335		N181_RS23860			SM2011_RS22060	113-2GL003299		MAFF_RS10195											113-2GL006187	MAFF_RS05840
	113-2GL006724					MAFF_RS27635		MCHK_RS29675		MCHK_RS01860		SM2011_RS09910			SM2011_RS28530	113-2GL003316		MAFF_RS11930											113-2GL006724	MAFF_RS08065
	113-2GL007254					MAFF_RS29940		MCHK_RS29725		MCHK_RS04845		SM2011_RS10360				113-2GL003328		MAFF_RS14155											113-2GL007254	MAFF_RS10175
	113-2GL008024					MAFF_RS32660		MCHK_RS29735		MCHK_RS05015		SM2011_RS12000				113-2GL003397		MAFF_RS19365											113-2GL008024	MAFF_RS11170
	113-2GL008025					MAFF_RS32665		MCHK_RS29900		MCHK_RS11070		SM2011_RS13160				113-2GL003528		MAFF_RS19800											113-2GL008025	MAFF_RS13530
	bll0593					MAFF_RS33950		N181_RS02940		MCHK_RS11885		SM2011_RS20600				113-2GL003545		MCHK_RS09300											bll0593	MAFF_RS14935
	bll1630					MAFF_RS34355		N181_RS02945		MCHK_RS21225						113-2GL003758		MCHK_RS09515											bll1630	MAFF_RS15390
	bll1631					MAFF_RS35890		N181_RS05080		MCHK_RS28870						113-2GL003926		MCHK_RS11060											bll1631	MAFF_RS20445
	bll4299					MCHK_RS06815		N181_RS16440		MCHK_RS29740						113-2GL003985		MCHK_RS14945											bll4299	MAFF_RS21855
	bll5464					MCHK_RS06820		N181_RS16445		MCHK_RS31330						113-2GL003990		MCHK_RS17430											bll5464	MAFF_RS29460
	bll5465					MCHK_RS07930		N181_RS19150		N181_RS01400						113-2GL004147		MCHK_RS20295											bll5465	MAFF_RS29490
	bll5833					MCHK_RS08380		N181_RS19455		N181_RS03890						113-2GL004484		MCHK_RS22380											bll5833	MAFF_RS30885
	bll5920					MCHK_RS08905		N181_RS19460		N181_RS06590						113-2GL004518		MCHK_RS27705											bll5920	MAFF_RS31235
	bll5923					MCHK_RS09130		N181_RS19465		N181_RS10255						113-2GL004533		MCHK_RS34240											bll5923	MAFF_RS34495
	bll5925					MCHK_RS11305		N181_RS19495		N181_RS11210						113-2GL004697		N181_RS03915											bll5925	MCHK_RS02590
	bll5928					MCHK_RS11500		N181_RS23905		N181_RS15980						113-2GL004864		N181_RS04570											bll5928	MCHK_RS03520
	bll5979					MCHK_RS13135		N181_RS23910		N181_RS19450						113-2GL004867		N181_RS06455											bll5979	MCHK_RS03550
	bll6007					MCHK_RS14195		SM2011_RS09885		N181_RS29500						113-2GL005161		N181_RS07520											bll6007	MCHK_RS04975
	bll6421					MCHK_RS16525		SM2011_RS10900		SM2011_RS09855						113-2GL005176		N181_RS17155											bll6421	MCHK_RS05345
	blr2382					MCHK_RS17145		SM2011_RS10905		SM2011_RS11110						113-2GL005778		N181_RS18485											blr2382	MCHK_RS08525
	blr2818					MCHK_RS29750		SM2011_RS11055		SM2011_RS11995						113-2GL005789		N181_RS29400											blr2818	MCHK_RS08735
	blr3334					N181_RS04895		SM2011_RS11930		SM2011_RS12720						113-2GL005796		N181_RS29510											blr3334	MCHK_RS08740
	blr3666					N181_RS16730		SM2011_RS11940		SM2011_RS14490						113-2GL005817		SM2011_RS02115											blr3666	MCHK_RS12410
	blr3921					N181_RS19520		SM2011_RS11980		SM2011_RS21985						113-2GL005964		SM2011_RS09510											blr3921	MCHK_RS13305
	blr5421					N181_RS23915		SM2011_RS11985		SM2011_RS22805						113-2GL006028		SM2011_RS12780											blr5421	MCHK_RS17935
	blr5423					N181_RS26315		SM2011_RS11990		SM2011_RS28670						113-2GL006273		SM2011_RS13755											blr5423	MCHK_RS19525
	blr5931					SM2011_RS02790		SM2011_RS13130		SM2011_RS28860						113-2GL006388		SM2011_RS20610											blr5931	MCHK_RS21950
	blr5989					SM2011_RS09440		SM2011_RS13670								113-2GL006396		SM2011_RS21885											blr5989	MCHK_RS23135
	blr6004					SM2011_RS10895		SM2011_RS24620								113-2GL006406		SM2011_RS21995											blr6004	MCHK_RS23590
	blr6312					SM2011_RS11905										113-2GL006426													blr6312	MCHK_RS28475
	blr6564															113-2GL006463													blr6564	MCHK_RS29960
	blr6721															113-2GL006554													blr6721	MCHK_RS33170
	blr6839															113-2GL006555													blr6839	N181_RS00240
	blr7578															113-2GL006678													blr7578	N181_RS00520
	MAFF_RS05460															113-2GL006783													MAFF_RS05460	N181_RS01675
	MAFF_RS06115															113-2GL006858													MAFF_RS06115	N181_RS03585
	MAFF_RS06225															113-2GL006970													MAFF_RS06225	N181_RS08105
	MAFF_RS07860															113-2GL007217													MAFF_RS07860	N181_RS09315
	MAFF_RS08940															113-2GL007218													MAFF_RS08940	N181_RS09320
	MAFF_RS09605															113-2GL007220													MAFF_RS09605	N181_RS13340
	MAFF_RS11180															113-2GL007390													MAFF_RS11180	N181_RS21150
	MAFF_RS12750															113-2GL007392													MAFF_RS12750	N181_RS22010
	MAFF_RS19075															113-2GL007511													MAFF_RS19075	N181_RS22230
	MAFF_RS23320															113-2GL007513													MAFF_RS23320	SM2011_RS10250
	MAFF_RS23950															113-2GL007515													MAFF_RS23950	SM2011_RS11345
	MAFF_RS23955															113-2GL007933													MAFF_RS23955	SM2011_RS12940
	MAFF_RS27640															113-2GL008312													MAFF_RS27640	SM2011_RS15195
	MAFF_RS27675															113-2GL008420													MAFF_RS27675	SM2011_RS16115
	MAFF_RS28380															113-2GL008536													MAFF_RS28380	SM2011_RS16435
	MAFF_RS30755															113-2GL008604													MAFF_RS30755	SM2011_RS16760
	MAFF_RS30770															113-2GL008605													MAFF_RS30770	SM2011_RS23560
	MAFF_RS30800															113-2GL008674													MAFF_RS30800	SM2011_RS23565
	MAFF_RS30845															113-2GL008740													MAFF_RS30845	SM2011_RS26625
	MAFF_RS30855															bll0303													MAFF_RS30855	SM2011_RS29405
	MAFF_RS32055															bll0659													MAFF_RS32055
	MAFF_RS32060															bll0757													MAFF_RS32060
	MAFF_RS34760															bll0905													MAFF_RS34760
	MAFF_RS34925															bll0966													MAFF_RS34925
	MCHK_RS00455															bll1030													MCHK_RS00455
	MCHK_RS01640															bll1031													MCHK_RS01640
	MCHK_RS01840															bll1199													MCHK_RS01840
	MCHK_RS01875															bll1290													MCHK_RS01875
	MCHK_RS02790															bll1715													MCHK_RS02790
	MCHK_RS04840															bll2176													MCHK_RS04840
	MCHK_RS04855															bll2599													MCHK_RS04855
	MCHK_RS04890															bll2760													MCHK_RS04890
	MCHK_RS04935															bll3106													MCHK_RS04935
	MCHK_RS04945															bll3140													MCHK_RS04945
	MCHK_RS06175															bll3249													MCHK_RS06175
	MCHK_RS06180															bll3558													MCHK_RS06180
	MCHK_RS09550															bll3705													MCHK_RS09550
	MCHK_RS13580															bll3738													MCHK_RS13580
	MCHK_RS13690															bll4276													MCHK_RS13690
	MCHK_RS14475															bll4289													MCHK_RS14475
	MCHK_RS15560															bll4760													MCHK_RS15560
	MCHK_RS16645															bll5124													MCHK_RS16645
	MCHK_RS16660															bll5328													MCHK_RS16660
	MCHK_RS17250															bll5488													MCHK_RS17250
	MCHK_RS19535															bll5692													MCHK_RS19535
	MCHK_RS20950															bll5808													MCHK_RS20950
	MCHK_RS21070															bll5889													MCHK_RS21070
	MCHK_RS24295															bll6776													MCHK_RS24295
	MCHK_RS27120															bll6924													MCHK_RS27120
	MCHK_RS33115															bll6988													MCHK_RS33115
	N181_RS00820															bll7016													N181_RS00820
	N181_RS01425															bll7277													N181_RS01425
	N181_RS03895															bll8095													N181_RS03895
	N181_RS03910															blr0154													N181_RS03910
	N181_RS04365															blr0257													N181_RS04365
	N181_RS11585															blr0279													N181_RS11585
	N181_RS11595															blr0329													N181_RS11595
	N181_RS13365															blr0385													N181_RS13365
	N181_RS13535															blr0516													N181_RS13535
	N181_RS13970															blr1090													N181_RS13970
	N181_RS16460															blr1373													N181_RS16460
	N181_RS16470															blr1611													N181_RS16470
	N181_RS17945															blr2178													N181_RS17945
	N181_RS18875															blr2180													N181_RS18875
	N181_RS19525															blr2285													N181_RS19525
	N181_RS19720															blr2287													N181_RS19720
	N181_RS22150															blr2413													N181_RS22150
	N181_RS22170															blr2415													N181_RS22170
	N181_RS24275															blr2697													N181_RS24275
	N181_RS27075															blr2862													N181_RS27075
	N181_RS30515															blr2985													N181_RS30515
	SM2011_RS00670															blr2986													SM2011_RS00670
	SM2011_RS01955															blr3071													SM2011_RS01955
	SM2011_RS05480															blr3122													SM2011_RS05480
	SM2011_RS06655															blr3132													SM2011_RS06655
	SM2011_RS07735															blr3485													SM2011_RS07735
	SM2011_RS07760															blr3730													SM2011_RS07760
	SM2011_RS07765															blr3748													SM2011_RS07765
	SM2011_RS08795															blr4487													SM2011_RS08795
	SM2011_RS08800															blr4489													SM2011_RS08800
	SM2011_RS09825															blr4627													SM2011_RS09825
	SM2011_RS09860															blr4773													SM2011_RS09860
	SM2011_RS10305															blr4803													SM2011_RS10305
	SM2011_RS10325															blr5264													SM2011_RS10325
	SM2011_RS11120															blr5269													SM2011_RS11120
	SM2011_RS11900															blr5677													SM2011_RS11900
	SM2011_RS12725															blr5877													SM2011_RS12725
	SM2011_RS12775															blr5906													SM2011_RS12725
	SM2011_RS13320															blr6652													SM2011_RS12775
	SM2011_RS14875															blr6716													SM2011_RS13320
	SM2011_RS15970															blr7363													SM2011_RS14875
	SM2011_RS16090															blr7396													SM2011_RS15970
	SM2011_RS17130															blr7462													SM2011_RS16090
	SM2011_RS19830															blr7620													SM2011_RS17130
	SM2011_RS21160															blr7985													SM2011_RS19830
	SM2011_RS28360															blr8145													SM2011_RS21160
	SM2011_RS28370															bsr2416													SM2011_RS28360
																MAFF_RS00790													SM2011_RS28370
																MAFF_RS02620
																MAFF_RS02630
																MAFF_RS03350
																MAFF_RS04210
																MAFF_RS04560
																MAFF_RS05035
																MAFF_RS05075
																MAFF_RS05105
																MAFF_RS05145
																MAFF_RS05700
																MAFF_RS06500
																MAFF_RS08090
																MAFF_RS10165
																MAFF_RS10170
																MAFF_RS10485
																MAFF_RS10490
																MAFF_RS11550
																MAFF_RS11845
																MAFF_RS12975
																MAFF_RS13290
																MAFF_RS13645
																MAFF_RS14760
																MAFF_RS15435
																MAFF_RS15665
																MAFF_RS15905
																MAFF_RS18230
																MAFF_RS18410
																MAFF_RS19340
																MAFF_RS19780
																MAFF_RS20850
																MAFF_RS20875
																MAFF_RS21745
																MAFF_RS21995
																MAFF_RS23090
																MAFF_RS23220
																MAFF_RS23300
																MAFF_RS23475
																MAFF_RS23675
																MAFF_RS23925
																MAFF_RS26705
																MAFF_RS26975
																MAFF_RS27025
																MAFF_RS27340
																MAFF_RS27650
																MAFF_RS28000
																MAFF_RS29555
																MAFF_RS31185
																MAFF_RS31325
																MAFF_RS31365
																MAFF_RS31375
																MAFF_RS32295
																MAFF_RS32830
																MAFF_RS32900
																MCHK_RS00245
																MCHK_RS00355
																MCHK_RS00435
																MCHK_RS01305
																MCHK_RS01850
																MCHK_RS02100
																MCHK_RS03610
																MCHK_RS05300
																MCHK_RS05435
																MCHK_RS05475
																MCHK_RS05490
																MCHK_RS06435
																MCHK_RS10285
																MCHK_RS10295
																MCHK_RS10755
																MCHK_RS11625
																MCHK_RS11980
																MCHK_RS13160
																MCHK_RS13960
																MCHK_RS15785
																MCHK_RS17820
																MCHK_RS18420
																MCHK_RS18680
																MCHK_RS19915
																MCHK_RS20215
																MCHK_RS21285
																MCHK_RS21600
																MCHK_RS22065
																MCHK_RS22960
																MCHK_RS23635
																MCHK_RS23870
																MCHK_RS24130
																MCHK_RS26335
																MCHK_RS26485
																MCHK_RS27170
																MCHK_RS27665
																MCHK_RS28880
																MCHK_RS28905
																MCHK_RS29845
																MCHK_RS30110
																MCHK_RS31460
																MCHK_RS33505
																MCHK_RS33610
																N181_RS00110
																N181_RS00400
																N181_RS00540
																N181_RS00590
																N181_RS00805
																N181_RS01875
																N181_RS03050
																N181_RS05950
																N181_RS07850
																N181_RS07980
																N181_RS08215
																N181_RS08930
																N181_RS09310
																N181_RS13715
																N181_RS14055
																N181_RS14845
																N181_RS15220
																N181_RS15825
																N181_RS15970
																N181_RS16590
																N181_RS16605
																N181_RS17495
																N181_RS17620
																N181_RS18725
																N181_RS20240
																N181_RS20285
																N181_RS20500
																N181_RS21460
																N181_RS22045
																N181_RS22115
																N181_RS25515
																N181_RS25520
																N181_RS27305
																N181_RS27345
																N181_RS27410
																N181_RS29280
																N181_RS29730
																N181_RS29990
																SM2011_RS00815
																SM2011_RS02585
																SM2011_RS03115
																SM2011_RS03350
																SM2011_RS04625
																SM2011_RS06345
																SM2011_RS07400
																SM2011_RS07635
																SM2011_RS08315
																SM2011_RS08320
																SM2011_RS10945
																SM2011_RS10990
																SM2011_RS11580
																SM2011_RS11650
																SM2011_RS12345
																SM2011_RS13605
																SM2011_RS14055
																SM2011_RS14070
																SM2011_RS14500
																SM2011_RS14525
																SM2011_RS14640
																SM2011_RS16310
																SM2011_RS16585
																SM2011_RS16890
																SM2011_RS17115
																SM2011_RS17975
																SM2011_RS18475
																SM2011_RS19415
																SM2011_RS19495
																SM2011_RS19535
																SM2011_RS19545
																SM2011_RS20910
																SM2011_RS21760
																SM2011_RS21770
																SM2011_RS23570
																SM2011_RS23960
																SM2011_RS26280
